1 **Title**

2 It happened again: convergent evolution of acylglucose specialized metabolism in black  
3 nightshade and wild tomato

4  
5 **Authors**

6 Yann-Ru Lou<sup>1</sup>, Thilani M. Anthony<sup>1</sup>, Paul D. Fiesel<sup>1</sup>, Rachel E. Arking<sup>3</sup>, Elizabeth M.  
7 Christensen<sup>2</sup>, A. Daniel Jones<sup>1</sup>, and Robert L. Last<sup>1,2\*</sup>

8  
9 **Affiliations**

10 <sup>1</sup>Department of Biochemistry and Molecular Biology, Michigan State University, East Lansing, MI 48824, USA.

11 <sup>2</sup>Department of Plant Biology, Michigan State University, East Lansing, MI 48824, USA.

12 <sup>3</sup>Department of Neuroscience, East Lansing, MI 48824, USA.

13 \*Corresponding author. Email: lastr@msu.edu

14  
15 **Abstract**

16 Plants synthesize myriad phylogenetically-restricted specialized (aka ‘secondary’)  
17 metabolites with diverse structures. Metabolism of acylated sugar esters in epidermal glandular  
18 secreting trichomes across the Solanaceae (nightshade) family are ideal for investigating the  
19 mechanisms of evolutionary metabolic diversification. We developed methods to structurally  
20 analyze acylhexose mixtures by 2D NMR, which led to the insight that the Old World species  
21 black nightshade (*Solanum nigrum*) accumulates acylglucoses and acylinositols in the same tissue.  
22 Detailed *in vitro* biochemistry – cross validated by *in vivo* virus induced gene silencing – revealed  
23 two unique features of the four-step acylglucose biosynthetic pathway: a trichome-expressed,  
24 neofunctionalized invertase-like enzyme, SnASFF1, converts BAHD-produced acylsucroses to  
25 acylglucoses, which in turn are substrates for the first-reported acylglucose acyltransferase,  
26 SnAGAT1. This biosynthetic pathway evolved independently from that recently described in the  
27 wild tomato *S. pennellii*, reinforcing that acylsugar biosynthesis is evolutionarily dynamic with  
28 independent examples of primary metabolic enzyme cooption and additional variation in BAHD  
29 acyltransferases.

30  
31 **Teaser**

32 Analysis of plant protective surface hair chemistry revealed evolutionary mechanisms leading to  
33 metabolic innovation.

34  
35  
36  
37  
38  
39  
40

41 **MAIN TEXT**

42

43 **Introduction**

44 Plants synthesize myriad structurally diverse specialized (historically referred to as  
45 ‘secondary’) metabolites, which provide humans with medicines, food additives and natural  
46 insecticides. In recent years, an increasing number of these compounds were documented to serve  
47 ecological functions. Specialized metabolites group into taxonomically-restricted classes, such as  
48 glucosinolates in Brassicales and benzoxazinoid alkaloids in Poaceae (1–4). Because the full  
49 diversity of specialized metabolites is distributed across the Kingdom, the vast majority of plant  
50 specialized metabolites are uncharacterized. In contrast to the typically conserved enzymes and  
51 pathways of primary metabolism, variation of the lineage-specific specialized metabolic pathways  
52 is observed within and across species (2, 5–7). In fact, specialized metabolic pathway enzymes  
53 have characteristics that promote product diversity. These include promiscuity (seen for example  
54 in BAHD (BEAT, AHCT, HCBT, and DAT) acyltransferases), gene duplication (e.g. cytochromes  
55 P450) and neo- and sub-functionalization of gene expression and enzyme activity.

56 Glandular-secreted trichome acylsugars are a structurally diverse group of specialized  
57 metabolites produced in the nightshade (Solanaceae) family that have developed into an exemplary  
58 system for investigating the emergence and diversification of novel metabolites in plants (8–16).  
59 Their anti-herbivory and anti-microbial activities make them of interest in understanding their  
60 ecological roles and as breeding targets for crop protection (17–20). Most characterized acylsugars  
61 consist of a sucrose, glucose or inositol sugar core esterified at various positions with acyl chains  
62 that are often aliphatic, differing in length – typically C2-C12 (8, 16, 21–29). A single species in  
63 Solanaceae can produce dozens of distinct acylsugars consisting of these simple biosynthetic  
64 building blocks (14, 28).

65 Sugar esters with a sucrose core (acylsucroses) are predominant in Solanaceae (8, 14). The  
66 well-characterized biosynthetic pathway producing cultivated tomato (*Solanum lycopersicum*)  
67 acylsucroses involves four trichome-expressed BAHD-family acylsugar acyltransferases  
68 (ASAT1, ASAT2, ASAT3 and ASAT4) (9–11). Evolutionarily-related ASATs were characterized  
69 in acylsugar biosynthetic pathways in species across the family, with all but one using sucrose or  
70 acylsucroses as acceptor substrate (12–14, 16). These enzymes sequentially transfer acyl chains  
71 from acyl-Coenzyme A substrates (acyl-CoAs) onto specific positions of the sugar core, with  
72 individual ASATs varying in both acyl donor and acyl acceptor substrates. Substrate specificity

73 and promiscuity of these enzymes influence inter- and intra-specific diversification of acyl chain  
74 length and acylation position as reported in *Petunia axillaris*, *Salpiglossis sinuata*, and wild tomato  
75 species (12–14).

76 While the majority of characterized acylsugars are based on sucrose, acylhexoses have also  
77 been described. Specifically, acylglucoses were reported in species within the *Solanum*, *Datura*  
78 and *Nicotiana* genera (21, 27, 29–31), while acylinositols were characterized from the South  
79 American native fruit crop naranjilla (*Solanum quitoense*) and the Central American native  
80 orangeberry nightshade (*Solanum lanceolatum*) (16, 23). Relatively little is reported about  
81 acylhexose biosynthesis, with one published example of a BAHD acylinositol acetyltransferase in  
82 *S. quitoense* (16), and no reported glucose or acylglucose acyltransferases. In fact, we recently  
83 showed that wild tomato *S. pennellii* acylglucoses are produced by acylations of sucrose followed  
84 by conversion to acylglucoses by a trichome-expressed invertase-like enzyme, acylsucrose  
85 fructofuranosidase 1 (SpASFF1) (15). This enzyme utilizes the acylsucrose substrates with all acyl  
86 chains on the pyranose ring (P-type acylsucroses) found in *S. pennellii* but not in cultivated tomato  
87 or other wild tomato relatives. Hence, this ASFF1-dependent pathway evolved independently in  
88 the lineage of *S. pennellii*. This leaves open the question of how acylglucose biosynthesis proceeds  
89 outside the tomato sub-clade of the *Solanum* genus.

90 To address this problem, we investigated trichome acylsugar specialized metabolism in the  
91 predominantly Eurasian black nightshade species, *S. nigrum*. In contrast to the New World species  
92 *S. pennellii*, which produces both acylglucoses and acylsucroses, our previous work suggested that  
93 the trichomes on *S. nigrum* young leaves, stems and fruits exclusively accumulate acylhexoses  
94 (14). Moreover, while other characterized species accumulate acylsugars with three or more acyl  
95 chains, *S. nigrum* accumulates acylhexoses with as few as two acyl chains.

96 Understanding the enzymology behind acylhexose biosynthesis requires accurate  
97 assessment of acylation sites on sugar cores, for which mass spectrometry yields limited  
98 information, but Nuclear Magnetic Resonance (NMR) spectroscopy is well suited. Despite the  
99 power of modern methodologies, obtaining NMR-resolved chemical structures requires samples  
100 of sufficient abundance and purity. As a result, while we have liquid chromatography–mass  
101 spectrometry (LC–MS) data for hundreds of structurally diverse acylsugars, only a subset have  
102 unambiguous structure annotations. For example, of more than 38 surveyed Solanaceae species

103 that accumulate acylsugars, fewer than half have NMR structures elucidated for at least one  
104 acylsugar (14, 16, 21–26, 28, 29).

105 Here we report the structural characterization of *S. nigrum* acylhexoses – consisting of  
106 triacylinositols, diacylglucoses and triacylglucoses – and describe characterization of the *S. nigrum*  
107 acylglucose biosynthetic pathway. Our accelerated structure elucidation pipeline provided NMR-  
108 resolved structures for *S. nigrum* acylsugars from leaf-surface extracts without purifying individual  
109 compounds. A combination of *in vitro* biochemical pathway reconstruction and *in vivo* virus-  
110 induced gene silencing (VIGS) validated the acylglucose biosynthetic pathway. This pathway  
111 consists of four trichome-expressed enzymes. The two acylsucrose acyltransferases SnASAT1 and  
112 SnASAT2 produce diacylsucroses, which serve as substrates for an acylsucrose fructofuranosidase  
113 1 (SnASFF1), which synthesizes diacylglucoses. Triacylglucoses are then produced by SnAGAT1.  
114 While it is analogous to the *S. pennellii* acylglucose pathway, the *S. nigrum* pathway evolved  
115 independently, with co-option of the neofunctionalized SnASFF1 from a distinct lineage of the  
116 invertase gene phylogeny, and evolution of a BAHD acyltransferase that acts on acylglucoses.  
117 This work demonstrates the value of leveraging analytical chemistry, phylogenetics, enzymology  
118 and knowledge gained from model organisms to facilitate chemical structure assignment and  
119 biochemical pathway elucidation in a non-model organism.

120

## 121 **Results**

### 122 ***S. nigrum* accumulates di- and triacylated acylglucoses and triacylated acylinositols**

123 Understanding the atomic connections of products and metabolic intermediates is critical  
124 for biochemical pathway elucidation. NMR-resolved structures of purified compounds are the gold  
125 standard for small molecule metabolites, but obtaining these data can be time-consuming. We  
126 sought to speed up the process by subjecting total extract or partially purified mixtures to 2D NMR  
127 analyses, taking advantage of previously developed acylsugar analysis methods (28, 29, 32) (Fig.  
128 1C).

129 As a first step to characterize the number and diversity of acylsugars, we profiled  
130 metabolites in *S. nigrum* leaf-dip extracts using LC-MS (Fig. 1A). We annotated 99 metabolite  
131 features – among them 45 with high confidence based on criteria discussed in the Supplementary  
132 Method – with characteristics similar to known acylsugars based on molecular ion adduct masses,  
133 mass spectra at elevated collision energies and fractional hydrogen content as quantified by relative



134 mass defect (32, 33) (Fig. 1A, Fig. S1 and S2, Table S1 and Supplementary Text). In contrast to  
135 the majority of Solanaceous plants, we only detected acylhexoses in *S. nigrum* extracts (14). LC-  
136 MS fragmentation patterns revealed that the acylsugars are typically composed of hexose cores  
137 and two or three short- (C2, C4, C5) or medium-chain length (C8, C9, and C10) acyl esters (Table  
138 S1 and Supplementary Text). Thirty-nine of the 45 high-confidence putative acylsugars showed  
139 fragmentation patterns similar to previously analyzed *S. pennellii* acylglucoses (29). However, we  
140 observed six triacylhexoses with unusually low fragment ion signals in negative mode (Fig. S2);  
141 this is a characteristic reminiscent of *S. quitoense* acylinositols (16, 34).

142 The acylglucose- and acylinositol-like peaks in *S. nigrum* appear as groups of two or more  
143 chromatographic peaks sharing identical molecular masses and indistinguishable mass spectra at  
144 high collision energy as consistent with multiple isomeric forms (Fig. S3). Extracted ion  
145 chromatograms for fragment ion masses characteristic of acyl groups (carboxylate anions)  
146 revealed that many individual chromatographic peaks result from multiple co-eluting metabolite  
147 features, some of which present indistinguishable mass spectra. For example, the second-eluting  
148 peak annotated as H3:16 (Fig. S3) exhibits asymmetry suggestive of four isomers, two of which  
149 overlap in chromatographic retention. All four components share the same acyl chain complements  
150 – C2, C4 and C10 acyl chains on a hexose core as evidenced from the extracted fragment ion  
151 chromatograms that confirm C4 and C10 acyl groups (Fig. S3). We expect each acylglucose to  
152 resolve as two peaks corresponding to  $\alpha$  and  $\beta$  anomers that interconvert, accounting for the  
153 presence of two peaks for each (29). The observation of additional peaks led to the hypothesis that  
154 four isomeric forms reflected different acyl chain branching patterns rather than differences in acyl  
155 group lengths or positions of esterification. This is supported by the ethyl ester profile revealed by  
156 gas chromatography-MS (GC-MS) after saponification and transesterification (Fig. 1B). The ethyl  
157 ester profile demonstrated both abundant straight (nC8, nC9, nC10) and branched (iC4, iC5, aiC5,  
158 branched C8, branched C9, branched C10) aliphatic chains (Fig. 1B), supporting the conclusion  
159 that acyl chain branching variation contributes to the number of structural isomers.

160 The combined information gained from LC-MS and GC-MS led us to conclude that *S.*  
161 *nigrum* accumulates at least 45 different types of di- and triacylhexoses including structural  
162 isomers with acyl chains differing in branching patterns. While unequivocal structural information  
163 of these acylhexoses is essential for a complete understanding of their biosynthesis, the  
164 chromatography-based analytical techniques do not provide needed resolution or selectivity. For

165 example, MS has not yet developed technologies that identify acylation positions or differentiate  
166 isomeric hexose cores (e.g. glucose or inositol). Such information is central to understanding  
167 functions of key metabolic enzymes that shape acylsugar chemical diversity. We employed NMR  
168 spectroscopy, which provides important information about molecular topology, to obtain these  
169 structural details.

170 We sought to avoid the time-consuming process of purifying metabolites to homogeneity  
171 by analyzing unfractionated and partially purified fractions (Fig. 1C). This took advantage of the  
172 2D NMR spectroscopy methods Heteronuclear Single Quantum Coherence (HSQC), which  
173 provides information about hydrogen-carbon attachments, and Heteronuclear Multiple Bond  
174 Correlation (HMBC), which yields information about atoms separated by 2-3 bonds. Analysis of  
175 the total, unfractionated acylsugar extracts from young plants revealed the dominant presence of a  
176 glucose backbone with acyl chains at the 2-, 3- and 4-positions (Fig. 1D). However, abundant  
177 triacylglucoses obscured the signals of diacylglucoses and acylinositols in the total extract: we  
178 employed partial purification to obtain similar information about these less abundant acylsugars.

179 Silica gel chromatography was used to separate triacylglucoses (fraction 1) from  
180 diacylglucoses and triacylinositols (fraction 2) based largely on the number of hydroxyl groups:  
181 there are two hydroxyls on triacylglucoses; three on diacylglucoses and triacylinositols (Fig. 2A-  
182 C). Analysis of the NMR spectra from fraction 1 confirmed that it predominantly contains  
183 triacylglucoses with one medium-length (8-10 carbon) acyl chain esterified to the 4-position, a  
184 short (4-5 carbon) acyl chain at the 3-position, and an acetyl (C2) group at the 2-position (Fig. 2D  
185 and Table S2). In agreement with LC-MS data, NMR spectra of fraction 2 exhibited signals of two  
186 distinct groups of acylhexoses in the sugar region ( $\delta_H = 3-6$  ppm;  $\delta_C = 60-100$  ppm) (Fig. S4). The  
187 anomeric positions in hexoses stand out in having larger (downfield)  $^{13}C$  chemical shifts ( $\delta_C \sim 90-$   
188  $100$  ppm) than other acylsugar carbon atoms (Fig. S4). We employed 2D HSQC-TOtal Correlation  
189 Spectroscopy (HSQC-TOCSY), which generates spectra at long mixing times to provide  
190 connectivity information between coupled nuclei in a molecule (35). Such information aids in  
191 associating sugar core hydrogen and carbon signals within a molecule and distinguishing signals  
192 from other molecules in a mixture. This approach provided a useful strategy for distinguishing  
193 acylation positions on acylglucoses and acylinositols in fraction 2 where signals often overlap. Our  
194 analysis revealed acylations at the 3- and 4-positions on a sugar core with an anomeric center  
195 (glucose) and acylations at 2-, 3-, and 4- positions on a hexose core with no anomeric center

196 (inositol) (Fig. 2E and Fig. S4). HMBC data analysis confirmed the presence of abundant  
197 diacylglucoses with a medium-length acyl chain as R<sub>4</sub> and a short acyl chain as R<sub>3</sub> (Fig. 2F and  
198 Table S3). This approach also revealed the presence of triacylinositols with two short- and one  
199 medium-length acyl chain as R<sub>2</sub>, R<sub>3</sub> and R<sub>4</sub> (Fig. 2G and Table S4).

200 Analysis of the combined LC-MS, GC-MS and NMR results led to the conclusion that *S.*  
201 *nigrum* accumulates diacylglucoses esterified at the 3- and 4-positions, with triacylglucoses and  
202 triacylinositols esterified at the 2-, 3-, and 4- positions. For the remainder of this report we follow  
203 the nomenclature established in Schillmiller et al. (2010) to describe these compounds:  
204 SX:Y(A<sup>a</sup>,B<sup>b</sup>,C<sup>c</sup>), in which **S** indicates the type of sugar core (**G** for glucose, **I** for inositol), **X** is the  
205 total number of substituting acyl chains, **Y** signifies the sum of acyl chain carbons and (A<sup>a</sup>,B<sup>b</sup>,C<sup>c</sup>)  
206 represents the number of carbons of each chains with the superscript documenting the site of  
207 substitution. Based on this nomenclature, G2:14(4<sup>R3</sup>,10<sup>R4</sup>), G3:16(2<sup>R2</sup>,4<sup>R3</sup>,10<sup>R4</sup>), and  
208 I3:17(4<sup>R4</sup>,5<sup>R2</sup>,8<sup>R3</sup>) represent some of the most abundant acylsugars in each class (Fig 2 D, F and  
209 G). In cases where the identity of the hexose core remains ambiguous, the letter **H** for hexose is  
210 employed.

211

## 212 **Identification of a trichome-expressed β-fructofuranosidase involved in *S. nigrum* acylsugar** 213 **biosynthesis**

214 The observation that acylglucoses are predominant in *S. nigrum* trichome extracts led us to  
215 posit that, as previously shown for *S. pennellii* LA0716 acylglucose biosynthesis, acylsucroses are  
216 intermediates in acylglucose production. To test the hypothesis, we identified trichome-expressed  
217 transcripts in *S. nigrum* predicted to encode proteins of the glycoside hydrolase family 32, which  
218 includes SpASFF1. Twenty invertase-like homologs were identified by BLAST from *S. nigrum*  
219 RNAseq data (Fig. S5A). We reasoned that – as acylsugars appear to accumulate on *S. nigrum*  
220 trichome tip cells (Fig. S5B) – the acylglucose biosynthetic genes in *S. nigrum* would be highly  
221 expressed and enriched in trichomes. Among the twenty homologs, six demonstrate trichome-  
222 enriched expression (Fig. S5C). Five of the six have sequence lengths comparable to functional  
223 invertases, and have WXNDPNG, RDP and EC sequences characteristic of β-fructofuranosidases  
224 (Fig. S5D). Because we previously observed a **PSTP** non-canonical substrate binding site in  
225 SpASFF1(15), we sought invertase-like sequences also lacking the canonical **DXXXK** in *S. nigrum*  
226 trichome expressed transcripts. Indeed, assembly c70979\_g1 has **PLTY** in place of that conserved

227 substrate binding site (Fig. S5D). Based on the *in vivo* transient silencing and *in vitro* enzyme  
228 activities results described below, we designated this protein SnASFF1.

229 We developed and deployed *S. nigrum* VIGS to test the hypothesis that SnASFF1 is  
230 involved in *S. nigrum* acylglucose biosynthesis *in vivo*. Plants with silenced *SnASFF1* accumulated  
231 diacylsucroses (referred to as ‘*in vivo* diacylsucroses’ below) that were not detected in the control  
232 plants (Fig. 3, Fig. S5E and F and Table S5). NMR spectra of the early- and late-eluting  
233 S2:14(4,10) isomers revealed that the acylation positions – on positions 3 and 4 (Fig. S5G) – mirror  
234 those of *S. nigrum* acylglucoses (Fig. 2D and F), supporting their role as intermediates in the  
235 acylglucose biosynthetic pathway. As characterized ASATs show acylation position specificity,  
236 this result is consistent with the hypothesis that there are two or more BAHD acyltransferases that  
237 produce diacylsucrose substrates for this SnASFF1 invertase-like enzyme.

238

### 239 **Identification of trichome-specific BAHD acyltransferases**

240 Based on published results with acylsucrose- and acylinositol-producing plants in  
241 Solanaceae, we hypothesized that acyltransferase enzymes of *S. nigrum* acylsugar biosynthesis  
242 would be trichome-enriched and evolutionarily related to characterized ASATs (14, 16). The  
243 combined tissue-specific expression and homology-guided approach led us to consider six highly  
244 trichome-enriched BAHD family members in the *S. nigrum* transcriptome (Fig. 4A and Fig. S6).  
245 These candidates are predicted to encode proteins with characteristics of active BAHD family  
246 enzymes (36). First, they have the conserved HXXXD catalytic motif and the DFGWG-like  
247 structural motif (Fig. S7). Second, the predicted proteins all have lengths comparable to  
248 characterized functional BAHDs (8–16) (Fig. S6B).

249 We tested the hypothesis that these genes encode proteins of acylsugar biosynthesis by  
250 examining the activities of *Escherichia coli*-expressed and His-tag purified enzymes. C10, C8,  
251 iC5, iC4 and C2-CoAs were chosen as acyl chain donors in our *in vitro* assays, based on the  
252 abundance of these ester groups in our structural annotations (Fig. 1B). Using LC-MS, activity was  
253 detected with sucrose and the closest *S. nigrum* homolog of tomato ASAT1 (SlASAT1), which is  
254 encoded by the transcript *c63608\_g1* (Fig. 4B and Fig. S8). This enzyme catalyzes the formation  
255 of monoacylsucroses – S1:8 and S1:10 – from sucrose and nC8, iC10 and nC10 acyl-CoAs (Fig.  
256 4B and Fig. S8). The apparent  $K_m$  values for SnASAT1 and nC8- and nC10-CoAs are  $114 \pm 21$   
257 and  $11.7 \pm 2.1$  ( $\mu\text{M}$ ), respectively (Fig. S9A). An apparent  $K_m$  of 5 mM was measured for SnASAT1

258 and the acceptor substrate sucrose (Fig. S9A). Based on its *in vitro* activity and the *in planta* results  
259 presented below, we named this enzyme SnASAT1. SnASAT1-produced S1:10(nC10) co-eluted  
260 with SlASAT1-produced S1:10(nC10<sup>R4</sup>) but not with SsASAT1-produced S1:10(nC10<sup>R2</sup>) (Fig.  
261 S9B) (10, 11, 13, 14). Positive-mode MS fragmentation supports localization of the C10 chain on  
262 the six-member pyranose ring (Fig. S9C). This result was extended by NMR analysis, revealing  
263 S1:10(nC10<sup>R4</sup>) as the major product of SnASAT1 *in vitro* enzyme assays (Fig. 4E and Fig. S9D).

264 A second, chromatographically separable S1:10 isomer, S1:10(10<sup>R6</sup>), accumulated in  
265 SnASAT1 enzyme assays (Fig. S10A and S9D). This 6-position acylated isomer appeared as a  
266 minor product in assays carried out at pH 6.0 with short incubation periods (5-30 min) (Fig. S10A).  
267 The concentration of this second isomer increases after extended incubation time, especially under  
268 neutral-to-alkaline pH conditions (Fig. S10B-D). For example, comparable amounts of  
269 S1:10(10<sup>R4</sup>) and S1:10(10<sup>R6</sup>) accumulated after 30 min at 30°C under pH 8.0 (Fig. S10C). We also  
270 observed non-enzymatic conversion of S1:10(10<sup>R4</sup>) to S1:10(10<sup>R6</sup>) after brief exposure to elevated  
271 temperature (65°C) (Fig. S10B and D) or extended incubation of purified S1:10(10<sup>R4</sup>) in  
272 unbuffered distilled water at room temperature. Non-enzymatic chain migration was previously  
273 documented for a R<sub>4</sub> monoacylsucrose produced by SlASAT1, where the short acyl chain moved  
274 from R<sub>4</sub> to R<sub>6</sub> (11).

275 We characterized the activity of trichome-expressed *c65670\_g1*-encoded SnASAT2, the  
276 closest homolog of tomato SlASAT2 and SpASAT2 (Fig. 4A). SnASAT2 utilized iC4-CoA as  
277 acyl-chain donor to decorate a second ring position on the pyranose ring of both S1:10(nC10<sup>R4</sup>)  
278 and S1:10(iC10) (Fig. 4CD and Fig. S11A). MS fragmentation patterns and retention times of the  
279 produced S2:14(iC4,iC10) and S2:14(iC4,nC10) (referred to below as ‘*in vitro* diacylsucroses’)   
280 were indistinguishable from the early- and late-eluting *in vivo* S2:14(4,10) metabolites,  
281 respectively (Fig. 4D and Fig. S11). We observed broad acyl donor and acceptor substrate  
282 specificity with iC4-, iC5- and nC8- serving as substrates with both S1:10(10<sup>R4</sup>) and S1:8(8)  
283 acceptors, producing diacylsucroses chromatographically indistinguishable from those detected in  
284 invertase-like deficient VIGS-*SnASFF1* lines (Fig. 4E and Fig. S12A). In contrast, no products of  
285 SnASAT2 were detected with unacylated sucrose, glucose, the SsASAT1 product S1:10(10<sup>R2</sup>), or  
286 the S1:10(10<sup>R6</sup>) SnASAT1 rearrangement product as acceptor (Fig. S12B-D). As seen with  
287 SnASAT1-generated monoacylsucroses, a second diacylsucrose isomer accumulated in a pH- and  
288 time-dependent manner after SnASAT1 + SnASAT2 reaction (Fig. S13). Together with the

289 identification of SnASFF1, these results are consistent with the hypothesis that S2:14(4,10) from  
290 SnASAT1 + SnASAT2 sequential reactions are precursors of the *S. nigrum* di- and triacylglycerols  
291 (e.g. G2:14(4<sup>R3</sup>,10<sup>R4</sup>) and G3:16(2<sup>R2</sup>,4<sup>R3</sup>,10<sup>R4</sup>)).

292

### 293 **SnASFF1 is an acylsucrose hydrolase that evolved independently from SpASFF1**

294 We tested SnASFF1 protein activity on *in vitro*- and *in vivo*-produced diacylsucroses, using  
295 recombinant His-tagged SnASFF1 protein expressed and purified from the *Nicotiana benthamiana*  
296 transient expression system(15). Indeed, SnASFF1 hydrolyzed all three tested diacylsucroses: the  
297 two *in vivo* pathway intermediates and the unrearranged *in vitro* diacylsucrose product generated  
298 by SnASAT1 and SnASAT2 sequential reactions (Fig. 5A and Fig. S14A). The reactions with *in*  
299 *vitro* and *in vivo* S2:14(4,10) isomers each yielded two major products that are the anomers of *S.*  
300 *nigrum* G2:14(4<sup>R3</sup>,10<sup>R4</sup>), as suggested by their identical retention times and mass spectra (Fig. 5A  
301 and Fig. S14B). In fact, the G2:14(4,10) isomers produced from *in vitro* S2:14(iC4,nC10) and *in*  
302 *vivo* late-eluting S2:14(4,10) are indistinguishable from the late-eluting anomers of *S. nigrum*  
303 G2:14(4<sup>R3</sup>,10<sup>R4</sup>). Additionally, SnASFF1 converted the *in vivo* early-eluting S2:14(4,10) into  
304 anomers co-eluting with those of the early-eluting *S. nigrum* G2:14(4<sup>R3</sup>,10<sup>R4</sup>) (Fig. 5A and Fig.  
305 S14B). We hypothesize that these two sets of diacylglycerols, differing in an nC10 or iC10 acyl  
306 chain as R<sub>4</sub>, collectively explain the overlapping signals of *S. nigrum* G2:14(4<sup>R3</sup>,10<sup>R4</sup>) (Fig. 5A).  
307 This result is consistent with the presence of abundant nC10 and iC10 in the acylsugar-derived  
308 ethyl ester profile (Fig. 1B). Taken together, these results provide strong evidence that SnASAT1,  
309 SnASAT2 and SnASFF1 are sufficient to reconstitute production of diacylglycerols produced in *S.*  
310 *nigrum* from sucrose and acyl-CoAs.

311 SnASFF1 hydrolytic activity was not detected using sucrose, in contrast to the canonical  
312 yeast invertase activity (Fig. S15A). Conversely, yeast invertase failed to use any tested  
313 S2:14(4,10) as substrate (Fig. S15B). These data are consistent with the hypothesis that SnASFF1  
314 has acylsucrose-specific activity. We also observed SnASFF1 hydrolytic activity with *in vitro*-  
315 produced S1:10(10<sup>R4</sup>) and the *S. pennellii* triacylsucrose S3:18(4<sup>R2</sup>,4<sup>R4</sup>,10<sup>R3</sup>) as substrate (Fig.  
316 S15B). However, the monoacylglycerol product, G1:10(10), does not appear to be an acceptor  
317 substrate for SnASAT2 with nC10-, nC8-, iC5-, iC4- and acetyl-CoA (Fig. S12A). Taken together,  
318 the results support the hypothesis that SnASFF1 is an acylsucrose hydrolase that contributes to *S.*  
319 *nigrum* acylglucose biosynthesis by converting diacylsucroses to diacylated glycerols.



320 To explore the evolution of acylglucoses in *S. nigrum* and wild tomato, we generated a  
321 gene tree with invertase-like genes and transcripts from *S. lycopersicum*, *S. pennellii* and *S. nigrum*  
322 (Fig. 6). Phylogenetic analysis showed that the *S. nigrum ASFF1* is a close homolog of the tomato  
323 *LIN5* (Solyc09g010080) and *LIN7* (Solyc09g010090) paralogs – tandem duplicates of sucrose-  
324 specific invertases. In contrast, the *S. pennellii ASFF1* is in a clade distinct from *SnASFF1*, with  
325 greater similarity to tomato Solyc03g121680 and Solyc06g064620 and the two *S. nigrum*  
326 transcripts, *c65240\_g1* and *c62944\_g1*. We observed no acylsugar phenotype upon *in planta*  
327 silencing *c65240\_g1*, the closest BLAST hit of SpASFF1 in *S. nigrum* transcriptome (Fig. S15B).  
328 This result is consistent with the low *S. nigrum* trichome expression of *c65240\_g1*. Together, these  
329 relationships indicate that the acylsugar hydrolyzing activity of SnASFF1 and SpASFF1 evolved  
330 independently in *S. nigrum* and the wild tomato, *S. pennellii*.

331

### 332 **Identification of a trichome-specific BAHD acylglucose acetyltransferase**

333 The *in vitro* production of diacylglucoses by sequential reaction of SnASAT1, SnASAT2  
334 and SnASFF1 is consistent with the hypothesis that the acetylation step leading to *S. nigrum*  
335 triacylglucoses is carried out on diacylglucose substrates. Indeed, the search among the remaining  
336 trichome-enriched ASAT candidates led to identification of acetylation by SnAGAT1 (*S. nigrum*  
337 **acylglucose acyltransferase 1**; encoded by *c65306\_01*), as the last step of triacylglucose  
338 biosynthesis in *S. nigrum*.

339 As hypothesized, SnAGAT1 acetylated the diacylglucoses produced by SnASFF1  
340 activities with *in vitro* and *in vivo* diacylsucrose S2:14(4,10) substrates (Fig. 5B). The  
341 G3:16(2,4,10) anomers obtained from both *in vitro* S2:14(iC4,nC10) and *in vivo* late-eluting  
342 S2:14(4,10) have retention times and mass spectra identical to the late-eluting peaks of *S. nigrum*  
343 G3:16(2<sup>R2</sup>,4<sup>R3</sup>,10<sup>R4</sup>) (Fig. 5B and Fig. S16A). SnASFF1 and SnAGAT1 sequential activities with  
344 *in vivo* early-eluting S2:14(4,10) – which shares identical retention times and mass spectra with *in*  
345 *vitro* generated S2:14(iC4,iC10) – generated early-eluting triacylglucose anomers (Fig. 5B and  
346 Fig. S16A). We hypothesize that these two sets of triacylglucoses, with an nC10 or iC10 chain,  
347 collectively explain the multiple peak signals of *S. nigrum* G3:16(2<sup>R2</sup>,4<sup>R3</sup>,10<sup>R4</sup>) (Fig. 5B and Fig.  
348 S3). This result is consistent with the abundance of nC10 and iC10 acyl chains on *S. nigrum*  
349 acylsugars (Fig. 1B). We also observed SnAGAT1 activity with the diacylglucose-rich *S. nigrum*  
350 extract fraction 2 as acceptor substrates and acetyl-CoA as donor, leading to accumulation of



351 triacylglycerols that are indistinguishable to *S. nigrum* triacylglycerols (Fig. S16C). These assays  
352 provide strong evidence that SnAGAT1 catalyzes the last step in *S. nigrum* triacylglycerol  
353 production (Fig. 5C).

354

### 355 ***In vitro* validation of the *S. nigrum* acylglucose biosynthetic pathway**

356 We independently assessed the functions of the three BAHD enzymes on the reconstructed  
357 pathway by taking advantage of BAHD acyltransferase reversibility in the presence of free  
358 coenzyme A. Using plant-derived acylglucosyls as substrates for reverse enzyme assays, we  
359 verified that SnAGAT1 and free coenzyme A converts *S. nigrum* extract fraction 1 triacylglycerols  
360 into diacylglycerols (Fig. 7A). The ion masses and mass spectra of these diacylglycerols are  
361 consistent with loss of an acetyl group (Fig. S16B), supporting the designation of SnAGAT1 as an  
362 acyltransferase (Fig. 5C and 7B).

363 SnASAT2 was tested for reverse activity with both early- and late-eluting *in vivo*  
364 S2:14(4,10) from VIGS-*SnASFF1* lines and the major and minor SnASAT1 + SnASAT2 *in vitro*-  
365 generated S2:14(iC4,nC10) isomers (Fig. 7C). SnASAT2 converted the *in vivo*-derived and the  
366 major *in vitro*-produced diacylsucroses to monoacylsucroses S1:10(10) (Fig. 7C). The  
367 monoacylsucroses produced from both *in vitro* S2:14(iC4,nC10) and *in vivo* late-eluting  
368 S2:14(4,10) are chromatographically indistinguishable from the SnASAT1-forward reaction  
369 product S1:10(nC10<sup>R4</sup>) (Fig. 7C). Addition of SnASAT1 to either of the SnASAT2 reverse  
370 reaction assays reduced the accumulation of S1:10(10) (Fig. 7C). In contrast, no reverse activity  
371 was detected using the minor *in vitro* diacylsucrose rearrangement product as substrate (Fig. 7C).  
372 Similarly, reverse assays using *in vitro*-generated monoacylsucroses as substrates revealed  
373 SnASAT1 enzymatic activity with S1:10(10<sup>R4</sup>), but not with the S1:10(10<sup>R6</sup>) rearrangement  
374 product (Fig. S17). Together, these data provide independent evidence for the *S. nigrum*  
375 acylglucose biosynthetic pathway, with SnASAT1, SnASAT2, SnASFF1 producing  
376 diacylglycerols, and SnAGAT1 catalyzing the final step in triacylglycerol biosynthesis (Fig. 7B).

377

### 378 **VIGS validation of three acyltransferases in *S. nigrum* acylglucose biosynthesis**

379 We deployed VIGS to test the hypothesis that SnASAT1, SnASAT2 and SnAGAT1  
380 activities are necessary for *in vivo* acylglucose biosynthesis (Fig. 8). As expected for early steps in  
381 the core acylsugar biosynthetic pathway, silencing *SnASAT1* and *SnASAT2* each led to reduction

382 of the four most abundant di- and triacylglucoses (Fig. 8A and B, Fig. S18A and B and Table S6  
383 and S7). Silencing SnAGAT1 caused statistically significant increases in the ratio of  
384 diacylglucoses to corresponding triacylglucoses relative to the controls (Fig. 8C, Fig. S18C and  
385 Table S8). These results provide strong support that di- and triacylglucoses are produced *in vivo*  
386 via the three- and four-step biosynthetic pathway demonstrated through *in vitro* biochemistry,  
387 respectively (Fig. 7B).

388

## 389 **Discussion**

390 While evolutionary diversification occurs by relatively simple mechanisms of gene  
391 duplication, changes in gene expression, and modification of gene product activities, the resulting  
392 phenotypic diversity is remarkable. Plant specialized metabolism is a poster child for how a matrix  
393 of a relatively small number of chemical feedstocks – generally from core metabolism – and varied  
394 enzyme classes, lead to hundreds of thousands of metabolites of diverse structure and function.  
395 The sheer number and structural variety of these compounds presents challenges for the structural  
396 elucidation essential for rigorous metabolic pathway dissection. Conversely, the ability to use *in*  
397 *vitro* pathway reconstruction to test hypotheses regarding pathway evolution is a strength of evo-  
398 metabolism.

399 Acylsugar metabolism has become an exemplary system for understanding both the general  
400 principals and specific mechanisms by which enzymes are repurposed and combined to generate  
401 phenotypic diversity. Here we describe three characteristics of *S. nigrum* acylsugar diversity and  
402 metabolism not previously reported for other species. First, although only acylhexoses were  
403 detected, they include a mixture of both inositol and glucose esters (Fig. 1 and 2). Second, an  
404 **acylglucose** acyltransferase is involved in making triacylglucoses (Fig. 5). Finally, the acylglucose  
405 pathway intermediates are produced from a neofunctionalized invertase, which evolved  
406 independently from the recently reported wild tomato SpASFF1 triacylsucrose  $\beta$ -fructofuranosidase  
407 (Fig. 5 and 6). This work was facilitated by integration of LC- and GC-MS combined with 2-D  
408 NMR methods, bypassing a requirement for metabolite purification (Fig. 1).

409

## 410 **Integrative approaches to elucidate the *S. nigrum* acylglucose biosynthetic pathway**

411 We present four lines of evidence that *S. nigrum* di- and triacylglucoses are synthesized by  
412 SnASFF1 and SnAGAT1 from the diacylsucrose intermediates produced by sequential reactions  
413 of SnASAT1 and SnASAT2. First, we reconstructed the biosynthetic pathway *in vitro* using

414 purified enzymes, sucrose and acyl-CoAs (Fig. 4 and 5). The acylglucoses generated are  
415 chromatographically indistinguishable from those observed in *S. nigrum*, while intermediates of  
416 the reconstructed pathway have acylation positions consistent with the *in vivo* final products.  
417 Second, genetic evidence supports the involvement of these enzymes in *S. nigrum* acylglucose  
418 biosynthesis (Fig. 3 and 8): VIGS silencing of the BAHD acyltransferases *SnASAT1* and *SnASAT2*  
419 reduces total acylglucoses, *SnAGAT1* reduces total triacylglucoses, while *SnASFF1* silencing  
420 causes accumulation of diacylsucrose pathway intermediates. Third, we cross-validated that the  
421 major *in vitro* diacylsucrose intermediates produced by the reconstructed pathway behave  
422 chromatographically and biochemically identically to *in vivo* diacylsucrose intermediates purified  
423 from VIGS-*SnASFF1* lines (Fig. 4D, 5 and 7C). Notably, SnASFF1 converted both *in vivo* and *in*  
424 *vitro* synthesized diacylsucroses to diacylglucose products that can be converted to triacylglucoses  
425 by SnAGAT1. In addition, both the di- and triacylglucose anomers produced are indistinguishable  
426 from those extracted from *S. nigrum*. While this biochemical and genetic evidence provided strong  
427 support for the reconstructed pathway, the observation of mono- and diacylated *in vitro*  
428 rearrangement products under pH >6 and elevated temperature (Fig. S10 and S13) led us to seek  
429 a fourth line of evidence for pathway validation using reverse BAHD assays.

430 We compared reverse enzymatic products of *in vitro* and *in vivo* intermediates to verify the  
431 relevance of all the *in vitro*-produced intermediates. SnASAT2-reverse activity deacylates the *in*  
432 *vivo* – and major *in vitro* – diacylsucroses to monoacylsucroses that are indistinguishable from  
433 those obtained from SnASAT1 forward assays. All of these monoacylsucrose products are  
434 substrates for SnASAT1 reverse activities, supporting the hypothesis that SnASAT1 acylates at  
435 the 4-position. The lack of SnASAT2 reverse enzyme activity with *in vitro* minor diacylsucrose is  
436 consistent with the hypothesis that the rearranged product is not a biosynthetic intermediate. This  
437 result is consistent with NMR analysis suggesting that the 6-position acylation of the medium-  
438 length chain on the minor monoacylsucrose products is not observed on *S. nigrum* acylglucoses.  
439 Hence, we conclude that the minor *in vitro* artifacts are not intermediates of the *S. nigrum*  
440 acylglucose biosynthetic pathway, despite their similar – but not identical – retention times and  
441 mass spectra.

442 The reverse activity also enabled us to facilitate pathway discovery. Using abundant plant-  
443 derived products, we discovered the first reported acylglucose acyltransferase, SnAGAT1, acting  
444 as the last step in *S. nigrum* triacylglucose biosynthesis (Fig. 7A). This acetyltransferase activity

445 was later verified by forward enzyme assays with acetyl-CoA and *in vitro* diacylglucoses produced  
446 by the multistep – SnASAT1 + SnASAT2 + SnASFF1 – reactions (Fig. 5B). SnAGAT1 is the third  
447 phylogenetically related acetyltransferase in acylsugar biosynthesis, falling in the same BAHD  
448 cluster with tomato SlASAT4, *S. quitoense* TAIAT and *S. sinuata* SsASAT5 (Fig 3A). Deploying  
449 BAHD reverse enzyme assays accelerated SnAGAT1 identification and allowed *in vitro* pathway  
450 reconstruction in the non-model species. In fact, the *S. nigrum* acylglucose biosynthetic pathway  
451 is the first completely *in vitro* reconstructed acylhexose pathway in a non-model organism without  
452 the powerful genetic resources that enabled the discovery of *S. pennellii* acylglucose biosynthetic  
453 pathway.

454

### 455 **Convergent evolution of acylsucrose hydrolyzing enzymes**

456 Phylogenetic analysis of SnASFF1 and restricted accumulation of acylhexoses across the  
457 Solanaceae is consistent with the hypothesis that acylglucose production arose independently in  
458 the Old World black nightshade *S. nigrum* and New World wild tomato *S. pennellii* (Fig. 6). One  
459 strong line of evidence is that the two ASFF enzymes are members of different clades within the  
460  $\beta$ -fructofuranosidase gene tree (Fig. 6). Second, SpASFF1 – and synthesis of its P-type  
461 triacylsucrose substrates (15) – are restricted within a subclade of the tomato Solanum group (12),  
462 consistent with this being a derived trait within the New World Solanum. The independent  
463 evolution of acylhexose biosynthesis raises the intriguing question of whether there are phenotypic  
464 advantages of producing acylsugars with a glucose core. Similarly, the observation of mixed  
465 acylsucroses and acylglucoses in *S. pennellii*, and mixed acylglucose and acylinositols in *S. nigrum*  
466 begs the question of whether there are synergistic effects of acylglucoses with other acylsugars.

467 Despite co-option from distinct lineages, the two independently evolved ASFFs are both  
468 trichome-enriched, neofunctionalized GH32  $\beta$ -fructofuranosidases, which lack the canonical  
469 **DDTK** sucrose-binding pocket of Arabidopsis Cell-Wall Invertase 1 (ACWINV1; AT3G13790)  
470 (37–39) (Fig. S4). This is consistent with the observation that neither of the ASFFs utilize un-  
471 acylated sucrose as substrate (15) (Fig. S12C). In addition, both ASFFs are expressed in the same  
472 tip cells as their acylsucrose substrates (15, 40). It will be interesting to learn whether invertase-  
473 like enzymes evolved to produce the acylglucoses reported in *Datura* and *Nicotiana* species (21,  
474 22). The diversity of apparent *in vivo* substrates for both ASFFs – diacylsucroses for SnASFF1

475 and triacylsucroses for SpASFF1 – also present opportunities for enzyme structure and function  
476 analysis.

477

### 478 **Streamlined analytical approaches for metabolite annotation**

479 It is remarkable that we continue to discover metabolic variations as new Solanaceae  
480 species are analyzed. Because biosynthetic pathway dissection requires knowledge of product and  
481 intermediate structures, this process can be a bottleneck. We developed a structural analysis  
482 pipeline that reduces the cost and time involved in sample purification. The presence of three  
483 distinct acylhexose classes – di- and triacylglucoses and triacylinositols – in *S. nigrum* presented  
484 a challenging case study for this integrative approach. We designed the pipeline to leverage the  
485 substantial chemical shift library assembled from acylsugar studies in other Solanaceous plants  
486 (10, 11, 13, 29, 34, 41).

487 While the pipeline performed as expected for the most abundant triacylsugars in *S. nigrum*,  
488 the many overlapping NMR signals in total trichome acylsugar extracts led us to perform partial  
489 purification using silica gel chromatography. We obtained clear signals of *S. nigrum*  
490 triacylglucoses from the less polar fraction, while 2D HSQC-TOCSY successfully separated  
491 proton correlation signals from diacylglucoses and triacylinositols in the high polarity fraction.  
492 With the simple partial purification, our NMR approach provided sufficient information to address  
493 key characteristics of the enzymes involved in acylsugar biosynthesis without the need to purify  
494 individual compounds: (1) recognition of different acylated sugar cores in mixtures and (2)  
495 assignments of ester linkage positions on sugar cores. This approach extends the use of 2D  $^1\text{H}$ - $^{13}\text{C}$   
496 HSQC NMR spectra beyond previously published characterization of lignin structures (42).  
497 Limiting the need for purification is particularly beneficial for investigating anomers and isomers  
498 differing in acyl chain branching patterns, where overlapping retention times can frustrate attempts  
499 at large-scale purification to homogeneity. As acylsugars are sporadically found in Martyniaceae,  
500 Rosaceae, Geraniaceae, Caryophyllaceae and Brassicaceae plants, our approach can further assist  
501 with large scale screening for sugar esters beyond Solanaceae (43–47). The vast complexity of  
502 specialized metabolism in the plant kingdom will be more efficiently addressed by exploiting the  
503 variety of multidimensional NMR strategies to aid in metabolite annotations from spectra of  
504 mixtures.

505 In addition to illustrating principles by which the evolution of form occurs, our deepening  
506 understanding of specialized metabolic innovation has practical benefits. Metabolic engineering  
507 continues to be a trial and error enterprise (48). Understanding the successful evolutionary  
508 outcomes leading to synthesis of biologically active metabolites provides new enzymes,  
509 transporters and transcriptional regulators for the synthetic biology toolkit. Documenting recurring  
510 themes, such as the independent recruitment of invertases in multiple acylglucose-producing  
511 *Solanum* lineages, indicates robust strategies for engineering synthesis of these protective  
512 compounds and other structurally similar compounds of economic or pharmaceutical importance.

513

## 514 **Materials and Methods**

### 515 **Plant Material**

516 Seeds of *S. nigrum* were obtained from New York Botanical Garden (14). For germination, seeds were treated  
517 with half-strength bleach for 5 min and rinsed six times in deionized water before sowing on moist filter paper in petri  
518 dishes at 28°C. Seedlings were transferred to Jiffy-7® peat pellets (Jiffy Products of America, OH, USA) upon  
519 germination. Plants used for analysis were grown in a growth chamber at 22°C under a 16-hour photoperiod (70  $\mu\text{mol}$   
520  $\text{m}^{-2} \text{s}^{-1}$  photosynthetic photon flux density) with relative humidity set to 50%.

521

### 522 **Acylsugar metabolite annotation**

523 The acylsugar extraction protocol for LC-MS analysis is available in Protocols.io at  
524 <https://dx.doi.org/10.17504/protocols.io.xj2fkqe>. As described previously in Leong et al. (2019), leaf surface  
525 acylsugar extraction were carried out by gently agitating a single leaflet in 1 mL acetonitrile:isopropanol:water (3:3:2  
526 v/v with 0.1% formic acid and 1  $\mu\text{M}$  telmisartan; isopropanol obtained from J.T.Baker, Phillipsburg, NJ, USA, all  
527 others obtained from Sigma-Aldrich, St. Louis, MO, USA) for 2 min. Telmisartan acts as an internal standard for  
528 high-performance liquid chromatography (HPLC). The extraction solvent was collected and stored in 2-mL LC-MS  
529 vials at -20°C. All extracts were analyzed on LC-MS (Waters Corporation, MA, USA) using 7-min, 30-min or 110-  
530 min LC gradients on an Ascentis Express C18 HPLC column (10 cm x 2.1 mm, 2.7  $\mu\text{m}$ ) (Sigma-Aldrich, St. Louis,  
531 MO, USA), which was maintained at 40°C. The 110-min method minimized chromatographic overlap in support of  
532 metabolite annotation. The HPLC-MS methods are described in protocols.io and Table S10.

533 Acylsugars structures were inferred by positive and negative mode MS collision-induced dissociation as  
534 described previously (11, 29, 32, 41). In short, co-eluting fragments generated by collision-induced dissociation in  
535 negative ion mode were compared among three energy potentials to confirm acylsugar metabolites. Annotation  
536 strategy, thresholds and confidence levels were described in detail in Supplementary Text.

537 Acylsugar acyl chain composition was determined by ethyl ester derivatization and subsequent GC-MS  
538 analysis. To create fatty acid ethyl esters, acylsugar samples were saponified and transesterified as previously  
539 described in Ning et al. (2015) with some modification. In short, a leaflet was immersed in 1 mL of  
540 acetonitrile/isopropanol (1:1 v/v) for 2 min with gentle agitation. The extracts were transferred, evaporated to dryness  
541 under flowing air and redissolved in ethanol with 300  $\mu\text{L}$  of 21% (v/v) sodium ethoxide (Sigma-Aldrich, St. Louis,  
542 MO, USA). The reaction was gently vortexed every 5 min for 30 min in the fume hood. Four hundred  $\mu\text{L}$  hexane with  
543 55  $\mu\text{g}/\text{mL}$  of tetradecane (internal standard; Sigma-Aldrich, St. Louis, MO, USA) was added to the reaction mixture  
544 for phase separation. The hexane layer was transferred and extracted three times using 500  $\mu\text{L}$  saturated aqueous  
545 sodium chloride each time. The final hexane phase (~100  $\mu\text{L}$ ) was transferred to autosampler vials with glass inserts  
546 and analyzed by capillary GC-MS on an Agilent J&W DB-5 column (10-m, 0.1-mm (i.d.) fused silica column with a  
547 0.34- $\mu\text{m}$ -thick stationary phase; Agilent). One microliter of each hexane extract was injected using splitless mode.  
548 The gas chromatography program is described in Table S10. All compounds were analyzed using an Agilent 6890N



549 gas chromatograph/Agilent 5975B single quadrupole mass spectrometer using 70 eV electron ionization. Fatty acid  
550 ethyl esters were identified by library search against Agilent RTL library and compared with commercially available  
551 standards.

552 For total extract NMR profiling, acylsugars were extracted from fifteen 3-4 weeks old *S. nigrum* plants by  
553 dipping aerial tissue into 500 mL of ethanol with 0.1% (v/v) formic acid with gentle agitation in a 1-L beaker. The  
554 ethanol was evaporated under reduced pressure using a rotary evaporator with a warm water bath (40°C). The dried  
555 residue (~5 mg) of *S. nigrum* surface plant extracts were dissolved in CDCl<sub>3</sub> (99.8 atom % D-, Sigma Aldrich, St.  
556 Louis, MO, USA) and transferred to solvent-matched (5 mm) NMR Shigemi tube (Shigemi Co., LTD., Tokyo, Japan)  
557 for analysis. <sup>1</sup>H, HSQC, HMBC, and TOCSY spectra were recorded using the Avance 900 MHz spectrometer (Bruker,  
558 Billerica, MA, USA) equipped with a TCI triple resonance probe at the Michigan State University Max T. Rogers  
559 NMR facility (See Table S2-4 for more details). All spectra were referenced to non-deuterated CDCl<sub>3</sub> solvent signals  
560 ( $\delta$ H = 7.26 (s) and  $\delta$ C = 77.2 (t) ppm).

561 For silica gel column chromatography, *S. nigrum* surface plant ethanol extract was concentrated *in vacuo* (~8  
562 mg), dissolved in ethyl acetate/ hexane (1 mL, 1:1 v/v) and loaded to the silica gel column (100 g, 200-425 mesh, 60  
563 A, Jade Scientific Inc, Westland, MI, USA) packed with ethyl acetate/hexane (200 mL, 1:1 v/v) slurry. The compounds  
564 were eluted using mobile phase ethyl acetate/hexane (400 mL, 2:1 v/v in 0.02% acetic acid) with compressed air flash  
565 column chromatography. After TLC analysis (4:1 ethyl acetate/hexane, p-Anisaldehyde stain), fractions *F*<sub>15-17</sub> and *F*<sub>24-</sub>  
566 <sub>28</sub> were combined, concentrated *in vacuo* to give fraction 1 (~2 mg, R<sub>f</sub> = 0.7) and fraction 2 (~2 mg, R<sub>f</sub> =  
567 0.3). Combined samples were analyzed on NMR as described above.

568

#### 569 **Gene Identification and Phylogenetic Analysis**

570 All transcript assemblies and expression data are from Moghe et al. (2017) and were analyzed using Geneious  
571 R9.1.8 and R, respectively. To identify BAHD candidates, BLAST and TBLASTN searches were performed using  
572 ASAT sequences from tomato and *S. sinuata*. The TBLASTN hits were parsed to include only those with HXXXD  
573 motifs and DFGWG-like motif (one mismatch). The trichome-stem expression data of the remaining sequences were  
574 obtained from expression data available in the study by Moghe et al. (2017), whereas a length of 400 to 500 amino  
575 acids and the relative positions of the two motifs on these sequences were confirmed manually(36). To identify ASFF  
576 candidates, 23 invertase-like sequences from tomato were used to BLAST and TBLASTN search *S. nigrum*  
577 transcriptome. The obtained sequences were checked for trichome-enrichment and WXNDPNG, RDP, EC and DXKK  
578 motifs as described above.

579 Phylogenetic reconstructions were performed using MEGA X(49). To obtain the BAHD tree, BAHD  
580 candidate sequences were aligned against several characterized ASATs(9-11, 14) and several other BAHD sequences  
581 from D'Auria (2006) using the MUSCLE algorithm under default parameters. To obtain the invertase tree, invertase-  
582 like proteins from *S. lycopersicum*, *S. pennellii* and *S. nigrum* were aligned with the same algorithm and settings.  
583 Maximum likelihood estimations were performed with Jones-Taylor-Thornton (JTT)+G+I with 5 rate categories as  
584 the substitution model. One thousand bootstrap replicates were performed using partial deletion (30% gaps) for tree  
585 reconstruction.

586

#### 587 **Transient expression and purification of BAHD protein**

588 All Sanger DNA sequencing confirmations in this study were performed with the indicated sequencing  
589 primers at the Research Technology Support Facility Genomics Core, Michigan State University, East Lansing, MI.  
590 All primer sequences are listed in Table S9.

591 Recombinant BAHD proteins were generated using *E. coli* as the host for enzyme assays. The full-length  
592 open reading frames of *c63608\_g1*, *c65670\_g1*, *c71009\_g1*, *c53868\_g2*, *c60145\_g1*, *c65306\_g1* were amplified from  
593 *S. nigrum* young leaf and peduncle cDNA and cloned into pET28b(+) (EMD Millipore, MA, USA) using BamHI and  
594 XhoI restriction sites and 2× Gibson Assembly master mix (NEB, Ipswich, MA, USA) according to the manufacturer's  
595 instructions. The assembled constructs were transformed into BL21 Rosetta (DE3) cells (EMD Millipore, MA, USA)  
596 and submitted for Sanger sequencing.



597 Protein expression was carried out as described before (11, 16). In short, 1 L Luria-Bertani (LB) media with  
598 kanamycin (50  $\mu\text{g mL}^{-1}$ ) and chloramphenicol (33  $\mu\text{g mL}^{-1}$ ) were inoculated 500:1 with an overnight culture obtained  
599 from the bacterial strain with the desired construct. After incubating at 37°C, 225 rpm and reaching OD600 between  
600 0.5 and 0.6, large scale cultures were chilled on ice for 20 min before a final concentration of 50  $\mu\text{M}$  isopropylthio- $\beta$ -  
601 galactoside was added. Cultures were incubated at 16°C and 180 rpm for 16 h before cell pellets were harvested by  
602 centrifuging at 4,000g for 10 min under 4°C. The following protein extraction steps were also performed on ice or at  
603 4°C. The cell pellets were resuspended in 25 mL of extraction buffer (50 mM NaPO<sub>4</sub>, 300 mM NaCl, 20 mM  
604 imidazole, and 5 mM 2-mercaptoethanol, pH 8) by vortexing and submitted to eight cycles of sonication (30 s on ice  
605 with 30 s intervals for cooling). The obtained cellular extracts were centrifuged twice at 30,000g for 10 min to obtain  
606 clear supernatant. Ni-NTA resin (Qiagen, Venlo, The Netherlands) was washed 3 times and resuspended in 1 mL of  
607 extraction buffer before incubated with the centrifuged extracts at 4°C for 1 h with nutation. After removing the  
608 supernatant by centrifuging the slurry at 3,200g for 5 min, the resins were transferred to a gravity flow column (Bio-  
609 Rad Laboratories, Hercules, CA, USA) and washed with 3 column volumes of wash buffer (50 mM NaPO<sub>4</sub>, 300 mM  
610 NaCl, 40 mM imidazole, and 5 mM 2-mercaptoethanol, pH 8). Two milliliters of elution buffer (50 mM NaPO<sub>4</sub>, 300  
611 mM NaCl, 3 M imidazole, and 5 mM 2-mercaptoethanol, pH 8) was added to the column and allowed to incubate  
612 with the resin for 1 min. The elutes were then diluted into 15 mL of storage buffer (extraction buffer without  
613 imidazole), concentrated using 10-kD centrifugal filter units (EMD Millipore, MA, USA) till 1,000-fold dilution. A  
614 final volume of 40% (v/v) glycerol-elution solution was prepared and stored at -20°C. Immunoblot with the anti-His-  
615 antibody conjugated to peroxidase (BMG-His-1 monoclonal antibody; Roche, Basel, Switzerland) was used to  
616 confirm the presence of enzymes.

617

#### 618 **Transient expression and purification of SnASFF1 protein**

619 ASFF1 protein expression and purification was carried out exactly as described before(15). SnASFF1 full-  
620 length open reading frame was amplified from *S. nigrum* young leaf and peduncle cDNA using c70979\_Fw and  
621 c70979\_Rv primer and cloned into the pEAQ-HT vector(50) using NruI-HF and SmaI restriction sites and 2× Gibson  
622 Assembly master mix (NEB, Ipswich, MA) according to the manufacturer's instructions. The completed vector was  
623 subsequently transformed into *Agrobacterium tumefaciens* LBA4404 cells. Single colonies from LB agar plates with  
624 rifampicin (50  $\mu\text{g mL}^{-1}$ ) and kanamycin (50  $\mu\text{g mL}^{-1}$ ) were used to inoculate 50 mL of YEP medium with the same  
625 antibiotics in the same concentration. After overnight incubation at 28°C, 300 rpm, culture was harvested and washed  
626 in 50 ml of buffer A [10 mM 2-ethanesulfonic acid (MES; Sigma-Aldrich, St. Louis, MO, USA) at pH 5.6 and 10 mM  
627 MgCl<sub>2</sub>] before resuspended to a final OD600 = 1.0 with buffer A with 200  $\mu\text{M}$  acetosyringone (Sigma-Aldrich, St.  
628 Louis, MO, USA). The suspension was incubated at room temperature with gentle rocking for 4 hours and then  
629 infiltrated into fully expanded leaves of 6-week-old *Nicotiana benthamiana* plants using a needleless 1-mL tuberculin  
630 syringe. Infiltrated leaves were harvested, deveined, and flash-frozen in liquid nitrogen after 7-8 days. Tissue was  
631 powdered under liquid nitrogen and added to 140 mL of ice-cold buffer B [25 mM 3-[4-(2-hydroxyethyl)piperazin-1-  
632 yl]propane-1-sulfonic acid (EPPS) at pH 8.0, 1.5 M NaCl, 1 mM EDTA with 2 mM dithiothreitol (DTT), 1 mM  
633 benzamidine, 0.1 mM phenylmethanesulfonyl fluoride, 10  $\mu\text{M}$  trans-epoxysuccinyl-l-leucylamido(4-  
634 guanidino)butane (E-64), and 5% (w/v) polyvinylpyrrolidone (PVPP); all reagents were obtained from Sigma-  
635 Aldrich (St. Louis, MO, USA) except DTT, which was obtained from Roche Diagnostics (Risch-Rotkreuz,  
636 Switzerland)]. The mixture was stirred for 4 hours at 4°C before filtered through six layers of Miracloth and  
637 centrifuged at 27,000g at 4°C for 30 min. After passed through a 0.22- $\mu\text{m}$  polyethersulfone filter (EMD Millipore,  
638 Billerica, MA), the supernatant was loaded onto a HisTrap HP 1-mL affinity column and eluted using a gradient of  
639 10 to 500 mM imidazole in buffer B using an ÄKTA start FPLC module (GE Healthcare, Uppsala, Sweden). Fractions  
640 were analyzed by SDS-polyacrylamide gel electrophoresis, and the presence of SnASFF1-HT was confirmed by  
641 immunoblot using the BMG-His-1 monoclonal antibody (Roche, Basel, Switzerland). Purified SnASFF1 proteins  
642 were stored in 100 mM sodium acetate (pH 4.5) with 40% (v/v) glycerol at -20°C.

643

#### 644 **Enzyme assays**

645 Unless otherwise specified, all BAHD forward enzyme assays were performed by incubating purified  
646 recombinant proteins in 60  $\mu$ L of 100 mM ammonium acetate (pH 6.0) buffer with 100  $\mu$ M acyl-CoA and an acyl  
647 chain acceptor (unmodified sugar or purified or fractionated acylsugar acceptors in an ethanol:water mixture (1:1  
648 v/v)) at 30°C for 30 min. After the incubation, 2 volumes of stop solution [acetonitrile:isopropanol (1:1) with 0.1%  
649 (v/v) formic acid and 1  $\mu$ M telmisartan as internal standard] was added to the assays and mixed. Reactions were  
650 centrifuged at 17,000g for 5 min, and the supernatants were stored at -20°C after being transferred to LC-MS vials.  
651 SnASFF1 enzyme assays were carried out in a similar manner in the absence of acyl-CoAs. For BAHD reverse enzyme  
652 assays, 100  $\mu$ M free Coenzyme A were used in place of acyl-CoAs. For negative controls, enzymes boiled at 95°C for  
653 10 min were used in place of active enzymes. Methods used to determine the apparent  $K_m$  value for different substrates  
654 were performed as previously described(11). Tested sugars, free coenzyme A and nC10-, nC8-, iC5-, iC4-CoAs were  
655 obtained from Sigma-Aldrich, St. Louis, MO, USA, whereas iC10-CoA and aiC5-CoA were produced following  
656 method described in Kawaguchi et al., 1981(51).

657

#### 658 **Purification of S1:10 and S2:14**

659 Purifications were performed using a Waters 2795 Separations Module (Waters Corporation) and an Acclaim  
660 120 C18 HPLC column (4.6 mm  $\times$  150 mm, 5  $\mu$ m; Thermo Fisher Scientific, Waltham, MA, USA) with a column  
661 oven temperature of 30°C and flow rate of 1 mL/min. For S1:10 purification, the mobile phase consisted of water with  
662 0.1% (solvent A) and acetonitrile (solvent B). For *in vivo* S2:14 purification, two purification methods where solvent  
663 B consist of acetonitrile and methanol, respectively, were used in a sequential manner to enhance purity of compounds.  
664 The HPLC methods used for separating S1:10 and S2:14 are described in Table S10. Fractions were collected using a  
665 2211 Superrac fraction collector (LKB Bromma, Stockholm, Sweden).

666

#### 667 **VIGS Analysis**

668 VIGS target regions were selected to have a low chance of altering expression of trichome expressed non-  
669 target genes(14). These fragments were amplified from *S. nigrum* young leaf and peduncle cDNA using primers listed  
670 in Table S9 and were cloned into pTRV2-LIC as previously described (16). In short, the PstI-HF-linearized pTRV2-  
671 LIC vector and all PCR fragments were separately incubated in 5- $\mu$ L T4 DNA polymerase reactions with 5 mM dATP  
672 or dTTP, respectively. The reactions were incubated at 22°C for 30 min, then 70°C for 20 min, and then stored on ice.  
673 Two microliters of desired PCR reaction were mixed with 1  $\mu$ L vector reaction and incubated at 65°C for 2 min,  
674 followed by 22°C for 10 min. Sequenced constructs and pTRV1 were transformed into *A. tumefaciens* strain GV3101  
675 using the protocol described previously(15).

676 The vacuum infiltration protocol was adapted from Hartl et al. (2008) (52). Twenty-five milliliters of LB  
677 medium with kanamycin (50  $\mu$ g mL<sup>-1</sup>), rifampicin (50  $\mu$ g mL<sup>-1</sup>), and gentamicin (10  $\mu$ g mL<sup>-1</sup>) were inoculated with a  
678 single colony of the respective Agrobacterium strain from plate. After overnight incubation at 28°C and 225 rpm, cells  
679 were harvested by centrifugation at 3,200g for 10 min and resuspended to a final OD600 = 1 with the induction media  
680 (10 mM MES, pH 5.6, and 10 mM MgCl<sub>2</sub>). An equal volume of pTRV1 suspension was mixed with different pTRV2-  
681 LIC constructs suspension. 200  $\mu$ M acetosyringone was added to each mixture before the suspension was incubated  
682 in the dark at room temperature with gentle rocking for 3 hours. Seven to ten days-old *S. nigrum* seedlings were  
683 carefully transferred from the petri dishes to the bacteria solution. Vacuum was applied in a desiccator for 2 min,  
684 followed by slow release of the vacuum. Infiltrated seedlings were kept for 3 d under indirect light, then planted in  
685 Jiffy-7® peat pellets and grown in a climate chamber as described above. Metabolite and tissue samples were  
686 harvested approximately 3 weeks post infiltration and phytoene desaturase silencing efficiency was monitored.

687 The QuanLynx function in MassLynx v4.1 (Waters Corporation, MA, USA) was used to integrate extracted  
688 ion chromatograms from untargeted LC-MS data as described previously (29). In short, all quantifications were  
689 performed using extracted ion chromatograms of the  $m/z$  value for the relevant  $[M+NH_4]^+$  or  $[M+HCOO]^-$  adduct ions  
690 using a mass window of  $m/z$  0.05. Isomeric forms of acylsugars (including anomers) were quantified in corresponding  
691 groups as shown in Table S1. The retention time window was adjusted for each compound to include all isomers. Peak  
692 area of telmisartan was quantified and used as an internal reference. Then, acylsugar quantities (per mg) were

693 calculated by normalizing peak areas to the internal standard peak area and dry leaf weight, whereas acylsugar ratios  
694 were calculated by comparing peak areas over internal standard peak area of acylsugars of interest.

695

### 696 **qPCR Analysis**

697 RNA was extracted with the RNeasy Plant Mini Kit including on-column DNase digestion (Qiagen, Venlo,  
698 The Netherlands), according to the manufacturer's instructions. RNA was quantified with a Nanodrop 2000c  
699 instrument (Thermo Fisher Scientific, Waltham, MA, USA). cDNA was synthesized using 1mg of the isolated RNA  
700 and SuperScript II Reverse Transcriptase (Invitrogen, Carlsbad, CA, USA). The cDNA samples were diluted 40-fold  
701 (10-fold initial dilution and 4-fold dilution into qPCRs). qPCRs (10 $\mu$ L) were created with SYBR Green PCR Master  
702 Mix (Thermo Fisher Scientific, Waltham, MA, USA), and primers were used at a final concentration of 200 nM.  
703 RT\_SnASAT1\_F/R, RT\_SnASAT2\_F/R, RT\_SnASFF1\_F/R, RT\_SnAGAT1\_F/R, RT\_Actin\_1\_F/R, and  
704 RT\_Actin\_3\_F/R primers were used to detect *SnASAT1*, *SnASAT2*, *SnASFF1*, *SnAGAT1*, *ACTIN1*, and *ACTIN3*  
705 transcripts, respectively (Table S9). Reactions were carried out with a QuantStudio 7 Flex Real-Time PCR System  
706 (Applied Bio-systems) by the Michigan State University RTSF Genomics Core. The following temperature cycling  
707 conditions were applied: 50°C for 2 min, 95°C for 10 min, and 40 cycles of 95°C for 15 s and 60°C for 1 min. Relative  
708 expression of *SnASAT1*, *SnASAT2*, *SnASFF1*, and *SnAGAT1* was calculated with the  $\Delta\Delta$ Ct method (53) and  
709 normalized to the geometric mean of *ACTIN1* and *ACTIN3* transcript levels. The mean expression values of the  
710 transcripts in the control plants were used for normalization. Three to four technical replicates were used for all the  
711 qPCRs.

712

### 713 **Statistical Analysis**

714 All statistical analyses were performed using the “stats” R package (R Core Team, 2017). Welch two-sample  
715 *t* tests were executed on metabolites and transcript abundance data using the “t.test” command. The power of these  
716 analyses was determined using the “power.t.test” function.

717

### 718 **References**

719

- 720 1. N. Agerbirk, C. E. Olsen, Glucosinolate structures in evolution. *Phytochemistry*. **77**, 16–45 (2012).
- 721 2. B. Barco, N. K. Clay, Evolution of glucosinolate diversity via whole-genome duplications, gene  
722 rearrangements, and substrate promiscuity. *Annu. Rev. Plant Biol.* **70**, 585–604 (2019).
- 723 3. H. M. Niemeyer, Hydroxamic acids derived from 2-hydroxy-2 H-1, 4-benzoxazin-3 (4 H)-one: key defense  
724 chemicals of cereals. *J. Agric. Food Chem.* **57**, 1677–1696 (2009).
- 725 4. S. Zhou, A. Richter, G. Jander, Beyond Defense: Multiple Functions of Benzoxazinoids in Maize  
726 Metabolism. *Plant Cell Physiol.* **59**, 1528–1537 (2018).
- 727 5. J.-K. Weng, R. N. Philippe, J. P. Noel, The rise of chemodiversity in plants. *Science*. **336**, 1667–1670  
728 (2012).
- 729 6. L. Chae, T. Kim, R. Nilo-poyanco, S. Y. Rhee, Genomic Signatures of Specialized Metabolism in Plants.  
730 *Science*. **344**, 510–513 (2014).
- 731 7. G. D. Moghe, R. L. Last, Something Old, Something New: Conserved Enzymes and the Evolution of  
732 Novelty in Plant Specialized Metabolism. *Plant Physiol.* **169**, 1512–23 (2015).
- 733 8. P. Fan, B. J. Leong, R. L. Last, Tip of the trichome : evolution of acylsugar metabolic diversity in  
734 Solanaceae. *Curr. Opin. Plant Biol.* **49**, 8–16 (2019).
- 735 9. A. L. Schillmiller, A. L. Charbonneau, R. L. Last, Identification of a BAHD acetyltransferase that produces  
736 protective acyl sugars in tomato trichomes. *Proc. Natl. Acad. Sci.* **109**, 16377–16382 (2012).
- 737 10. A. L. Schillmiller, G. D. Moghe, P. Fan, B. Ghosh, J. Ning, A. D. Jones, R. L. Last, Functionally divergent  
738 alleles and duplicated Loci encoding an acyltransferase contribute to acylsugar metabolite diversity in  
739 *Solanum* trichomes. *Plant Cell.* **27**, 1002–17 (2015).
- 740 11. P. Fan, A. M. Miller, A. L. Schillmiller, X. Liu, I. Ofner, A. D. Jones, D. Zamir, R. L. Last, *In vitro*  
741 reconstruction and analysis of evolutionary variation of the tomato acylsucrose metabolic network. *Proc.*  
742 *Natl. Acad. Sci.* **113**, E239–E248 (2016).
- 743 12. P. Fan, A. M. Miller, X. Liu, A. D. Jones, R. L. Last, Evolution of a flipped pathway creates metabolic  
744 innovation in tomato trichomes through BAHD enzyme promiscuity. *Nat. Commun.* **8**, 1–13 (2017).
- 745 13. S. S. Nadakuduti, J. B. Uebler, X. Liu, A. D. Jones, C. S. Barry, Characterization of trichome-expressed  
746 BAHD acyltransferases in *Petunia axillaris* reveals distinct acylsugar assembly mechanisms within the

- 747 Solanaceae. *Plant Physiol.* **175**, 36–50 (2017).
- 748 14. G. D. Moghe, B. J. Leong, S. Hurney, A. D. Jones, R. L. Last, Evolutionary routes to biochemical  
749 innovation revealed by integrative analysis of a plant-defense related specialized metabolic pathway. *eLife*  
750 (2017).
- 751 15. B. J. Leong, D. B. Lybrand, Y. Lou, P. Fan, A. L. Schillmiller, R. L. Last, Evolution of metabolic novelty : A  
752 trichome-expressed invertase creates specialized metabolic diversity in wild tomato. *Sci. Adv.*, 1–14 (2019).
- 753 16. B. J. Leong, S. M. Hurney, P. D. Fiesel, G. D. Moghe, A. D. Jones, R. L. Last, Specialized metabolism in a  
754 nonmodel nightshade: trichome acylinositol biosynthesis. *Plant Physiol.* **183**, 915–924 (2020).
- 755 17. B. M. Leckie, D. A. D’Ambrosio, T. M. Chappell, R. Halitschke, D. M. De Jong, A. Kessler, G. G.  
756 Kennedy, M. A. Mutschler, Differential and synergistic functionality of acylsugars in suppressing  
757 oviposition by insect herbivores. *PLoS One.* **11**, 1–19 (2016).
- 758 18. J. R. Smeda, A. L. Schillmiller, R. L. Last, M. A. Mutschler, Introgression of acylsugar chemistry QTL  
759 modifies the composition and structure of acylsugars produced by high-accumulating tomato lines. *Mol.*  
760 *Breed.* **36**, 160 (2016).
- 761 19. A. Weinhold, I. T. Baldwin, Trichome-derived O-acyl sugars are a first meal for caterpillars that tags them  
762 for predation. *Proc. Natl. Acad. Sci. U. S. A.* **108**, 7855–7859 (2011).
- 763 20. V. T. Luu, A. Weinhold, C. Ullah, S. Dressel, M. Schoettner, K. Gase, E. Gaquerel, S. Xu, I. T. Baldwin, O-  
764 acyl sugars protect a wild tobacco from both native fungal pathogens and a specialist herbivore. *Plant*  
765 *Physiol.* **174.1**, 370-386 (2017).
- 766 21. R. R. King, L. A. Calhoun, R. P. Singh, 3,4-Di-O- and 2,3,4-tri-O-acylated glucose esters from the glandular  
767 trichomes of nontuberous *Solanum* species. *Phytochemistry.* **27**, 3765–3768 (1988).
- 768 22. T. Matsuzaki, Y. Shinozaki, S. Suhara, T. Tobita, Leaf Surface Glycolipids from *Nicotiana acuminata* and  
769 *Nicotiana pauciflora*. *Agric. Biol. Chem.* **55**, 1417–1419 (1991).
- 770 23. Y. Herrera-Salgado, M. L. Garduño-Ramírez, L. Vázquez, M. Y. Rios, L. Alvarez, Myo-inositol-derived  
771 glycolipids with anti-inflammatory activity from *Solanum lanceolatum*. *J. Nat. Prod.* **68**, 1031–1036 (2005).
- 772 24. E. Maldonado, F. R. Torres, M. Martinez, A. L. Pérez-Castorena, Sucrose esters from the fruits of *Physalis*  
773 *nicandroides* var. *attenuata*. *J. Nat. Prod.* **69**, 1511–1513 (2006).
- 774 25. C. Dutra, M. V. Cesio, P. Moyna, H. Heinzen, Acyl sucroses from *Salpichroa origanifolia*. *Nat. Prod.*  
775 *Commun.* **3**, 539–542 (2008).
- 776 26. J. M. Alba, M. Montserrat, R. Fernández-Muñoz, Resistance to the two-spotted spider mite (*Tetranychus*  
777 *urticae*) by acylsucroses of wild tomato (*Solanum pimpinellifolium*) trichomes studied in a recombinant  
778 inbred line population. *Exp. Appl. Acarol.* **47**, 35–47 (2009).
- 779 27. J. Kim, K. Kang, E. Gonzales-Vigil, F. Shi, A. D. Jones, C. S. Barry, R. L. Last, Striking natural diversity in  
780 glandular trichome acylsugar composition is shaped by variation at the Acyltransferase2 locus in the wild  
781 tomato *Solanum habrochaites*. *Plant Physiol.* **160**, 1854–1870 (2012).
- 782 28. X. Liu, M. Enright, C. S. Barry, A. D. Jones, Profiling, isolation and structure elucidation of specialized  
783 acylsucrose metabolites accumulating in trichomes of *Petunia* species. *Metabolomics.* **13**, 1–10 (2017).
- 784 29. D. B. Lybrand, T. M. Anthony, A. D. Jones, An integrated analytical approach reveals trichome acylsugar  
785 metabolite diversity in the wild tomato *Solanum pennellii*. *Metabolites.* **10**, 401 (2020).
- 786 30. J. C. Goffreda, M. A. Mutschler, D. A. Avé, W. M. Tingey, J. C. Steffens, Aphid deterrence by glucose  
787 esters in glandular trichome exudate of the wild tomato, *Lycopersicon pennellii*. *J. Chem. Ecol.* **15**, 2135–  
788 2147 (1989).
- 789 31. T. Matsuzaki, Y. Shinozaki, S. Suhara, H. Shigematsu, A. Koiwai, Isolation and characterization of tetra-  
790 and triacylglycerol from the surface lipids of *Nicotiana glauca*. **1369**, 2–5 (2014).
- 791 32. B. Ghosh, A. D. Jones, Profiling, characterization, and analysis of natural and synthetic acylsugars (sugar  
792 esters). *Anal. Methods.* **9**, 892–905 (2017).
- 793 33. E. A. P. Ekanayaka, M. D. Celiz, A. D. Jones, Relative mass defect filtering of mass spectra: a path to  
794 discovery of plant specialized metabolites. *Plant Physiol.* **167**, 1221–1232 (2015).
- 795 34. S. M. Hurney, "Strategies for profiling and discovery of acylsugar specialized metabolites," thesis, Michigan  
796 State University, East Lansing, MI (2018).
- 797 35. K. Bingol, L. Bruschweiler-Li, D.-W. Li, R. Bruschweiler, Customized metabolomics database for the  
798 analysis of NMR 1H--1H TOCSY and 13C--1H HSQC-TOCSY spectra of complex mixtures. *Anal. Chem.*  
799 **86**, 5494–5501 (2014).
- 800 36. J. C. D’Auria, Acyltransferases in plants: a good time to be BAHD. *Curr. Opin. Plant Biol.* **9**, 331–340  
801 (2006).
- 802 37. K. Le Roy, W. Lammens, M. Verhaest, B. De Coninck, A. Rabijns, A. Van Laere, W. den Ende, Unraveling



- 803 the difference between invertases and fructan exohydrolases: a single amino acid (Asp-239) substitution  
804 transforms Arabidopsis cell wall invertase1 into a fructan 1-exohydrolase. *Plant Physiol.* **145**, 616–625  
805 (2007).
- 806 38. W. Lammens, K. Le Roy, A. Van Laere, A. Rabijns, W. den Ende, Crystal structures of *Arabidopsis*  
807 *thaliana* cell-wall invertase mutants in complex with sucrose. *J. Mol. Biol.* **377**, 378–385 (2008).
- 808 39. V. A. Reddy, F. Maley, Identification of an active-site residue in yeast invertase by affinity labeling and site-  
809 directed mutagenesis. *J. Biol. Chem.* **265**, 10817–10820 (1990).
- 810 40. E. Fridman, D. Zamir, Functional divergence of a syntenic invertase gene family in tomato, potato, and  
811 arabidopsis 1. **131**, 603–609 (2003).
- 812 41. B. Ghosh, T. C. Westbrook, A. D. Jones, Comparative structural profiling of trichome specialized  
813 metabolites in tomato (*Solanum lycopersicum*) and *S. habrochaites* : acylsugar profiles revealed by UHPLC  
814 / MS and NMR. *Metabolomics*, 496–507 (2014).
- 815 42. J. C. Del Rio, J. Rencoret, P. Prinsen, A. T. Martinez, J. Ralph, A. Gutiérrez, Structural characterization of  
816 wheat straw lignin as revealed by analytical pyrolysis, 2D-NMR, and reductive cleavage methods. *J. Agric.*  
817 *Food Chem.* **60**, 5922–5935 (2012).
- 818 43. T. Asai, N. Hara, Y. Fujimoto, Phytochemistry Fatty acid derivatives and dammarane triterpenes from the  
819 glandular trichome exudates of *Ibicella lutea* and *Proboscidea louisiana*. *Phytochemistry.* **71**, 877–894  
820 (2010).
- 821 44. T. A. Sai, T. S. Akai, K. O. Hyama, Y. F. Ujimoto, n-Octyl  $\alpha$ -L-Rhamnopyranosyl-(1→2)- $\beta$ -D-  
822 glucopyranoside Derivatives from the Glandular Trichome Exudate of *Geranium carolinianum*. *Chem*  
823 *Pharm Bull.* **59**, 747–752 (2011).
- 824 45. T. Asai, Y. Nakamura, Y. Hirayama, K. Ohyama, Y. Fujimoto, Cyclic glycolipids from glandular trichome  
825 exudates of *Cerastium glomeratum*. *Phytochemistry.* **82**, 149–157 (2012).
- 826 46. Q. Wu, J. G. Cho, D. S. Lee, D. Y. Lee, N. Y. Song, Y. C. Kim, K. T. Lee, H. G. Chung, M. S. Choi, T. S.  
827 Jeong, E. M. Ahn, G. S. Kim, N. I. Baek, Carbohydrate derivatives from the roots of *Brassica rapa* ssp.  
828 *campestris* and their effects on ROS production and glutamate-induced cell death in HT-22 cells.  
829 *Carbohydr. Res.* **372**, 9–14 (2013).
- 830 47. Y. Liu, S. Jing, S. Luo, S. Li, Non-volatile natural products in plant glandular trichomes: chemistry,  
831 biological activities and biosynthesis. *Natural Product Reports* **36.4**, 626–665 (2019).
- 832 48. L. J. Sweetlove, R. L. Last, A. R. Fernie, Predictive metabolic engineering: a goal for systems biology. *Plant*  
833 *Physiol.* **132**, 420–425 (2003).
- 834 49. S. Kumar, G. Stecher, M. Li, C. Knyaz, K. Tamura, MEGA X: molecular evolutionary genetics analysis  
835 across computing platforms. *Mol. Biol. Evol.* **35**, 1547 (2018).
- 836 50. H. Peyret, G. P. Lomonosoff, The pEAQ vector series: the easy and quick way to produce recombinant  
837 proteins in plants. *Plant Mol. Biol.* **83**, 51–58 (2013).
- 838 51. A. Kawaguchi, T. YOSHIMURA, S. Okuda, A new method for the preparation of acyl-CoA thioesters. *J.*  
839 *Biochem.* **89**, 337–339 (1981).
- 840 52. M. Hartl, H. Merker, D. D. Schmidt, I. T. Baldwin, Optimized virus-induced gene silencing in *Solanum*  
841 *nigrum* reveals the defensive function of leucine aminopeptidase against herbivores and the shortcomings of  
842 empty vector controls. *New Phytol.* **179**, 356–365 (2008).
- 843 53. M. W. Pfaffl, A new mathematical model for relative quantification in real-time RT-PCR. *Nucleic Acids*  
844 *Res.* **29**, e45–e45 (2001).

845  
846

## 847 Acknowledgments

848 We acknowledge the MSU RTSF Mass Spectrometry and Metabolomics Core Facilities  
849 for their support with LC-MS analysis. We thank Dr. D. Holms and L. Xie at the Michigan  
850 State University Max T. Rogers NMR Facility for technical assistance. We thank Dr. Dan  
851 Lybrand for helpful advice and generously providing the pET28b-SnASAT1 construct. We  
852 also acknowledge the valuable feedback received from members of the Last lab.

853

854 **Funding:** This work was supported by the US National Science Foundation Plant  
855 Genome Research Program grant IOS-1546617 to R.L.L. and A.D.J. and the National

856 Institute of General Medical Sciences of the National Institutes of Health graduate  
857 training grant no. T32–GM110523 to P.D.F.

858

859 **Author contributions:**

860 Design: YRL, TMA, ADJ, RLL

861 NMR experiments and data analysis: TMA, PDF, ADJ

862 Biochemical and biological experiments and data analysis: YRL, PDF, REA and EMC

863 Interpretation and preparation of figures and table: YRL, TMA, PDF

864 Writing – original draft: YRL, RLL

865 Writing – review and editing: YRL, TMA, PDF, REA, EMC, ADJ and RLL

866

867 **Competing interests:** The authors declare that they have no competing interests.

868

869 **Data and materials availability:** All data needed to evaluate the conclusions in the paper  
870 are present in the paper and/or the Supplementary Materials. Additional data related to this  
871 paper may be requested from the authors. The constructs pET28b-SnASAT1, pET28b-  
872 SnASAT2, pET28b-SnAGAT1, and pEAQ-HT-SnASFF1 can be provided by Y.-R.L.  
873 pending a completed material transfer agreement. Requests for biological materials or data  
874 should be submitted to R.L.L. at [lastr@msu.edu](mailto:lastr@msu.edu).

875

876

877 **Figures and Tables**

878

879 **Figure 1. Integrated analysis of *S. nigrum* acylhexose structures.** (A) LC-MS profile of *S.*  
880 *nigrum* leaf dip extracts reveals acylsugar-like compounds. Metabolites a, b and c represent the  
881 most abundant acylinositol, diacylglucose and triacylglucose, respectively. See Fig. S1, S2, S3,  
882 Table S1 and Supplementary Methods for details. (B) Fatty acid ethyl ester profile of saponified  
883 acylsugars analyzed using GC-MS reveal abundant iC4, iC5, aiC5, as well as straight and branched  
884 C8, C9 and C10 acyl chains. The abbreviations “i” and “ai” refer to *iso*- and *anteiso*- branched  
885 isomers (terminally and sub-terminally branched, respectively). (C) Schematic of pipeline used  
886 for acylsugar structure determination. (D) NMR analysis of total acylsugars revealed that the most  
887 abundant acylsugar contains a glucose core and acyl chains on C2, C3 and C4 ring protons. BPI,  
888 base peak intensity; ESI-, negative electrospray ionization. All ESI- mode acylsugars are identified  
889 as formate adducts. The corresponding *m/z* of these compounds are listed in Table S1 and  
890 Supplementary Methods.

891

892 **Figure 2. *S. nigrum* accumulates triacylinositols and di- and triacylated acylglucoses.** (A)

893 Silica flash column separation of leaf dip extracts into less polar fraction 1 and more polar fraction

894 2, as analyzed by thin layer chromatography. (B) LC-MS profile of fraction 1 reveals mostly

895 triacylglucoses. The peaks of metabolite c (cyan dashed rectangle) with identical  $m/z$  and mass  
896 spectra represent the two anomers each of two structural isomers of triacylglucose G3:16(2,4,10).  
897 (C) LC-MS profile of fraction 2 reveals abundant diacylglucoses and triacylinositols. The two  
898 peaks with  $m/z$  and mass spectra consistent with metabolite a (orange dashed rectangle) represent  
899 two structural isomers of I3(4,4,8), whereas metabolite b (magenta dashed rectangle) resolves into  
900 multiple peaks representing the two anomers of the two structural isomers of G2:14(4,10). (D)  
901 NMR-resolved structure of metabolite c, the most abundant triacylglucose in fraction 1. See Table  
902 S2 for details. (E) HSQC-TOCSY separated spin systems between diacylglucoses and  
903 triacylinositols in fraction 2. See Fig. S4 for details. (F) NMR-resolved structure of metabolite b,  
904 the most abundant diacylglucose, and (G) metabolite a, the most abundant triacylinositol in  
905 fraction 2. See Table S3 and S4 for details. BPI, base peak intensity; ESI-, negative electrospray  
906 ionization. All chromatograms showing telmisartan as internal standard (I.S.). All ESI- mode  
907 acylsugars are identified as formate adducts. The corresponding  $m/z$ 's of these compounds are  
908 listed in Table S1.

909

910 **Figure 3. Diacylsucroses accumulate in *SnASFF1* virus induced gene silencing (VIGS) lines.**

911 LC-MS analysis of acylsugars extracted from *SnASFF1*-targeted (purple trace) and empty vector  
912 VIGS plants (black trace) show that *SnASFF1*-silenced lines accumulate diacylsucroses that are  
913 undetectable in control plants. The acylation at positions 3 and 4 on S2:14(4,10) was verified by  
914 NMR as shown in Fig. S5. Extracted ion chromatogram (EIC) values indicate telmisartan as  
915 internal standard (I.S.) [ $m/z$  513.23] and the formic adducts of S2:12 ( $m/z$  583.26), S2:13 ( $m/z$   
916 597.28), S2:14 ( $m/z$  611.29), and S2:15 ( $m/z$  625.31). ESI-, negative electrospray ionization.

917

918 **Figure 4. SnASAT1 and SnASAT2 sequential reaction produces diacylsucroses. (A)**

919 Maximum likelihood phylogeny analysis of amino acid sequences of ASAT candidates showed  
920 that SnASAT1 and SnASAT2 cluster with characterized ASAT1 and ASAT2 in tomato species,  
921 while SnAGAT1 clusters with the Solanaceae acylsugar acetyltransferases, SlASAT4, SsASAT5  
922 and SqTAIAT. (B) LC-MS analysis of *in vitro* assay products showing that SnASAT1 produces  
923 monoacylsucrose S1:10(10<sup>R4</sup>) from sucrose and nC10-CoA substrates. The acylation at 4-position  
924 was verified by NMR as shown in Fig. S9. Blue trace represents full enzyme assays, whereas the  
925 black trace has heat-denatured SnASAT1. (C) LC-MS analysis of *in vitro* assay products showing



926 that SnASAT2 produces diacylsucrose S2:14(4,10) from monoacylsucrose S1:10(10<sup>R4</sup>) and iC4-  
927 CoA substrates. Green trace represents full enzyme assays, whereas the black trace has heat-  
928 denatured SnASAT2. **(D)** *In vitro*-generated S2:14(iC4, nC10) and S2:14(iC4, iC10) co-elute (top  
929 and middle, respectively) with the *in vivo* S2:14(4,10) isomers from *SnASFF1*-silenced lines  
930 (bottom). S2:14(iC4, nC10) products in C and D are from two independent technical replicates.  
931 **(E)** Summary of the reactions catalyzed by SnASAT1 and SnASAT2 with sucrose and  
932 monoacylsucroses, respectively, and acyl-CoA substrates of different chain lengths. For more  
933 details, see Fig. S12. \*Acylation at 3-position verified from SnASAT2-products co-elution with  
934 NMR characterized S2:14(4,10) with acyl chains as R<sub>3</sub> and R<sub>4</sub> from *S. nigrum*. All chromatographs  
935 are combined extracted ion chromatogram (ESI-) with telmisartan internal standard (I.S.) (*m/z*  
936 513.23) and the formic adducts of S1:10(10) (*m/z* 541.25) or S2:12(4,10) (*m/z* 611.29).

937

938 **Figure 5. SnASFF1 and SnAGAT1 sequential activities with both *in vitro* and *in vivo***  
939 **diacylsucrose substrates produces triacylglycerols.** **(A)** SnASFF1 activity (purple traces) with  
940 the major *in vitro* S2:14(iC4, nC10) from consecutive SnASAT1 and SnASAT2 reactions (top);  
941 and the early- and late-eluting *in vivo* diacylsucroses S2:14(4,10) from VIGS-*SnASFF1* lines  
942 (bottom and middle, respectively) produced two distinct sets of diacylglycerols that collectively  
943 explains the multiple peaks of *S. nigrum* G2:14(4<sup>R3</sup>,10<sup>R4</sup>) (magenta trace). The diacylglycerol  
944 products from *in vitro* S2:14(iC4, nC10) and the late-eluting *in vivo* S2:14(4,10) are  
945 chromatographically indistinguishable from the late-eluting *S. nigrum* G2:14(4<sup>R3</sup>,10<sup>R4</sup>). Black  
946 traces represent reactions with heat-denatured enzymes. **(B)** SnAGAT1 activities (orange traces)  
947 with the diacylglycerols produced by SnASFF1 activities with *in vitro*- and *in vivo* diacylsucrose  
948 S2:14(4,10) substrates produce two distinct set of triacylglycerol products that collectively explains  
949 the triplet-like peaks of G3:14(2<sup>R2</sup>,4<sup>R3</sup>,10<sup>R4</sup>) in *S. nigrum* leaf extracts (cyan trace). Combined  
950 extracted ion chromatogram (EIC) under negative electrospray ionization (ESI-) showing formic  
951 adducts of S2:14(4,10) (*m/z* 611.29), G2:14(4,10) (*m/z* 449.24) and G3:16(2,4,10) (*m/z* 491.25).  
952 **(C)** Summary of results of SnASFF1 and SnAGAT1 activities in the reconstructed acylglycerol  
953 biosynthetic pathway.

954

955 **Figure 6. Phylogenetic analysis of SnASFF1 and SpASFF1 reveals independent evolution.**  
956 Invertase-like proteins from *S. lycopersicum*, *S. pennellii* and *S. nigrum* were aligned using

957 MUSCLE with default parameters in MEGA X. SnASFF1 is marked bold in purple, whereas  
958 SpASFF1 is marked bold in black. Maximum likelihood tree constructed using the Jones-Taylor-  
959 Thornton algorithm with 1000 bootstrap support using the topology-only tree in MEGA X.

960

961 **Figure 7. Independent validation of the reconstructed acylglucose biosynthetic pathway with**  
962 ***in vitro* reverse activities. (A)** LC-MS analysis of reverse enzyme assay products from SnAGAT1  
963 activity (orange trace) shows SnAGAT1 deacetylating *S. nigrum* fraction 1 tri-acylglucoses in the  
964 presence of free coenzyme A. Combined extracted ion chromatogram (EIC) under negative  
965 electrospray ionization (ESI-) showing telmisartan as internal standard (I.S.) ( $m/z$  513.23) and  
966 formic adducts of G2:12, G2:13, G2:14 and G2:15. The corresponding  $m/z$ 's of these compounds  
967 are listed in Table S1. **(B)** Schematic representation of the reconstructed *S. nigrum* triacylglucose  
968 biosynthetic pathway. Blue arrows indicate *in vitro* pathway reconstruction starting from sucrose,  
969 green arrows indicate enzyme activities with plant-derived products. **(C)** SnASAT2 activities with  
970 the major (top) – but not minor (second from the top) – *in vitro* S2:14(iC4, nC10) products and the  
971 early- and late-eluting *in vivo* diacylsucrose S2:14(4,10) substrates from VIGS-*SnASFF1* lines  
972 (second from the bottom and bottom, respectively) produce monoacylsucrose products that can  
973 further be deacylated by SnASAT1 activity (bottom right). The monoacylsucrose intermediates  
974 from the late-eluting *in vivo* S2:14(4,10) and *in vitro* S2:14(iC4, nC10) (top and third from top)  
975 are chromatographically indistinguishable from S1:10(nC10<sup>R4</sup>). Combined extracted ion  
976 chromatogram (EIC) under negative electrospray ionization (ESI-) showing formic adducts of  
977 S2:14(4,10) ( $m/z$  611.29) and S1:10(10) ( $m/z$  541.25).

978

979 **Figure 8. *In vivo* validation of the reconstructed acylglucose biosynthetic pathway with**  
980 **VIGS. (A)** Comparison of acylglucose accumulation in *SnASAT1*-targeted and empty vector VIGS  
981 plants. Acylsugars were analyzed using LC-MS in ESI+ mode. **(B)** Comparison of acylglucose  
982 accumulation in *SnASAT2*-targeted and empty vector VIGS plants. Acylsugars were analyzed  
983 using LC-MS in ESI- mode. **(C)** Comparison of the ratio of diacylglucose G2:14 and triacylglucose  
984 G3:16 in *SnAGAT1*-targeted and empty vector VIGS plants. Diacylglucose quantities were  
985 measured by integrating peak areas of G2:12, G2:13, G2:14 and G2:15, whereas triacylglucose  
986 quantities were measured by integrating peak areas of G3:14, G3:15, G3:16 and G3:17. The  
987 integrated peak areas were normalized to the internal standard telmisartan and dry leaf weights.

988 Peak areas of G2:14 and G3:16 were integrated under negative mode and normalized to the internal  
989 standard telmisartan and dry leaf weights to measure the ratio between tri- and diacylglucoses. The  
990 corresponding  $m/z$  of analyzed acylsugars are listed in Table S1 unless otherwise specified.  
991 Significant levels are shown (\*,  $p < 0.05$ ; \*\*,  $p < 0.01$ ; \*\*\*,  $p < 0.001$ ; Welch's two sample t-test).  
992  
993

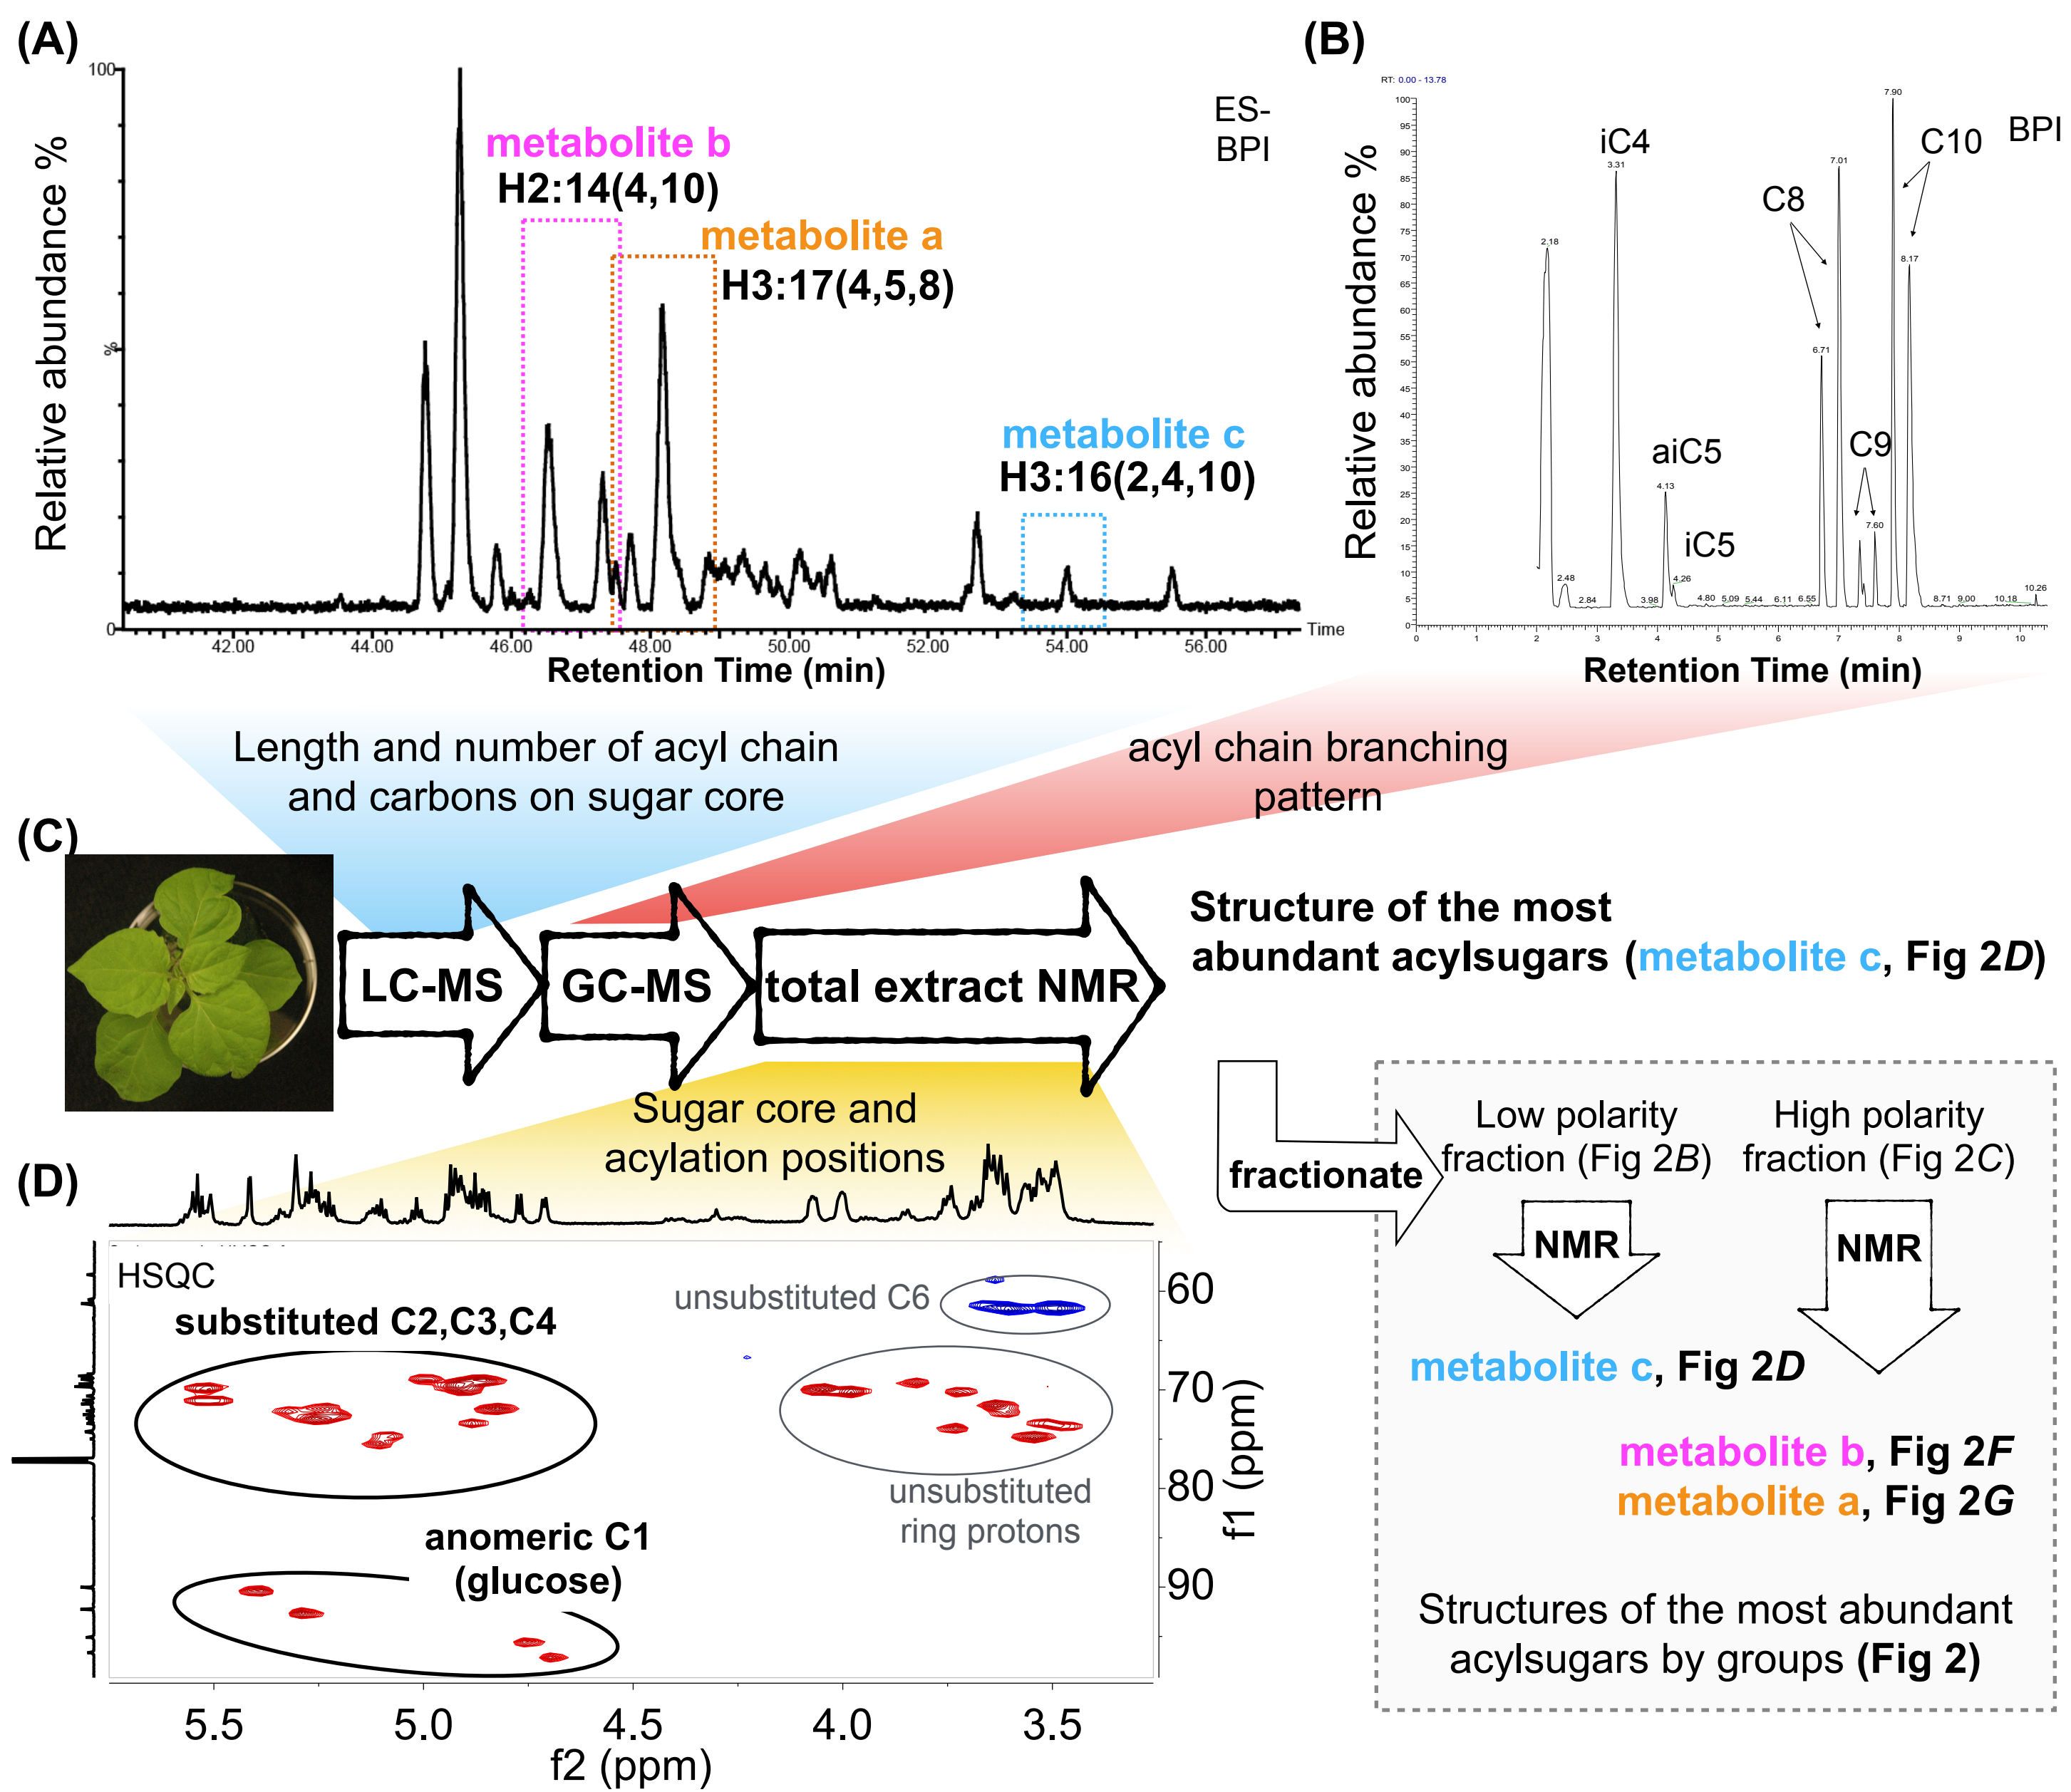

Figure 1

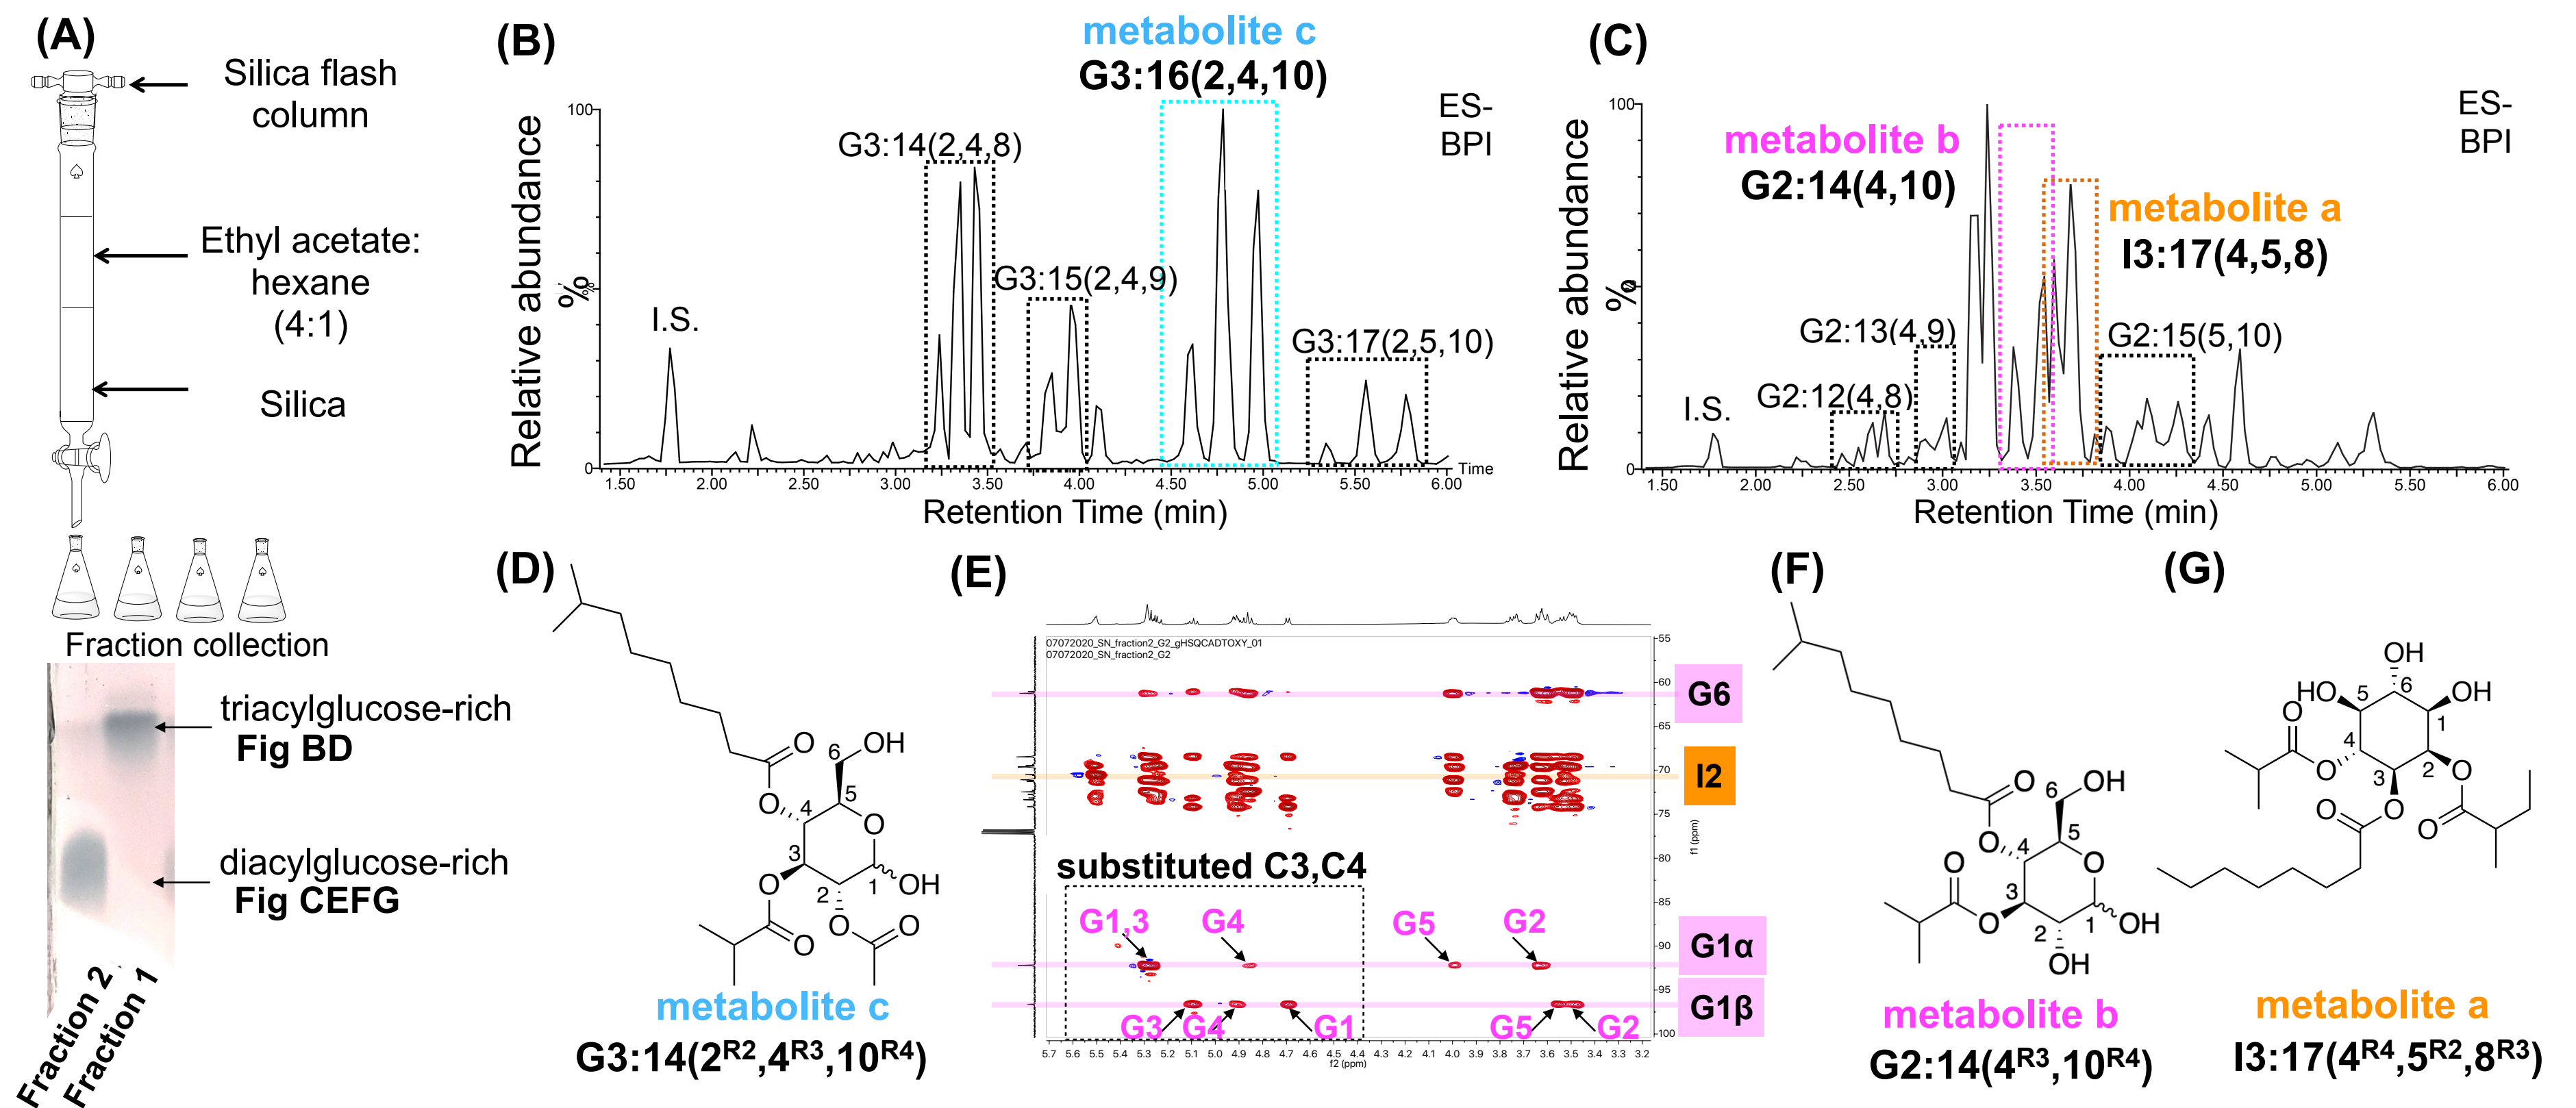

Figure 2



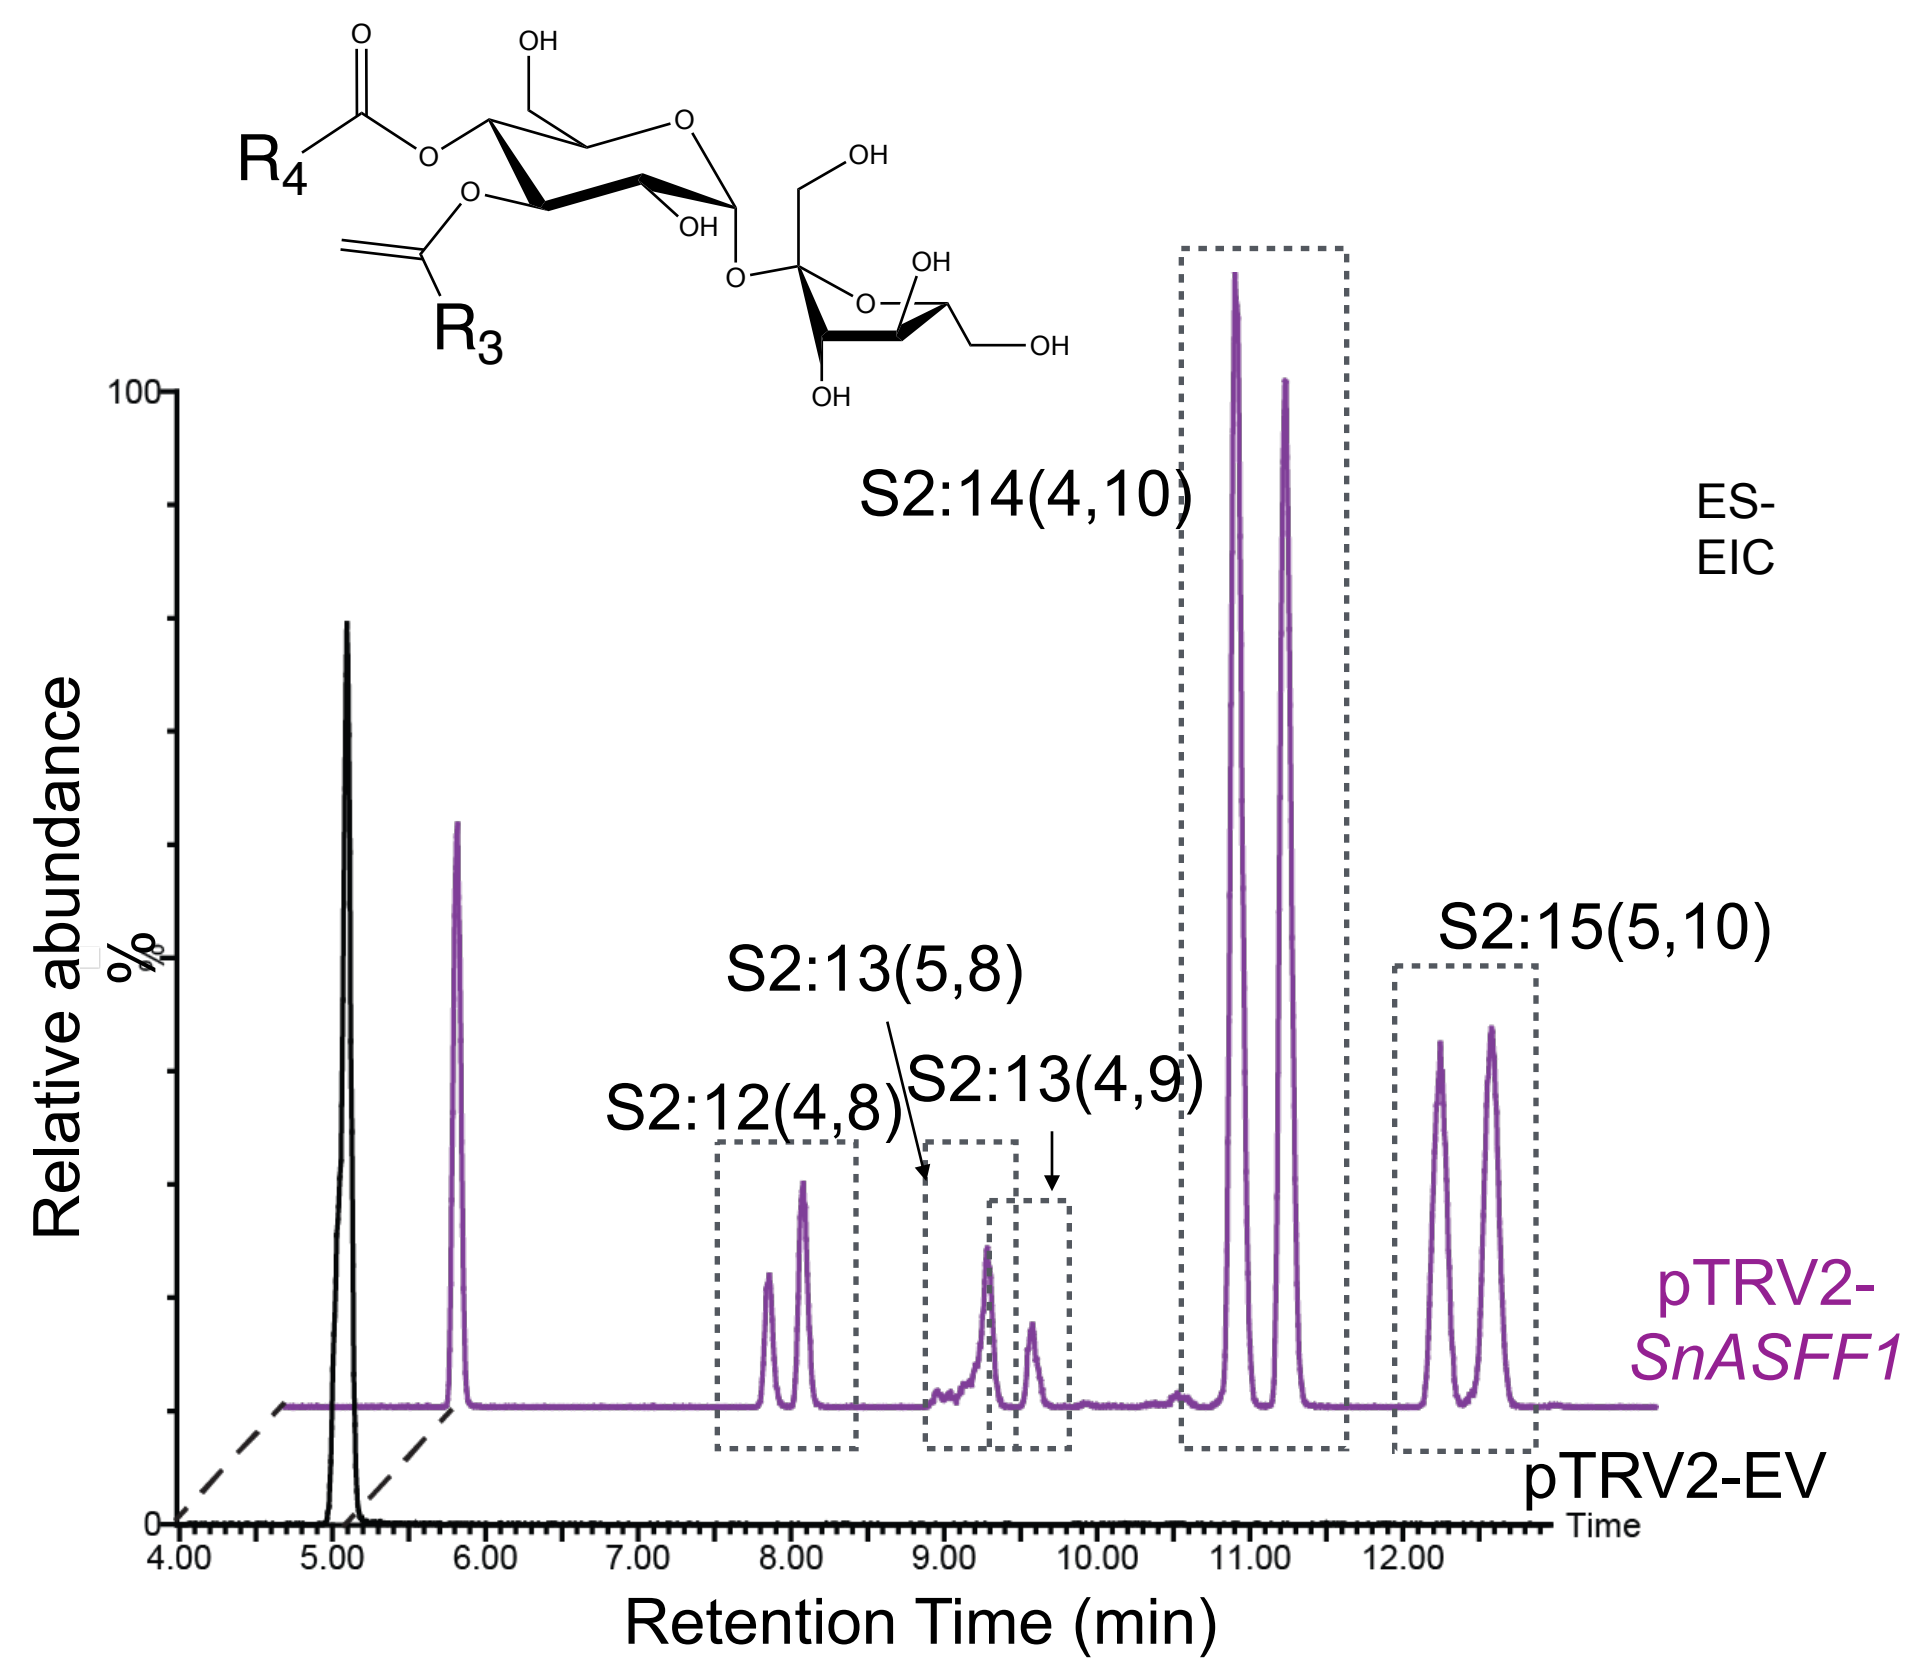

Figure 3

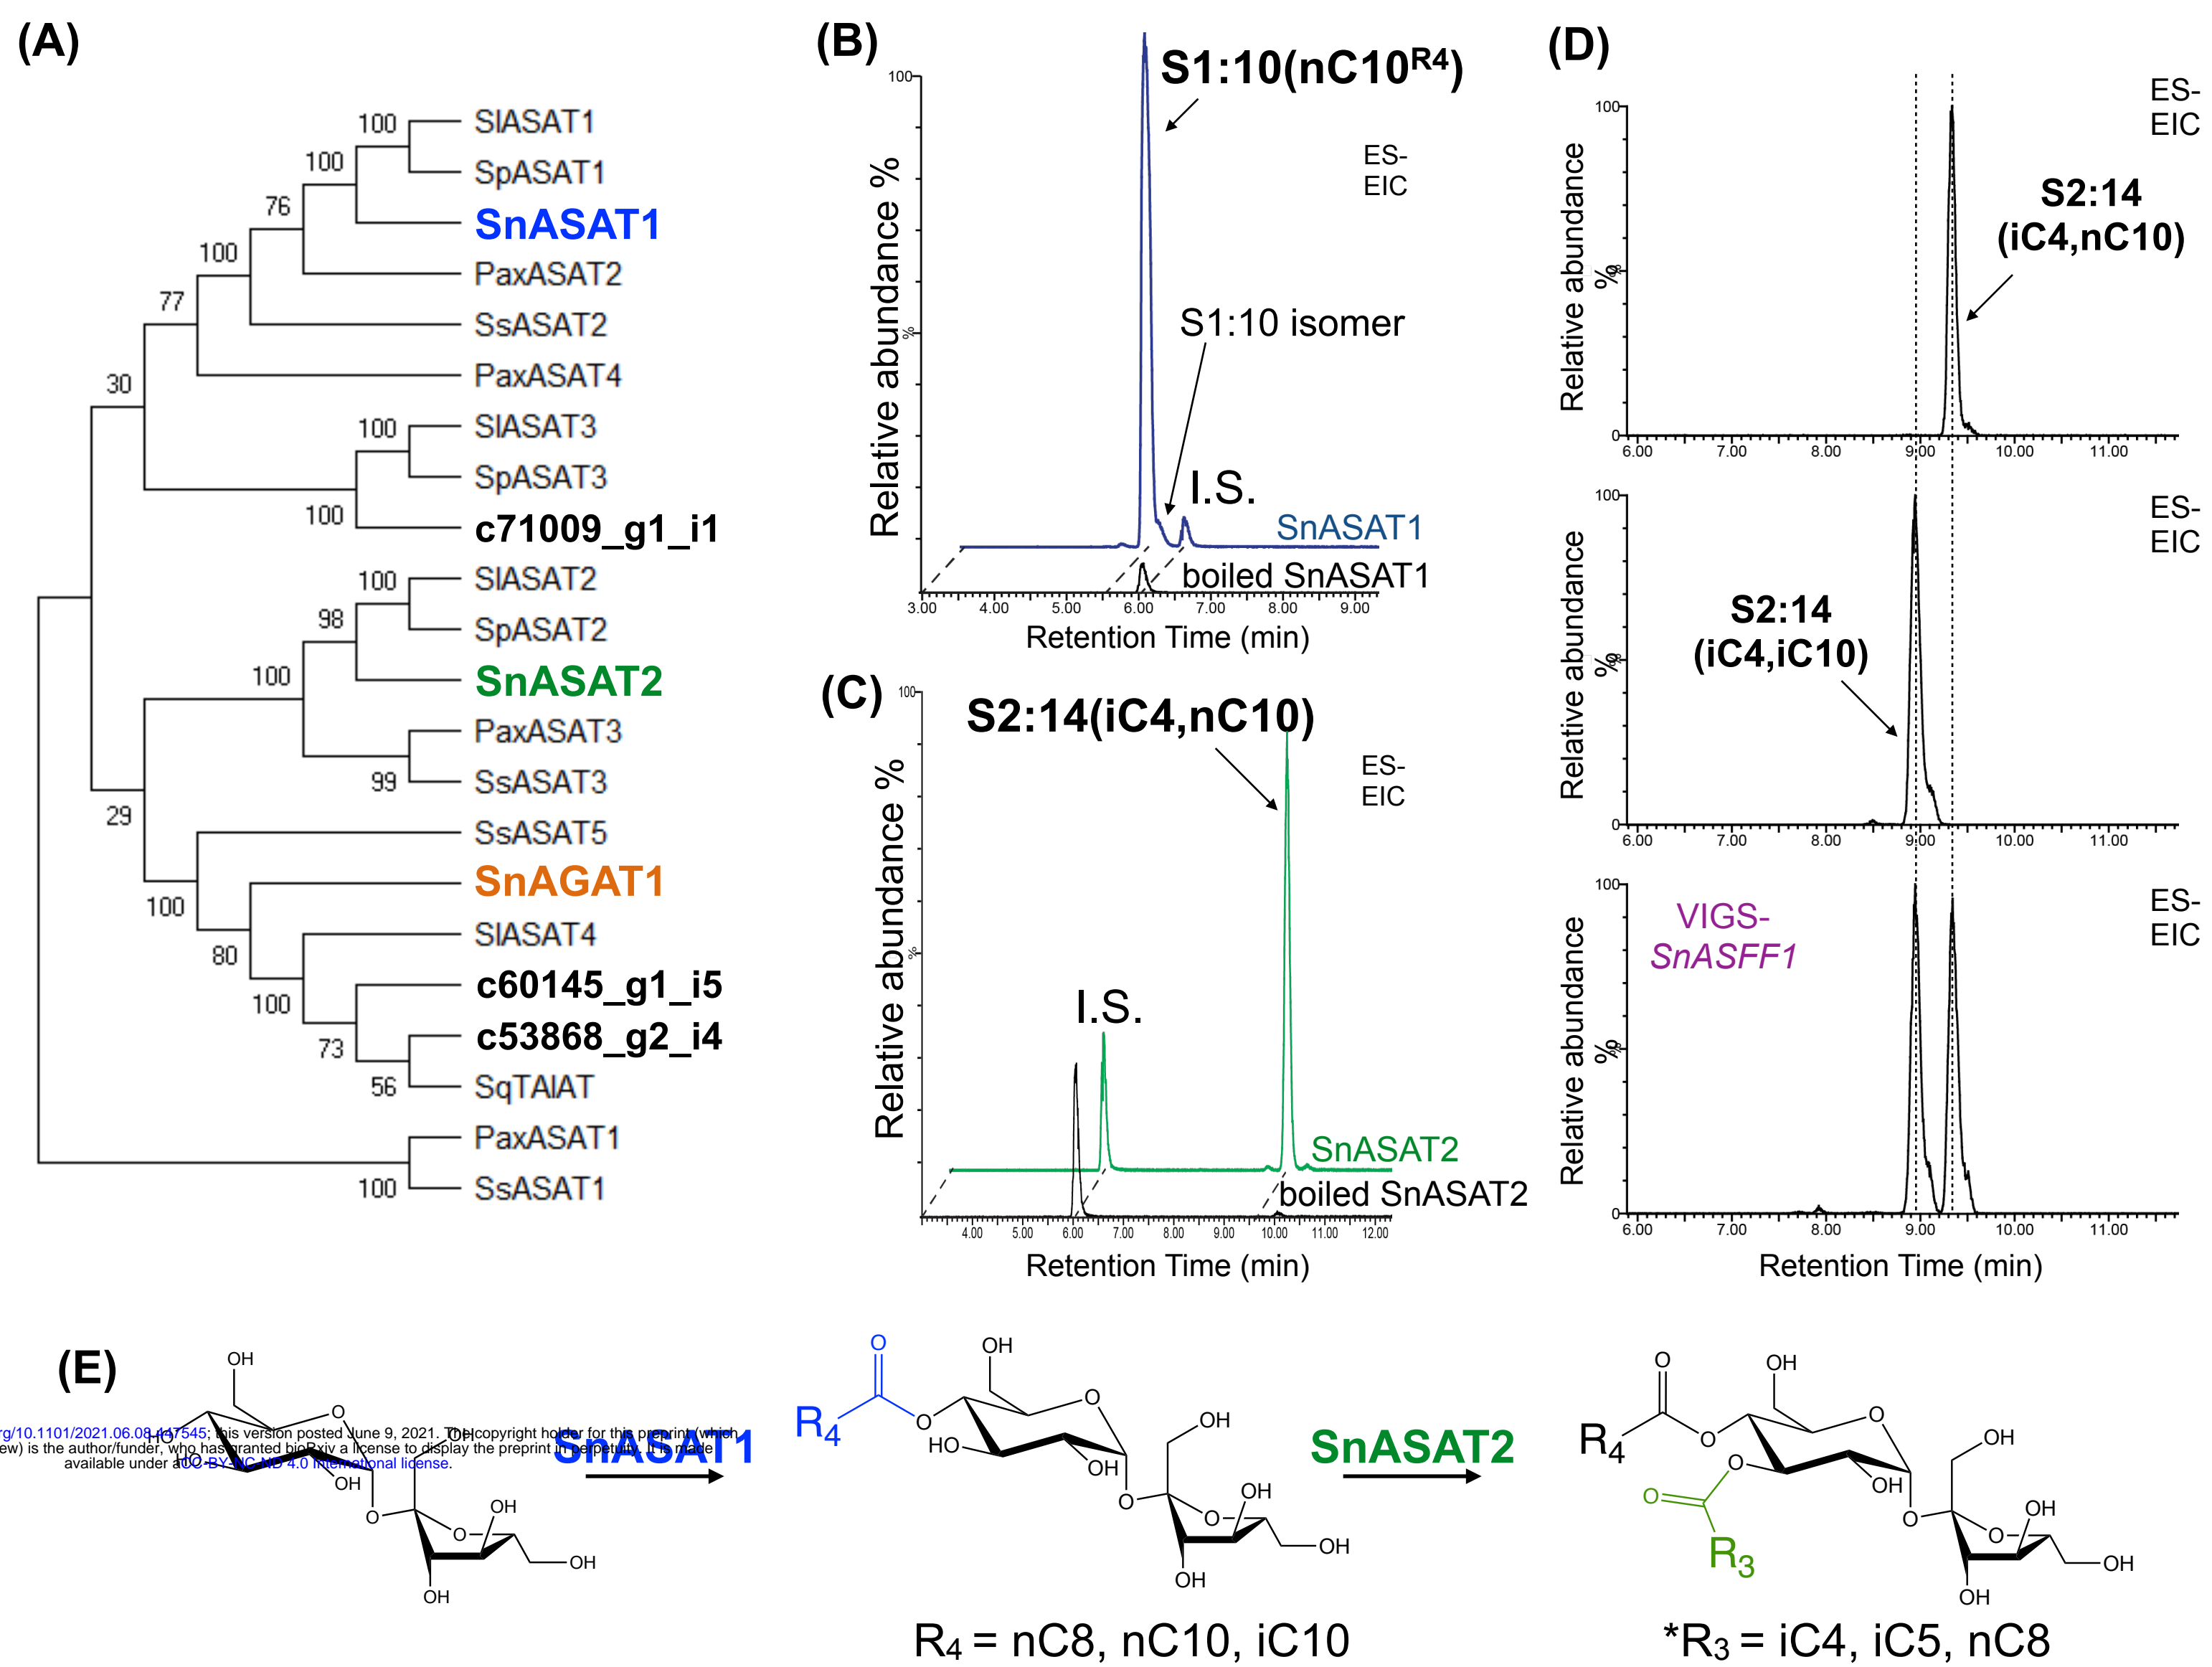

Figure 4



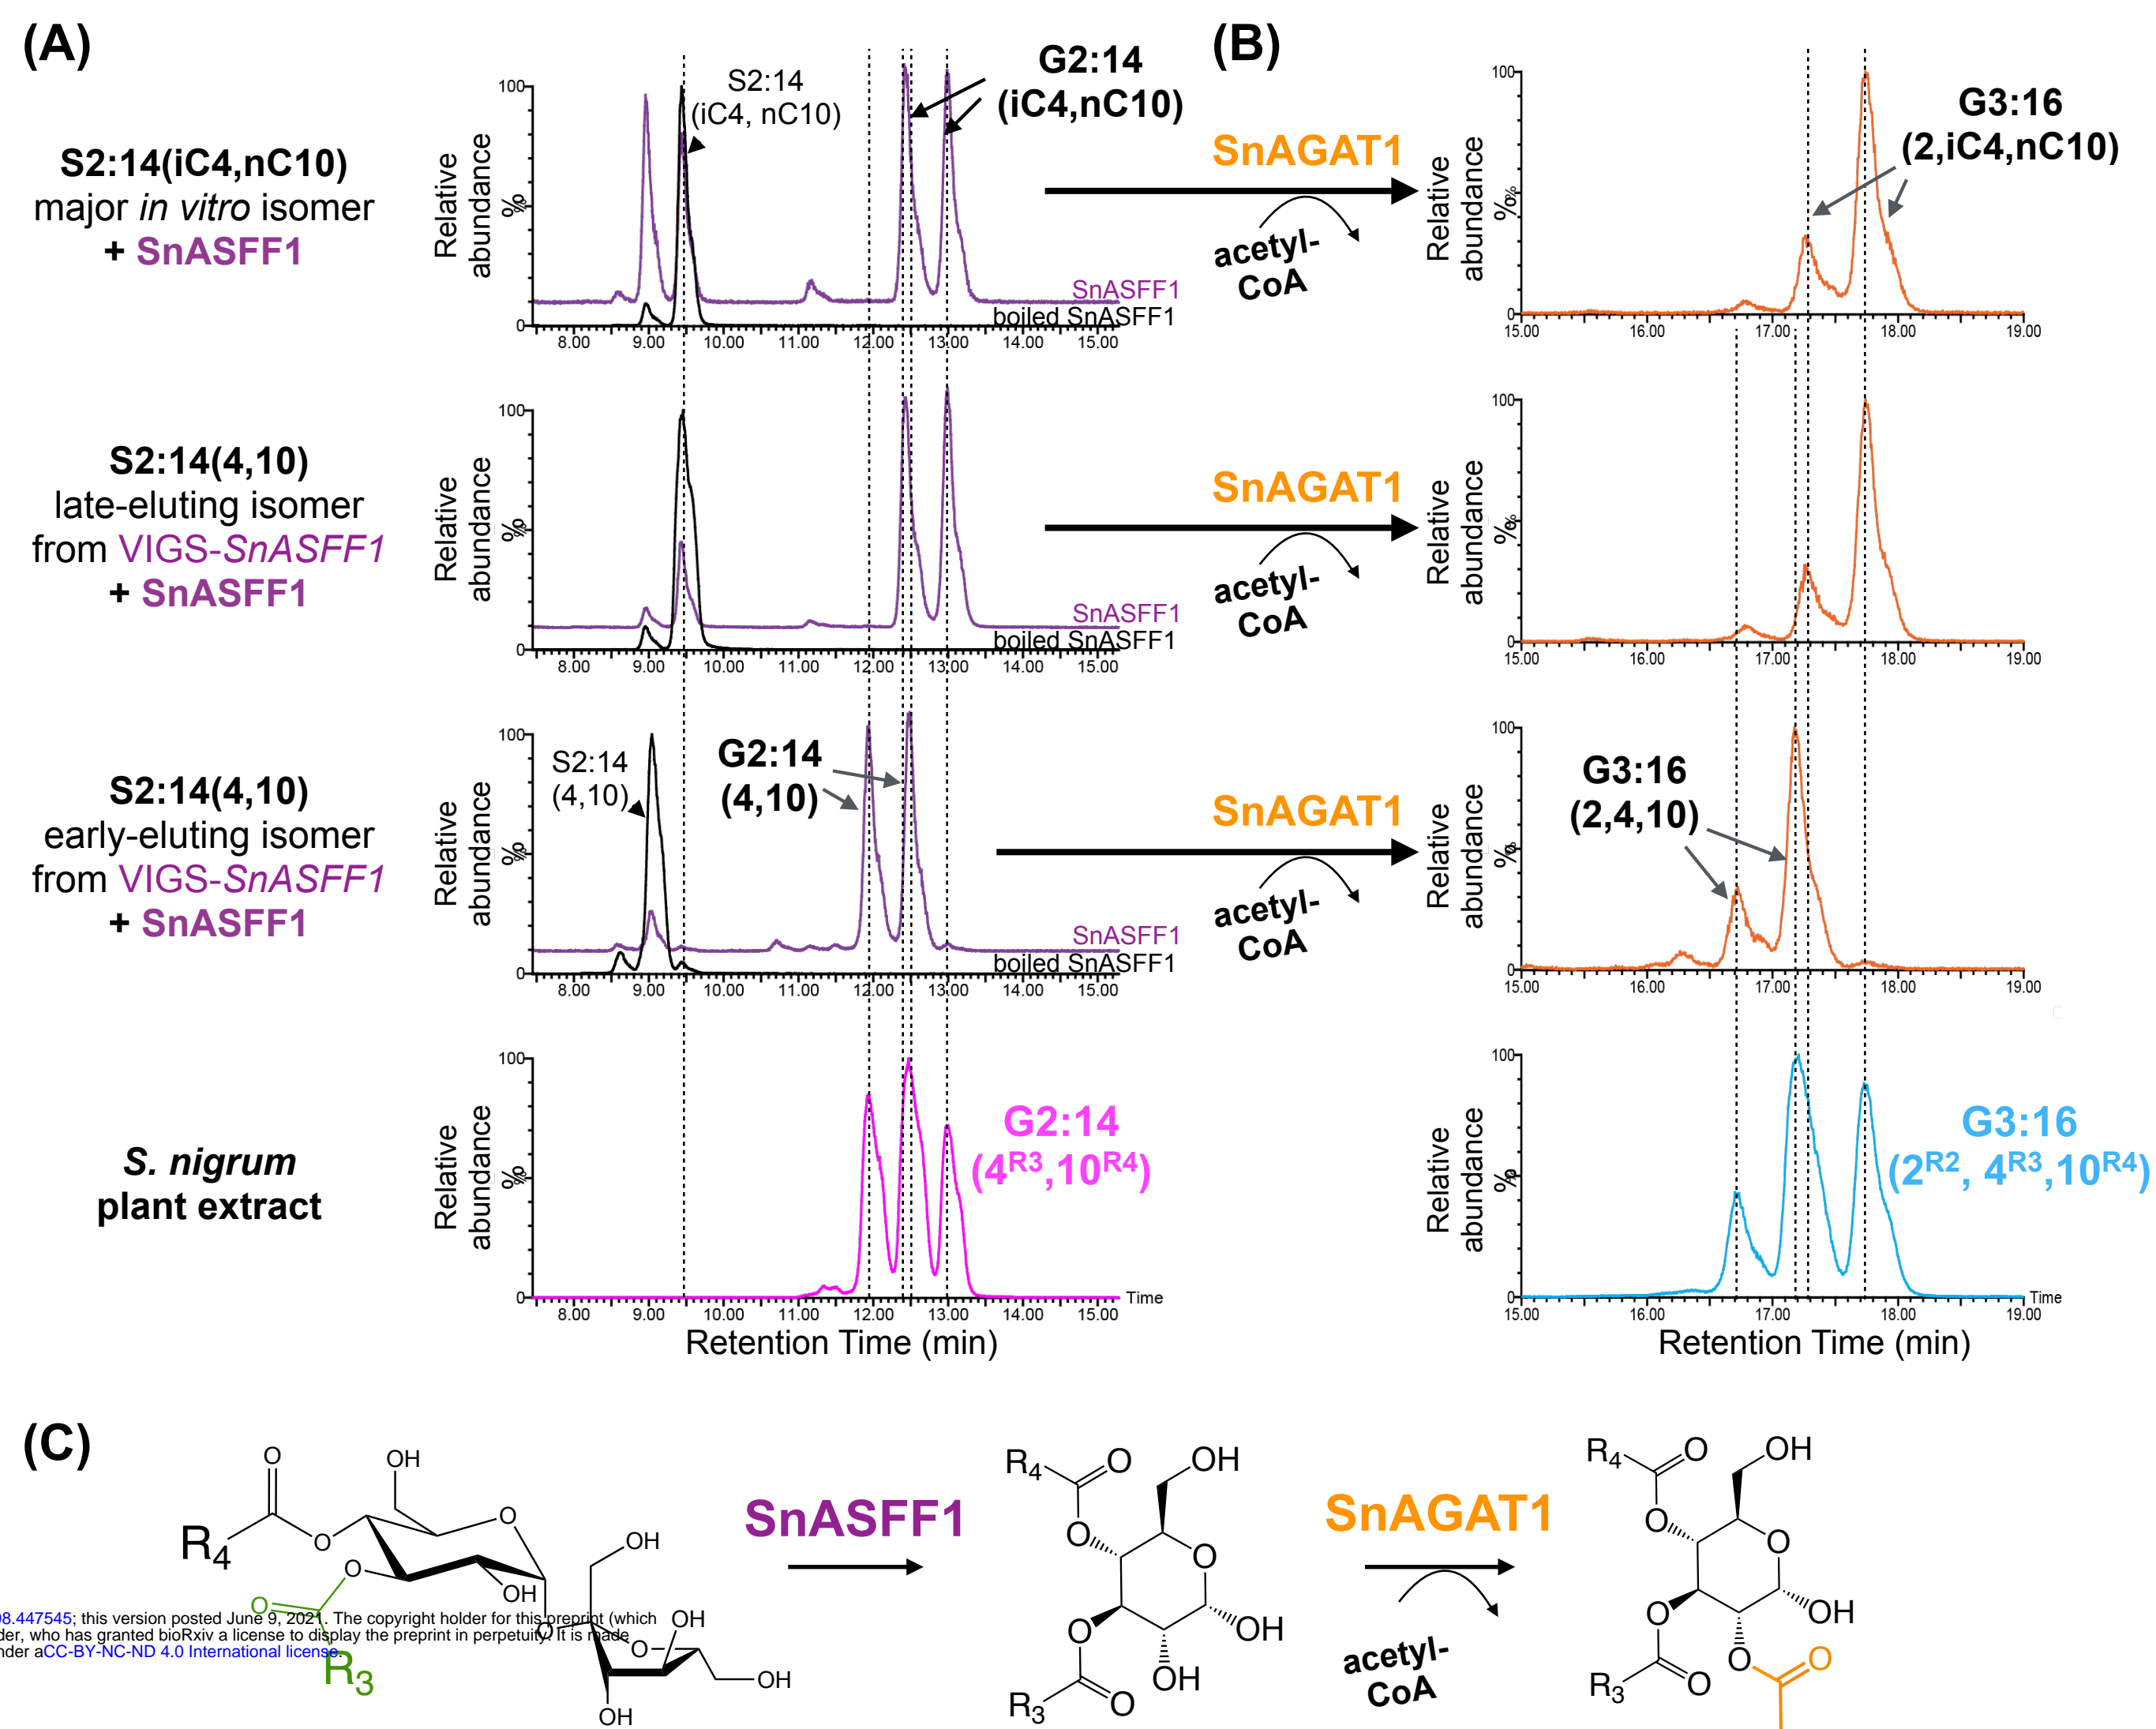

Figure 5

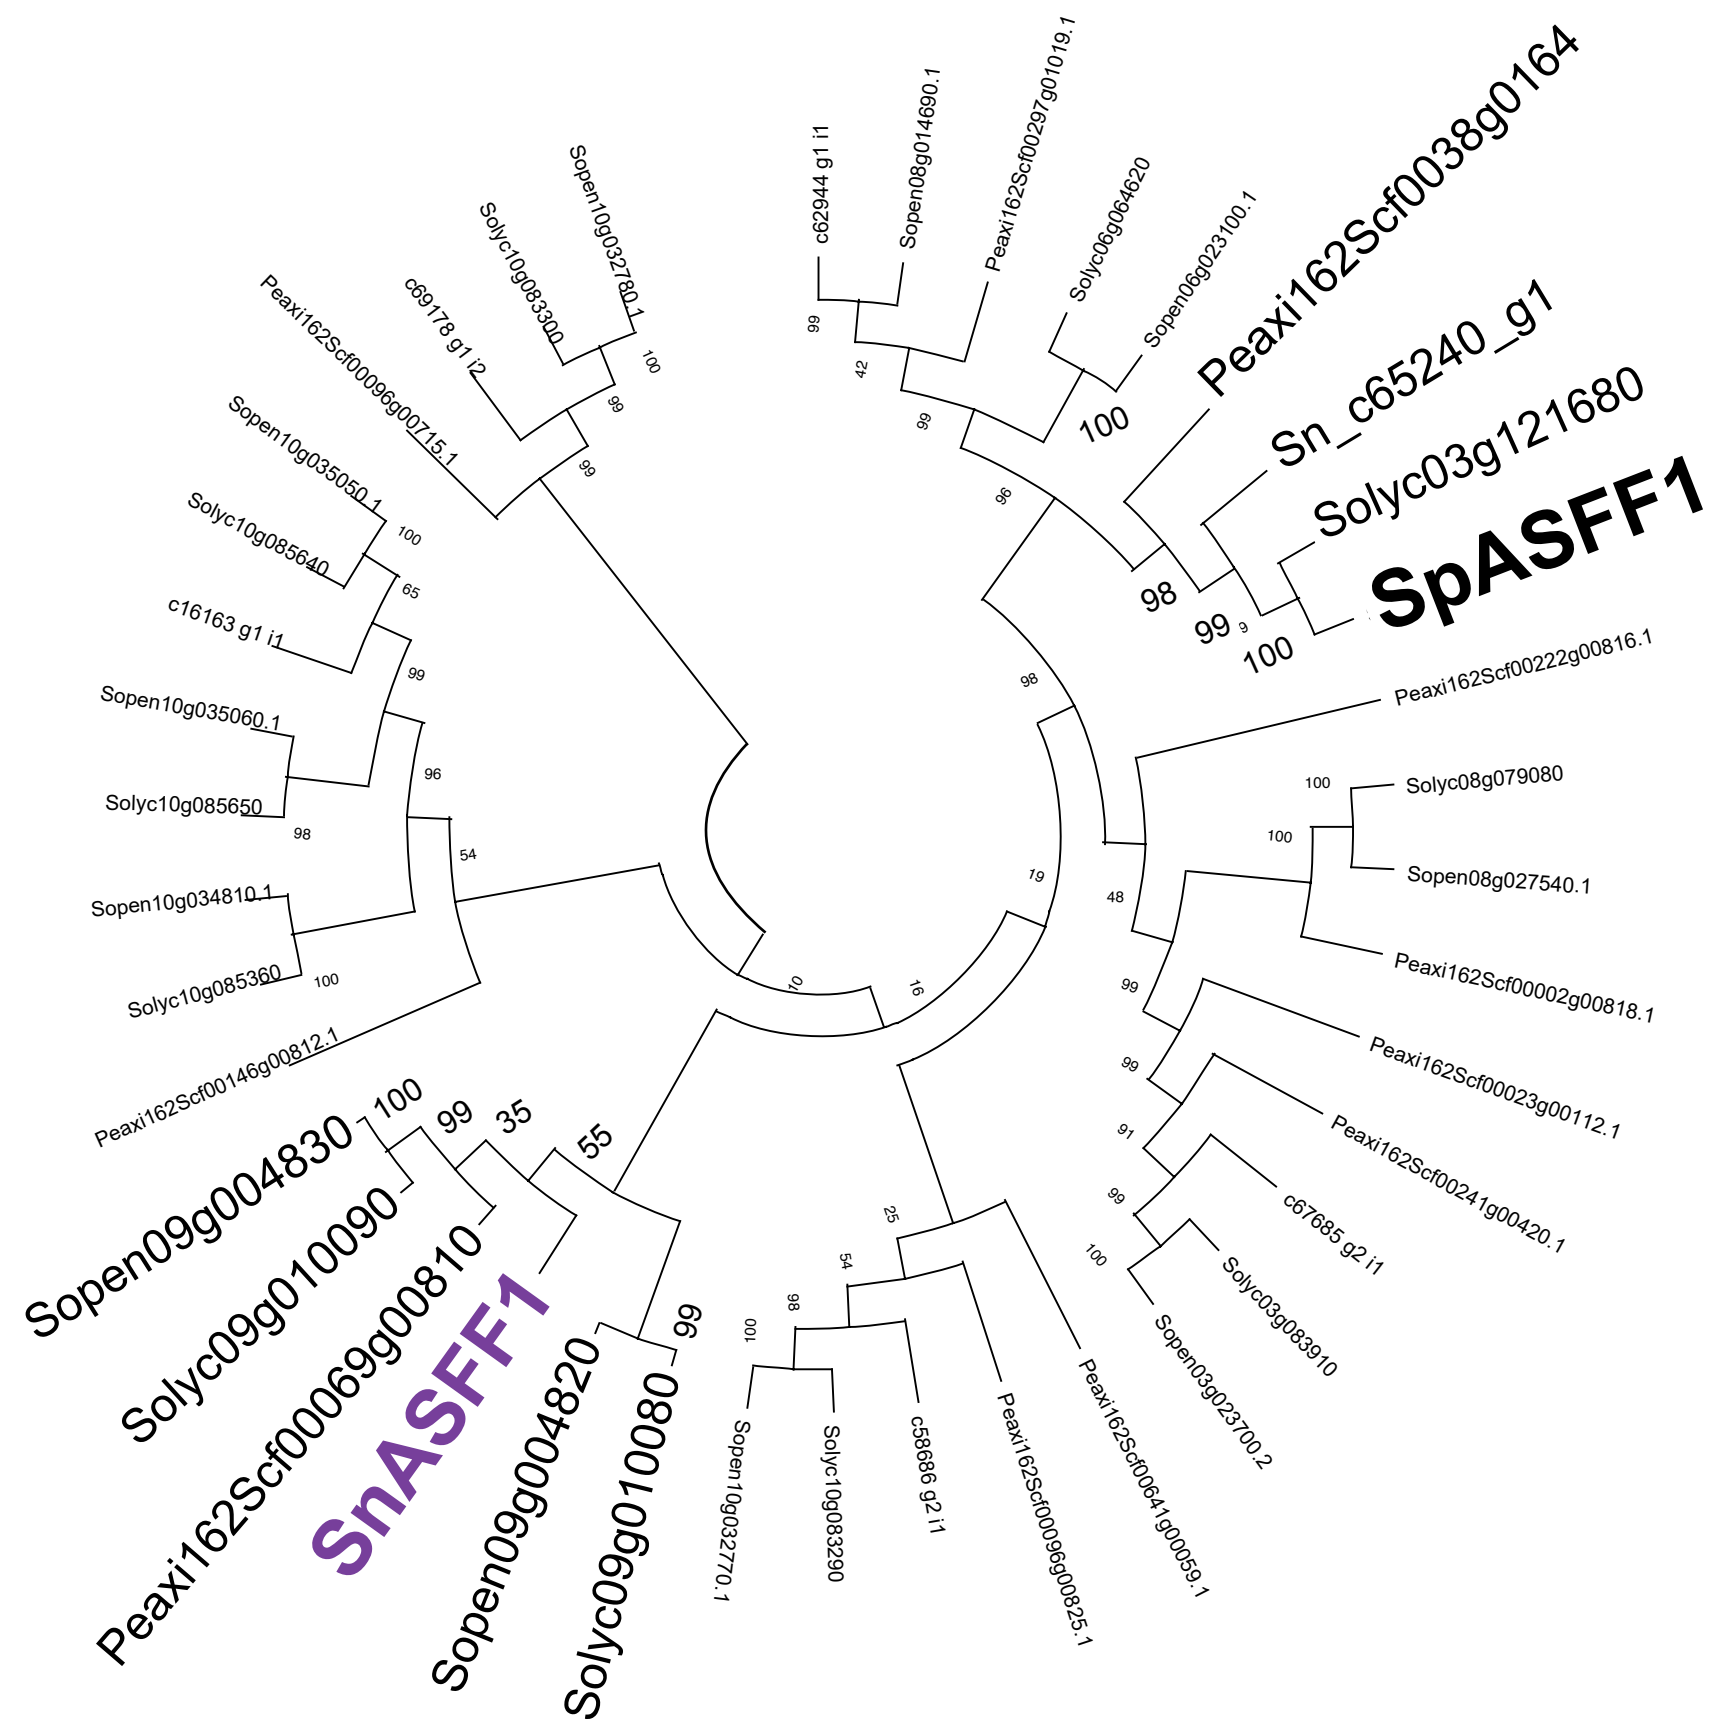

bioRxiv preprint doi: <https://doi.org/10.1101/2021.06.08.447545>; this version posted June 9, 2021. The copyright holder for this preprint (which was not certified by peer review) is the author/funder, who has granted bioRxiv a license to display the preprint in perpetuity. It is made available under aCC-BY-NC-ND 4.0 International license.

Figure 6

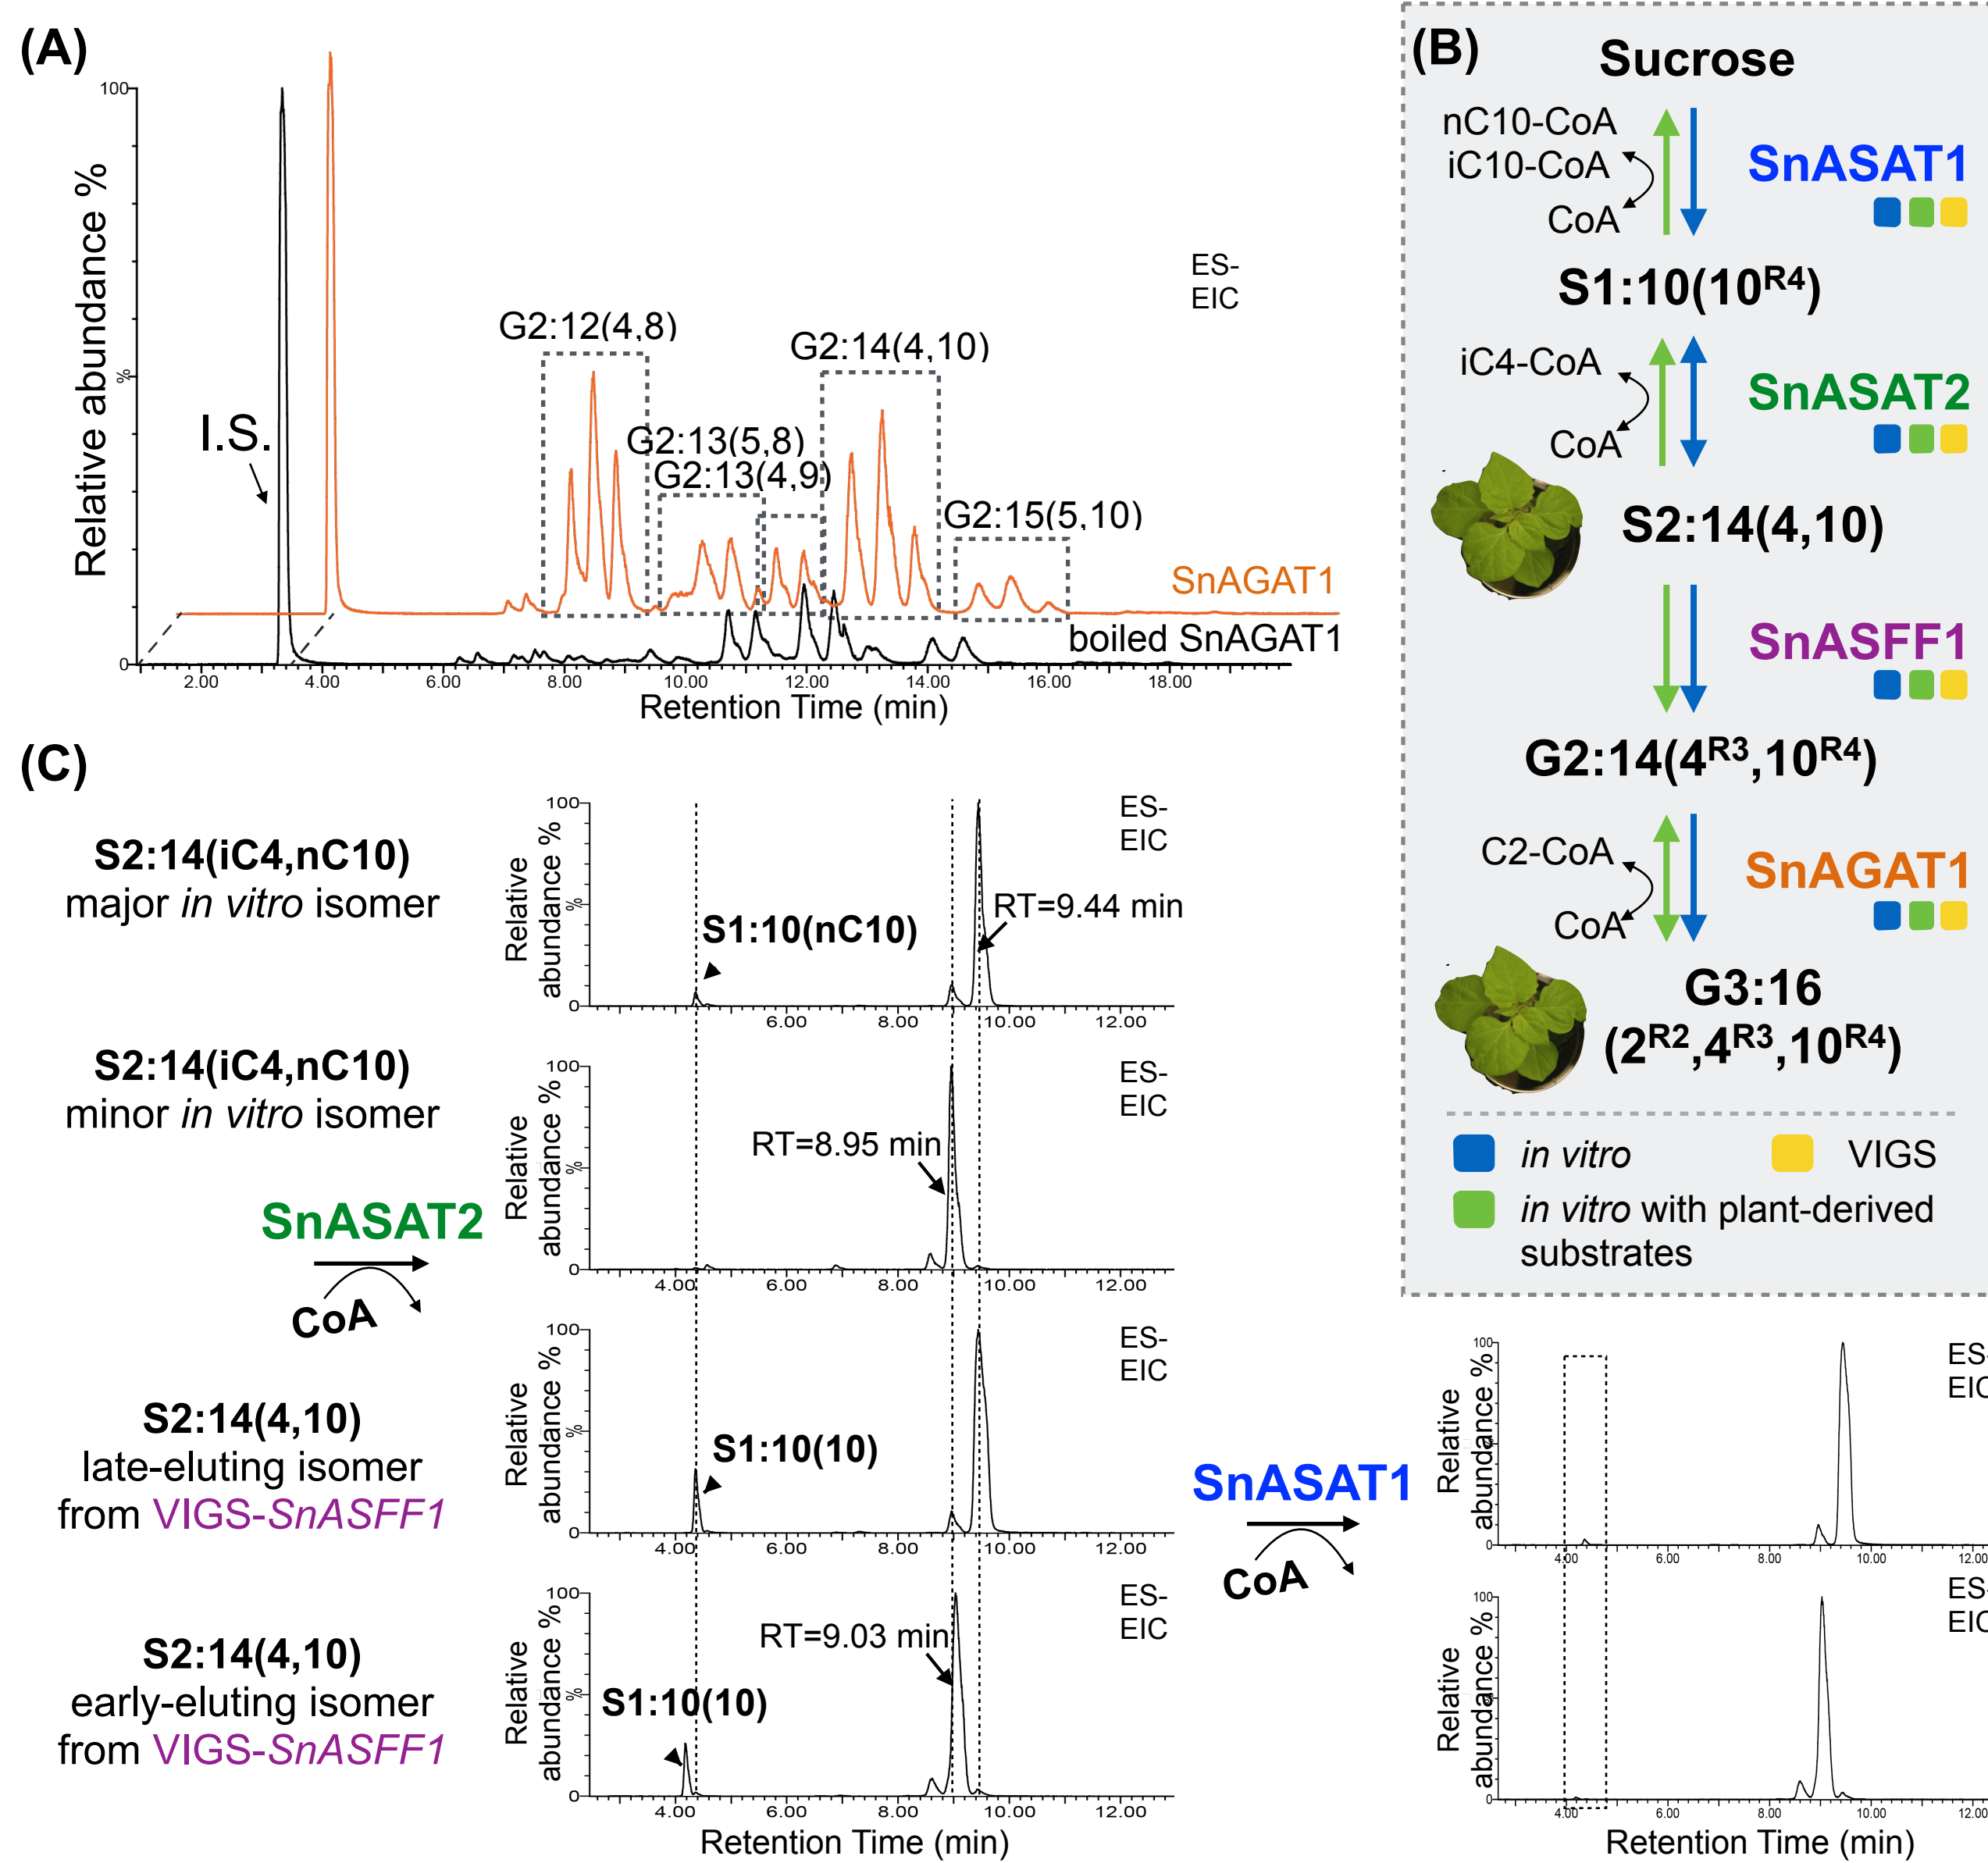

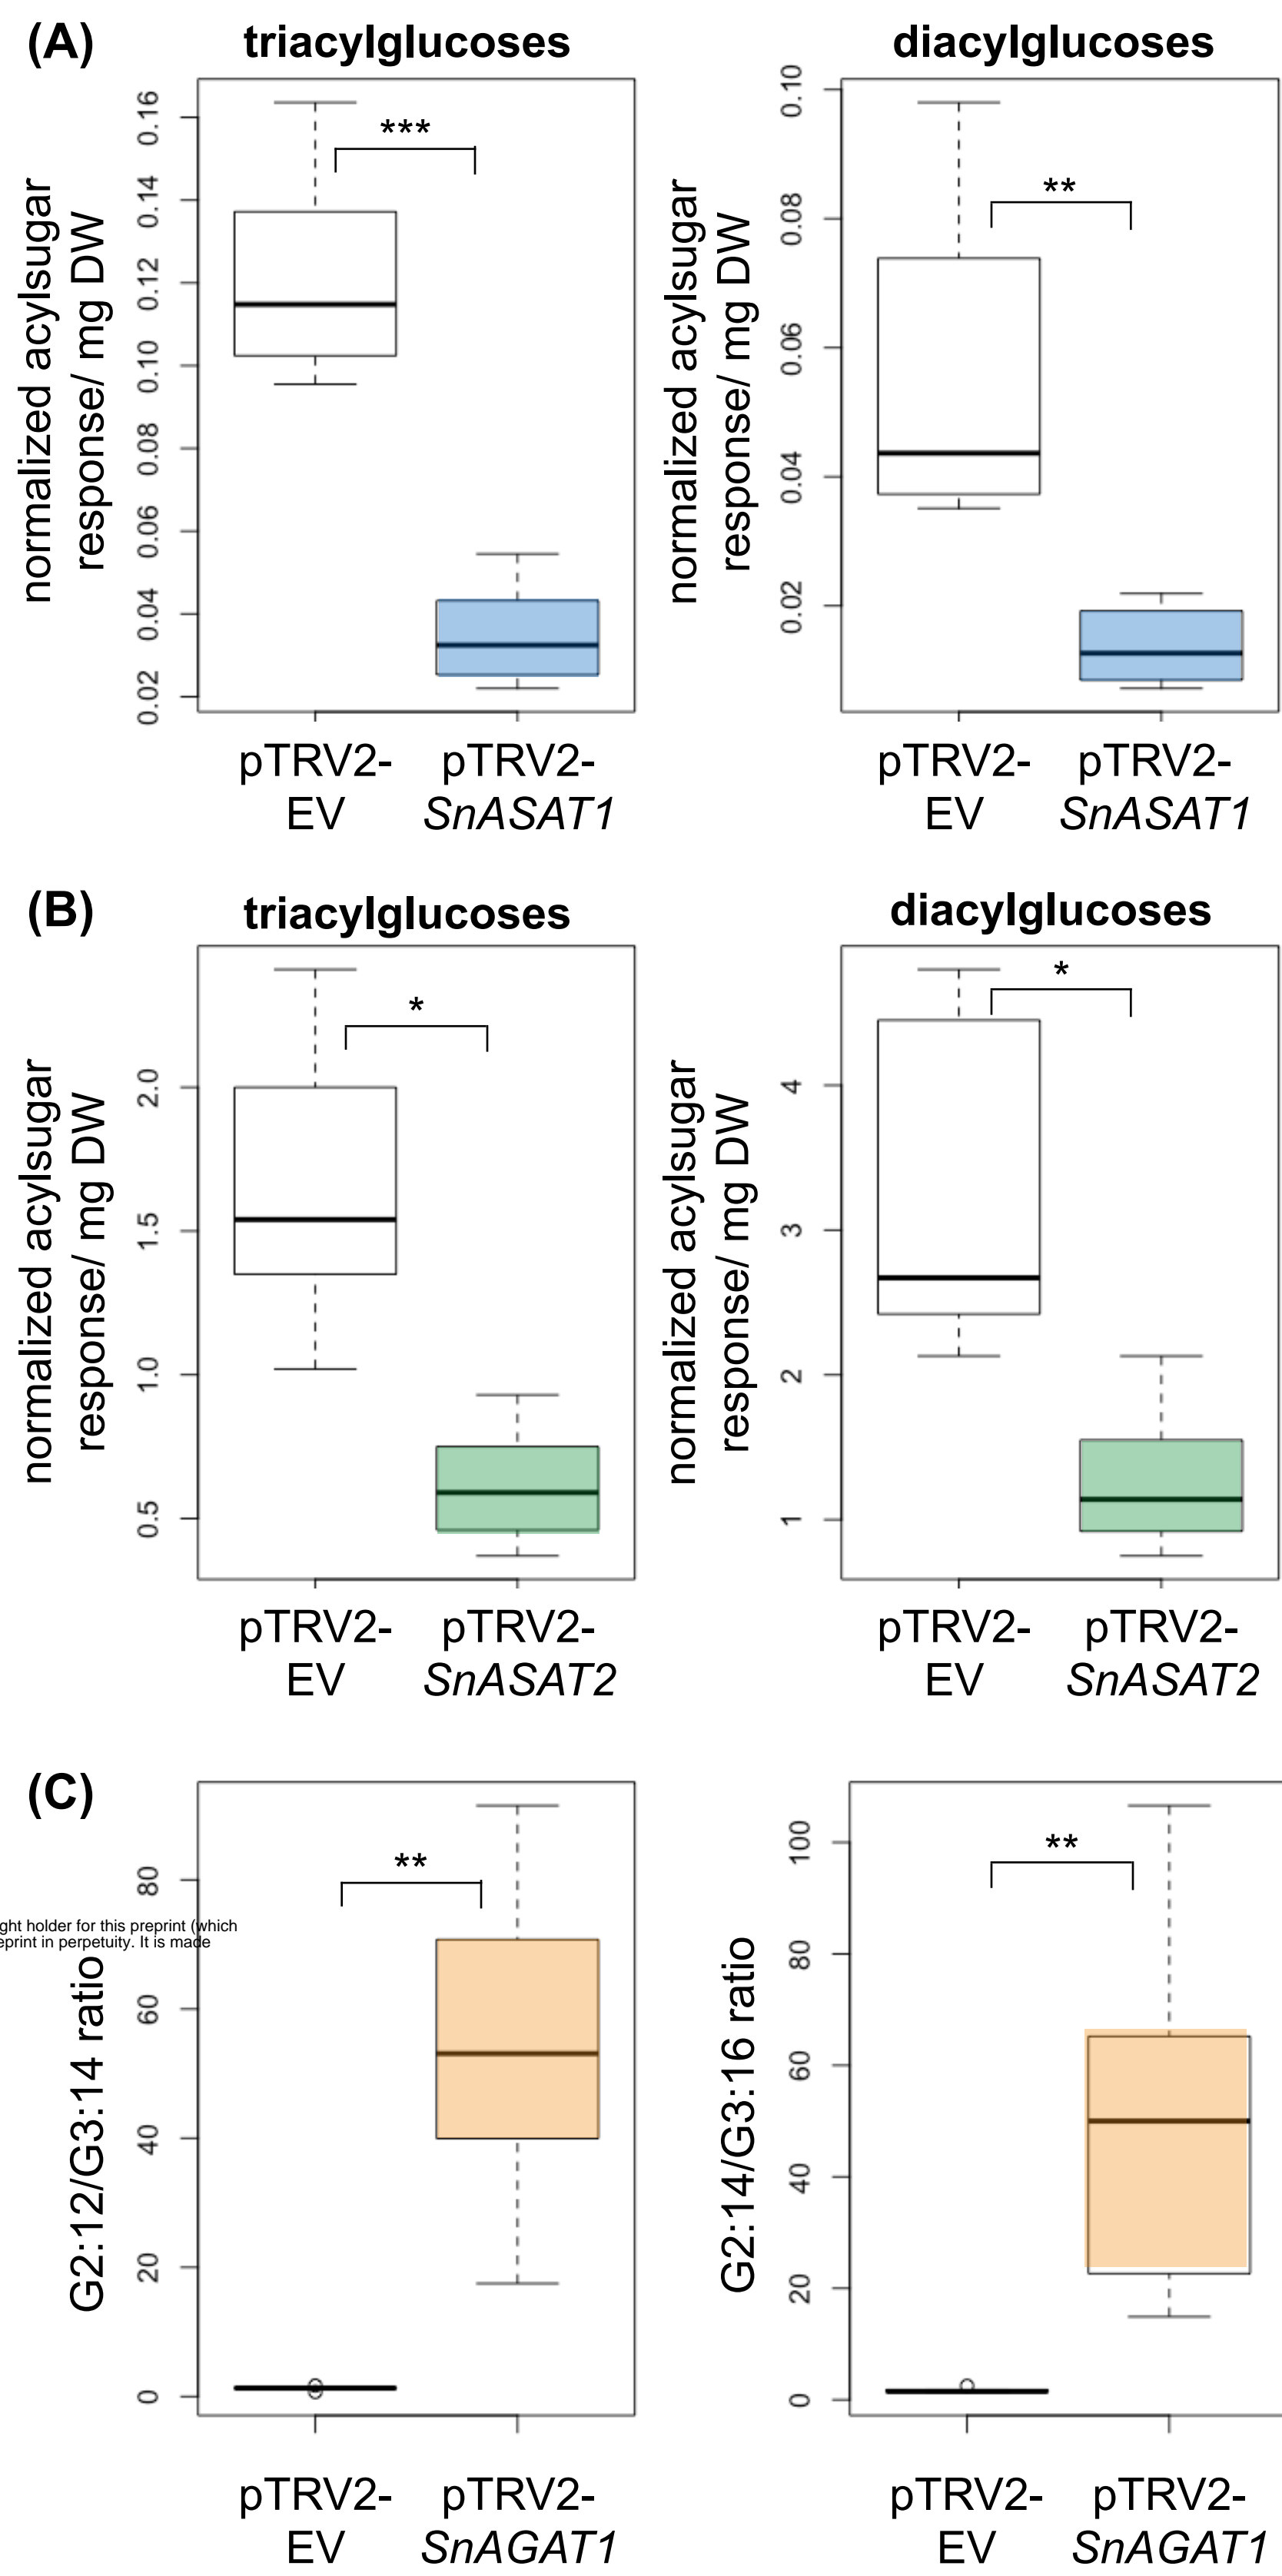

Figure 8

## Supplementary Text

### Acylsugar annotation

Acylsugar structures were inferred from positive and negative mode MS collision-induced dissociation (CID) as previously described (15, 29, 32, 34). In short, we employed two discrete negative mode CIDs, where the lower energy (15V) removes acyl chains from acylsugars in a stepwise manner and the higher energy (30V) creates fatty acid fragment ions from acylsugar acyl chains. For acylsucroses, the broken glycosidic linkage by positive mode CID (15 or 30V) provided additional information about acyl chain attachment: a neutral loss of the furanose ring resulting in  $[M+NH_4-FRUC]^+$  accumulation would indicate that all acyl chains are attached to the glucopyranose ring. Ring acylation information is indicated in Table S11. Examples of typical fragmentation of *S. nigrum* di- and triacylglucoses and triacylinositols are depicted in Fig. S2, whereas examples of mass spectra of the mono- and di-acylsucrose intermediates on acylglucose biosynthetic pathways are depicted in Fig. S7C and S9.

Below is the stepwise protocol with a list of criteria used in this manuscript to annotate and report acylsugars with different confidence levels. Putative acylhexoses that meet all the following criteria A-F were annotated with highest confidence in this manuscript. Those not meeting criteria E and/or F were reported with medium confidence, whereas potential acylhexoses that only meet criteria A were reported with low confidence. Confidence levels for each reported acylhexose are specified in Table S11.

- (A) **Exact mass.** Experimental exact masses of potential acylsugars ( $m/z$  listed in Table S11) were compared with theoretical exact masses of possible acylsugars. A mass difference within 10 ppm met this criterion. Then, we generated extracted ion chromatograms (EICs) of each potential acylsugar to compare with the EICs generated in B and C.
- (B) **Presence of co-eluting sugar core fragments.** For acylglucoses, EICs of characteristic glucose core structure ( $m/z$  127.04 in 15 or 30V positive mode CID and  $m/z$  143.03 in 0V negative mode CID) were generated. For acylsucroses, EICs for the sugar core structure on acylsucroses ( $m/z$  341.10 and 323.09 in negative mode) were generated. As acylinositols fragment less well in negative mode, the characteristic *myo*-inositol core fragment ion ( $m/z$  127.04) was used to generate EICs in positive mode CID (30V).
- (C) **Presence of co-eluting fatty acid carboxylate fragments in high CID potential (30V).** EICs of the carboxylate fragments of C4 ( $m/z$  87.04), C5 ( $m/z$  101.06), unsaturated C5 ( $m/z$  99.05), C6 ( $m/z$  115.07), C7 ( $m/z$  129.09), C8 ( $m/z$  143.10), C9 ( $m/z$  157.12), C10 ( $m/z$  171.14), C11 ( $m/z$  185.15) and C12 ( $m/z$  199.17) were generated in highest CID potential (30V) in negative mode.
- (D) **Presence of co-eluting fragments that correspond to stepwise loss of acyl chains.** The EICs generated in (A), (B) and (C) were closely examined for co-eluting peaks that indicate potential acylsugars. For each potential acylsugar, spectra from the top of the peak were then carefully examined for stepwise losses of acyl chains in negative mode CID at 15V. Acylinositol fragmentation for this criterion was observed in positive mode due to poor negative mode fragmentation<sup>5,6</sup>.



- (E) **Confirmed by MS/MS.** The above annotation were then confirmed with data-dependent (DDA) MS/MS when applicable.
- (F) **Consistency across samples.** Acylsugar presence was monitored across multiple metabolite extracts. Potential acylsugars met this criterion when they were detected across all samples analyzed.

As an example, the three peaks with  $m/z$  491.25 with retention time 52.66, 53.22 and 54.02 min on the 110-min share identical ( $\delta_m = 0.1$  ppm) with the  $[M+\text{formate}]^-$  of H3:16 (Fig. S3A). To confidently annotate these peaks, co-elution of  $[M+\text{formate}]^-$  ( $m/z$  491.25) and glucose fragment ion ( $m/z$  143.03) was verified on EICs generated in 0V negative mode. Co-eluting carboxylate anion were identified for C10 carboxylate anion ( $m/z$  171.14) and C4 carboxylate anion ( $m/z$  87.04) in 30V negative mode. Presence of C4 and C10 acyl chains was further confirmed by ion abundance of  $[M-C4-H_2O]^-$  ( $m/z$  357.19) and  $[M-C4-C10-2H_2O]^-$  ( $m/z$  185.04) on CID at 15V negative mode. As these fragmentation were confirmed on MS/MS fragmentation of  $[M+\text{formate}]^-$  ( $m/z$  491.25), we report the three peaks between 52-55 min with  $m/z$  491.25 as triacylhexoses H3:16(2,4,10) with high confidence level based on LC-MS data.

(A)

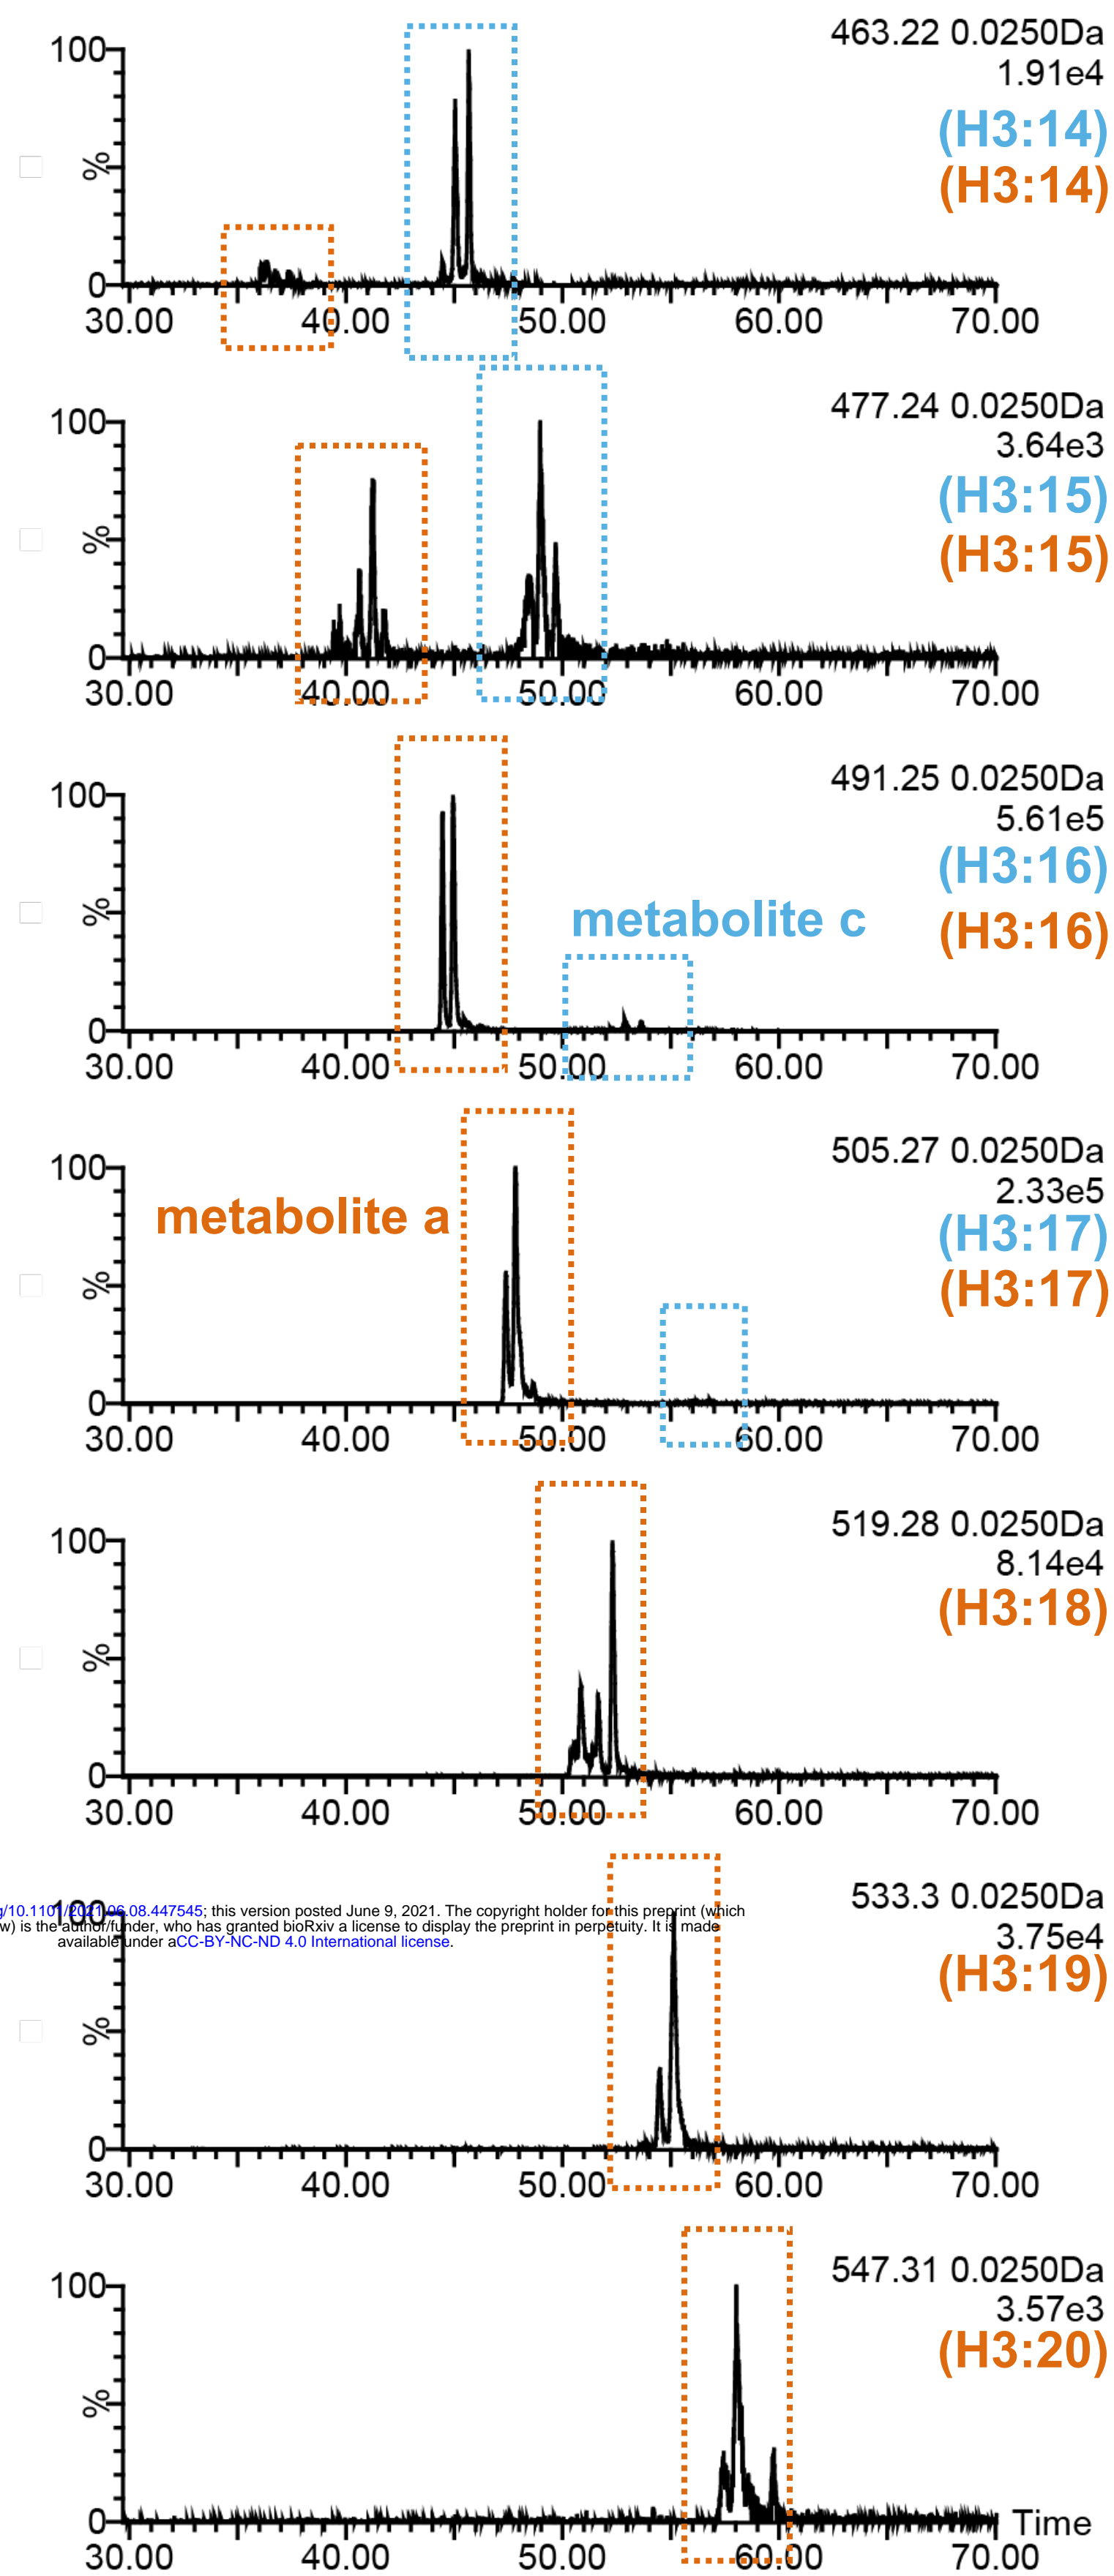

(B)

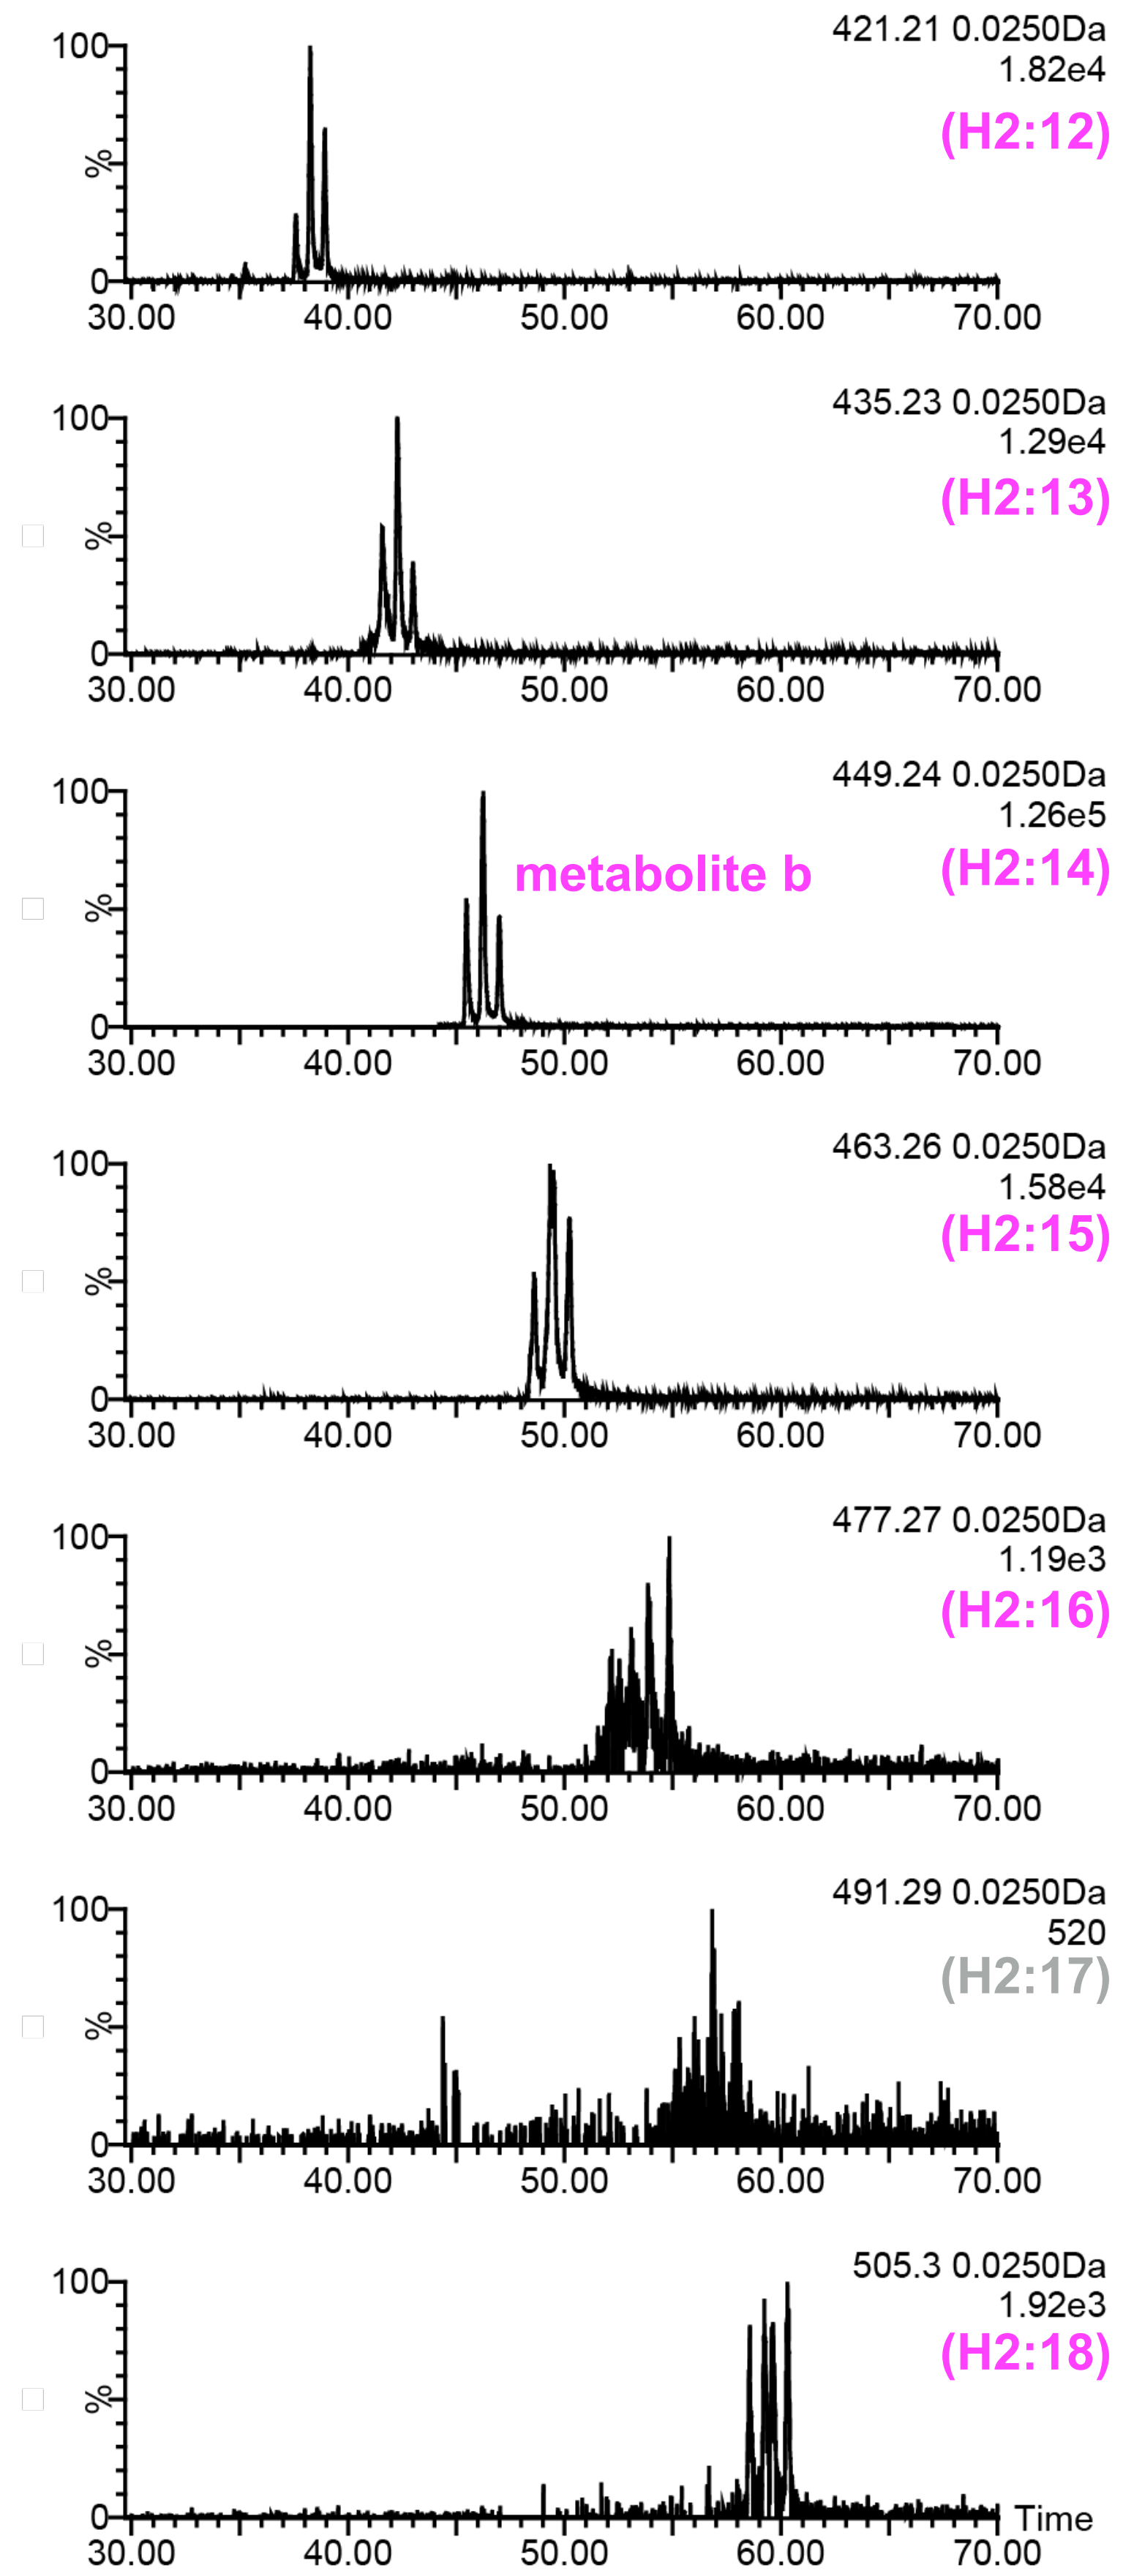

bioRxiv preprint doi: <https://doi.org/10.1101/2021.06.09.447545>; this version posted June 9, 2021. The copyright holder for this preprint (which was not certified by peer review) is the author/funder, who has granted bioRxiv a license to display the preprint in perpetuity. It is made available under aCC-BY-NC-ND 4.0 International license.

**Fig. S1. Chromatographs of abundant acylhexoses in *S. nigrum*.** (A) Extracted ion chromatograms (EICs) from negative ion mode LC-MS analyses showing selected  $m/z$  values correspond to  $[M+\text{formate}]^-$  of hexose triesters. Observed peaks in these chromatograms separate into two distinct retention time groups: peaks corresponding to triacylglucoses, such as metabolite c, are highlighted with cyan dash boxes, and those corresponding to triacylinositols, such as metabolite a, are highlighted in orange dash boxes. (B) Extracted ion chromatograms from negative ion mode LC-MS analyses showing selected  $m/z$  values correspond to  $[M+\text{formate}]^-$  of hexose diesters. Numerous instances suggested common chromatographic overlap of isomeric acylhexoses was common. The corresponding  $m/z$  of these compounds are listed in Table S1 and Supplementary Text.



**(A) Metabolite c**  
**G3:16(2,4,10) ( $m/z$  491.25 in ESI- and 464.29 in ESI+)**

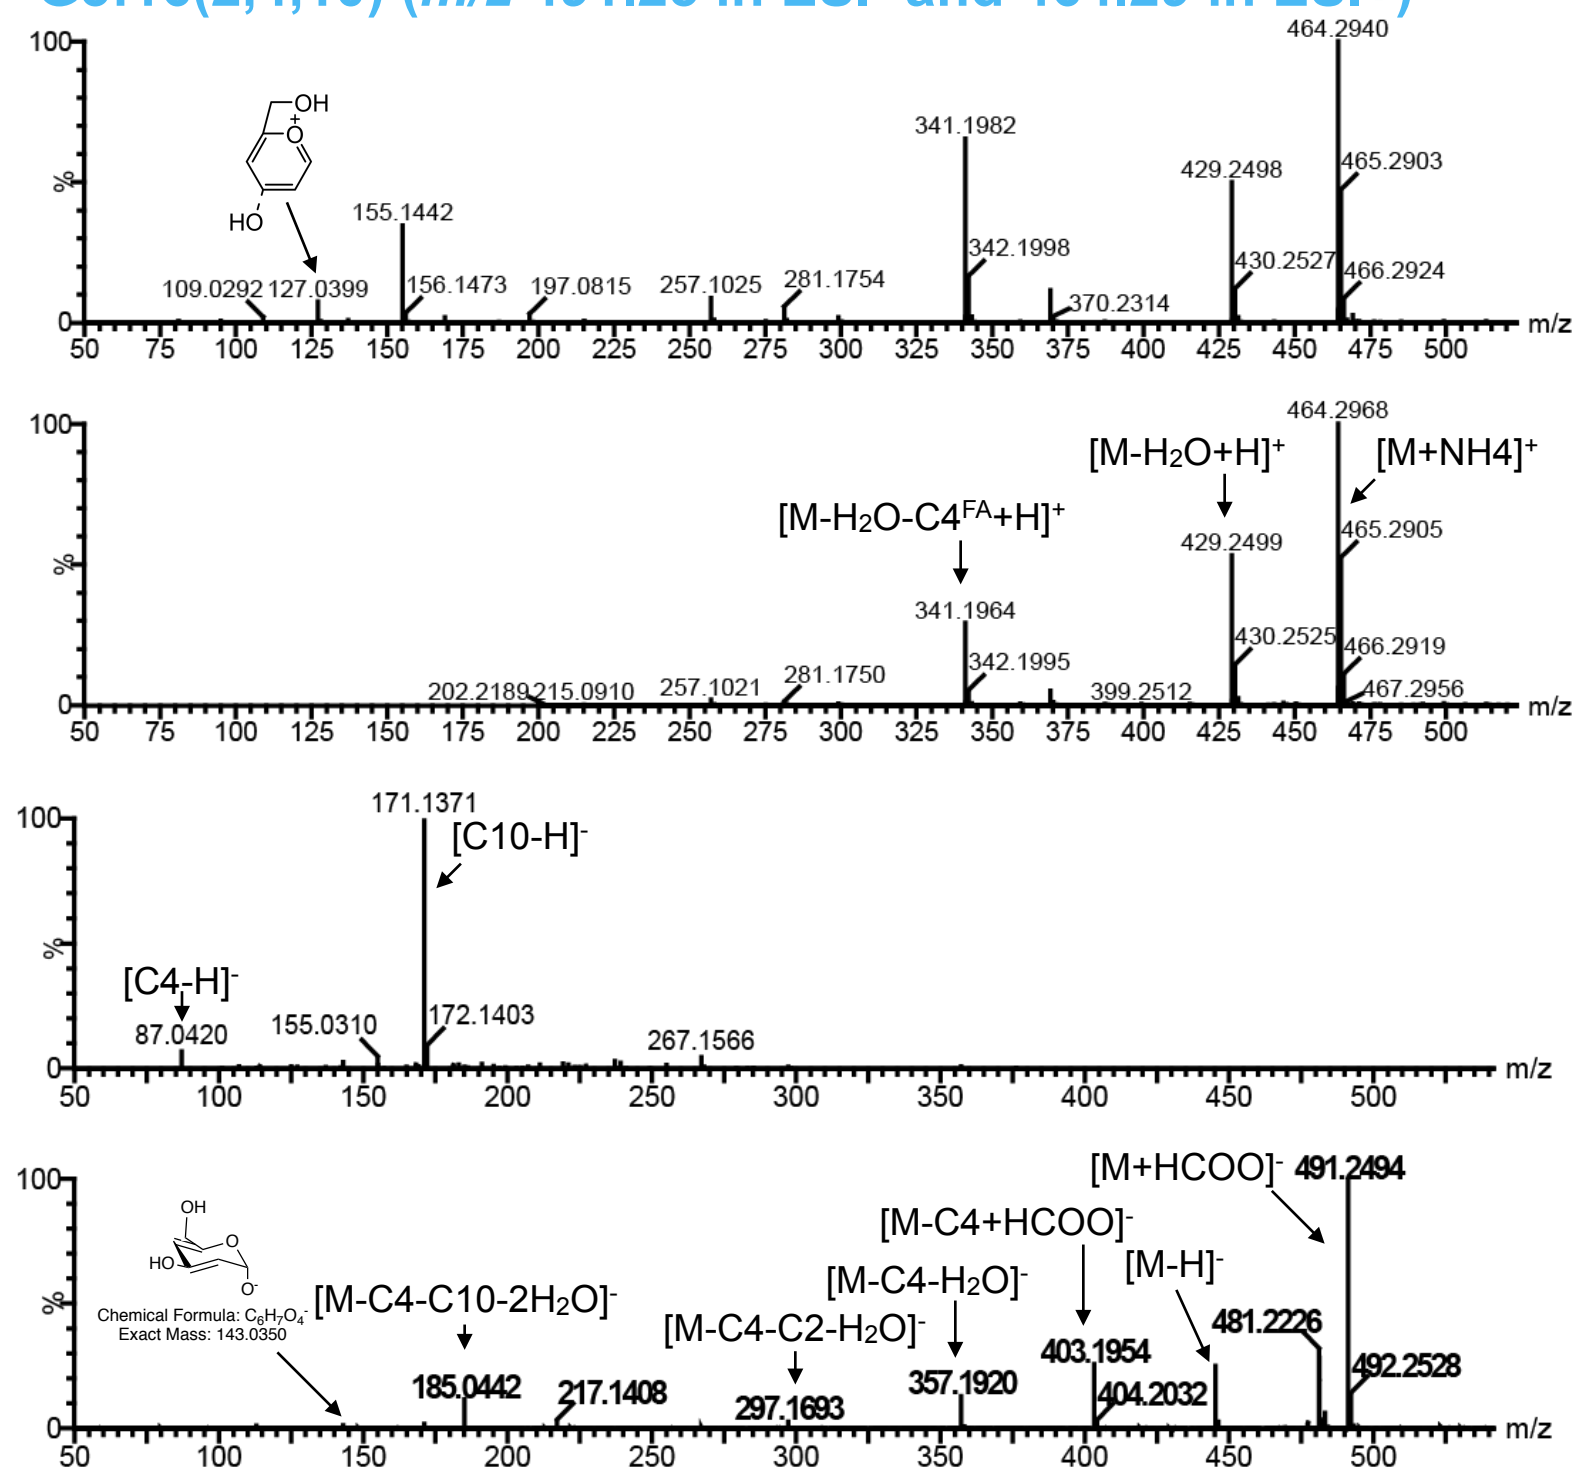

**G3:14(2,4,8) ( $m/z$  463.22 in ESI- and 436.25 in ESI+)**

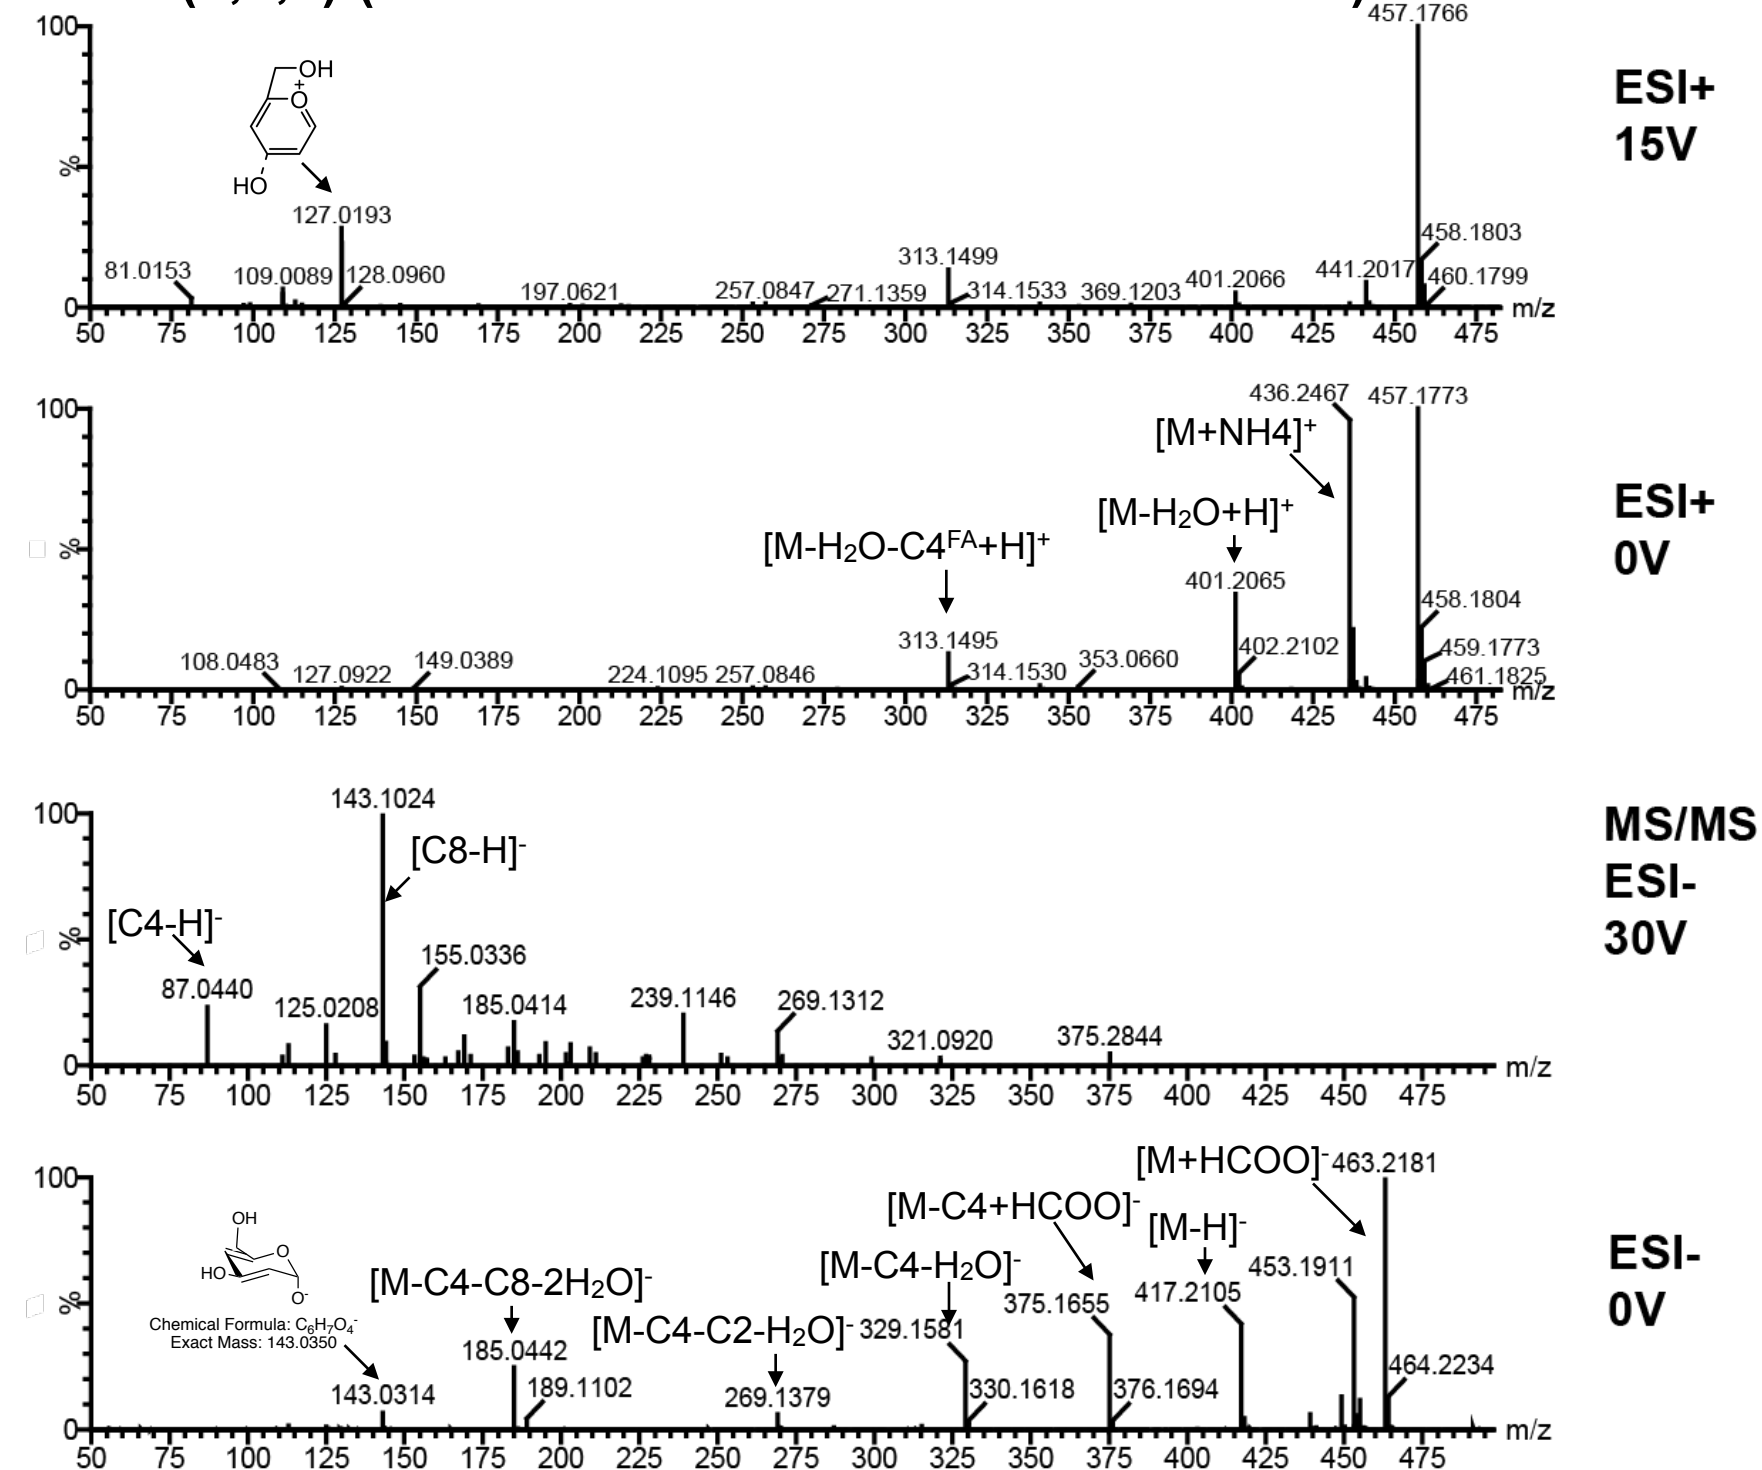

**(B) Metabolite b**  
**G2:14(4,10) ( $m/z$  449.24 in ESI- and 422.27 in ESI+)**

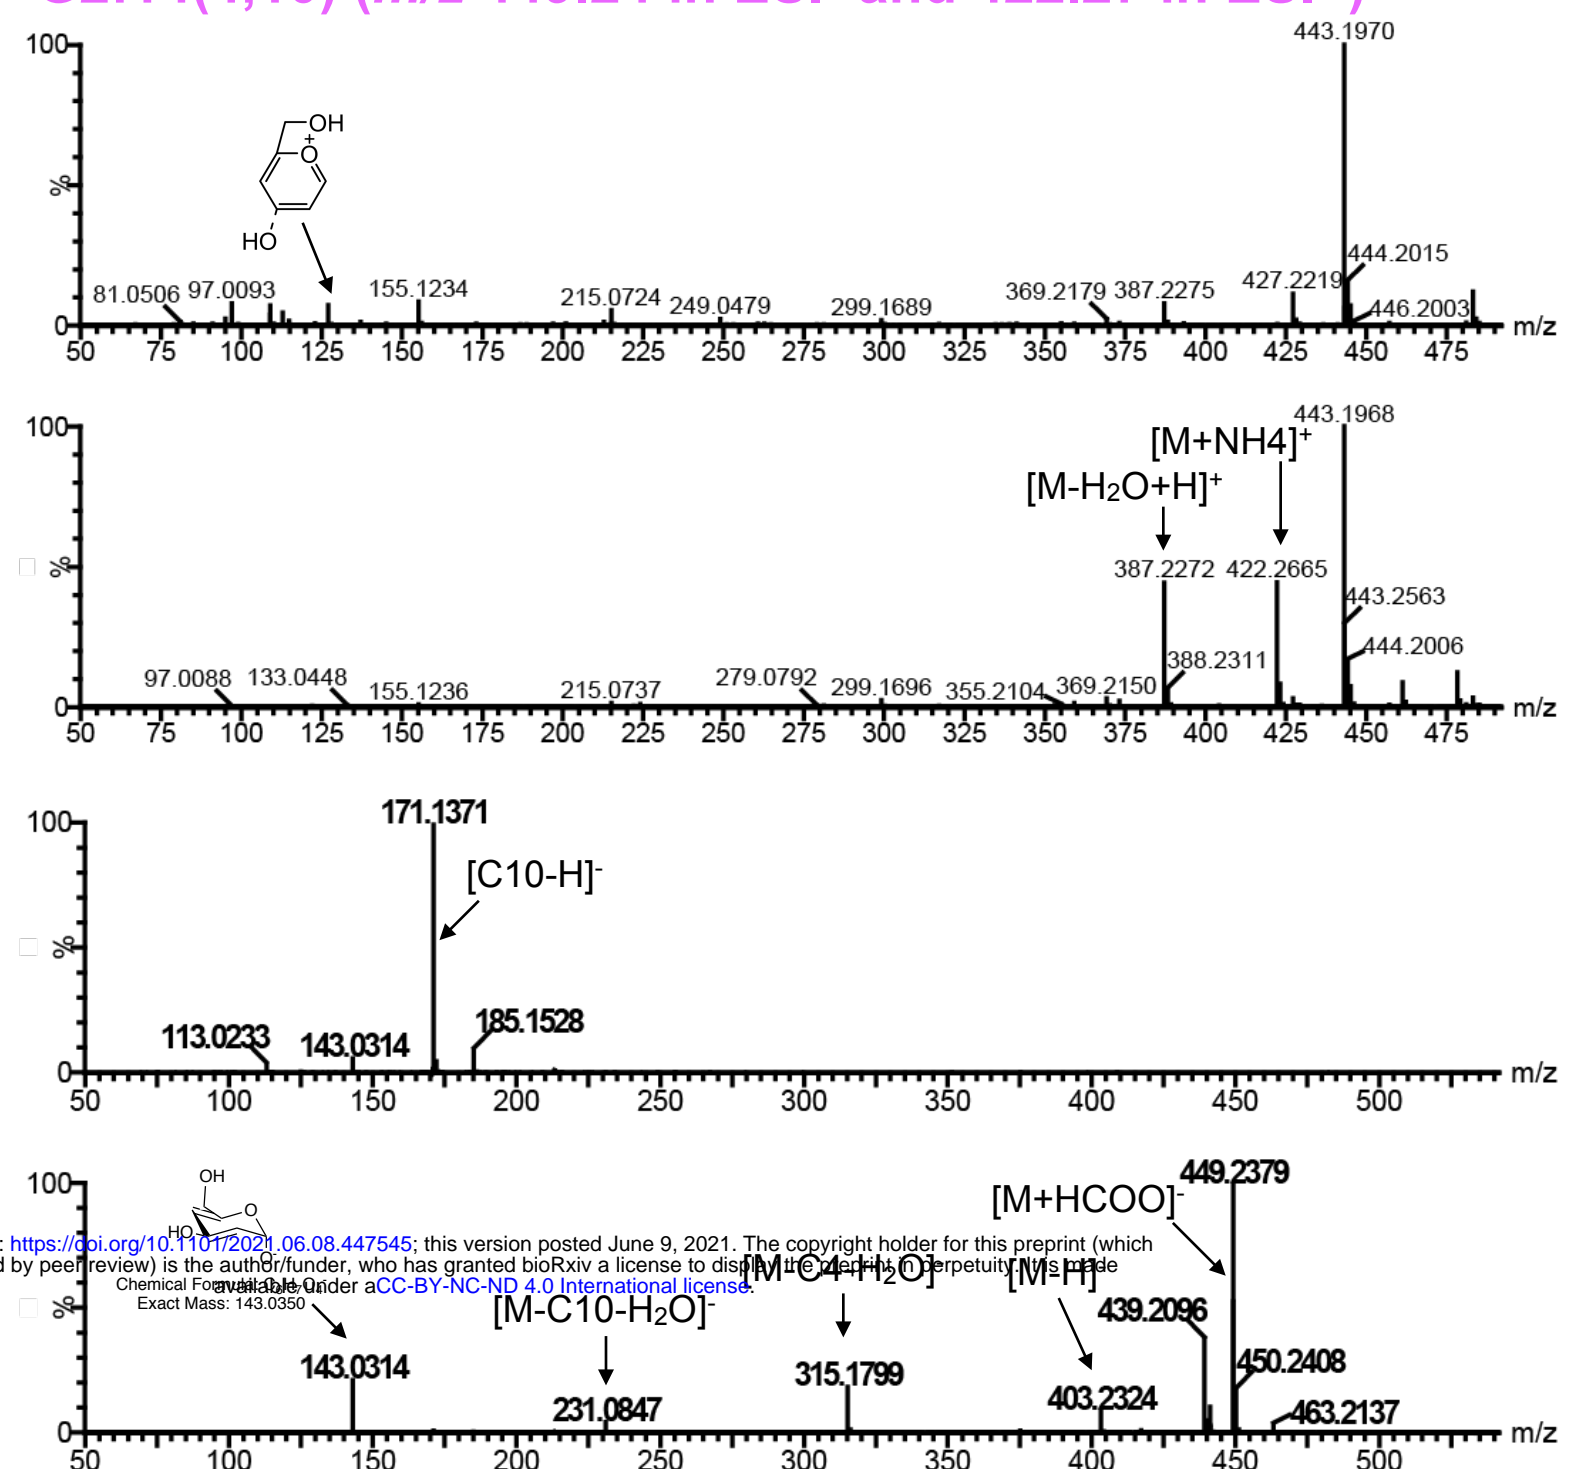

**G2:12(4,8) ( $m/z$  421.21 in ESI- and 394.24 in ESI+)**

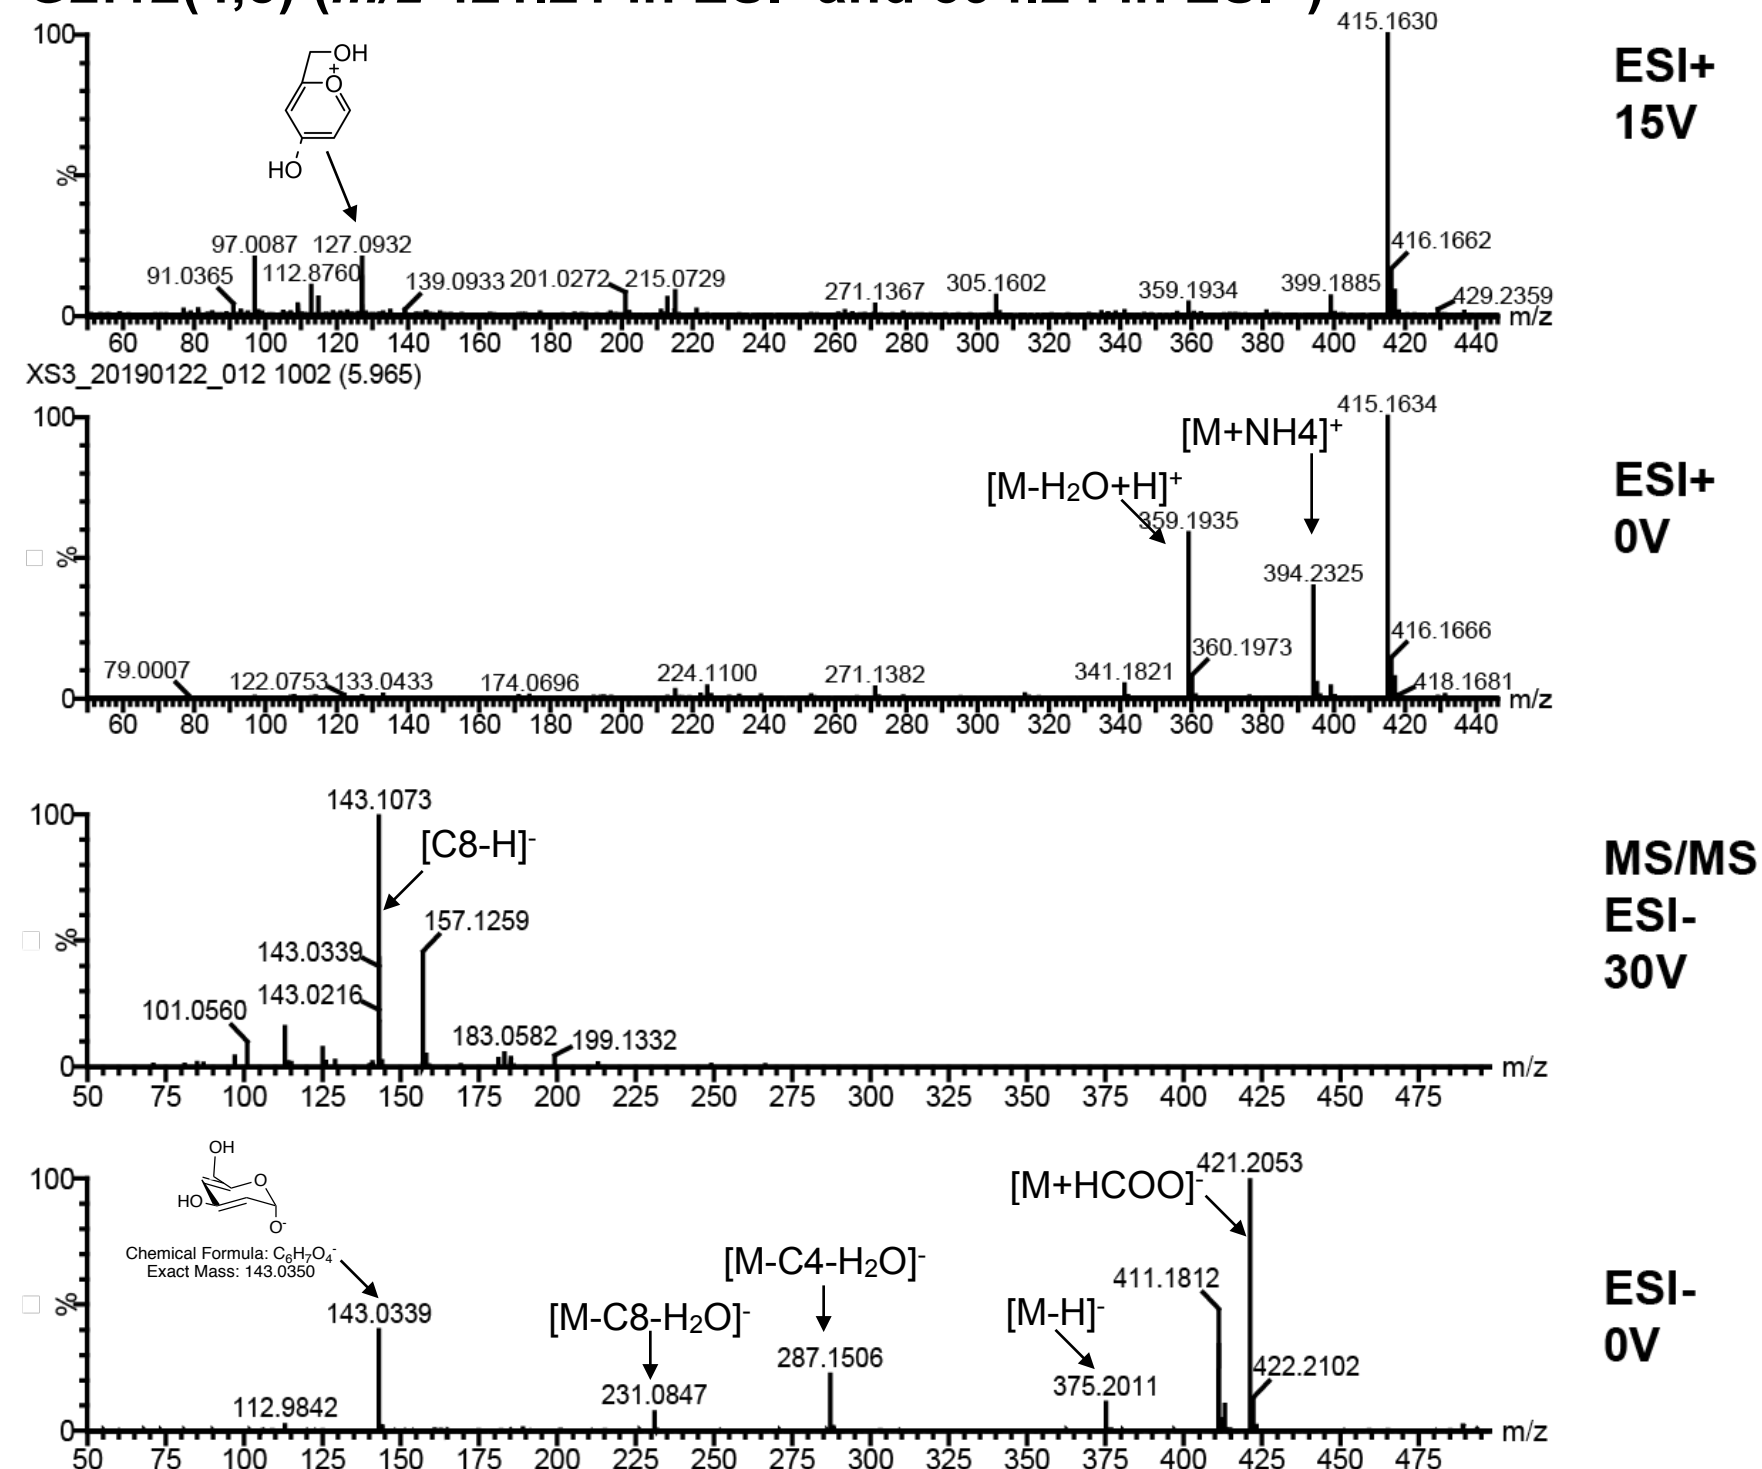

**(C) Metabolite a**  
**I3:16(4,4,8) ( $m/z$  491.25 in ESI- and 464.28 in ESI+)**

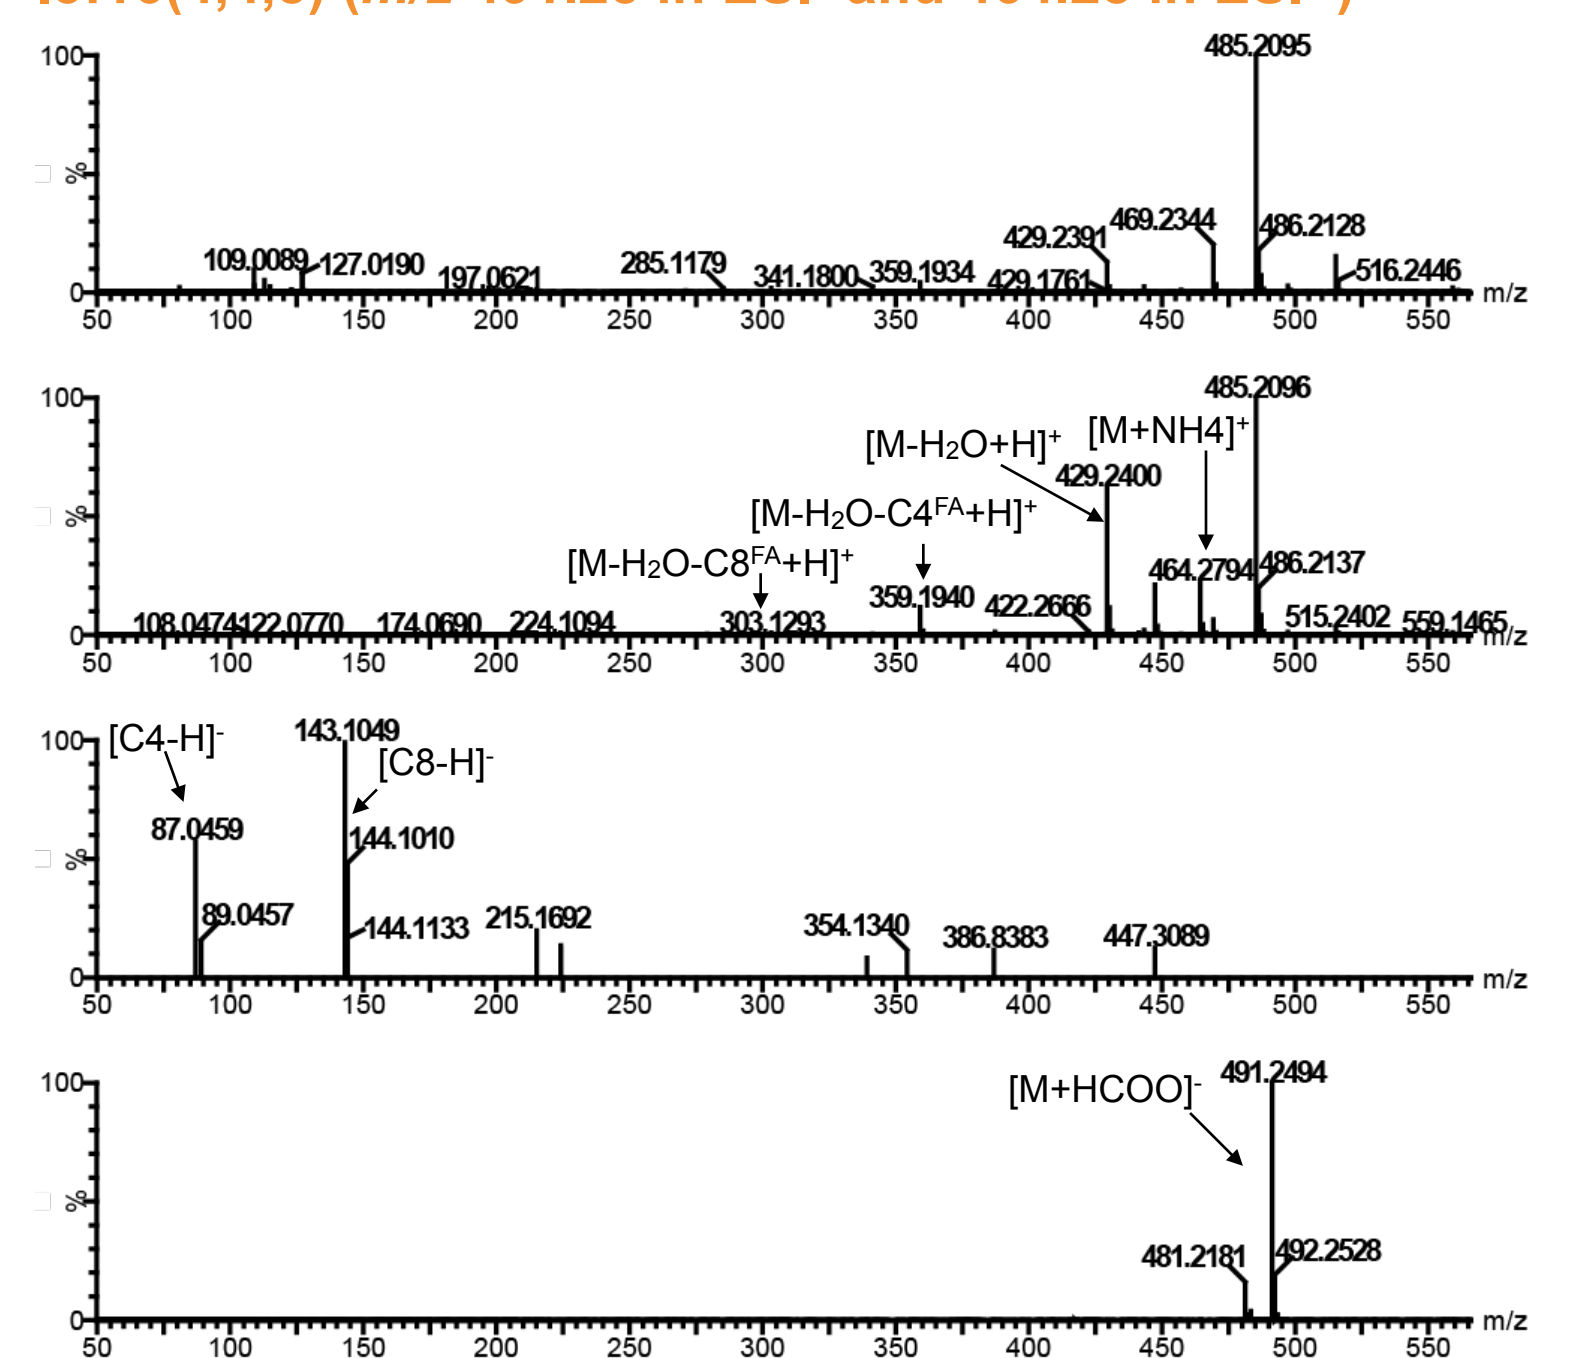

**Fig. S2. Mass spectra of abundant acylhexoses in *S. nigrum*.** *S. nigrum* di- and triacylglucoses and triacylinositols fragment in either negative or positive ion mode by losing the short and medium-length acyl chains as neutral fatty acids, which can also be seen in negative ion mode. These observations allow for determination of the number and length of acyl chains attached to each acylglucose. For more detail, see Supplementary Text. **(A)** Fragmentation of *S. nigrum* triacylglucoses G3:16 and G3:14. Fragmentation of G3:16 in 0V ESI- mode is characterized by the loss of C4, C10 and C2 ketenes. ESI- MS/MS spectrum (30V) generated from [M+formate]<sup>-</sup> of G3:16 reveals the presence of C4 (*m/z* 87.04) and C10 (*m/z* 171.14) fatty acids. Similarly, fragmentation of G3:14 in ESI- mode is characterized by the loss of C4, C8 and C2 ketenes under no collision energy (0V), while 30V ESI- MS/MS of product ions from [M+formate]<sup>-</sup> of G3:14 reveals the presence of C4 (*m/z* 87.04) and C8 (*m/z* 143.10) fatty acids. Fragmentation of both triacylglucoses in ESI+ mode (0 and 15V) results in the loss of a C4 fatty acid, followed by loss of a C10 or C8 fatty acid, respectively. **(B)** Fragmentation of *S. nigrum* diacylglucoses G2:14 and G2:12. Fragmentation of G2:14 in ESI- mode is characterized by the loss of C4 and C10 ketenes under no collision energy (0V). ESI- MS/MS spectra (30V) of product ions generated from [M+formate]<sup>-</sup> of G2:14 reveals the presence of C4 (*m/z* 87.04) and C10 (*m/z* 171.14). Similarly, fragmentation of G2:14 in ESI- mode is characterized by the loss of C4 and C8 ketenes under no collision energy (0V), while 30V ESI- MS/MS of product ions from [M+formate]<sup>-</sup> of G2:12 reveals the presence of C4 (*m/z* 87.04) and C8 (*m/z* 143.10). ESI+ mode (15V) of both diacylglucoses reveal the loss of C4 and a C10 or C8, respectively, while 0V ESI+ results in little fragmentation. **(C)** Fragmentation of I3:16 from *S. nigrum*. Fragmentation of I3:16 in ESI+ mode is characterized by the loss of C4 and C10 fatty acids under no collision energy (0V). ESI- MS/MS spectra (30V) of product ions generated from [M+formate]<sup>-</sup> of I3:16 reveals the presence of C4 (*m/z* 87.04) and C8 (*m/z* 143.10). In contrast to acylglucoses, 0V ESI- result in little fragmentation for acylinositols.



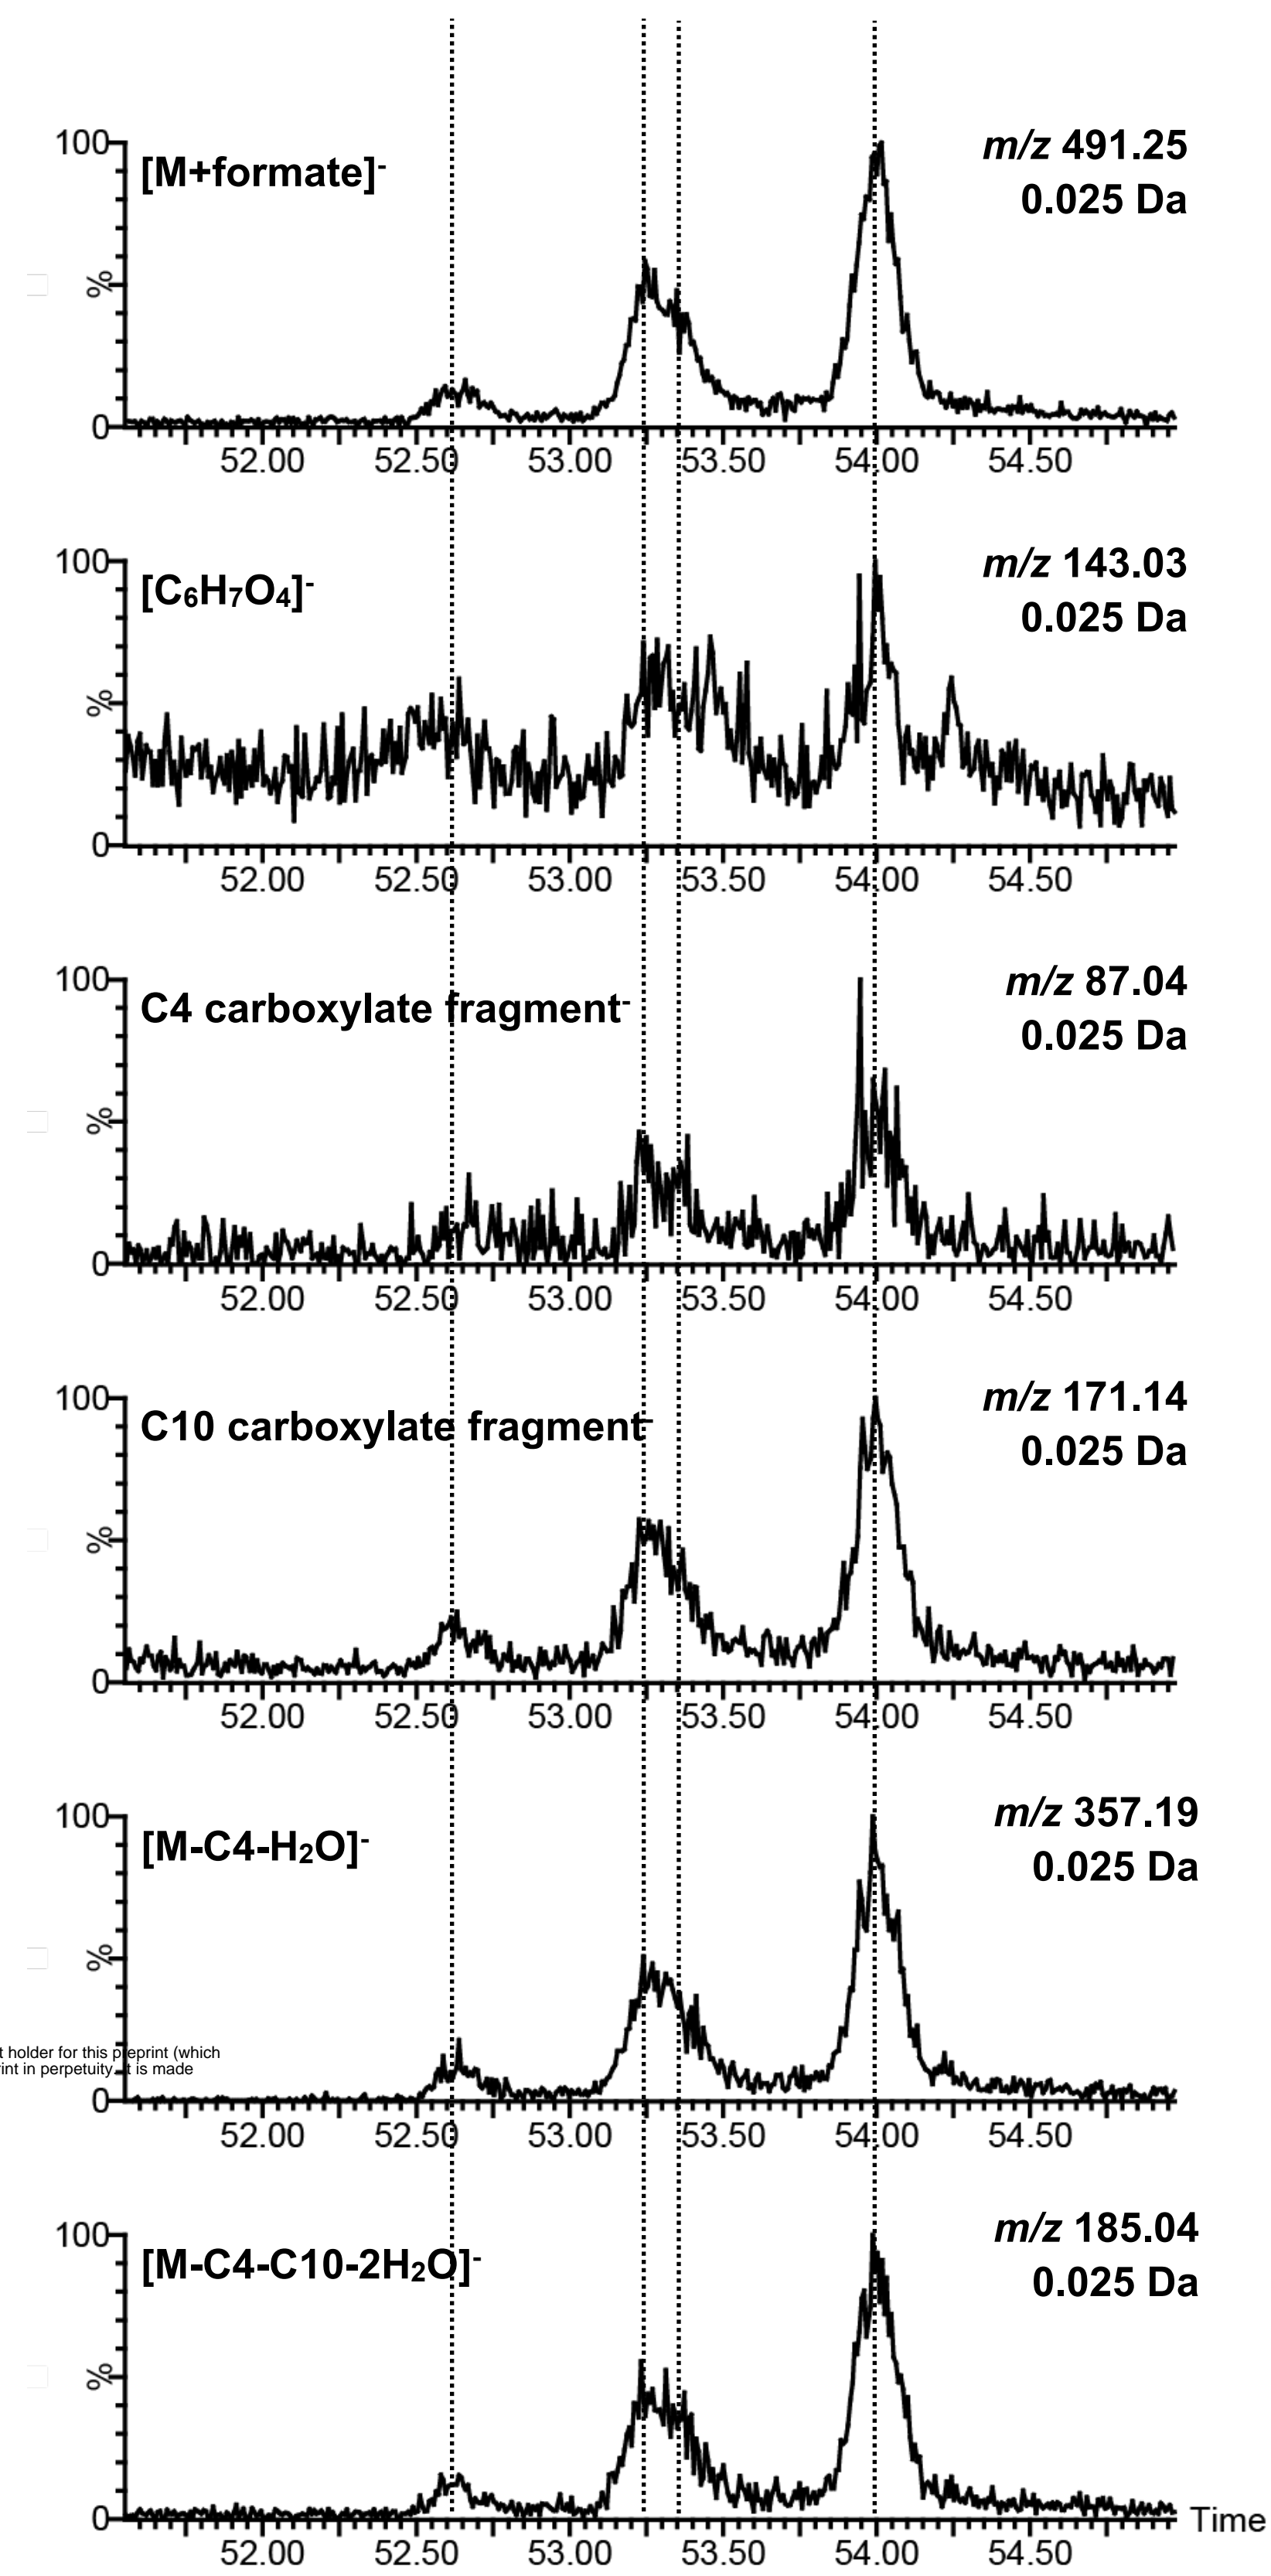

bioRxiv preprint doi: <https://doi.org/10.1101/2021.06.08.447545>; this version posted June 9, 2021. The copyright holder for this preprint (which was not certified by peer review) is the author/funder, who has granted bioRxiv a license to display the preprint in perpetuity. It is made available under aCC-BY-NC-ND 4.0 International license.

**Fig. S3. Co-chromatography of metabolite c and characteristic fragment ions under different collision-induced dissociations (CID).** Extracted ion chromatograms (EICs) of (from top to bottom)  $[M+\text{formate}]^-$  of metabolite c ( $m/z$  491.25) in 0V ESI-, glucose core structure  $[\text{C}_6\text{H}_7\text{O}_4]^-$  ( $m/z$  143.03) in 0V ESI-, C4 ( $m/z$  87.04) and C10 ( $m/z$  171.14) carboxylate fragment under CID potential 30V, and  $[M-\text{C4}-\text{H}_2\text{O}]^-$  ( $m/z$  357.19) and  $[M-\text{C4}-\text{C10}-\text{H}_2\text{O}]^-$  ( $m/z$  185.04) fragment ions under CID potential 15V. For more details, see Supplementary Text.

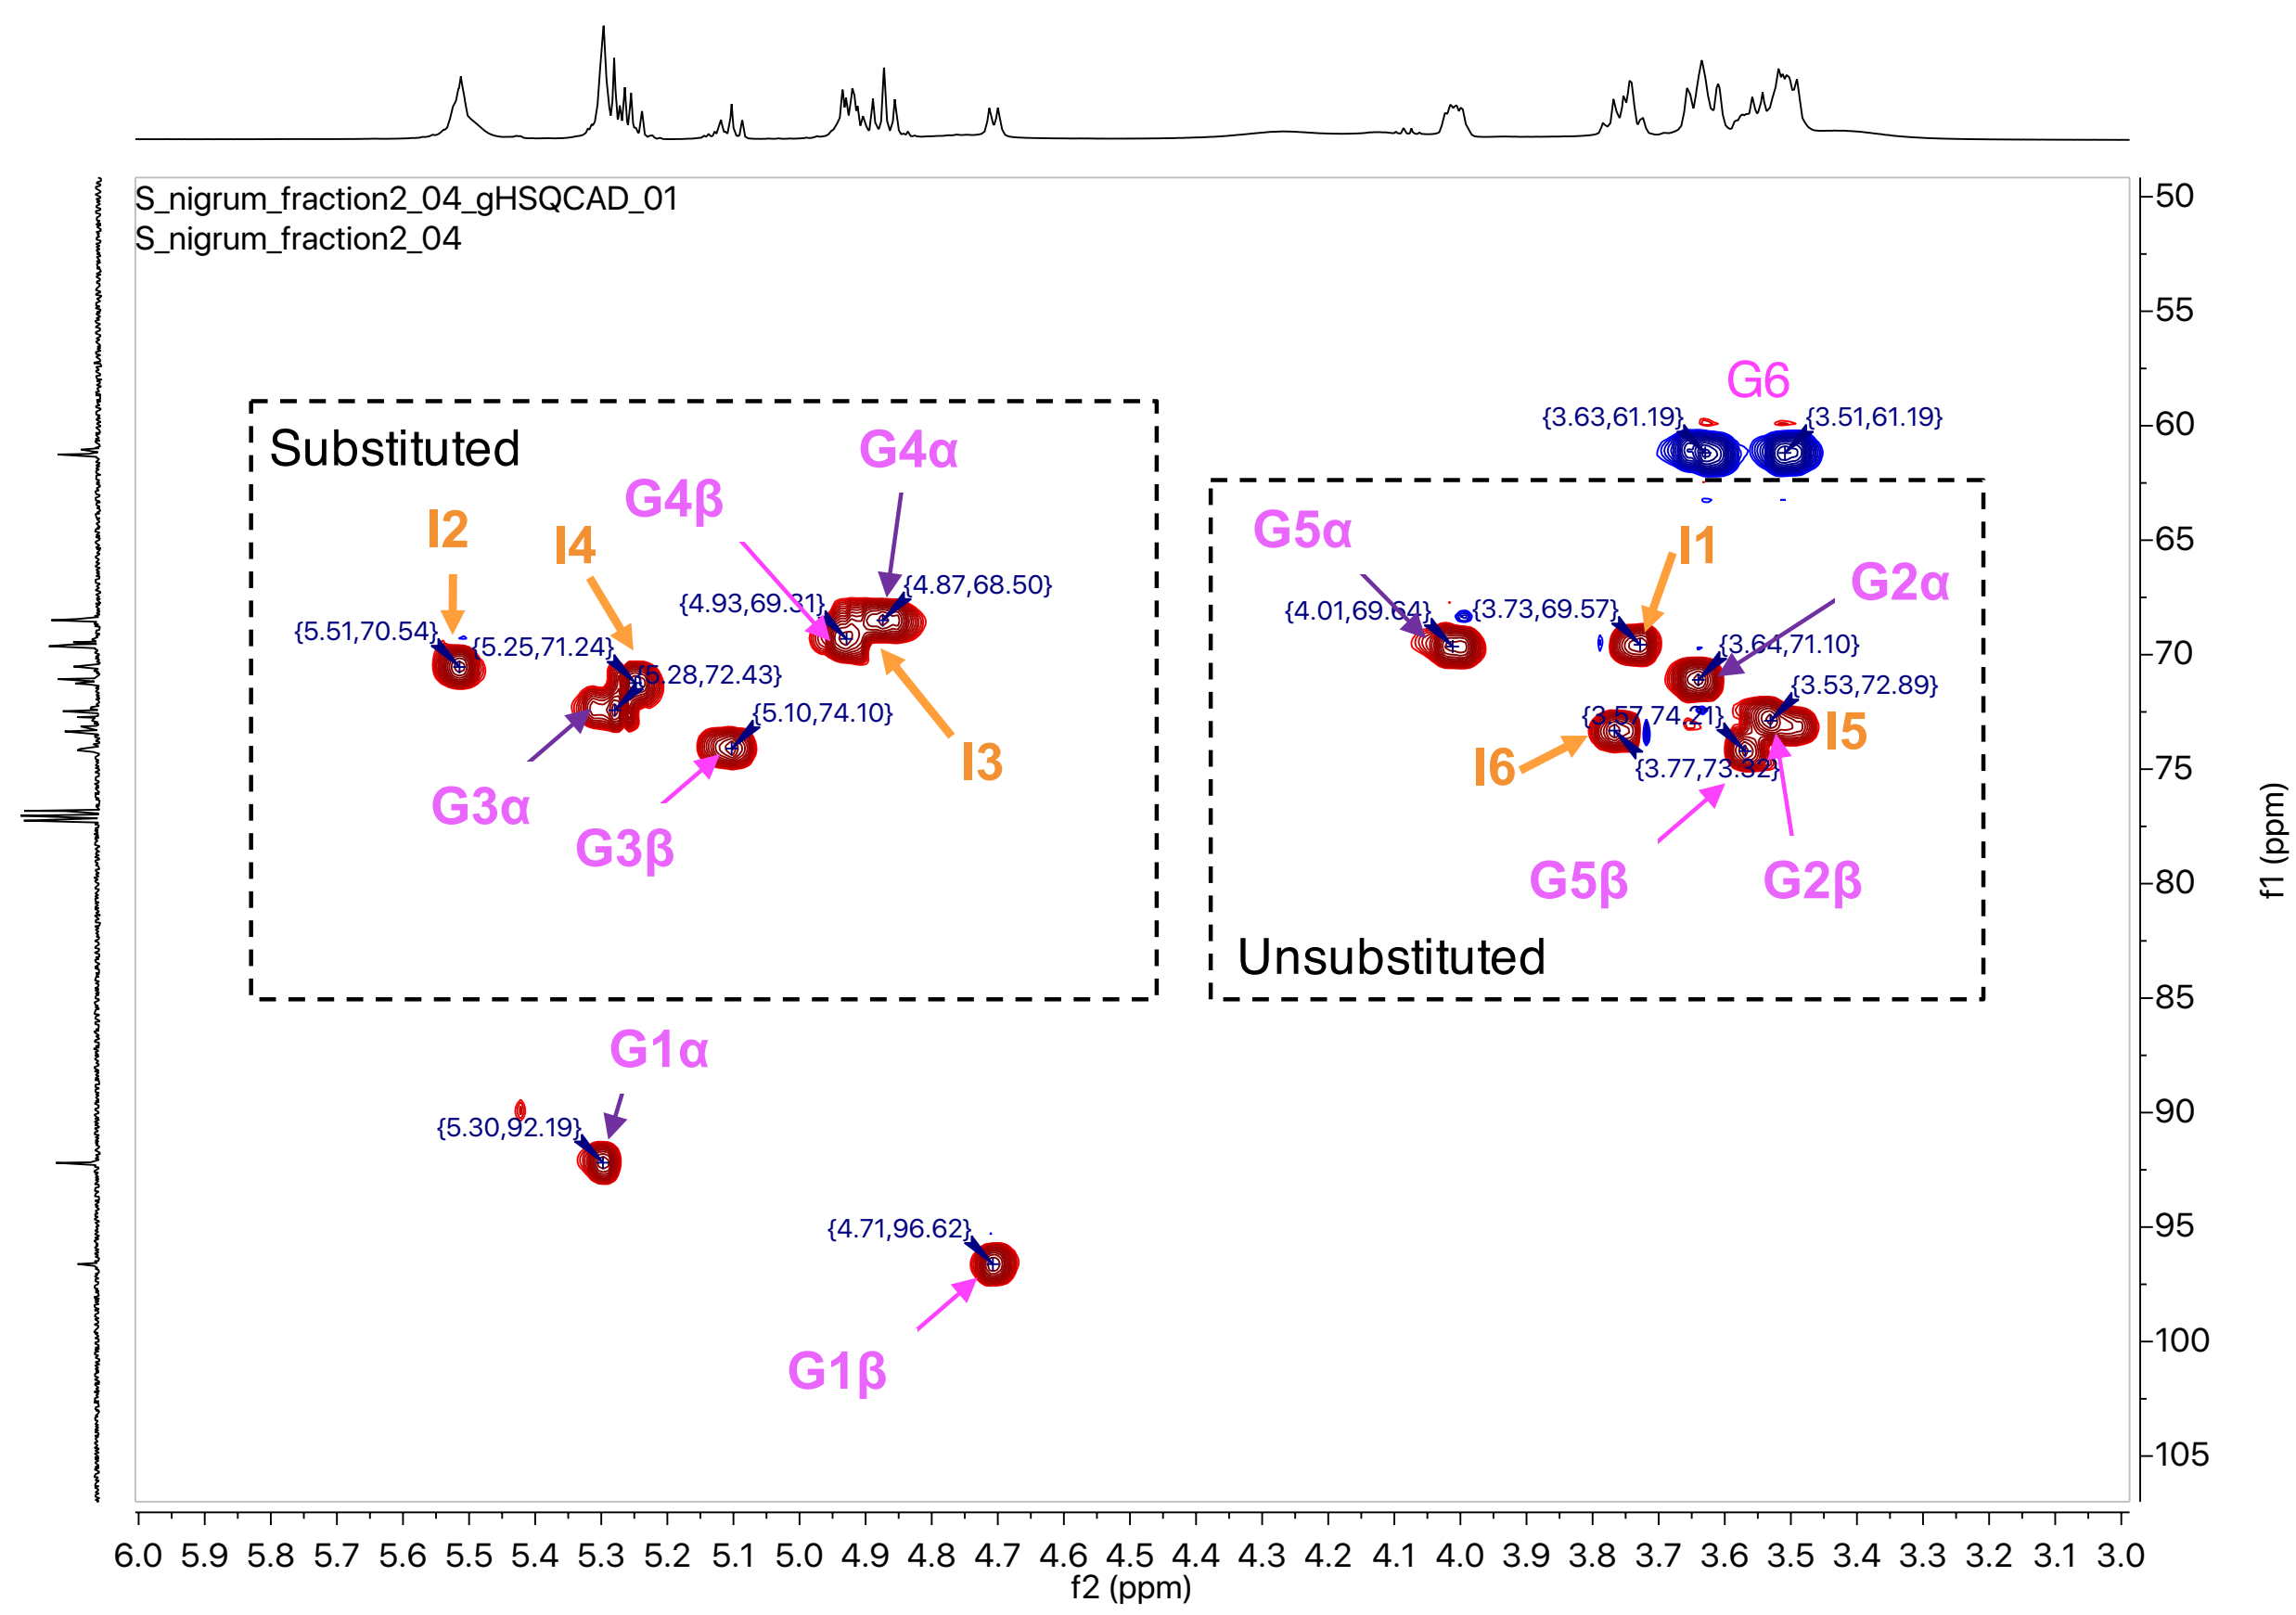

Supplemental Figure 4

**Fig. S4. HSQC spectrum reveals two type of acylsugars in the more-polar fraction of *S. nigrum* leaf surface extract.** HSQC spectrum of fraction 2 shows signals from diacylglucoses (magenta) and triacylinositols (orange) that were confirmed after HSQC-TOCSY separating correlation signals.

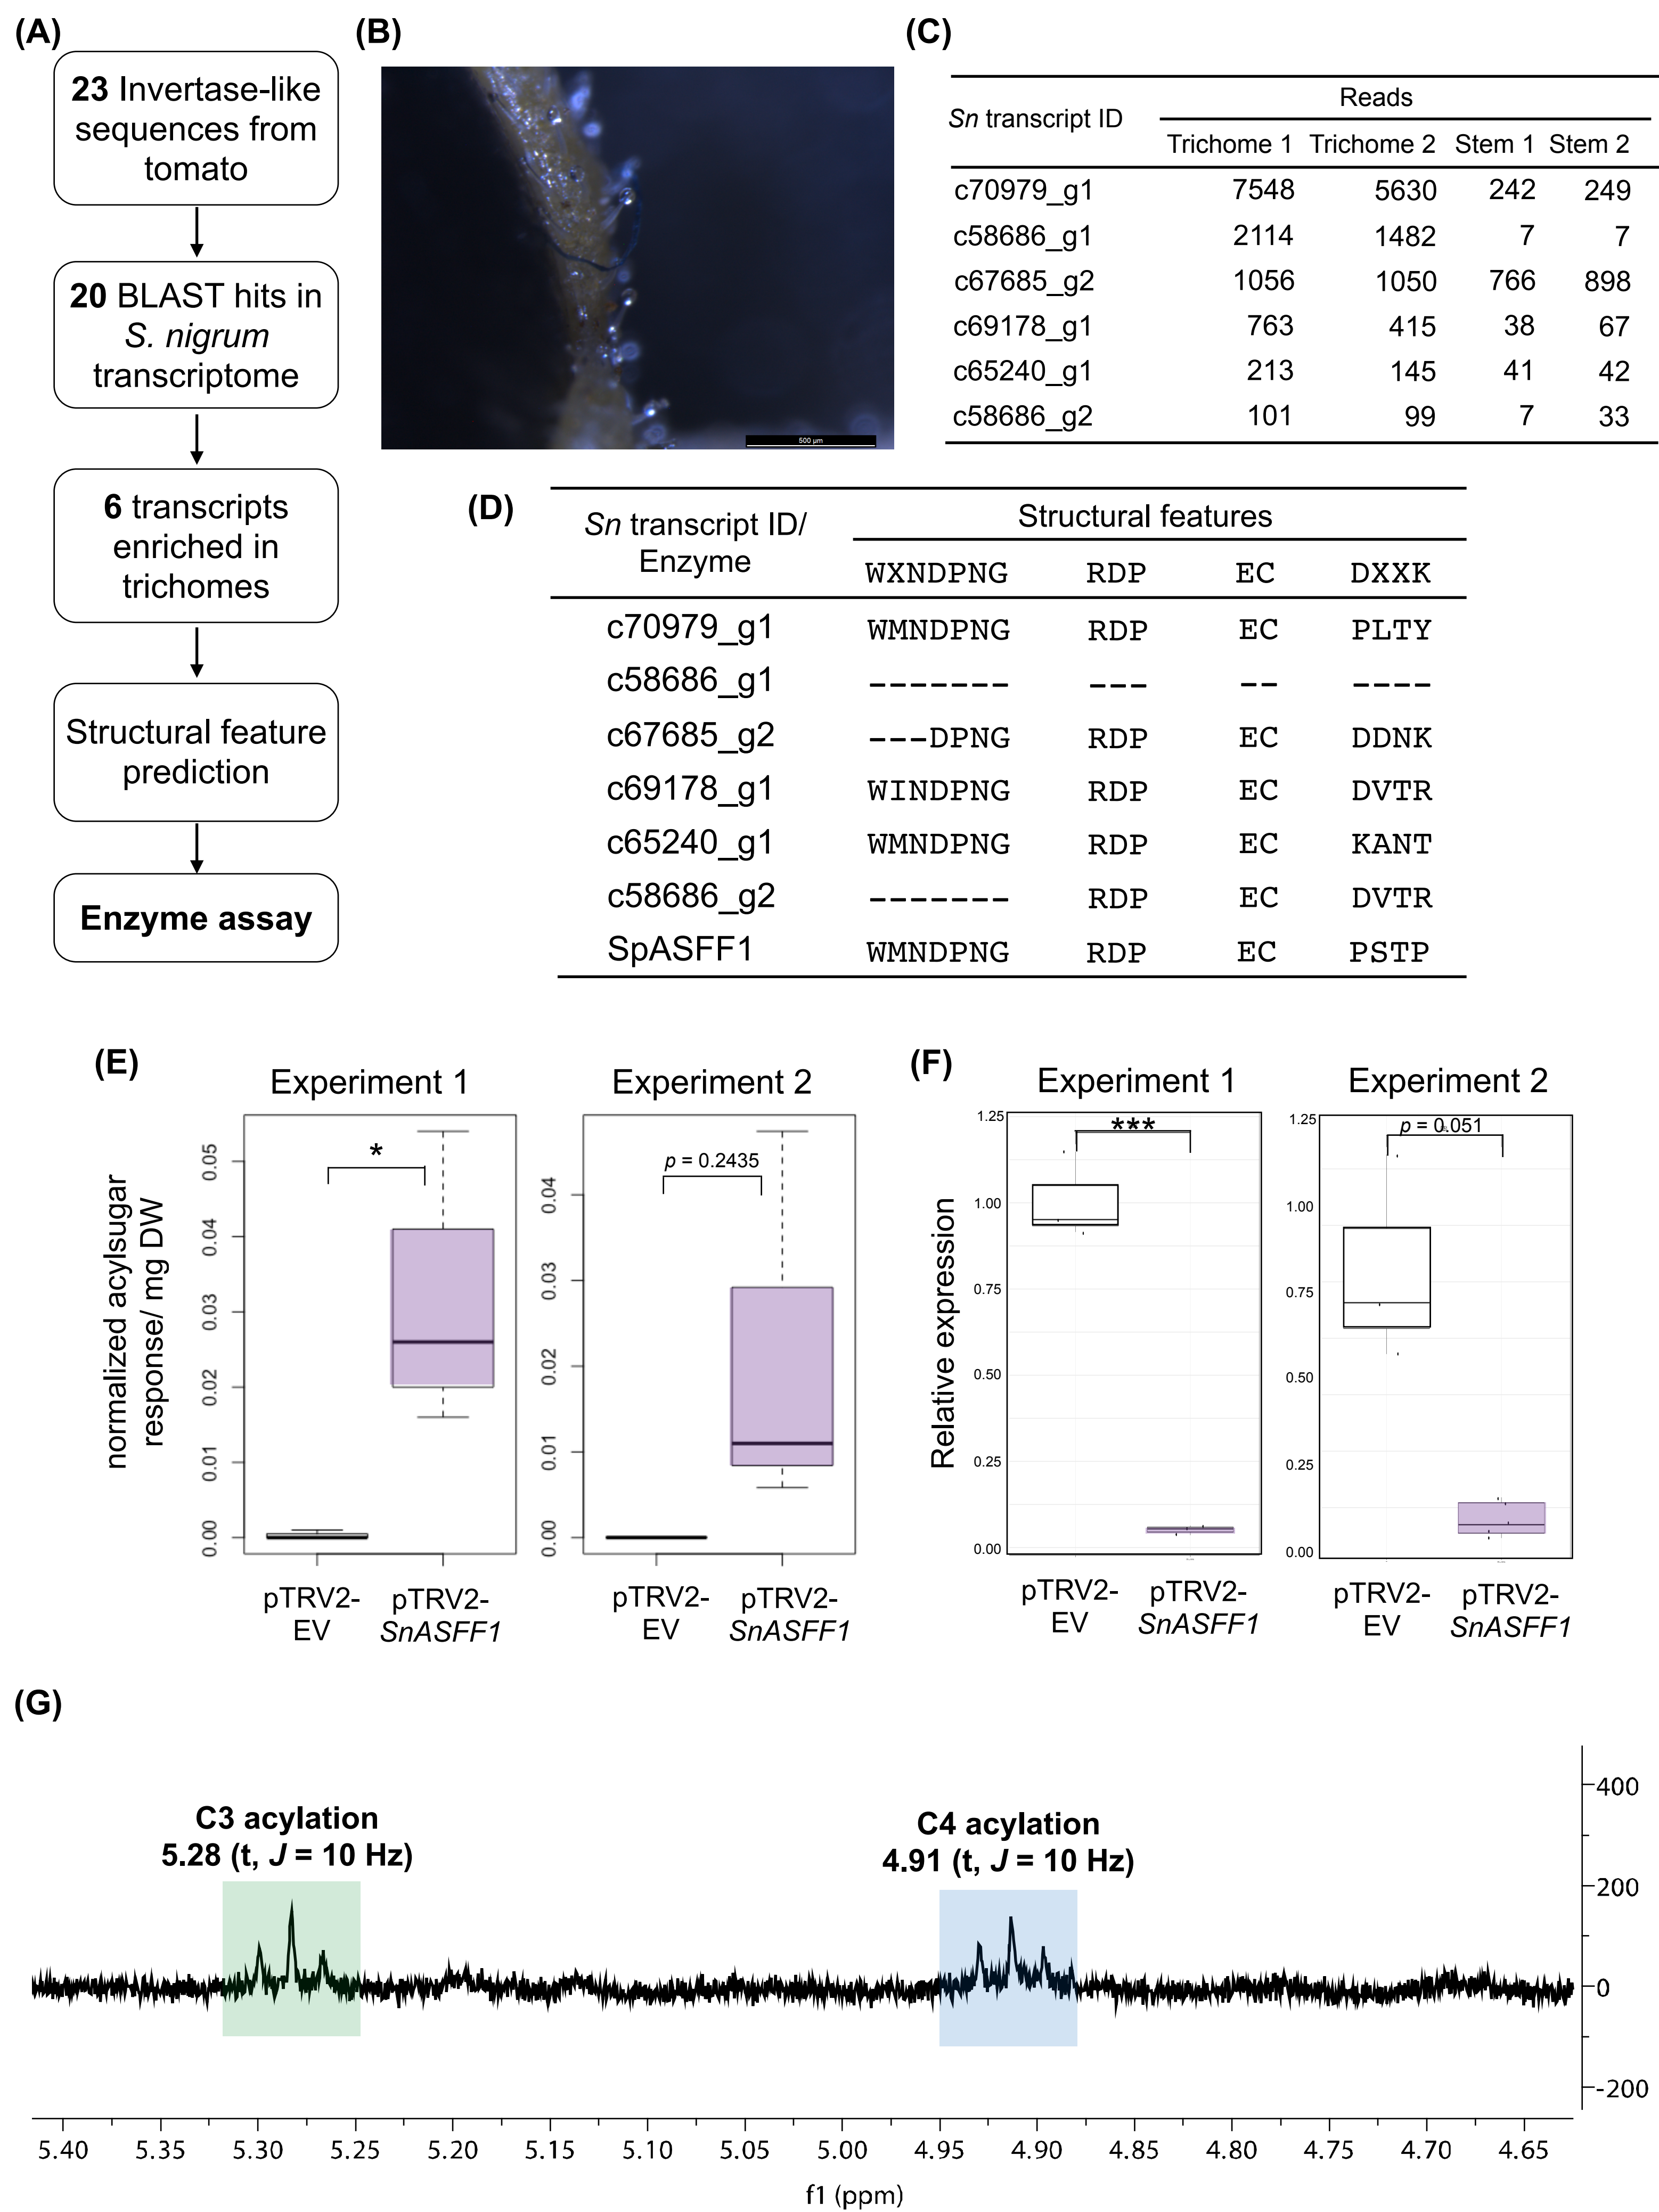



**Fig. S5. Identification of a trichome-expressed ASFF candidate involved in *S. nigrum* acylglucose biosynthesis.** (A) Flow chart of identifying ASFF candidate transcripts in *S. nigrum* transcriptome. (B) Close-up photo of a *S. nigrum* peduncle with acylsugar droplets accumulating on trichome tips. Excessive acylsugars produced on the peduncle appear to drip down and coat the trichome-free fruit. (C) Six invertase-like candidate transcripts are enriched in *S. nigrum* trichome RNA-Seq data from Moghe et al. (2017) (D) Structural features identified a transcript, *c70979\_g1* (*SnASFF1*), with conserved catalytic sites and a non-canonical substrate binding site, as seen on SpASFF1. (E) Comparison of S2:14(4,10) accumulation in *SnASFF1*-targeted and empty vector VIGS plants from two independent experiments. Acylsugars were analyzed using LC-MS in ESI- mode. Peak areas of S2:14(4,10) ( $m/z$  611.29) were integrated under negative mode and normalized to the internal standard telmisartan and dry leaf weights. See Table S5 for details. (F) qPCR analysis of *SnASFF1* transcript abundance in VIGS plants from two independent experiments. Relative transcript abundance was generated using the  $\Delta\Delta C_t$  method (53) and normalized to the geometric mean of two actin gene transcript levels. Significant levels are shown (\*,  $p < 0.05$ ; \*\*,  $p < 0.01$ ; \*\*\*,  $p < 0.001$ ; Welch's two sample t-test). (G)  $^1\text{H}$  NMR of S2:14(4,10) purified from *SnASFF1*-targeted VIGS plants. Two triplet peaks at 5.28 (green box) and 4.91 ppm (blue box) indicate the 3- and 4-positions on sucrose, respectively, are acylated.

(A)

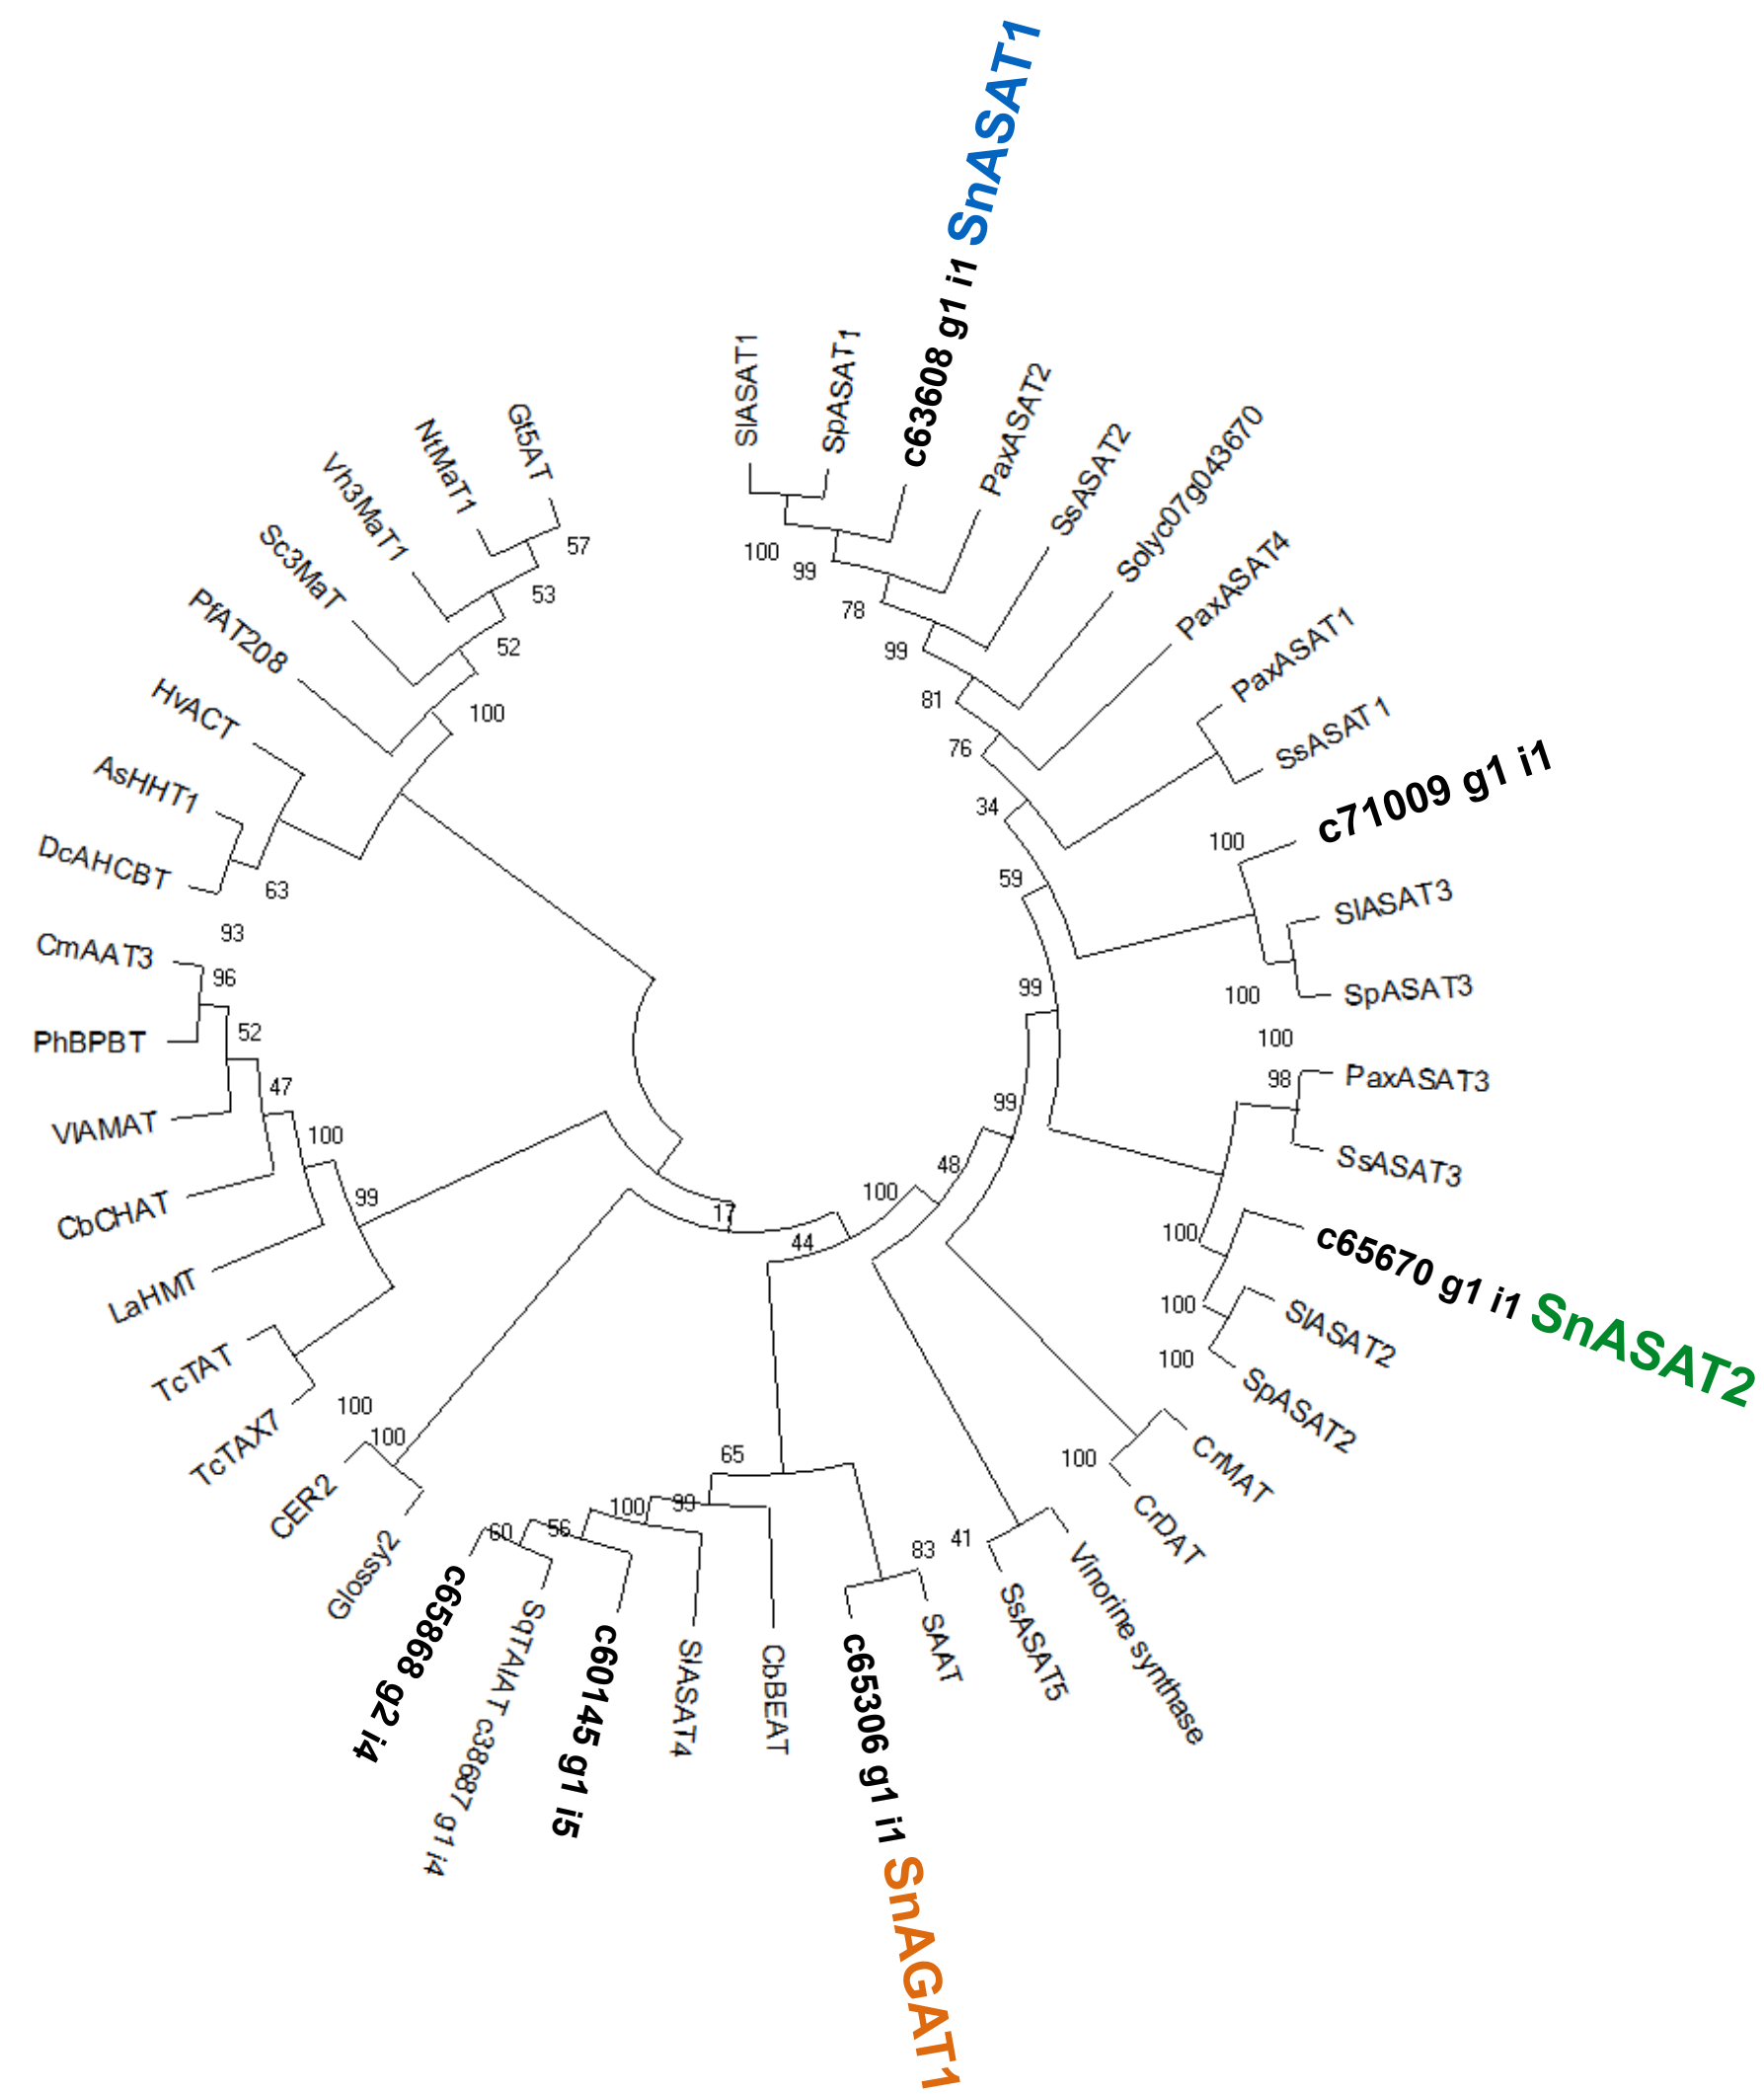

(B)

| Sn transcript ID | Homolog | sequence length | Number of Reads |            |        |        |
|------------------|---------|-----------------|-----------------|------------|--------|--------|
|                  |         |                 | Trichome 1      | Trichome 2 | Stem 1 | Stem 2 |
| <i>c63608 g1</i> | SIASAT1 | 430             | 2750            | 2014       | 3      | 19     |
| <i>c65670 g1</i> | SIASAT2 | 442             | 1574            | 1257       | 3      | 30     |
| <i>c71009 g1</i> | SIASAT3 | 430             | 1993            | 1636       | 32     | 89     |
| <i>c60145 g1</i> | SIASAT4 | 438             | 4904            | 3625       | 20     | 40     |
| <i>c53868 g2</i> | SIASAT4 | 435             | 4928            | 3997       | 27     | 54     |
| <i>c65306 g1</i> | SsASAT5 | 451             | 3765            | 3050       | 16     | 46     |

**Fig. S6. Six ASAT homologs are preferentially expressed in *S. nigrum* trichomes. (A)** Phylogenetic analysis of ASAT candidates and previously characterized BAHDs. The phylogenetic tree shows several previously characterized ASATs and other BAHD acyltransferases. BAHD candidates in *S. nigrum* are marked in bold, whereas characterized SnASATs are marked with respective colors (SnASAT1 in blue, SnASAT2 in green and SnAGAT1 in orange). **(B)** Sequence length and RNA-Seq data for homologs of characterized ASATs in *S. nigrum*. RNA-Seq data are derived from Moghe et al. (2017).

|                |              | 1                                                            | 10                                          | 20          | 30 | 40 | 50 | 60 |
|----------------|--------------|--------------------------------------------------------------|---------------------------------------------|-------------|----|----|----|----|
| <b>SnASAT1</b> | c63608_g1_i1 |                                                              |                                             |             |    |    |    |    |
| <b>SnASAT2</b> | c65670_g1_i1 | MSASKQLVLLSKKLIKPSPTPLSHRIHNL                                | SLMDQMGTHSYMAAMLFYPKQDTTSMPEP               |             |    |    |    |    |
|                | c71009_g1_i2 | MSVSRLVSSVCKKIKPYSPTPI                                       | SHRCHKLSYLDQMIGGVYLPFAFFYPKLSNTWSNKPS       |             |    |    |    |    |
|                | c53868_g2_i2 | MAAS---TILSKMKIKLFSPTPPSLRRYNLSFMD                           | CINLPQYMPLAFFYKPKENCN----                   | K           |    |    |    |    |
|                | c60145_g1_i5 | -MANLEIQIESRKLKPSIPTPNHLRTLKLSLFDQLAPLAYVPLLFHYLPSSTEETI---  |                                             |             |    |    |    |    |
| <b>SnAGAT1</b> | c65306_g1_i1 | ----MEIIILSKEIVKPTPTPPHLRNHKL                                | CIFDQIALEICITPIFFYKNNNNIVD----              |             |    |    |    |    |
| <b>SnASAT1</b> | c63608_g1_i1 | TKISQILEKSLSKVLTSYYPFAGHVK-DN-SFVECNDMGADLSQVRID-CPMSSIFDHRP |                                             |             |    |    |    |    |
| <b>SnASAT2</b> | c65670_g1_i1 | NIISDHLEKSLSKVLTNYYPLAGKLN-GN-ISVDCNDNGVEFFVTKID-CPMSEILNDPY |                                             |             |    |    |    |    |
|                | c71009_g1_i2 | IQISQILENSLSKVLSSYYPFAGQIK-DNNTYVDCNDTGAEYLNQIN-RSMSEILNHPY  |                                             |             |    |    |    |    |
|                | c53868_g2_i2 | TERCDKIQKSLALTLTKFYPLAGRFB-EDEFSIHNDGVEYIETKVLNADLAEFLRQGT   |                                             |             |    |    |    |    |
|                | c60145_g1_i5 | ---CDKLQKSLAETLTKFYPLVGRFS-EDEFSIHNDQGVYVETKVLNADLAEFLHHLG   |                                             |             |    |    |    |    |
| <b>SnAGAT1</b> | c65306_g1_i1 | ----NRLKSSLAETLTLFYPLAGELSS                                  | EDSTFVDCNDNGVLYVEACVKDVCMD                  | DEFLRN-I    |    |    |    |    |
| <b>SnASAT1</b> | c63608_g1_i1 | TDIDDLVLP--IDPWFPTD-----SLVATQLCHFECGGIALGACLS               | HKVSDGYSMGN                                 |             |    |    |    |    |
| <b>SnASAT2</b> | c65670_g1_i1 | SDKDNLAYPKGVPSAYSIEG-----SLAVFQLSHFNCGGIAVSICLS              | HKIGDGYTVGN                                 |             |    |    |    |    |
|                | c71009_g1_i2 | NDVVDVVPQDLPWSSTLNR-----SPLVVQLSHFDCGGIAMSACMS               | HKIVDGYFSK                                  |             |    |    |    |    |
|                | c53868_g2_i2 | NNIELLNDLIPIG--MQSCP-----LLRIQVNI                            | FNCGGLVMGIQMSHILADGFTLAT                    |             |    |    |    |    |
|                | c60145_g1_i5 | PKNEPLVDLLPKMDHQSSP-----LLGVKVN                              | VFNCGGVVIGIHMSHIVADALTLAT                   |             |    |    |    |    |
| <b>SnAGAT1</b> | c65306_g1_i1 | DDLSQLINFLPQNASMCSKMNYVQ                                     | TLETLSVIQVTRFDCGGVAIGGVLF                   | HRLLDGDTMSK |    |    |    |    |
| <b>SnASAT1</b> | c63608_g1_i1 | FLKDWAMVARDTEAKP----SPLFN--GASIFKPSNSS-SFQVVND----PPLNKNVSKR |                                             |             |    |    |    |    |
| <b>SnASAT2</b> | c65670_g1_i1 | FMNHWATIARNPMSLETYPISP                                       | KFD--GAYFFPPAQDD-DLSNVSNNNIVPEREECVARN      |             |    |    |    |    |
|                | c71009_g1_i2 | FINDWAATARNMDFKP----SPQFN--ASTLFLTHDPPSFTPINVP---PLSQLRVSRM  |                                             |             |    |    |    |    |
|                | c53868_g2_i2 | FVKEWTRISQGT--TKD-CLPSFGHLPS--LFP                            | SRVVSQPYIS-PPSHN-RDTKIVTRR                  |             |    |    |    |    |
|                | c60145_g1_i5 | FVDEWAHICKIGTTITKDSYLP                                       | SFGHLSS--LFPTRVLSGTQFP-LPSPNTTGPKVVTRR      |             |    |    |    |    |
| <b>SnAGAT1</b> | c65306_g1_i1 | FFNTWAKIARGDNHNDGVEKITPLDLTSSSLLFPAQNF                       | PQEFMETKKRMFFYEKPLVRR                       |             |    |    |    |    |
| <b>SnASAT1</b> | c63608_g1_i1 | YHFSASKLKTLS-LINSADSGSQIRPTTVETITAF                          | LSKCVNTP-----TFTPPLL                        |             |    |    |    |    |
| <b>SnASAT2</b> | c65670_g1_i1 | FSFTSSNLSALKARVINQSEVQN---PTDTEIVSAFIYQRAMATKKVMTSSGYSIRPSIL |                                             |             |    |    |    |    |
|                | c71009_g1_i2 | YNFSSSLARLKNI IATNSQVQN---PTRVEVATSLLHKCCTAASMEKSG---LFKPSLL |                                             |             |    |    |    |    |
|                | c53868_g2_i2 | FIFDALAI AKLKERI INSSGMLITR-PTRVVVMSLLWKVLMGISTAKHG--HSRD    | SHLI                                        |             |    |    |    |    |
|                | c60145_g1_i5 | FVFDPAIANLKNNTLLDS-TDSRR-PTRVVIVMSLIWKVLARISSAKHG--HSRDSSFL  |                                             |             |    |    |    |    |
| <b>SnAGAT1</b> | c65306_g1_i1 | FVFNKAIEDIKMKVSEN---VPN-PSRVEAL                              | TTFIWKHMILATRATKG--ISSRPTML                 |             |    |    |    |    |
| <b>SnASAT1</b> | c63608_g1_i1 | VQAVNLRGTSNDALVPADLAGNSILPFVSAANKEEMNLQRLVGELRKGKEKIQDMLKYI  |                                             |             |    |    |    |    |
| <b>SnASAT2</b> | c65670_g1_i1 | HHAVNLHPP-----LPKNTMGNNFFSLLTKEEKEIDLPQVVSKLRKAKEELRKKYKNA   |                                             |             |    |    |    |    |
|                | c71009_g1_i2 | SHVMNLRPP-----IPLNTIGNATCLYSSIAMTEDIKLSNYVAQLRKAKQKLRDELKDL  |                                             |             |    |    |    |    |
|                | c53868_g2_i2 | FPVNLRGKSILPYVEHALGNFCLAGTATLEAS-QSRKELTEYVNMVGS             | TARDTSATIGKA                                |             |    |    |    |    |
|                | c60145_g1_i5 | FSINLRGKSNIP---HALGNCIMFGIAADLEA-SPKQELNYFVNLRNTIRETNL       | GIGKA                                       |             |    |    |    |    |
| <b>SnAGAT1</b> | c65306_g1_i1 | AHVVNLRSRIDPKLPNAFGNLAFAKSEVIEMSDHELELPHLLGIVREMLENMSEN      | LKA                                         |             |    |    |    |    |
| <b>SnASAT1</b> | c63608_g1_i1 | ESEELLCSEIAREMNERTSNND-VSIYRFTSLRRFPVND-MNFGWGRPRKVD---VA    |                                             |             |    |    |    |    |
| <b>SnASAT2</b> | c65670_g1_i1 | KIEELLP-ITLEQYREANEMFSNNSCFDLYRFSSIIKFPFYD-VDFGWGKPEKVT---LA |                                             |             |    |    |    |    |
|                | c71009_g1_i2 | DINQIVP-YALGKMKEVIDMI-EKDIFDIYVCTSLCNVGLYDKTNFGWGRPIRVT---HT |                                             |             |    |    |    |    |
|                | c53868_g2_i2 | S-VNDITSMFATYGTQVINKLGLGNEIDIYLITSWCRFPWYE-ADFGWGKPFWVS----P |                                             |             |    |    |    |    |
|                | c60145_g1_i5 | ESVDDISSLVVNNHIKAIKDFVQGDKMDVYPSTSWCGFTWYE-ADFGWGKPFWVS----S |                                             |             |    |    |    |    |
| <b>SnAGAT1</b> | c65306_g1_i1 | LEGDDALDSIVYMAIQLGILFP---QLDYNFSSWCNFGLYD-VDFGWGKPIFIAPFIEP  |                                             |             |    |    |    |    |
| <b>SnASAT1</b> | c63608_g1_i1 | T-YPIN-MFVLMNDQNADGLEVI                                      | VNLEEGEMSSFERNDELQFASPCSGL----              |             |    |    |    |    |
| <b>SnASAT2</b> | c65670_g1_i1 | SDSPIKNMFI                                                   | LMDNKNRNGVEAISGMKEQDMLALERDEEFLQFASPSS----- |             |    |    |    |    |
|                | c71009_g1_i2 | G-YRMNKSIVFFDDRSGDGIDLLITLPKDEMTIFQNNKOLLEFASPIVQSIK--       |                                             |             |    |    |    |    |
|                | c53868_g2_i2 | ISYYAIEGTL                                                   | LMETKDGDIAMVCLNENDMAEFERDPNLSSTSKV-----     |             |    |    |    |    |
|                | c60145_g1_i5 | VSIGDFESIVLIDTKNGDGI                                         | EARIGLKENDMTEFERDPHILSSTSKVAFDSQI-          |             |    |    |    |    |
| <b>SnAGAT1</b> | c65306_g1_i1 | ISSLNMHQIILVENGRNDGIEAWILRSNEEMIELEKDEEFLAYASPNPSVQYDP       |                                             |             |    |    |    |    |

Supplemental Figure 7

**Fig. S7. Multiple sequence alignment of candidate sequences.** BAHD characteristic HXXXD motifs (yellow) and DFGWG-like motif (green) are highlighted. Hyphens indicate gaps in protein sequence.



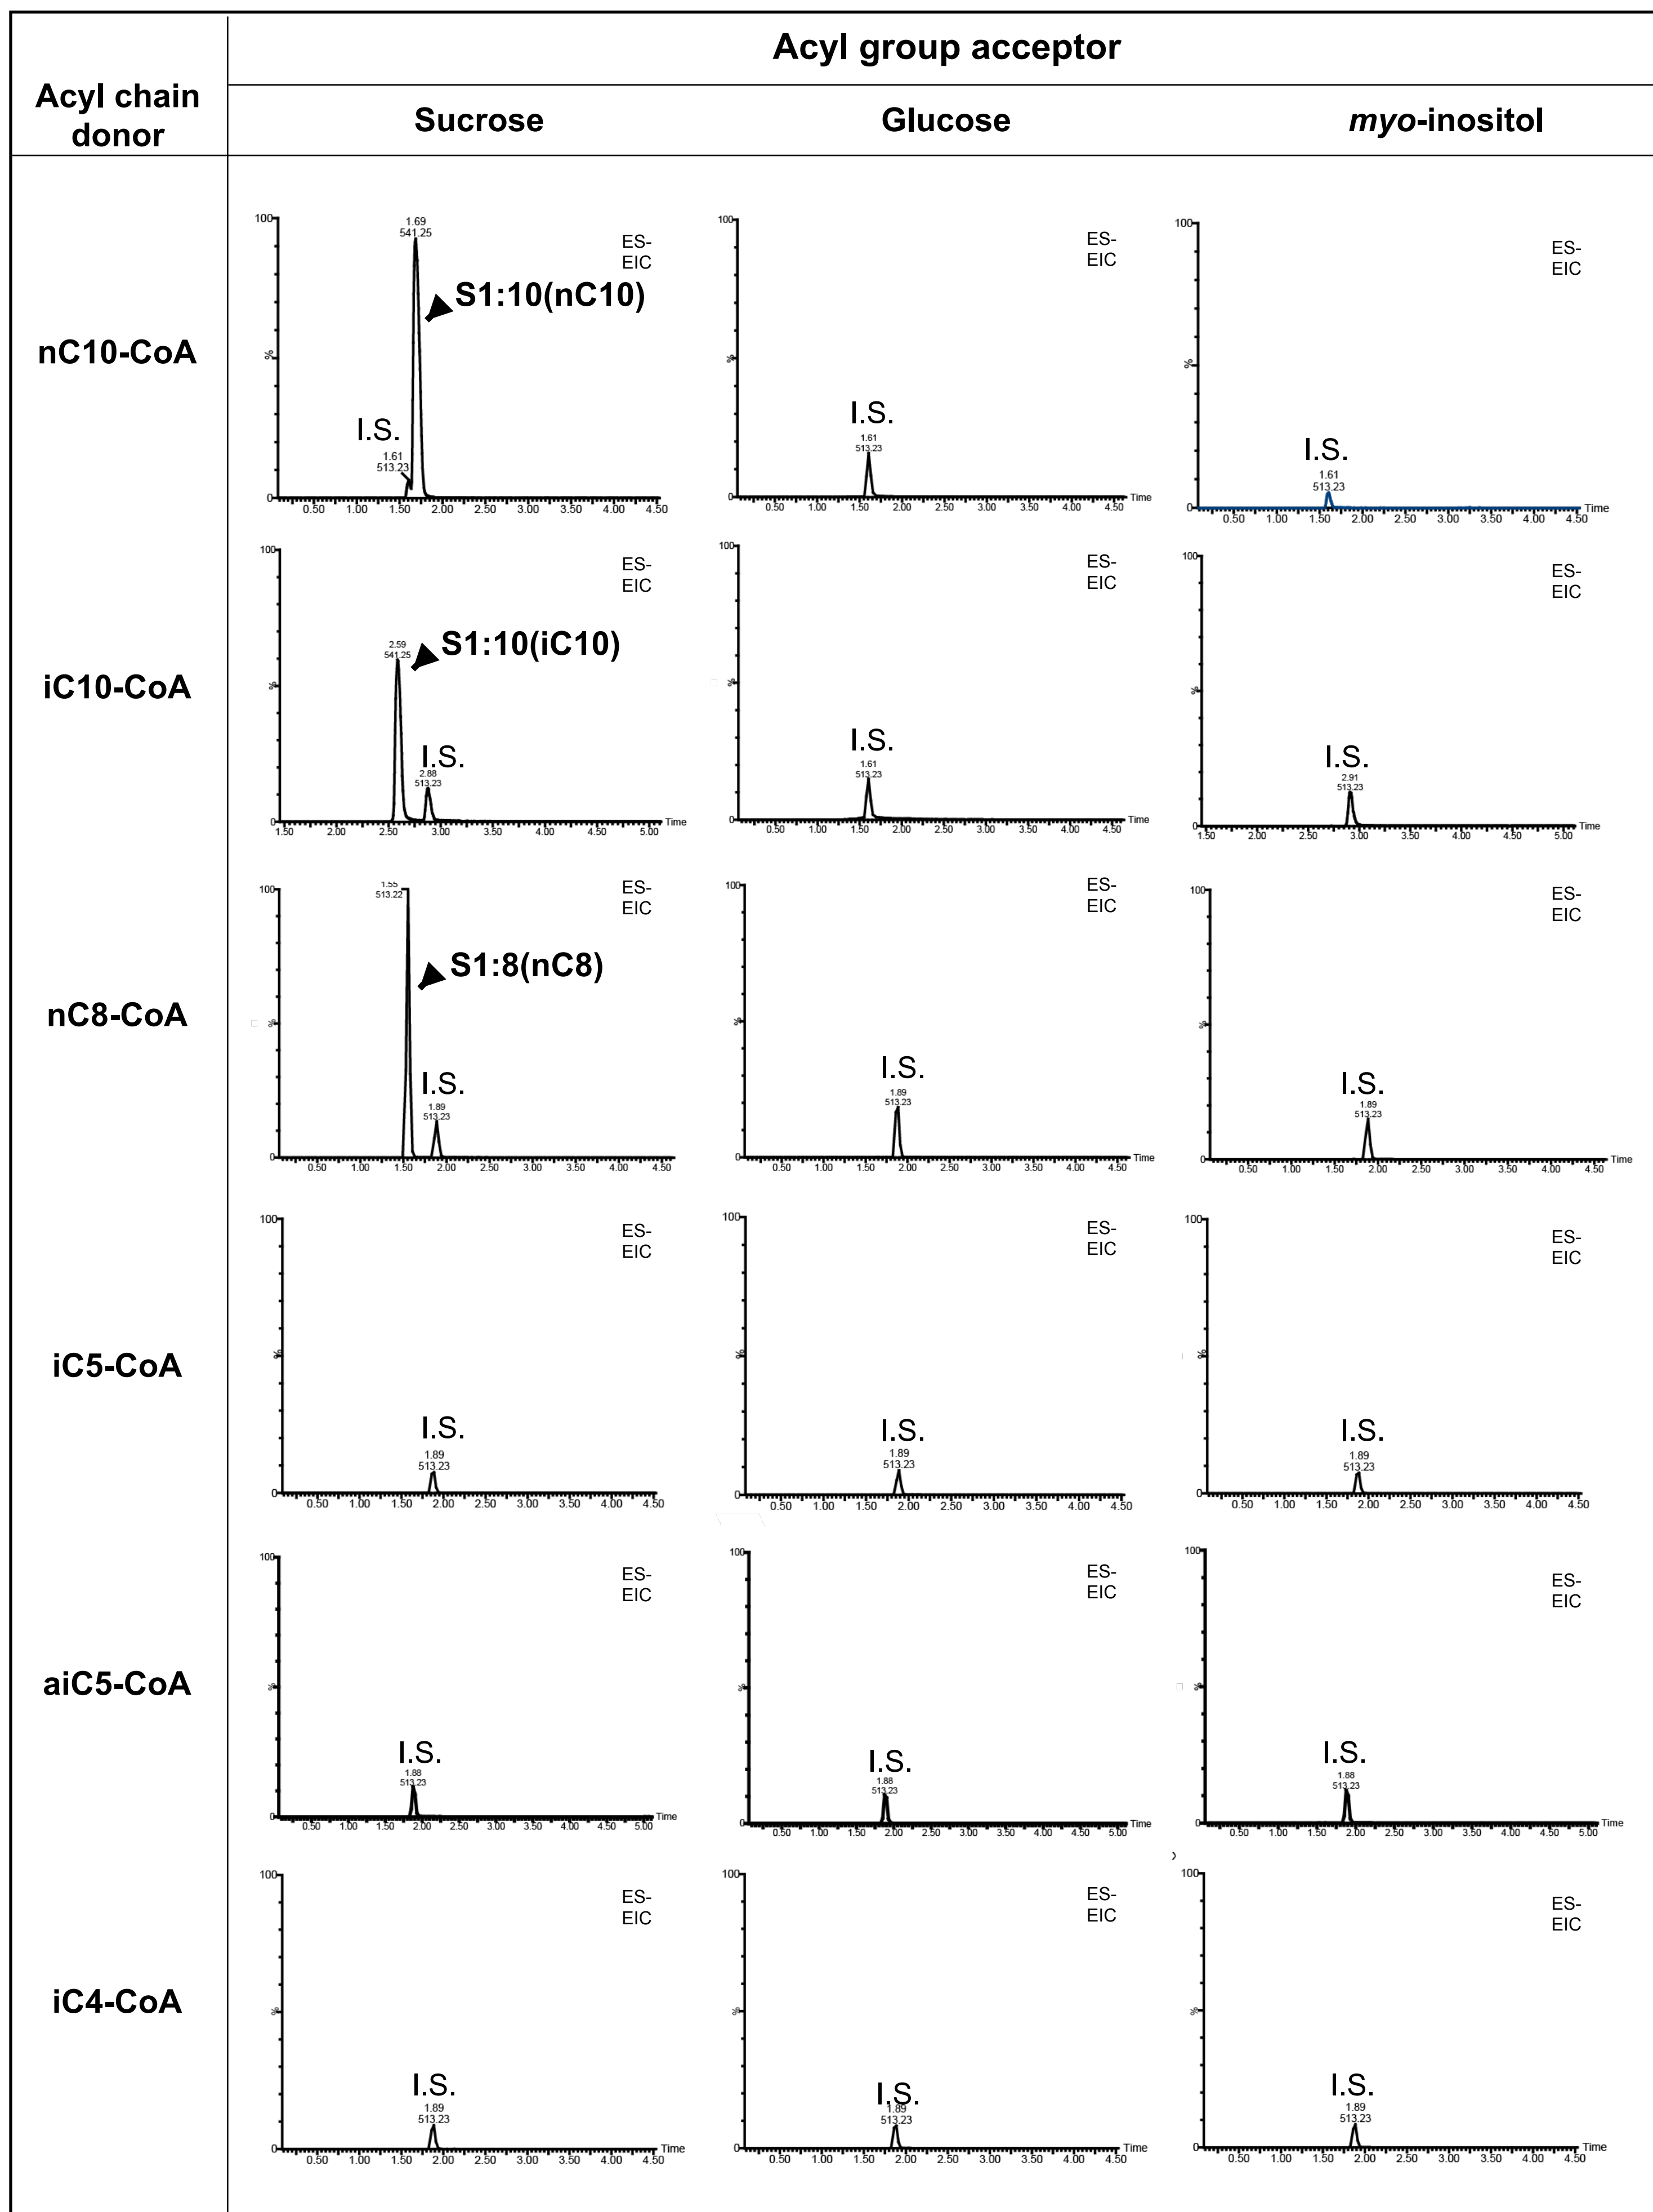

Supplemental Figure 8

**Fig. S8. SnASAT1 activities with different acyl chain donors and acyl group acceptors.**

Acylsugars were analyzed using LC-MS in ESI- mode. Combined extracted ion chromatogram showing internal standard telmisartan ( $m/z$  513.23) and expected products as formate adducts: top two rows from left to right, S1:10 ( $m/z$  541.25), G1:10 ( $m/z$  379.21) and I1:10 ( $m/z$  379.21); third row from left to right, S1:8 ( $m/z$  513.22), G1:8 ( $m/z$  351.17) and I1:8 ( $m/z$  351.17); fourth and fifth rows from left to right, S1:5 ( $m/z$  471.18), G1:5 ( $m/z$  309.12) and I1:5 ( $m/z$  309.12); bottom from left to right, S1:4 ( $m/z$  457.16), G1:4 ( $m/z$  295.11) and I1:4 ( $m/z$  295.11).

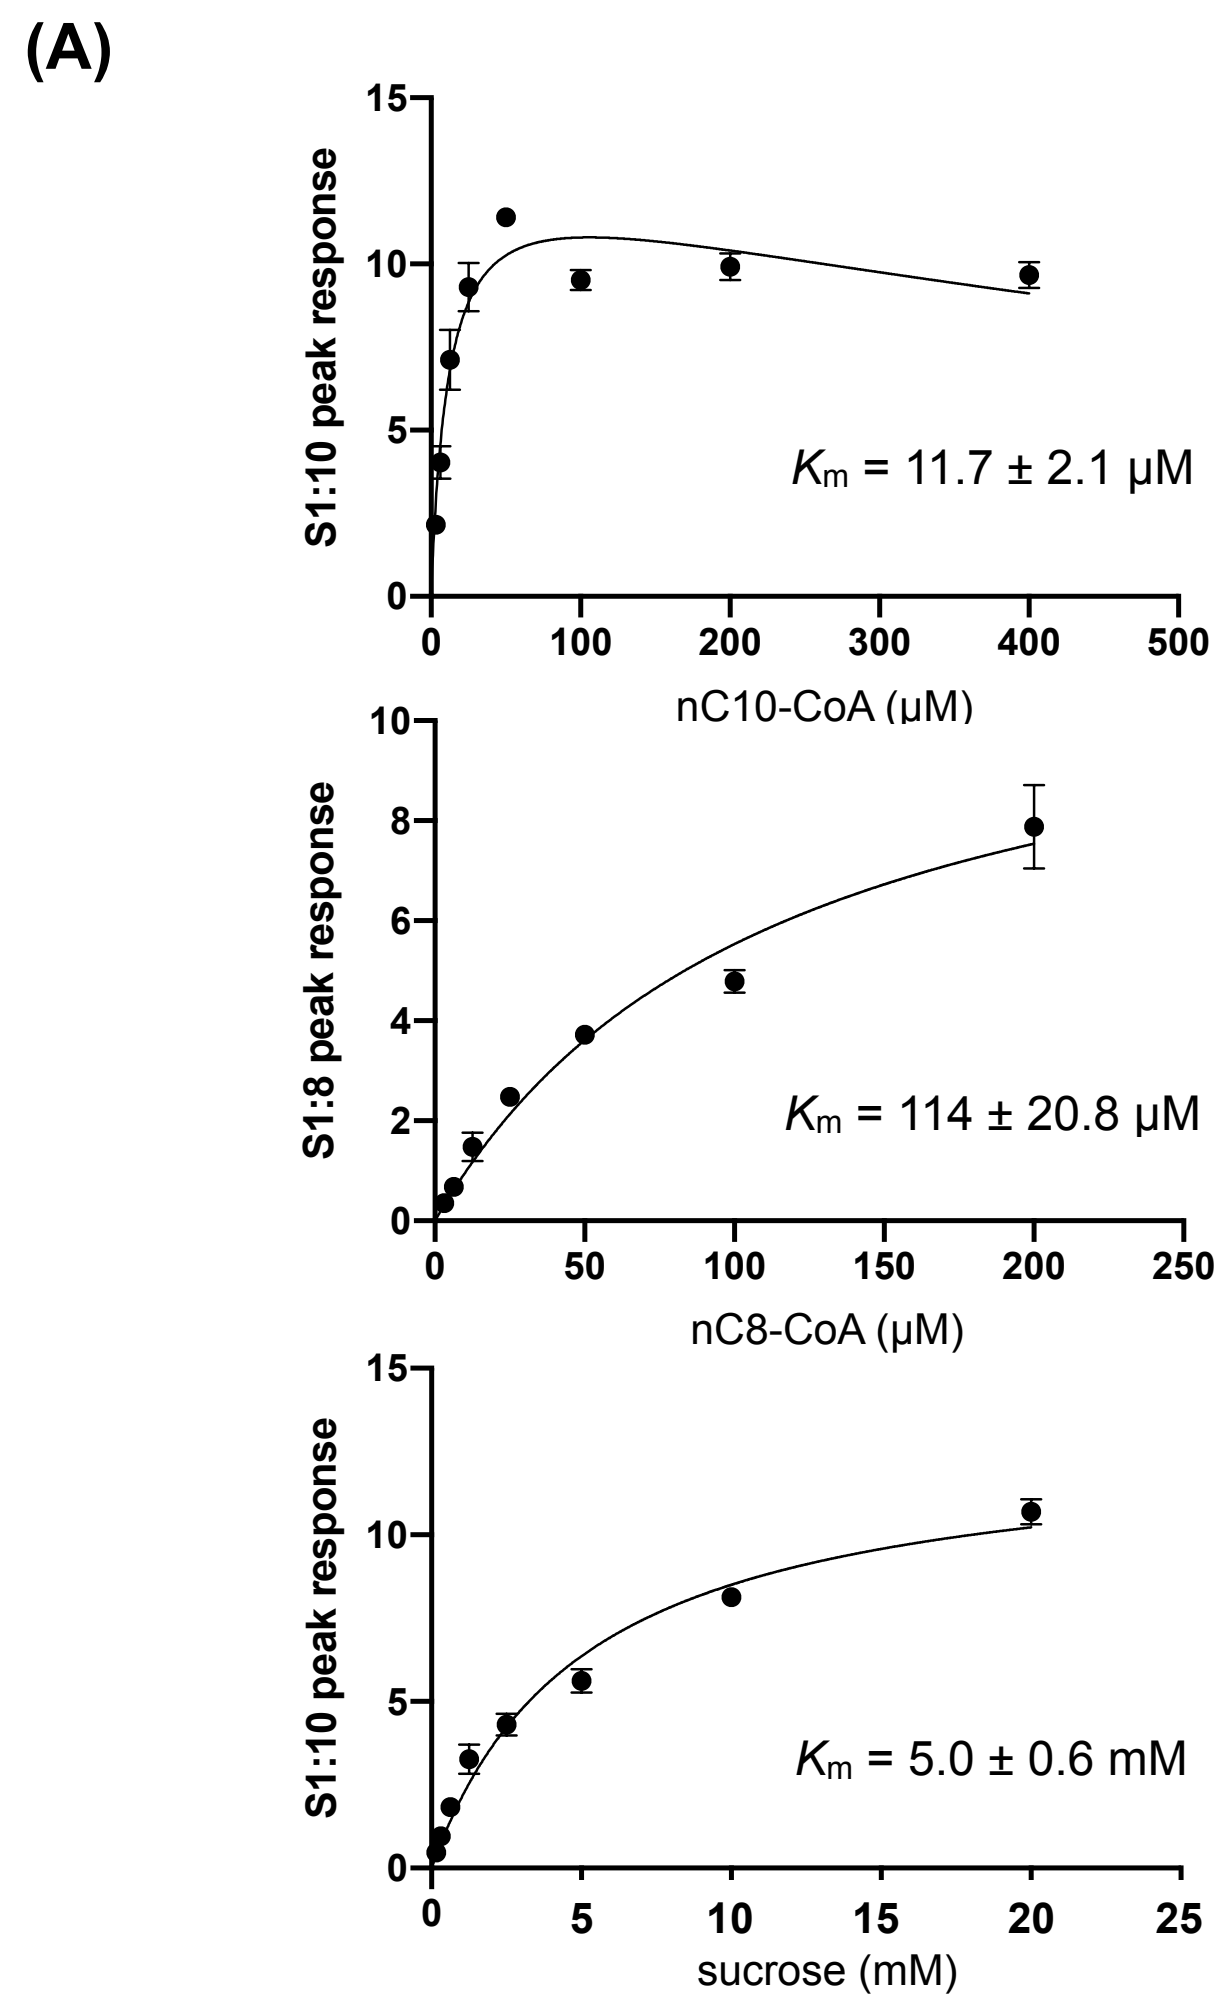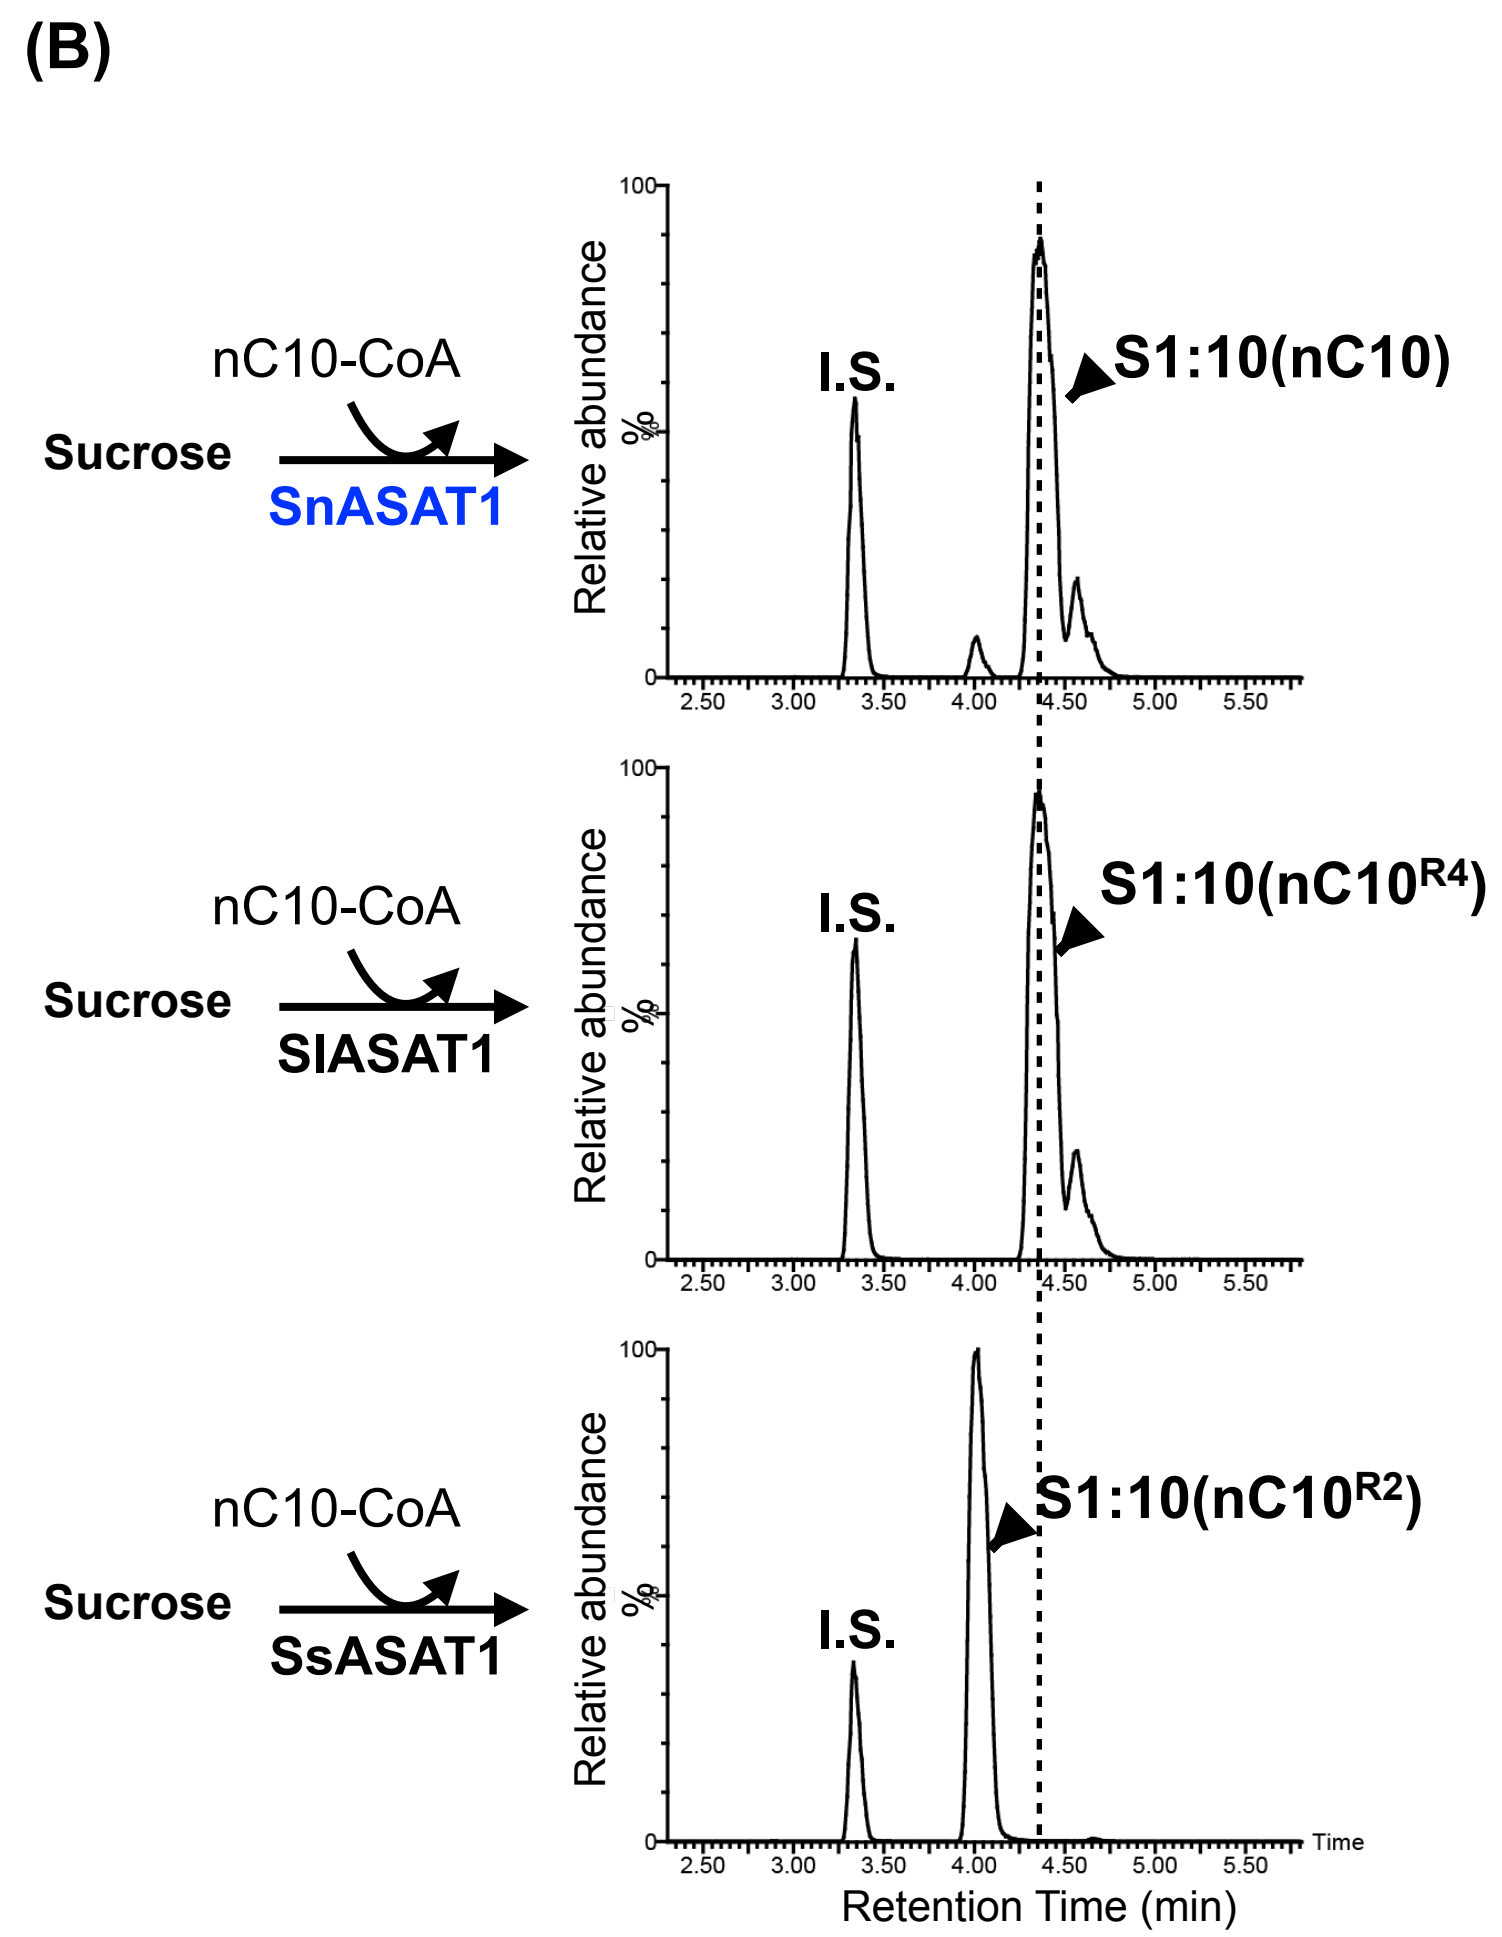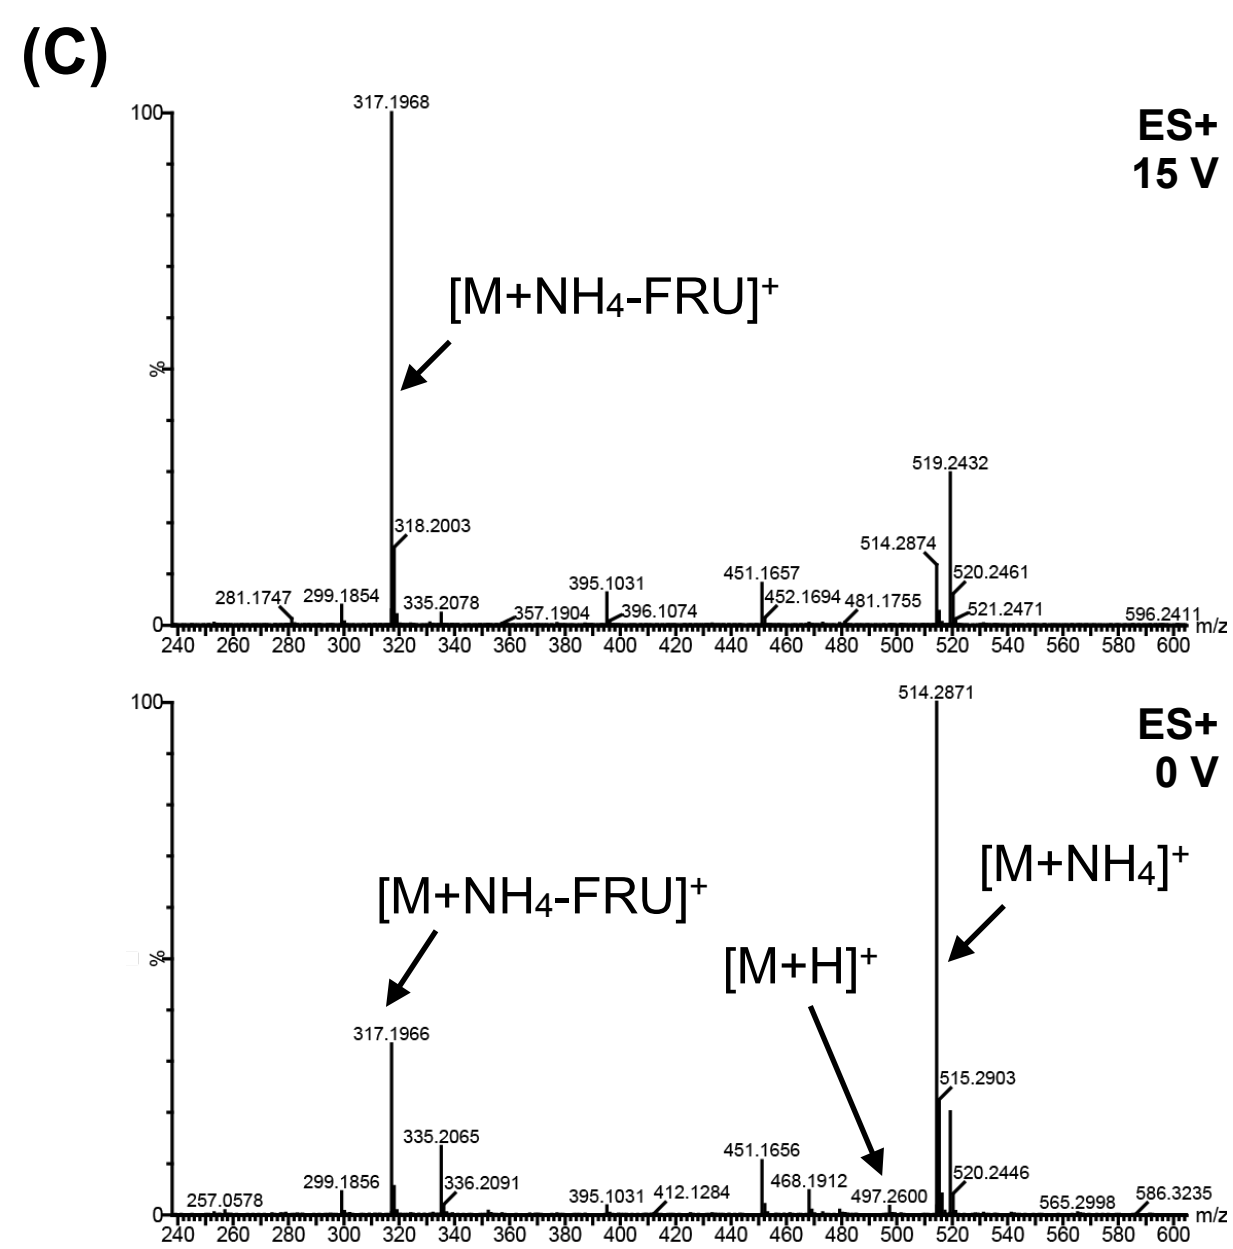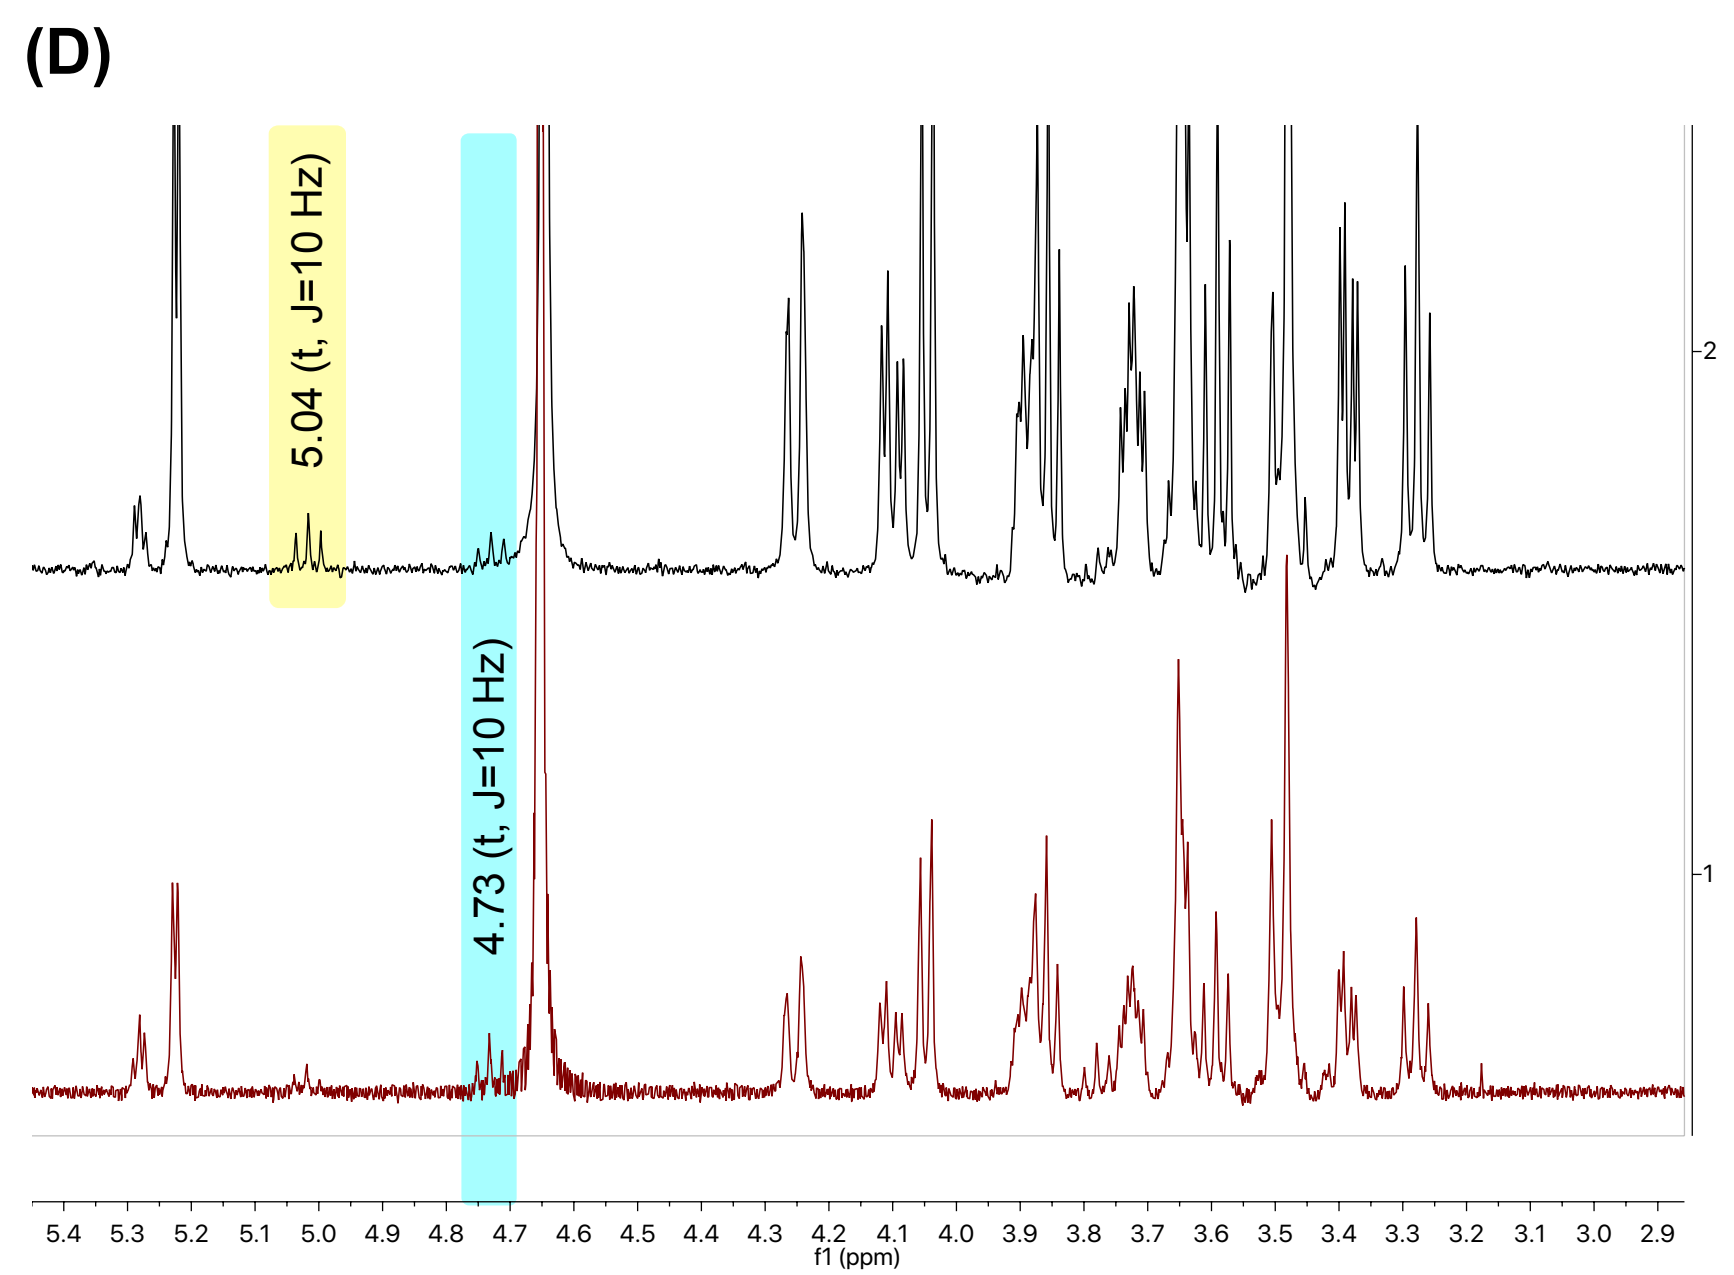

**Fig. S9. SnASAT1 generates monoacylsucroses with a medium-length acyl chain on the R<sub>4</sub> position.** (A) Kinetics analysis of different substrates for SnASAT1. Apparent  $K_m$  were calculated using the non-regression model in the GraphPad Prism 5 software. The enzyme assay products' peak area was normalized to the internal standard telmisartan peak area and plotted for each concentration of the varying substrate. Error bars indicate standard error with  $n = 3$ . (B) Co-chromatography of S1:10(10) produced by SnASAT1 (top), SIASAT1 (middle) and SsASAT1 (bottom). Acylation positions of SIASAT1- and SsASAT1-produced S1:10(10) were verified by NMR<sup>1,2</sup>. (C) ESI+ spectra under CID potential 15V of product ions generated from  $[M+NH_4]^+$  of SnASAT1-produced S1:10 results in neutral loss of unacylated fructose moiety. (D) Proton NMR determined the major S1:10(10) isomer is acylated at the R<sub>4</sub> position [4(CH) = 4.73 (t, J=10Hz); top and bottom spectrum]. A second, chromatographically separable S1:10 minor isomer with acylation at R<sub>6</sub> position [6(CH) = 5.04 (t, J=10Hz); top spectrum] accumulates after extended enzyme assay incubation time.

(A)

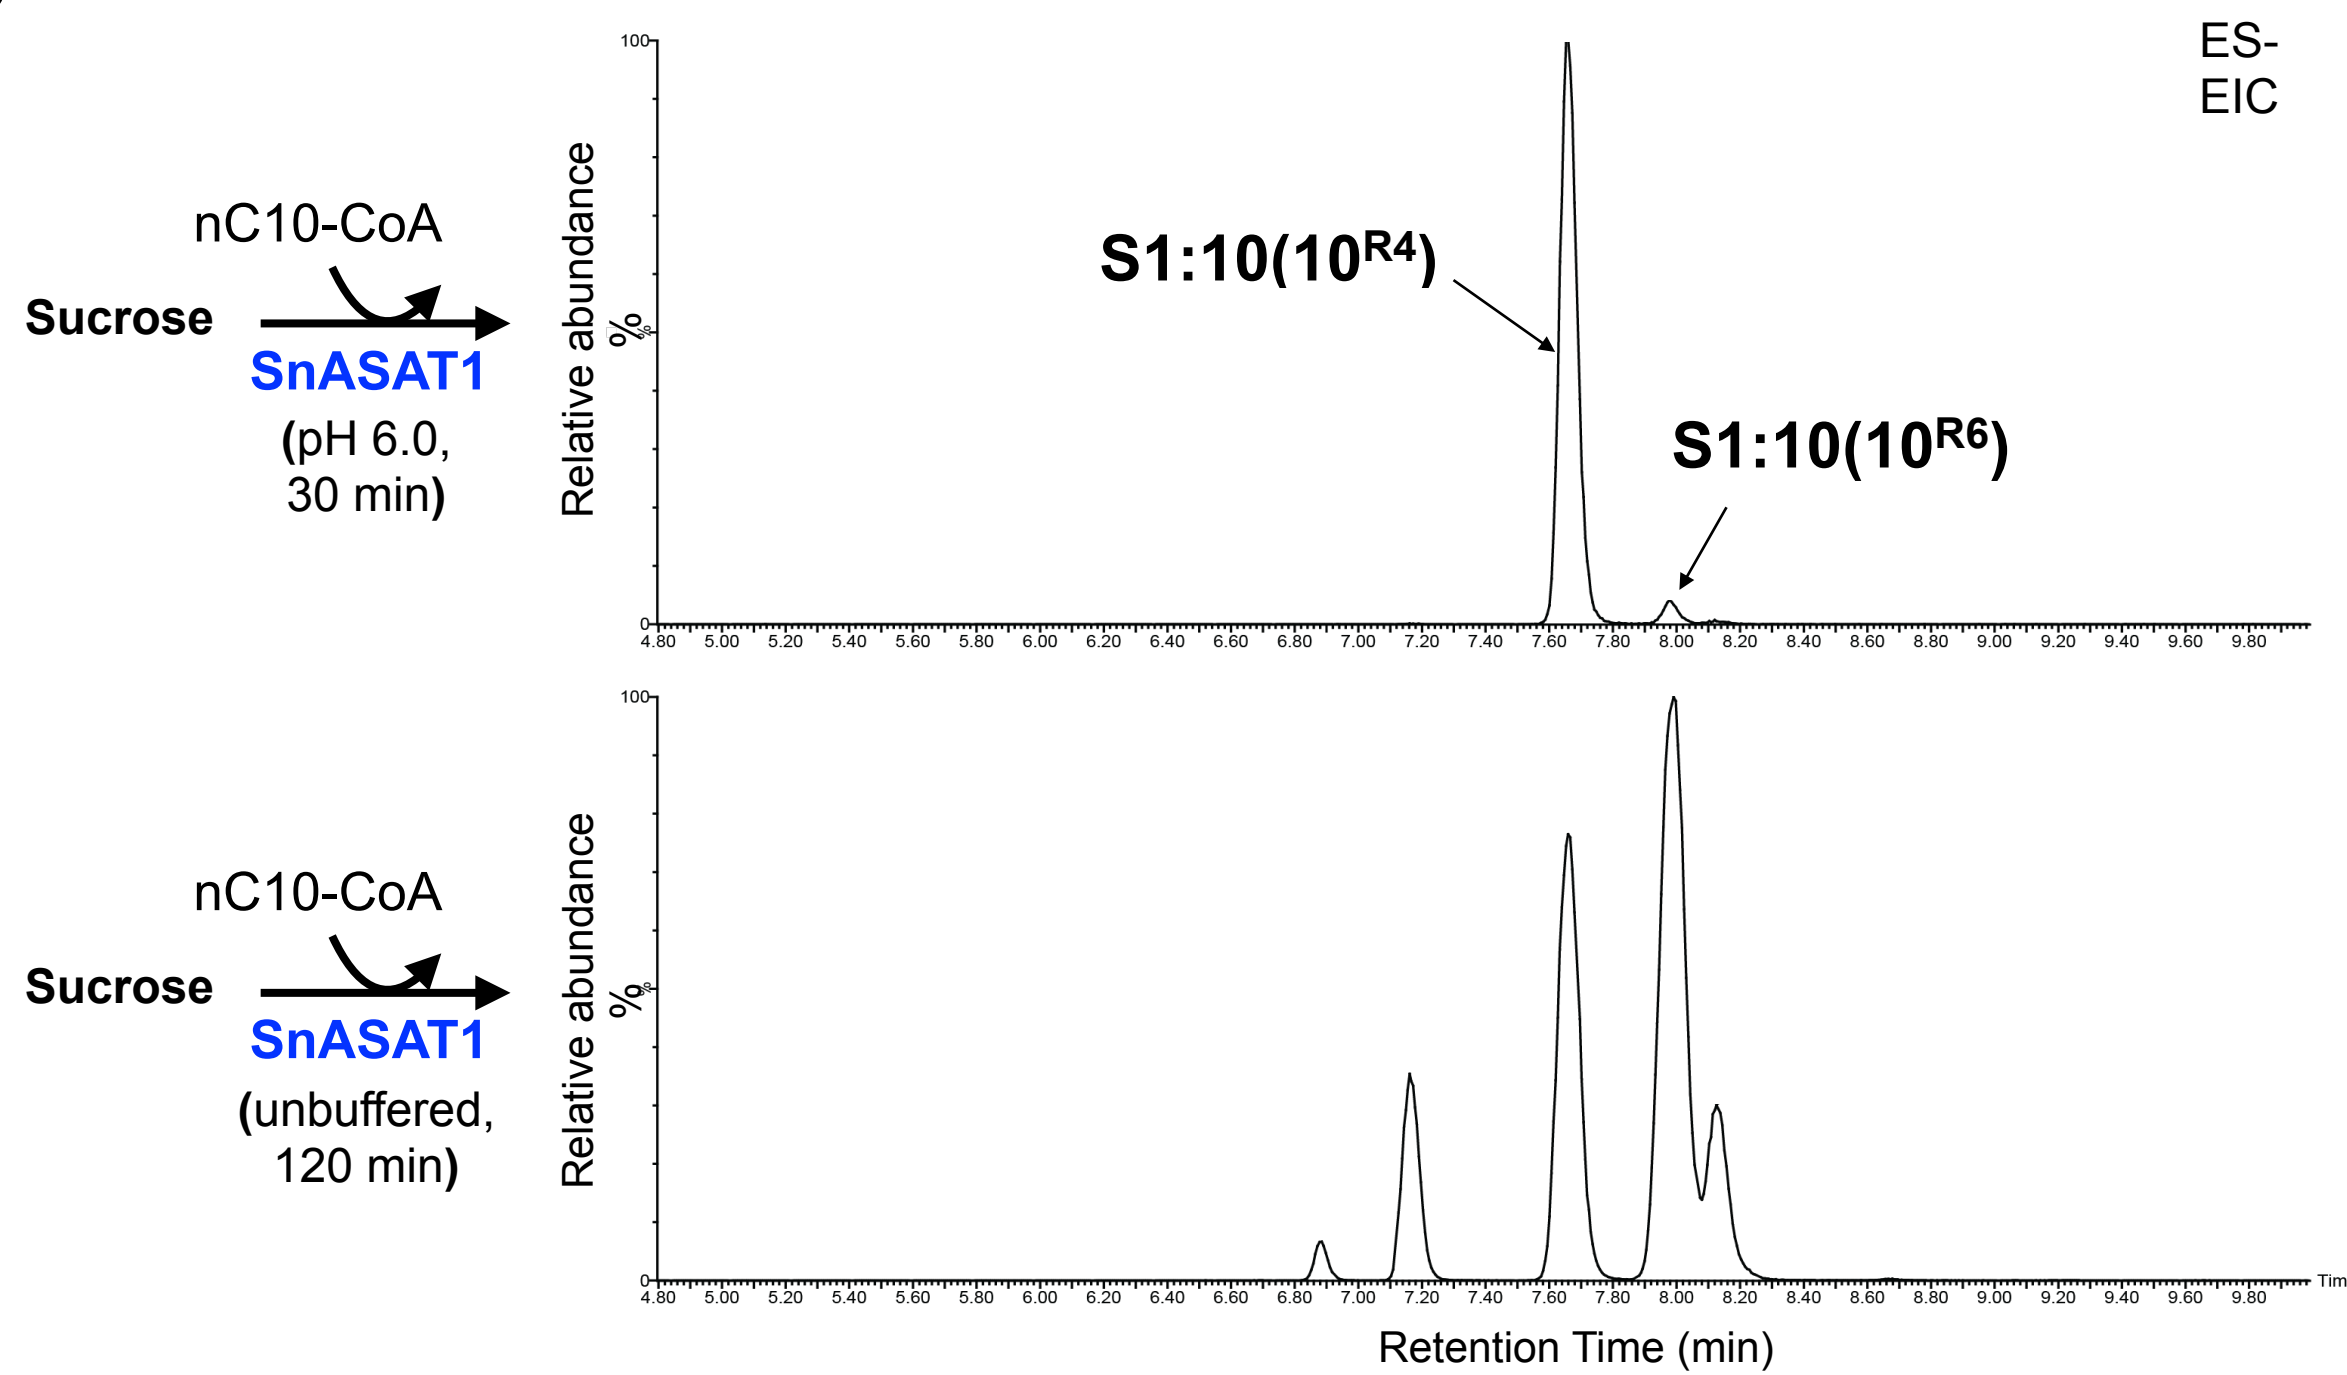

(B)

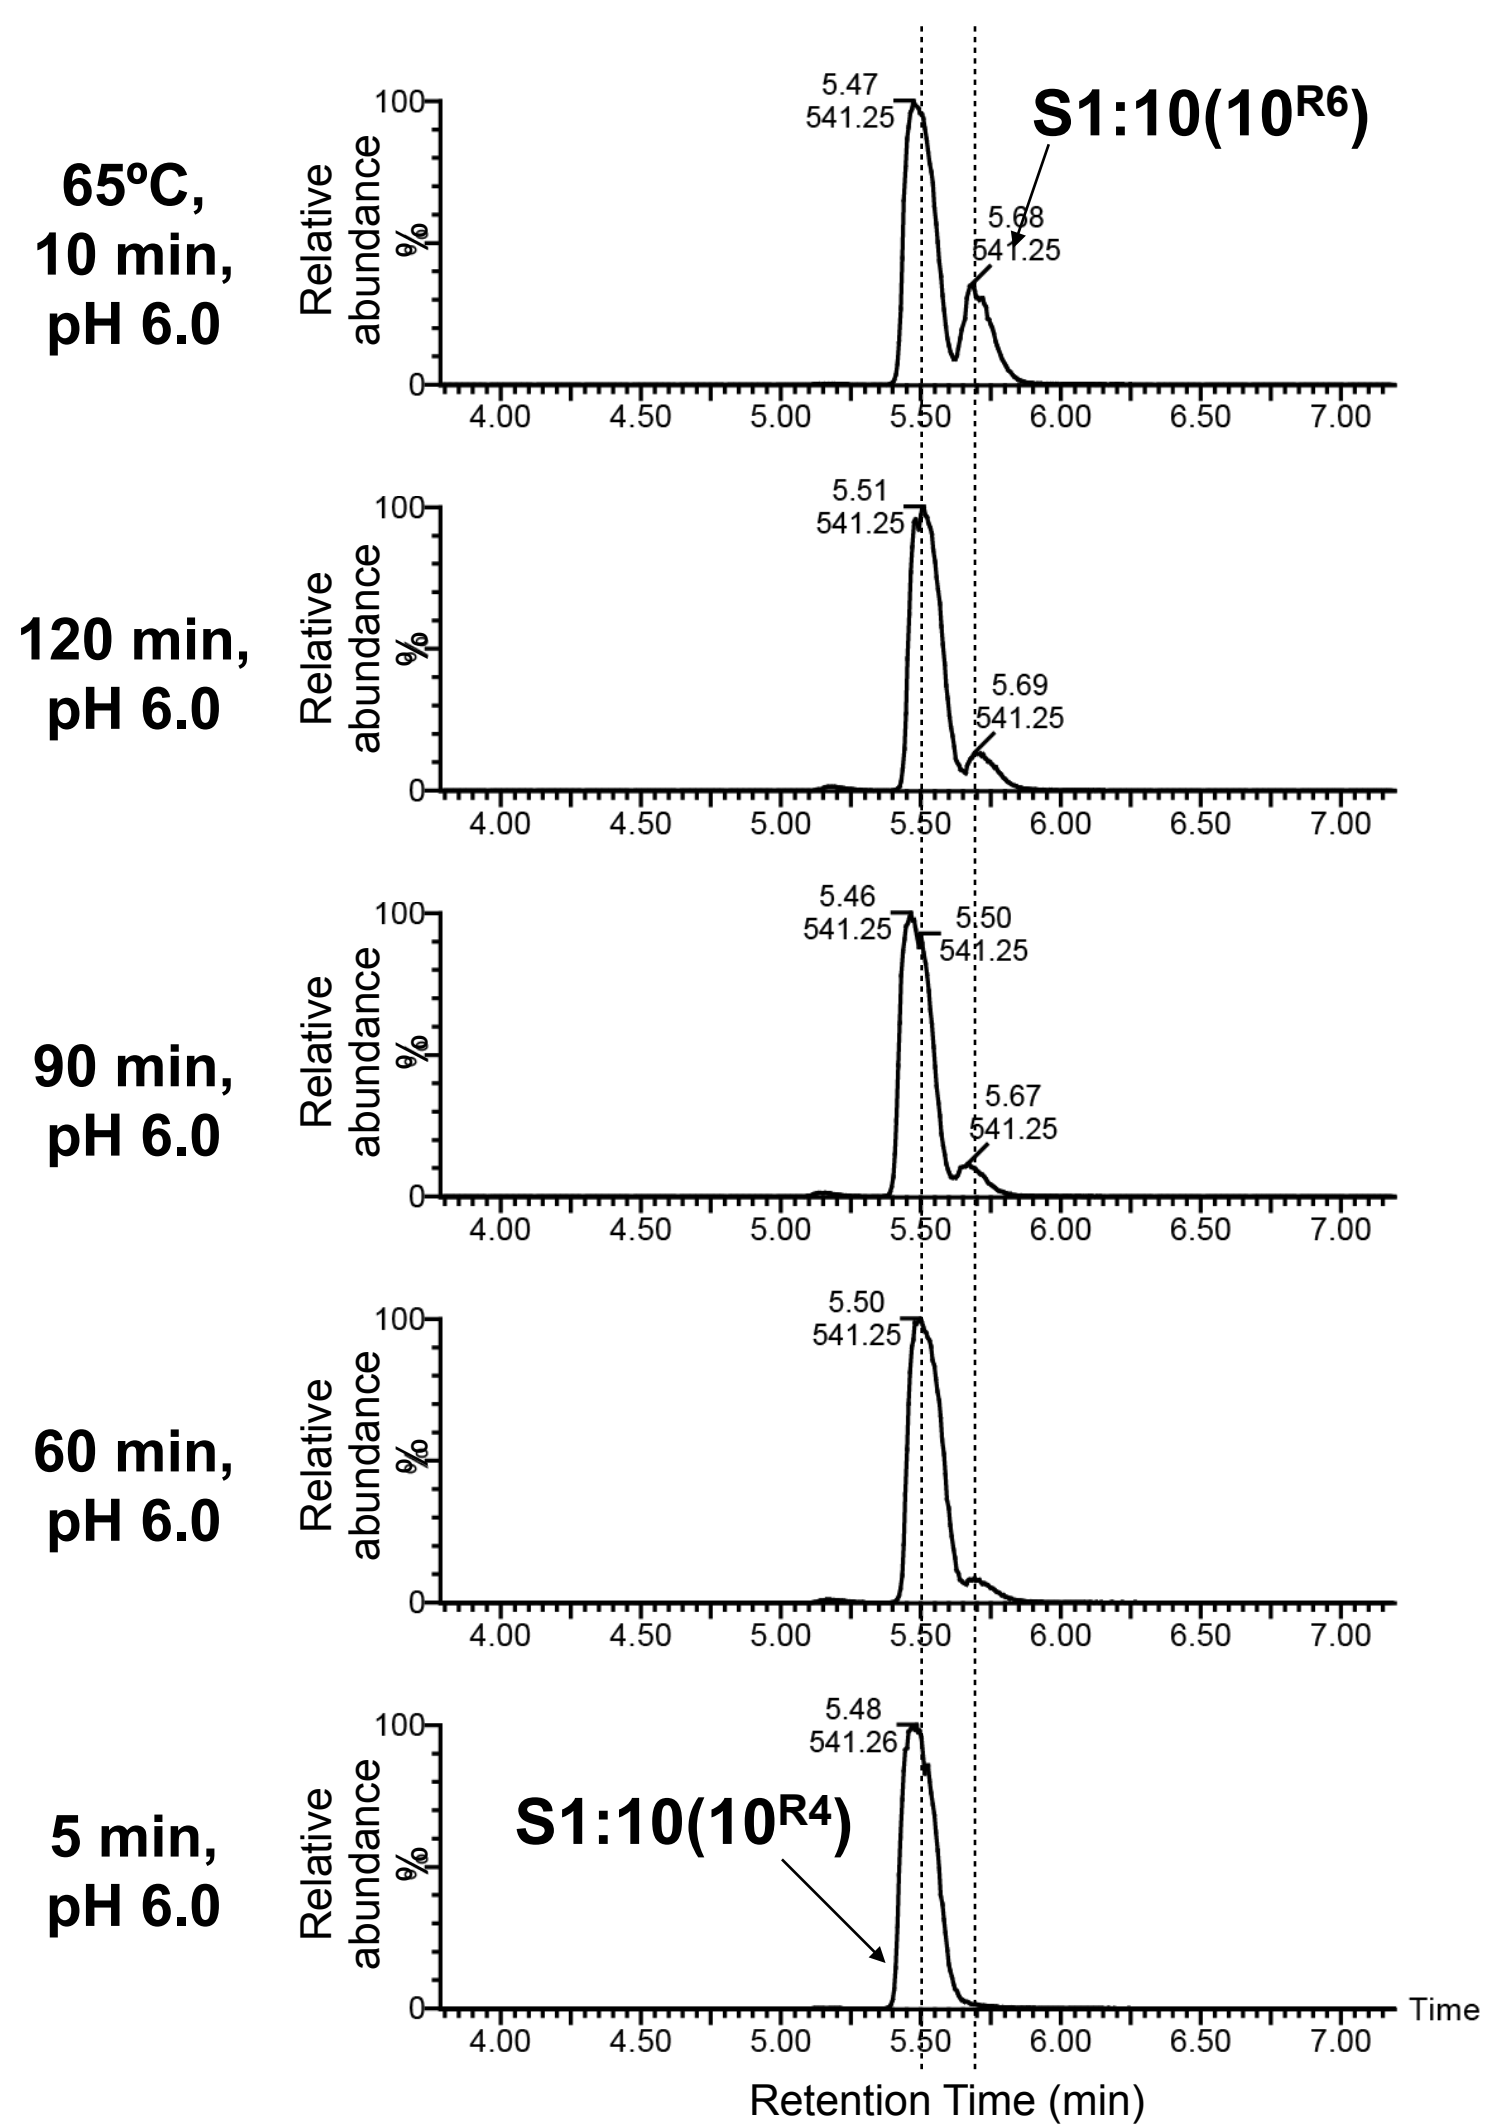

(C)

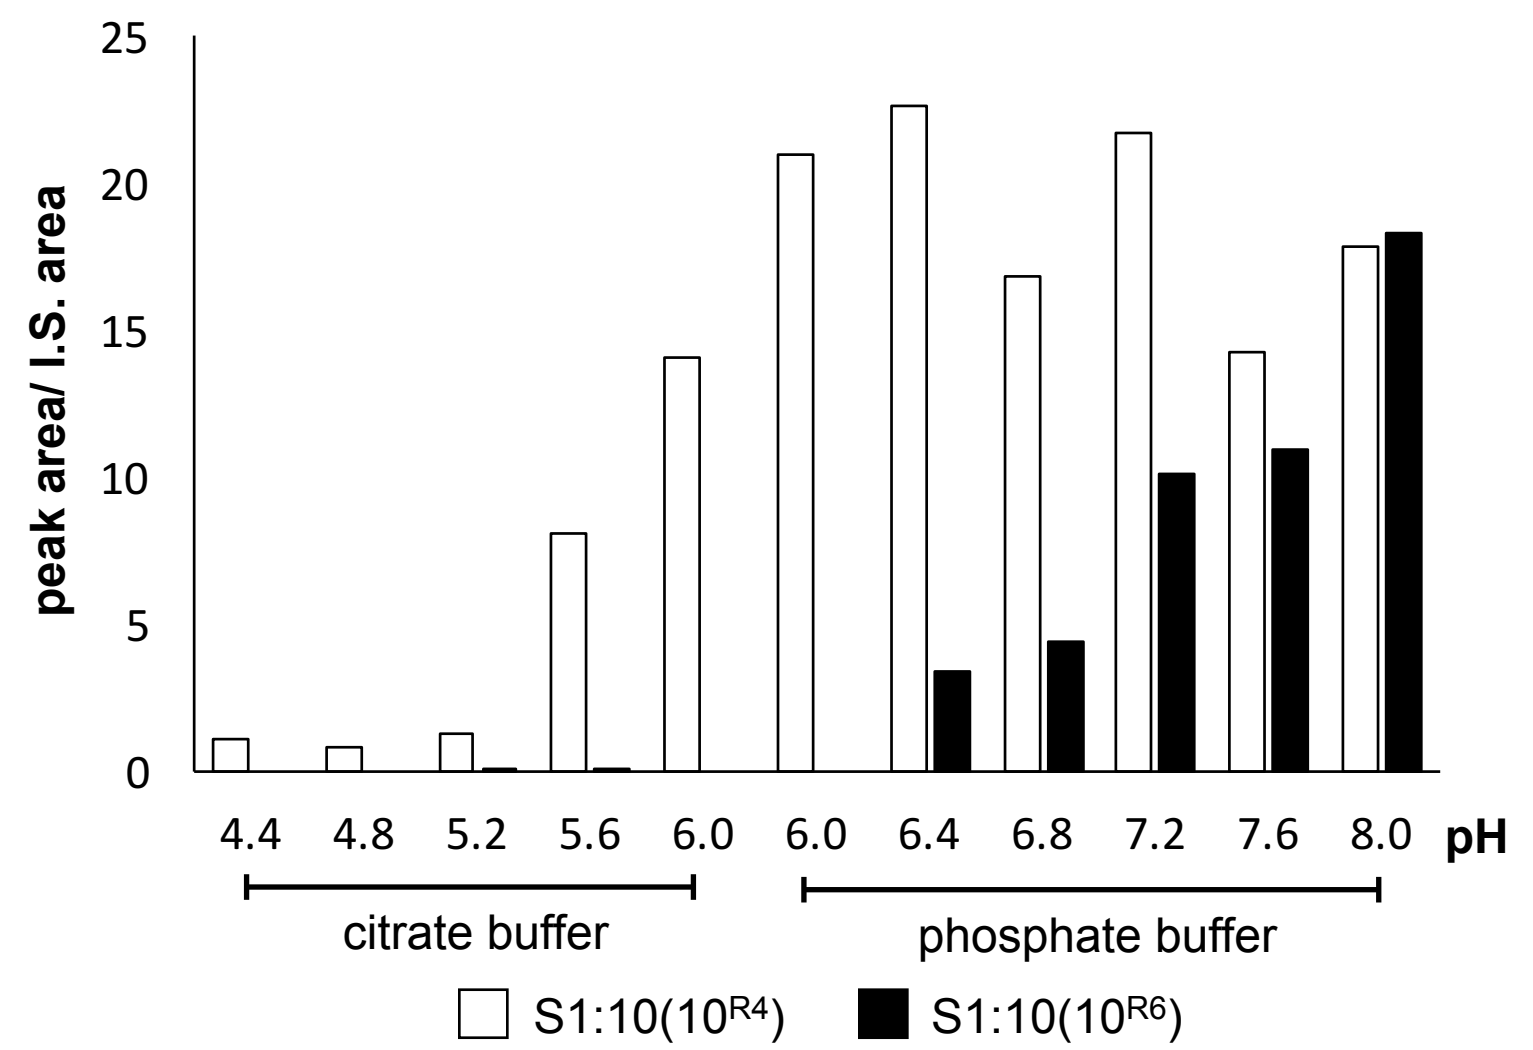

(D)

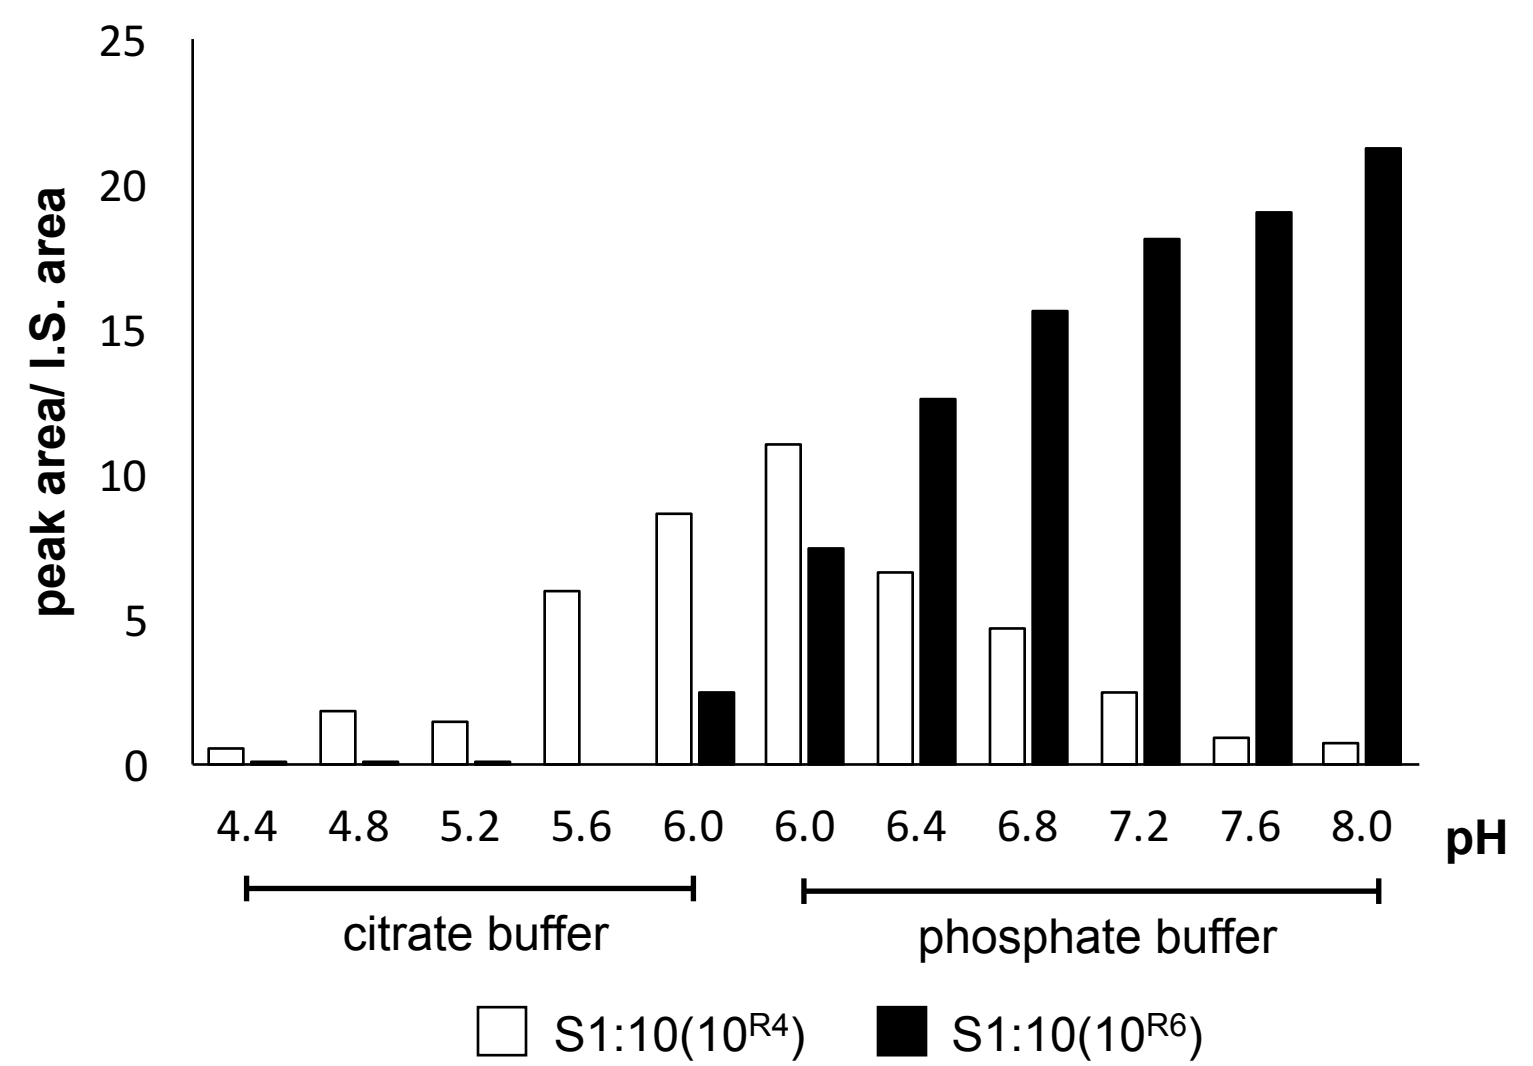



**Fig. S10. R<sub>6</sub>-acylated S1:10 isomer accumulates in SnASAT1 enzyme assays.** (A) The co-chromatography of S1:10(10) isomers produced by SnASAT1 under pH 6.0 for 30 min (top) and unbuffered aqueous solution for 120 min (bottom). (B) LC-MS profile of enzyme assays carried out with different incubation conditions R<sub>6</sub>-acylated S1:10 isomer accumulation increases after extended enzyme assay incubation time (bottom four) and brief exposure to elevated temperature (65°C) (top). (C) The concentration of the R<sub>6</sub>-acylated isomer increases when enzyme assays were carried out in neutral-to-alkaline pH conditions, or (D) subjected to brief exposure to elevated temperature (65°C). Acylsugars were analyzed using LC-MS in ESI- mode. Extracted ion chromatograms are showing formate adducts of S1:10(10) (*m/z* 541.25). Peak areas of S1:10(10) were integrated under negative mode and normalized to the internal standard telmisartan.

**(A) *in vitro* S2:14(iC4, nC10)**  
(*m/z* 584.33 in ESI+) from **SnASAT1+SnASAT2** *in vitro* assay

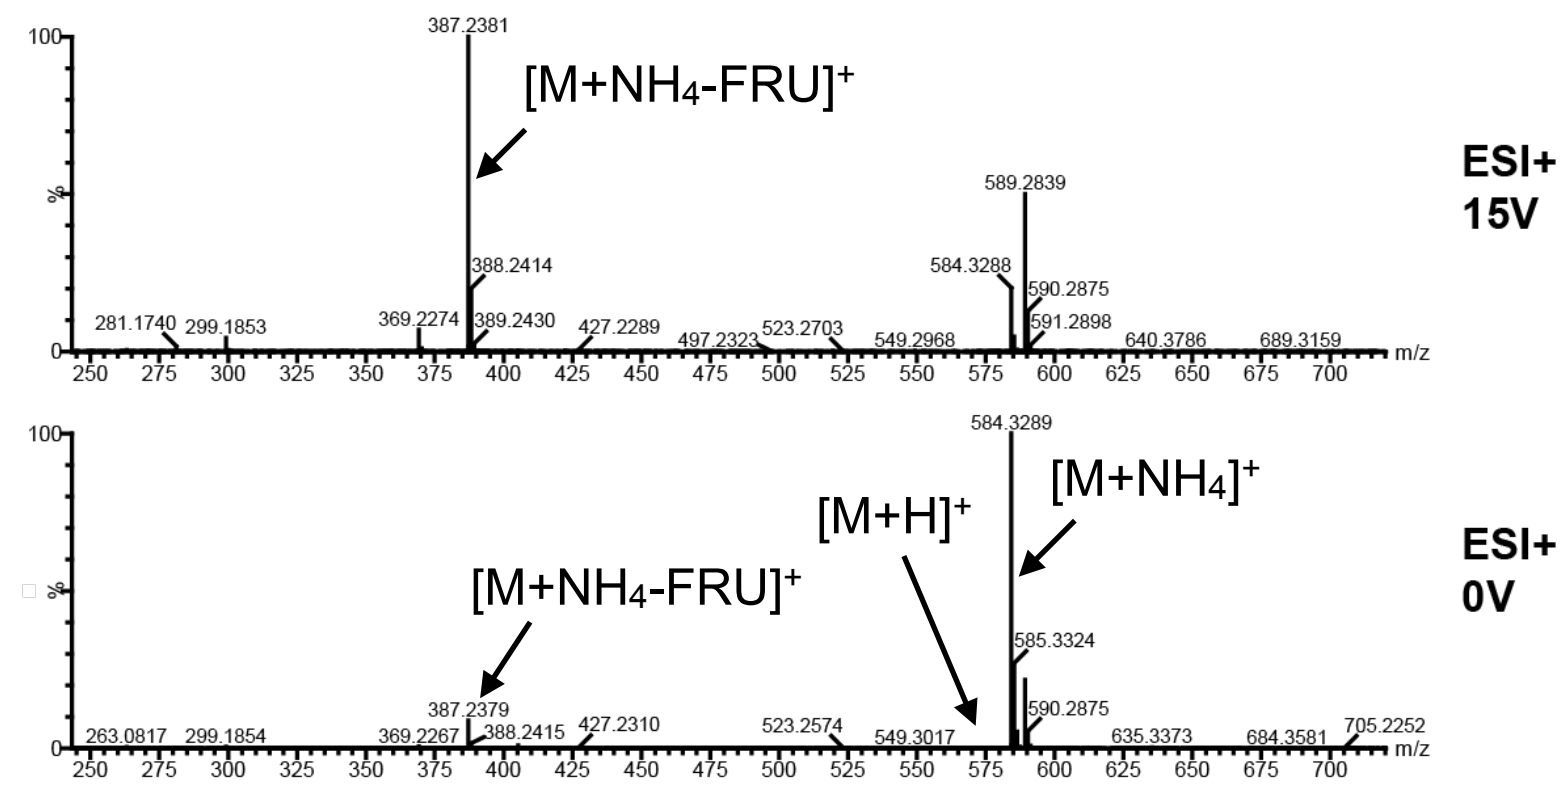

**(B) *in vitro* S2:14(iC4, nC10)**  
(*m/z* 611.29 in ESI-) from **SnASAT1+SnASAT2** *in vitro* assay

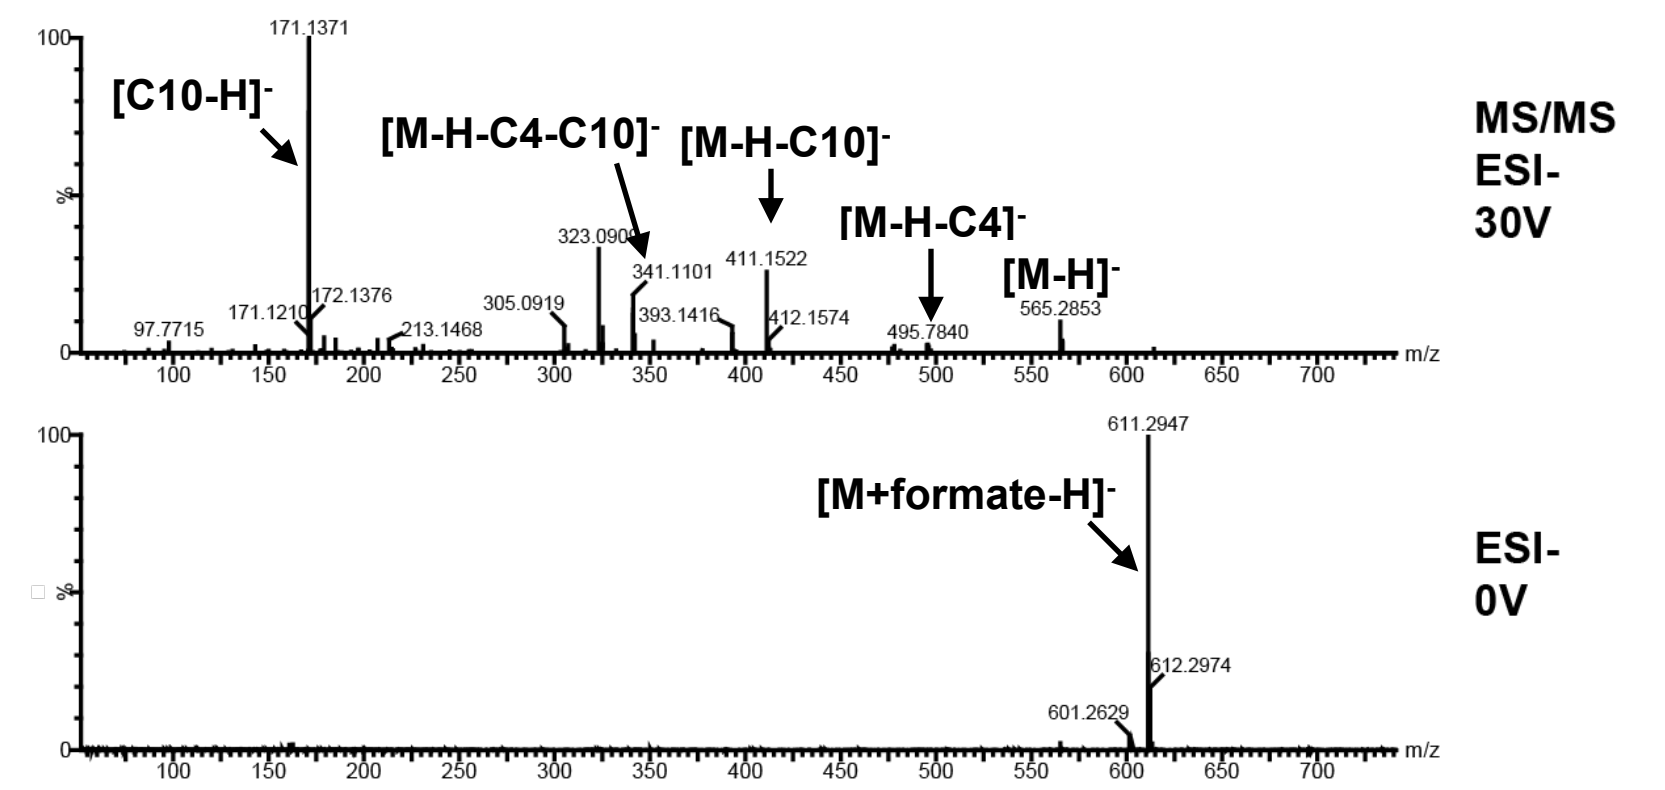

***in vivo* S2:14(4,10), late-eluting isomer**  
(*m/z* 584.33 in ESI+) purified from **VIGS-SnASFF1** lines

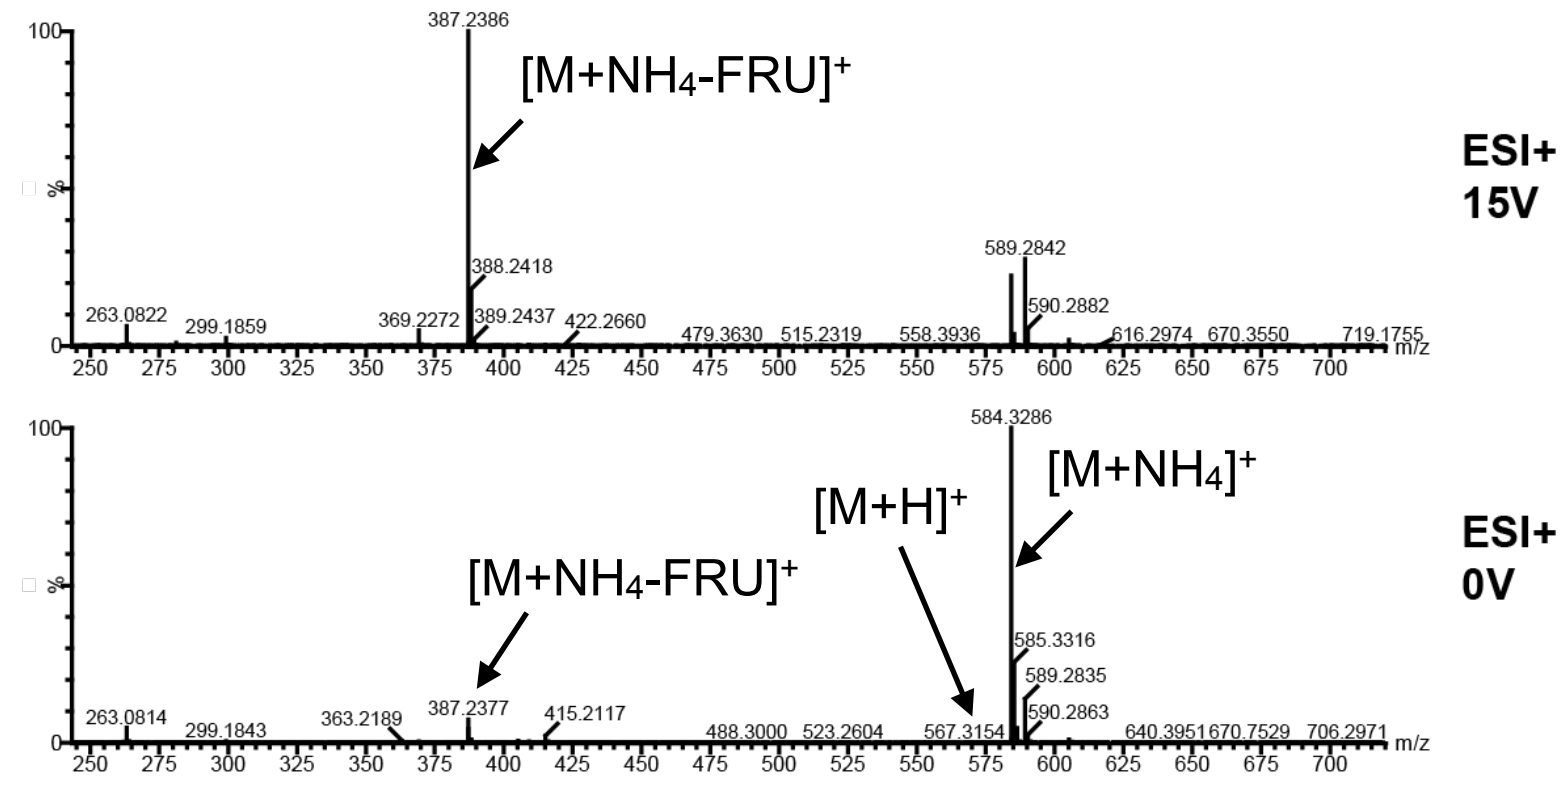

***in vivo* S2:14(4,10), late-eluting isomer**  
(*m/z* 611.29 in ESI-) purified from **VIGS-SnASFF1** lines

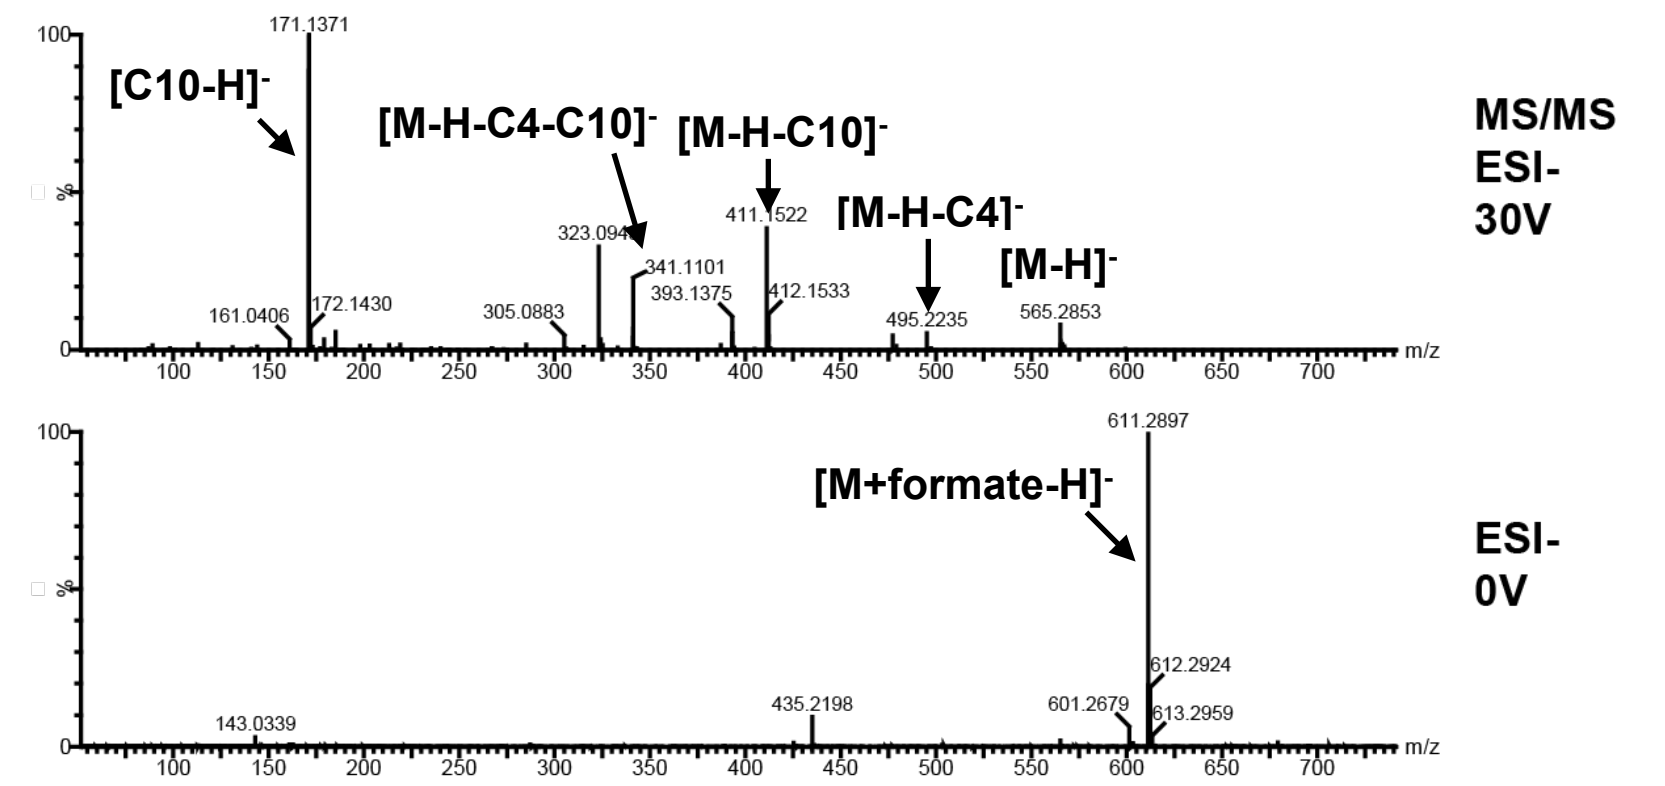

**(C) *in vitro* S2:14(iC4, iC10)**  
(*m/z* 611.29 in ESI-) from **SnASAT1+SnASAT2** *in vitro* assay

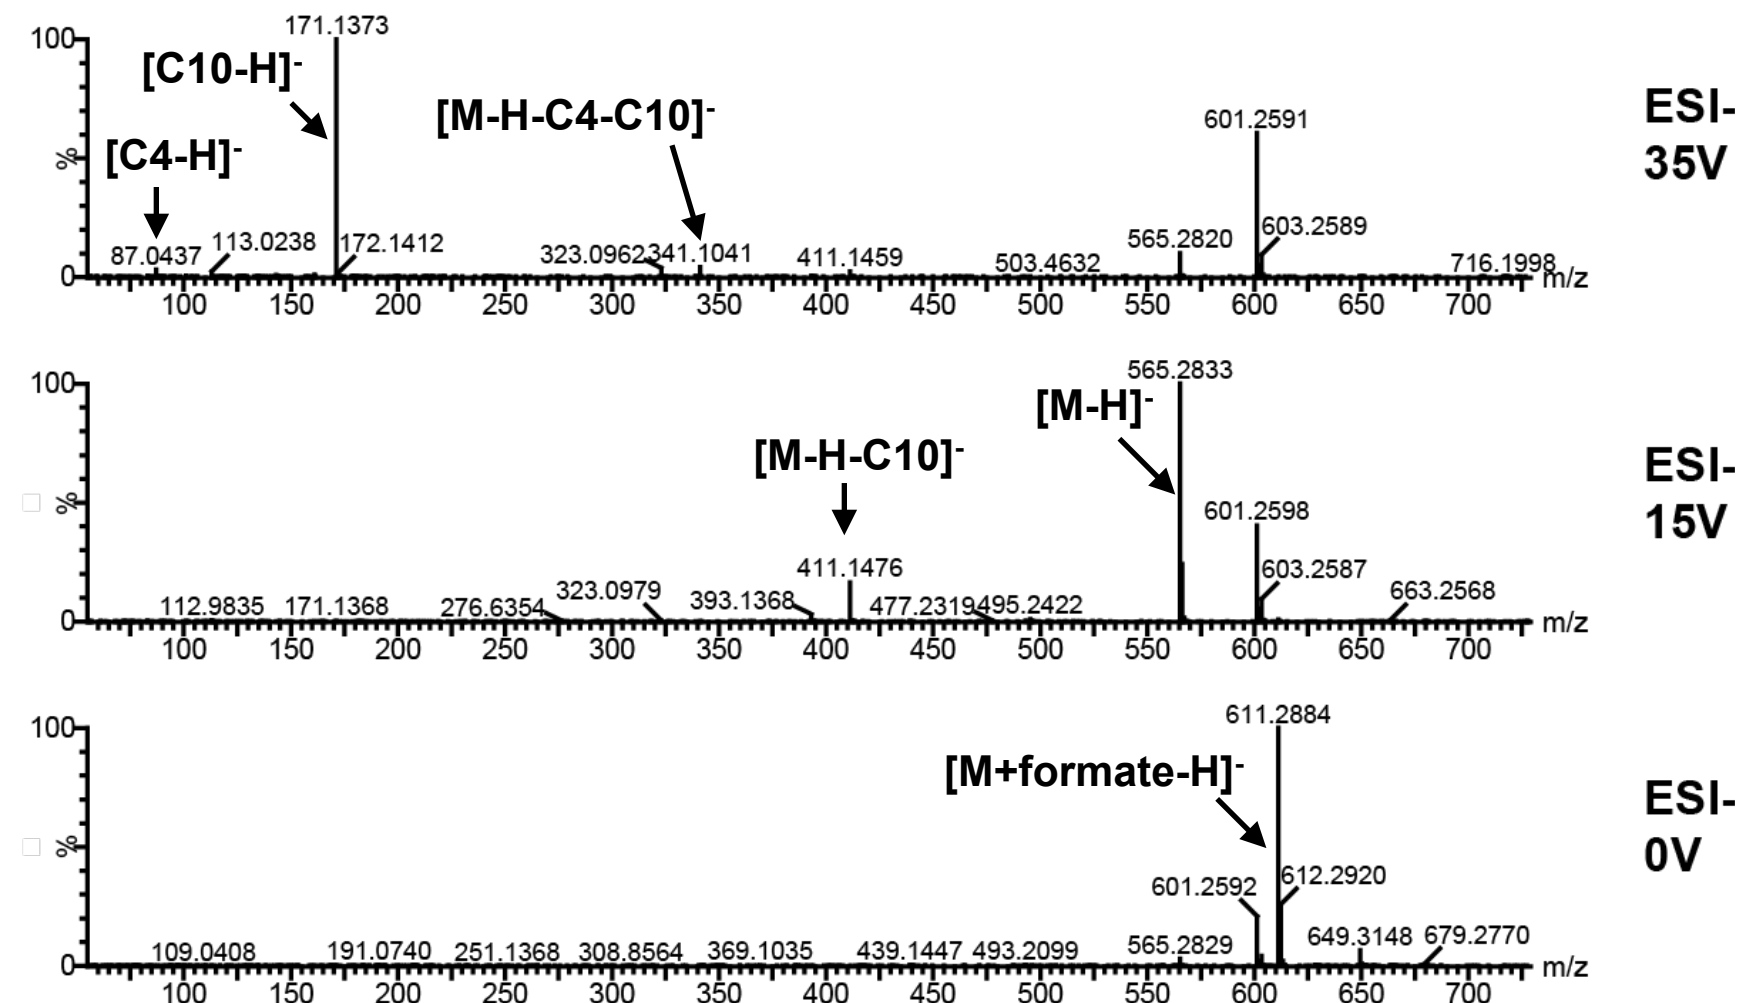

***in vivo* S2:14(4,10), early-eluting isomer**  
(*m/z* 611.29 in ESI-) purified from **VIGS-SnASFF1** lines

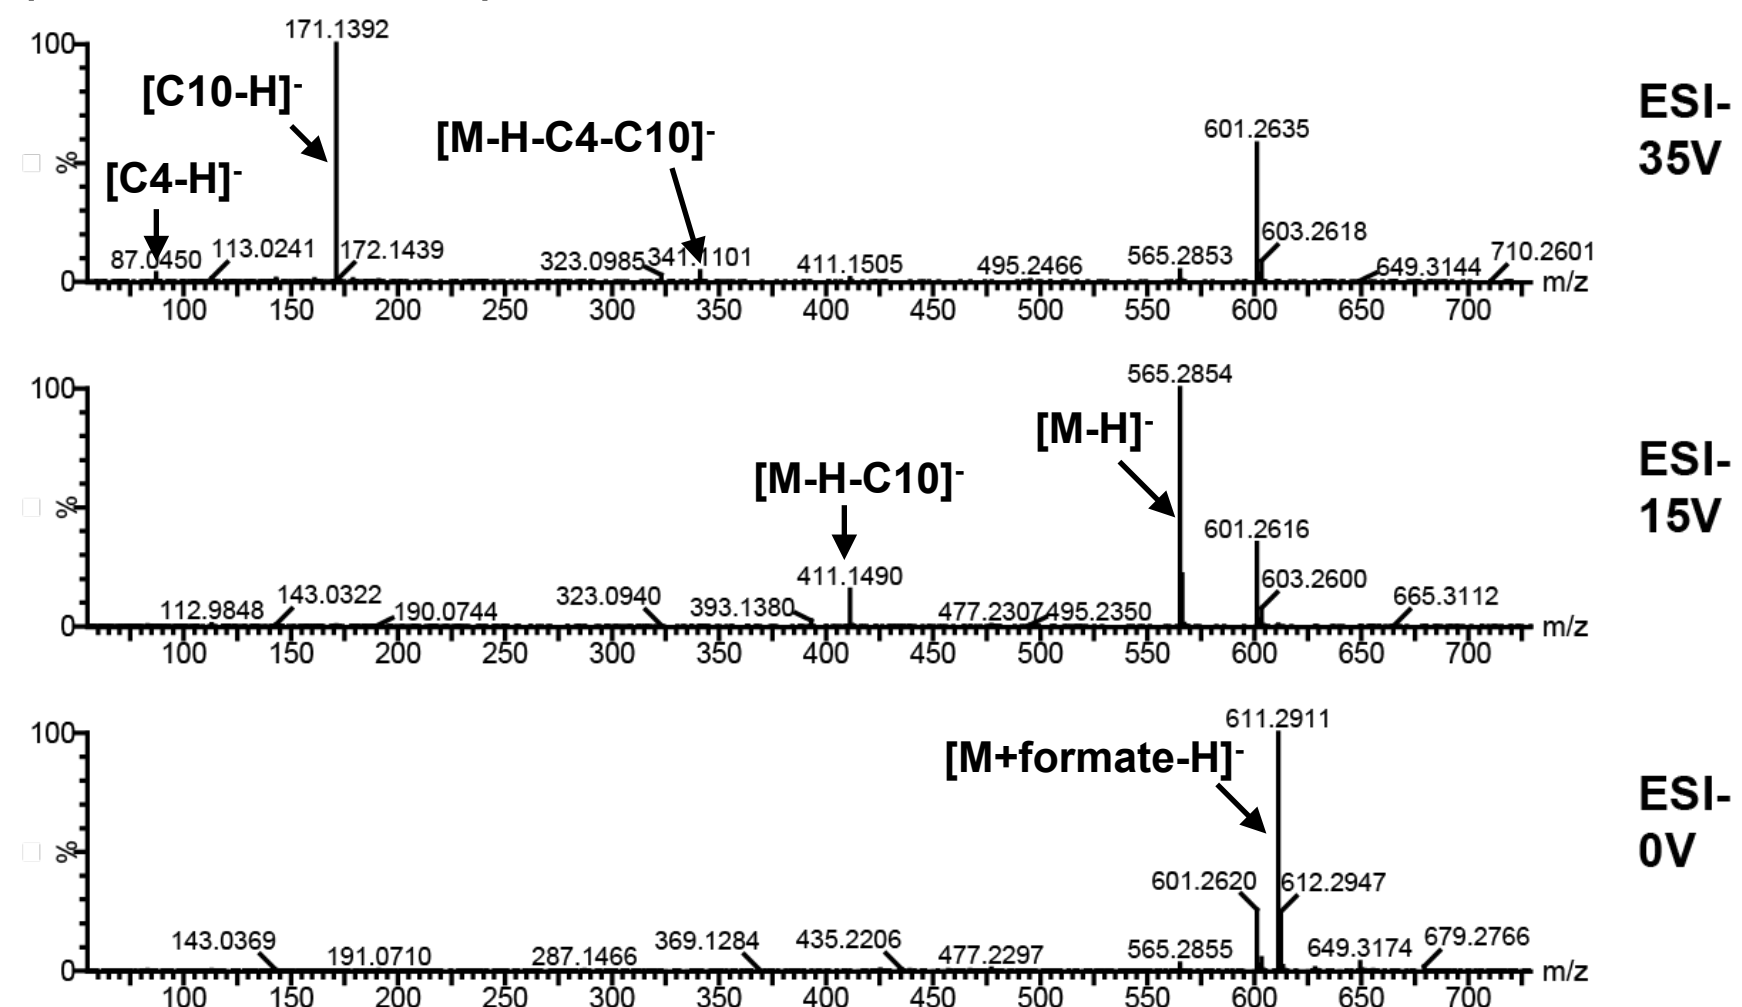

**Fig. S11. Mass spectra of the co-eluting *in vivo* and *in vitro* S2:14 isomers.** (A) ESI+ mode fragmentation of the co-eluting *in vitro* S2:14(iC4, nC10) and *in vivo* late-eluting S2:14(4,10) results in the cleavage of the glycosidic linkage. Fragment analysis of the acylsucroses using collision-induced dissociation reveals a fragment ion ( $m/z$  387.24) consistent with the furanose ring of sucrose conjugated to a C10 acyl chain, indicating that both acylsugars possess a C10 acyl chain on the furanose ring. (B) ESI- MS/MS spectra (30V) of product ions generated from [M+formate]<sup>-</sup> of the co-eluting *in vitro* S2:14(iC4, nC10) and *in vivo* late-eluting S2:14(4,10) isomer are both characterized by the loss of C4 and C10 ketenes and the presence of C10 fatty acid anions ( $m/z$  171.14). (C) Comparable fragmentation of the co-eluting *in vitro* S2:14(iC4, iC10) and *in vivo* early-eluting S2:14(4,10) isomer in ESI- mode reveals the loss of C4 and C10 ketenes under high collision energy (35V). The acyl chain combination is validated by the presence of C4 ( $m/z$  87.04) and C10 fatty acid anions ( $m/z$  171.14).

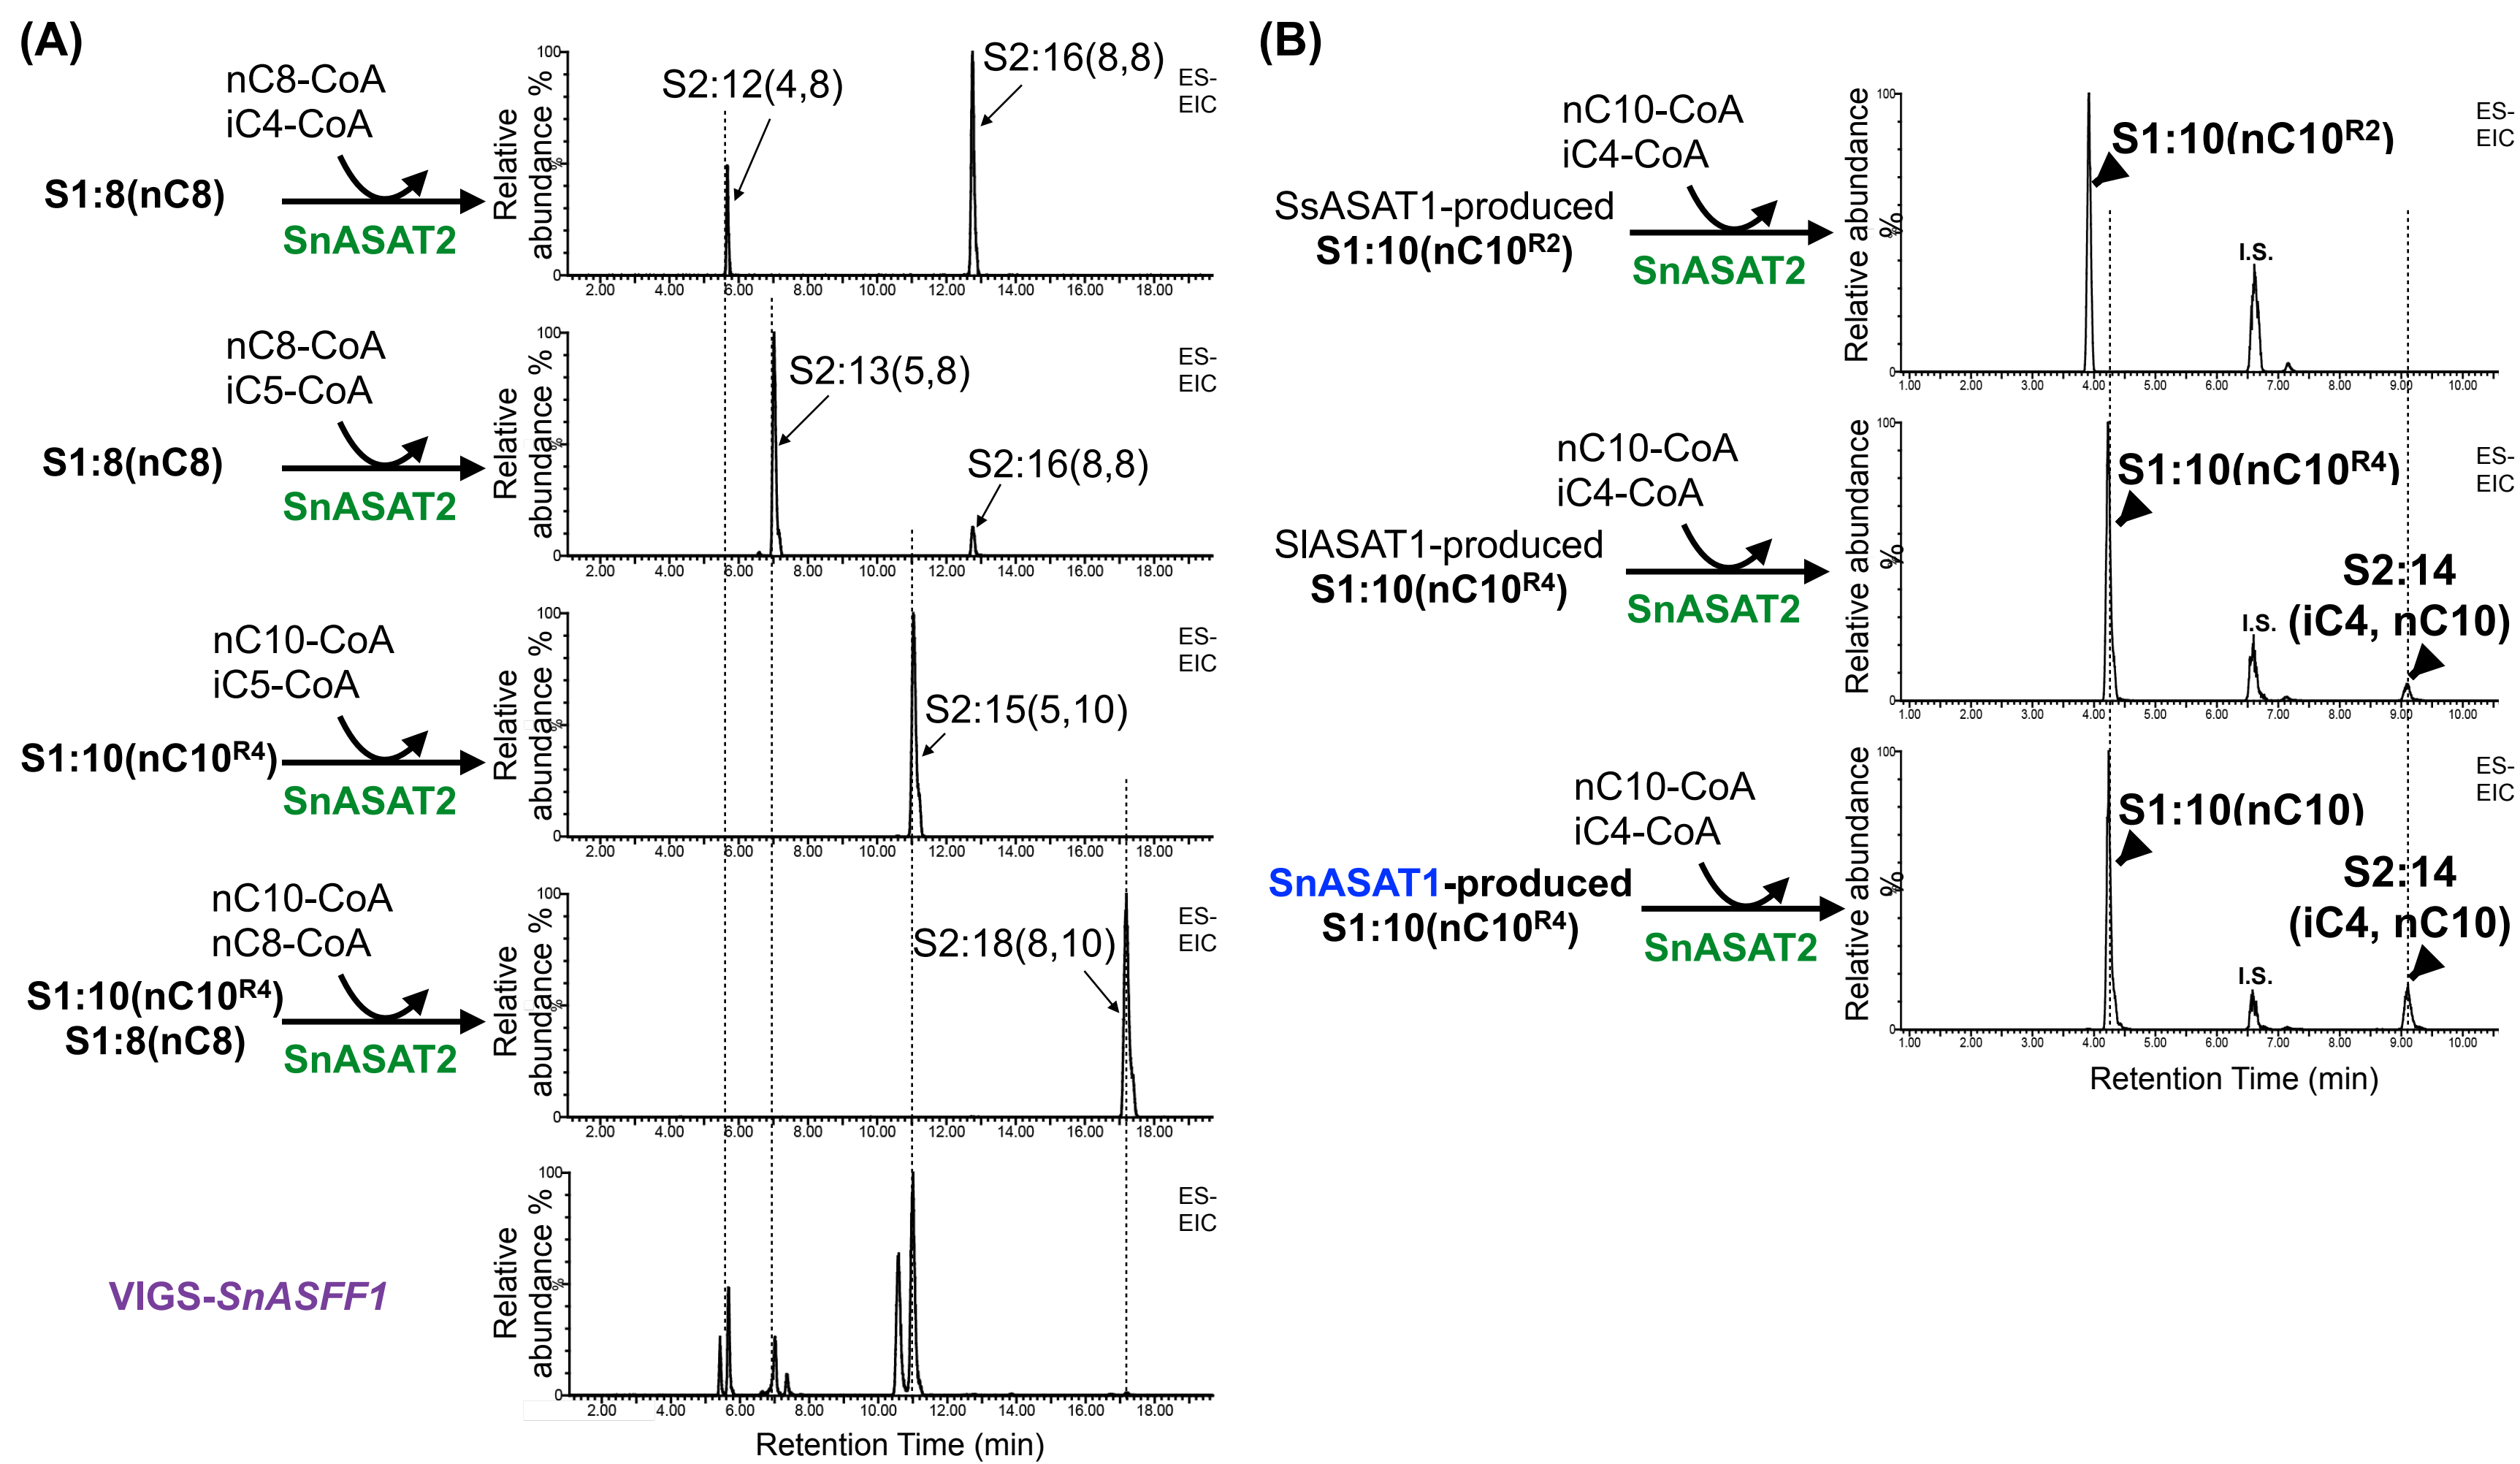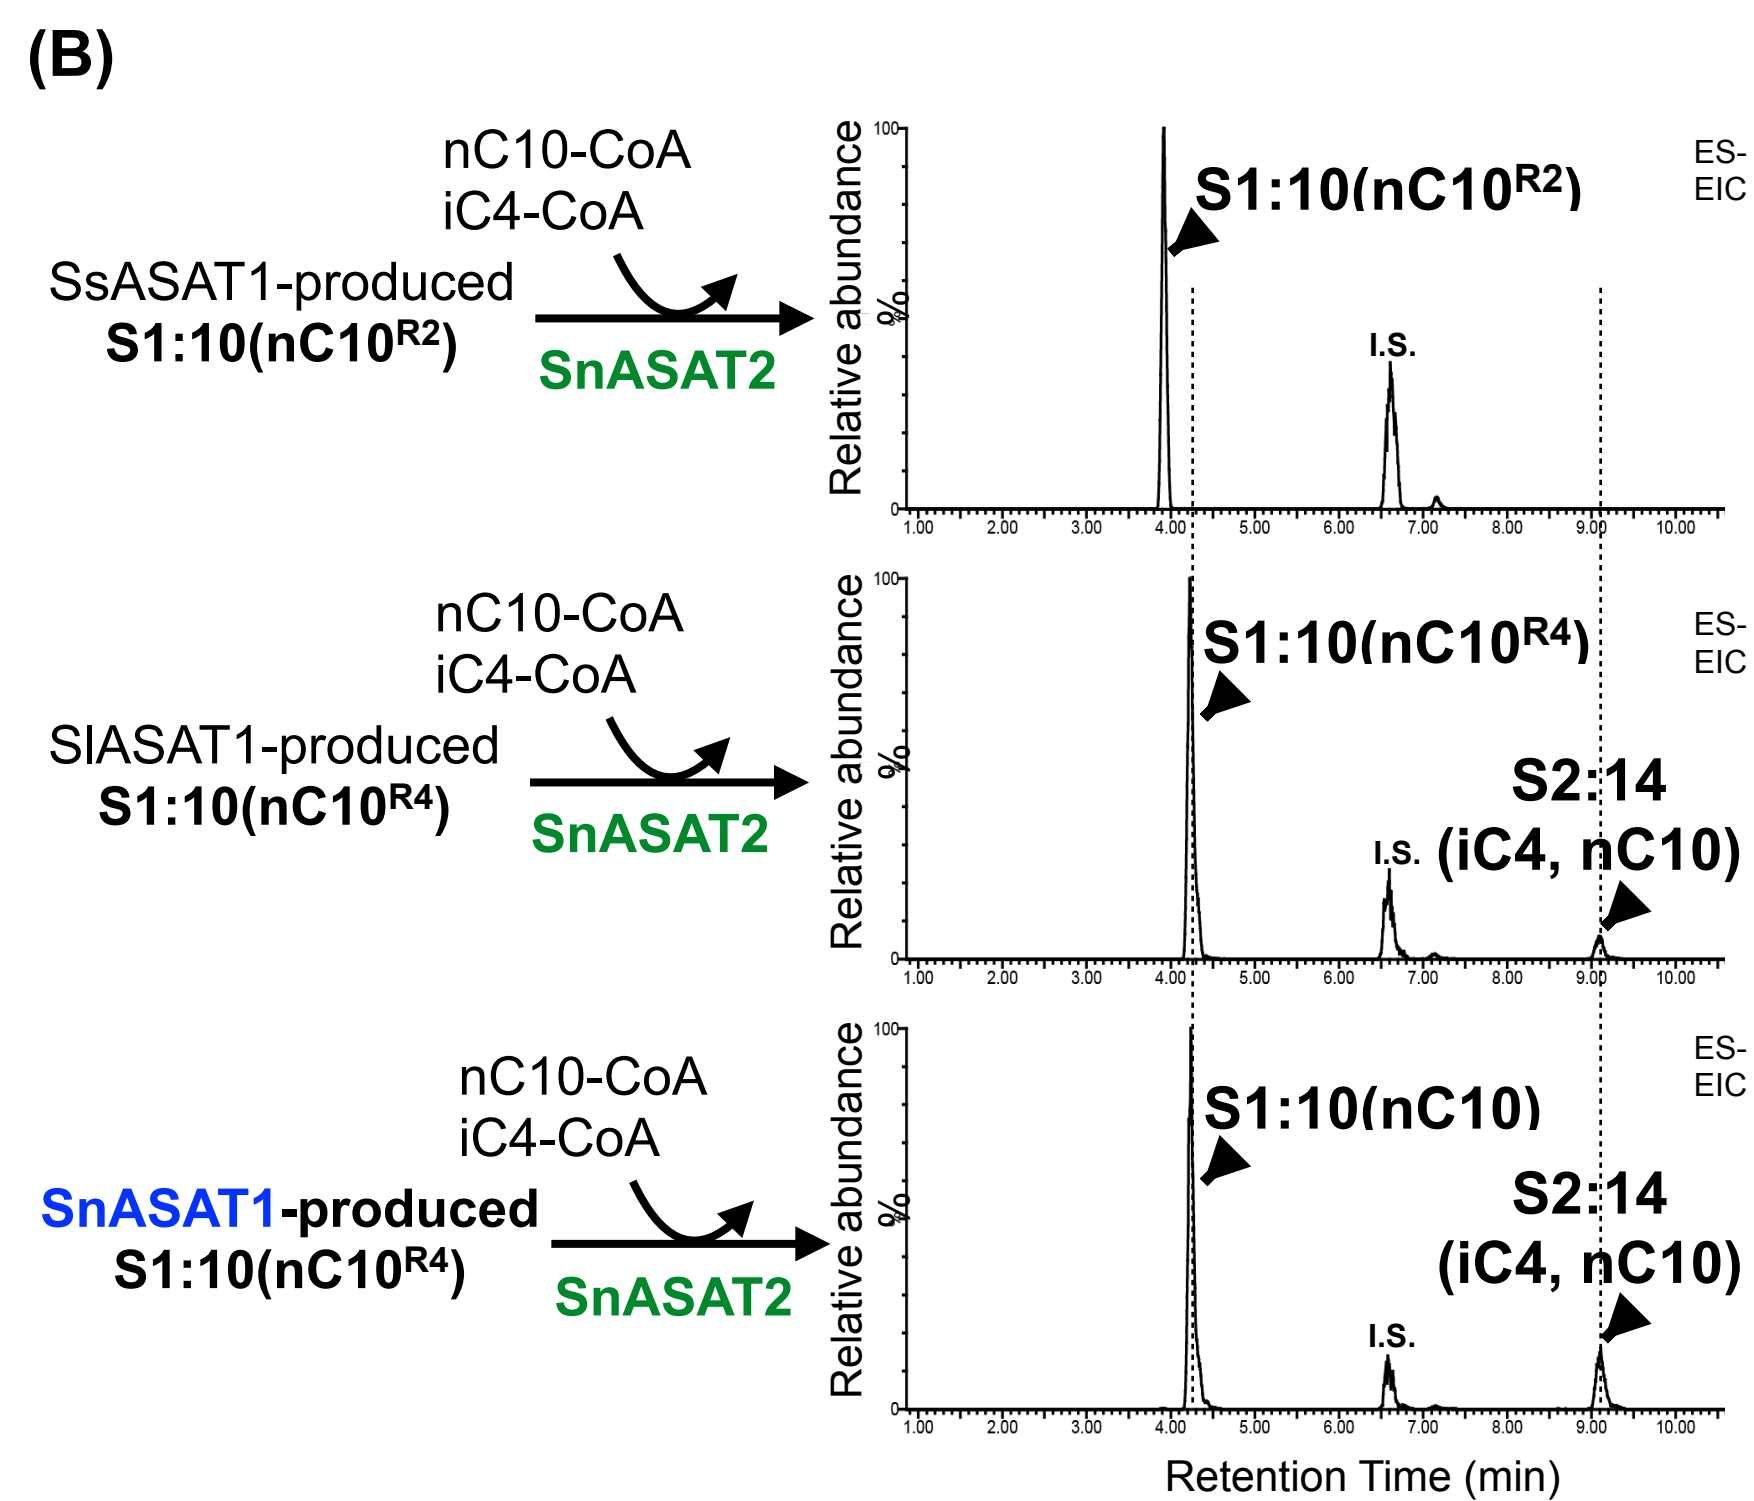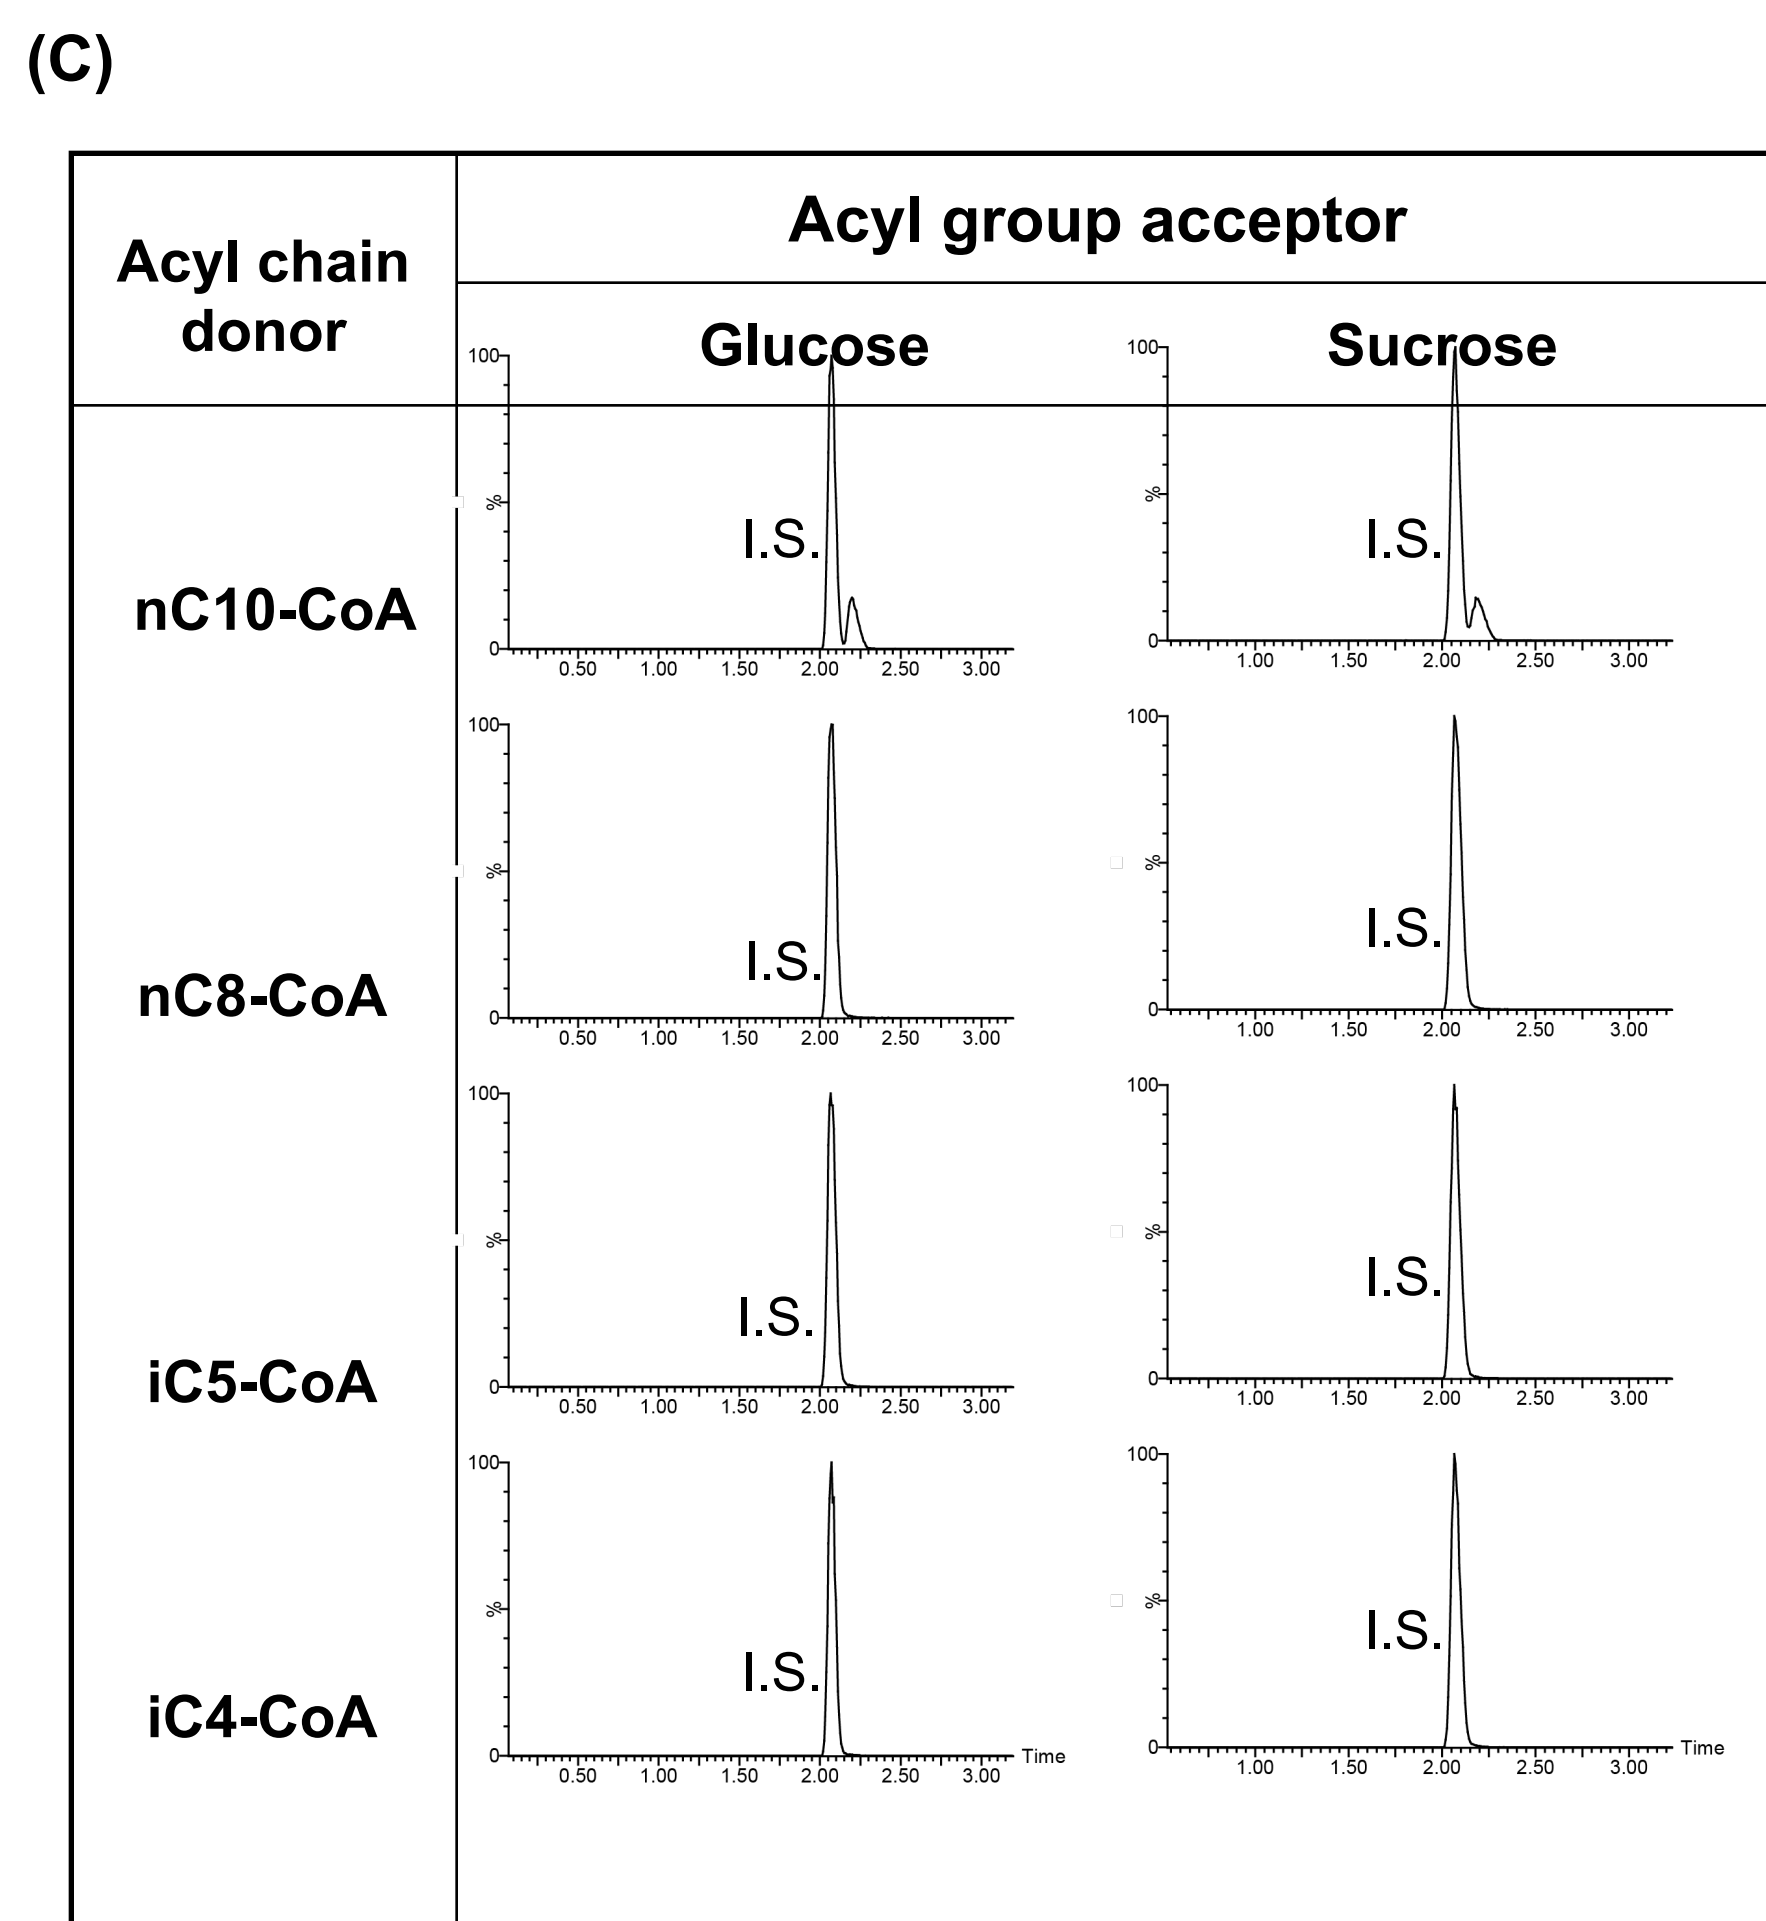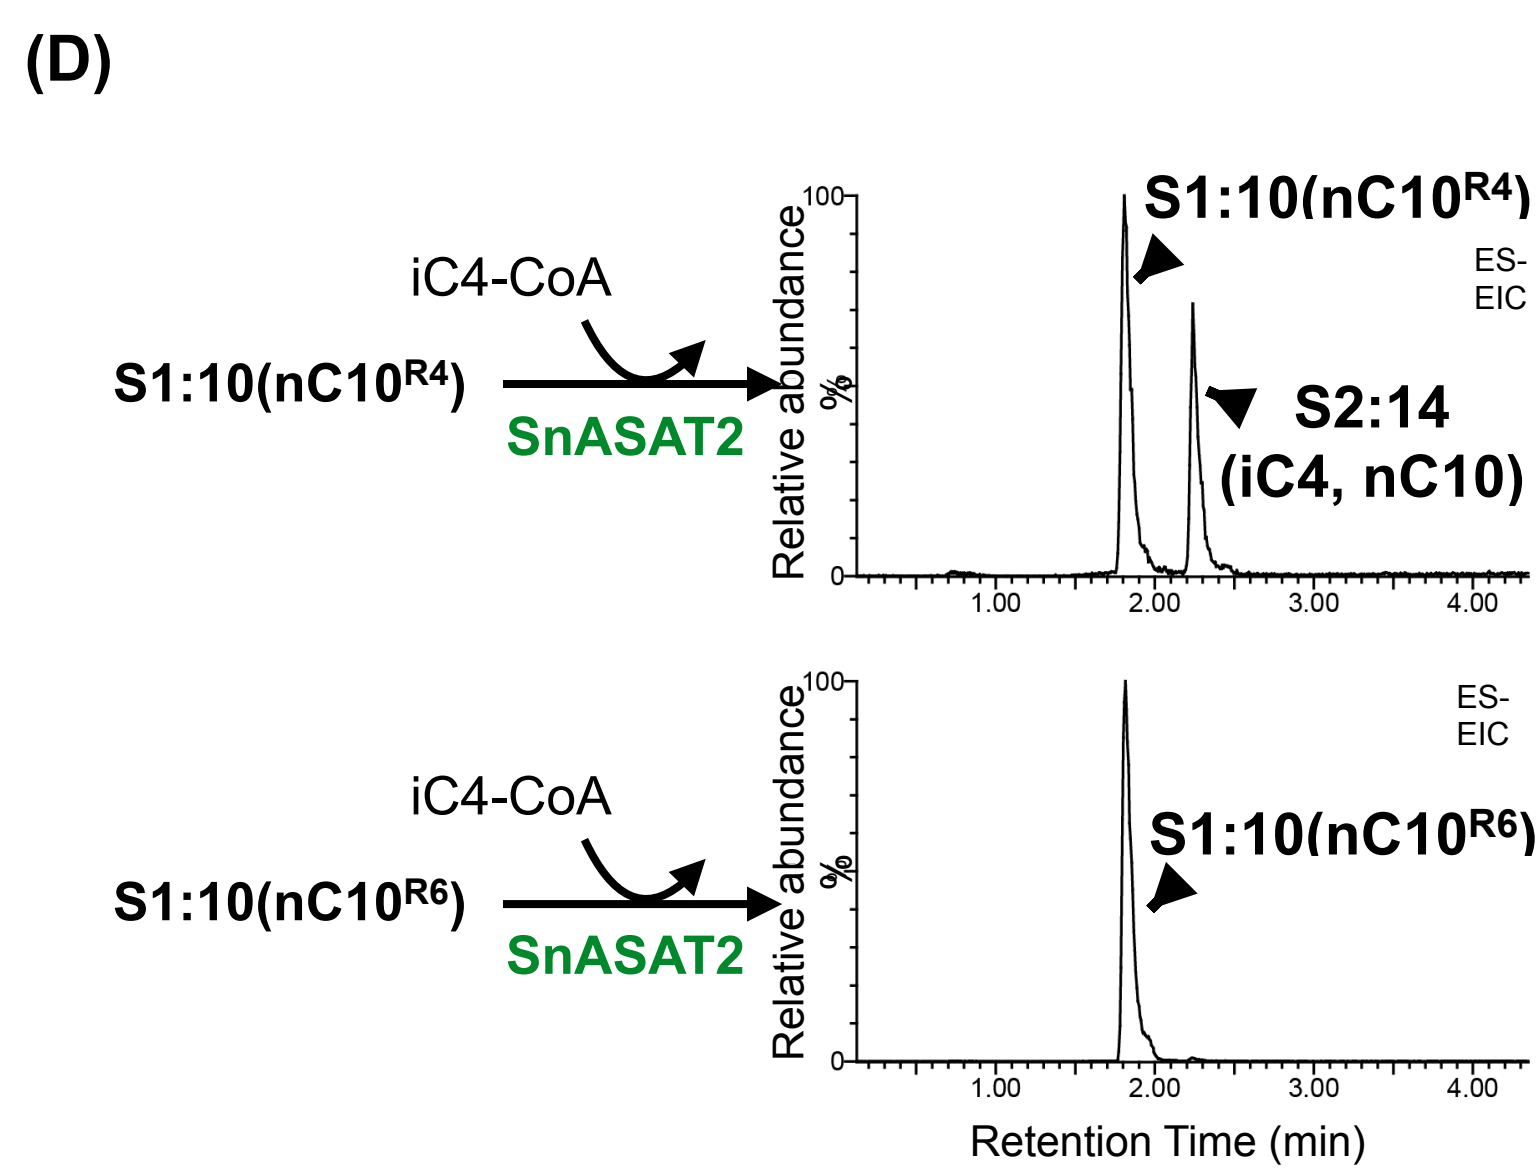

**Fig. S12. SnASAT2 activity with different acyl chain donors and acyl group acceptors.** (A) LC-MS analysis of *in vitro* enzyme assay products indicates SnASAT2 takes SnASAT1-produced monoacylsucroses and iC4-, iC5 and nC8-CoAs as substrates to produce *in vitro* diacylsucroses (top four) that co-elute with *in vivo* diacylsucroses accumulating in VIGS-*SnASFF1* plants (bottom). All acylsugars were analyzed using LC-MS in ESI- mode. Combined extracted ion chromatogram showing enzyme assay products as formate adducts: S2:12 (*m/z* 583.26), S2:13 (*m/z* 597.28), S2:14 (*m/z* 611.29), S2:15 (*m/z* 625.31), S2:16 (*m/z* 639.33), S2:18 (*m/z* 667.36). (B, C, D) LC-MS analysis of *in vitro* enzyme assay products indicates SnASAT2 takes R<sub>4</sub>-acylated S1:10(10) as substrates, but not R<sub>2</sub>- or R<sub>6</sub>-acylated S1:10(10), unmodified glucose or unmodified sucrose. The S1:10 isomers used in panel D were purified from SnASAT1 enzyme assays and verified by NMR (Fig. S7D). All acylsugars were analyzed using LC-MS in ESI- mode. Combined extracted ion chromatogram showing internal standard telmisartan (*m/z* 513.23) and formate adducts of S1:10 (*m/z* 541.25) and S2:14 (*m/z* 611.29) in panel B and D, and S1:10 (*m/z* 541.25), G1:10 (*m/z* 379.21), S1:8 (*m/z* 513.22), G1:8 (*m/z* 351.17), S1:5 (*m/z* 471.18), G1:5 (*m/z* 309.12), S1:4 (*m/z* 457.16) and G1:4 (*m/z* 295.11) in panel C.



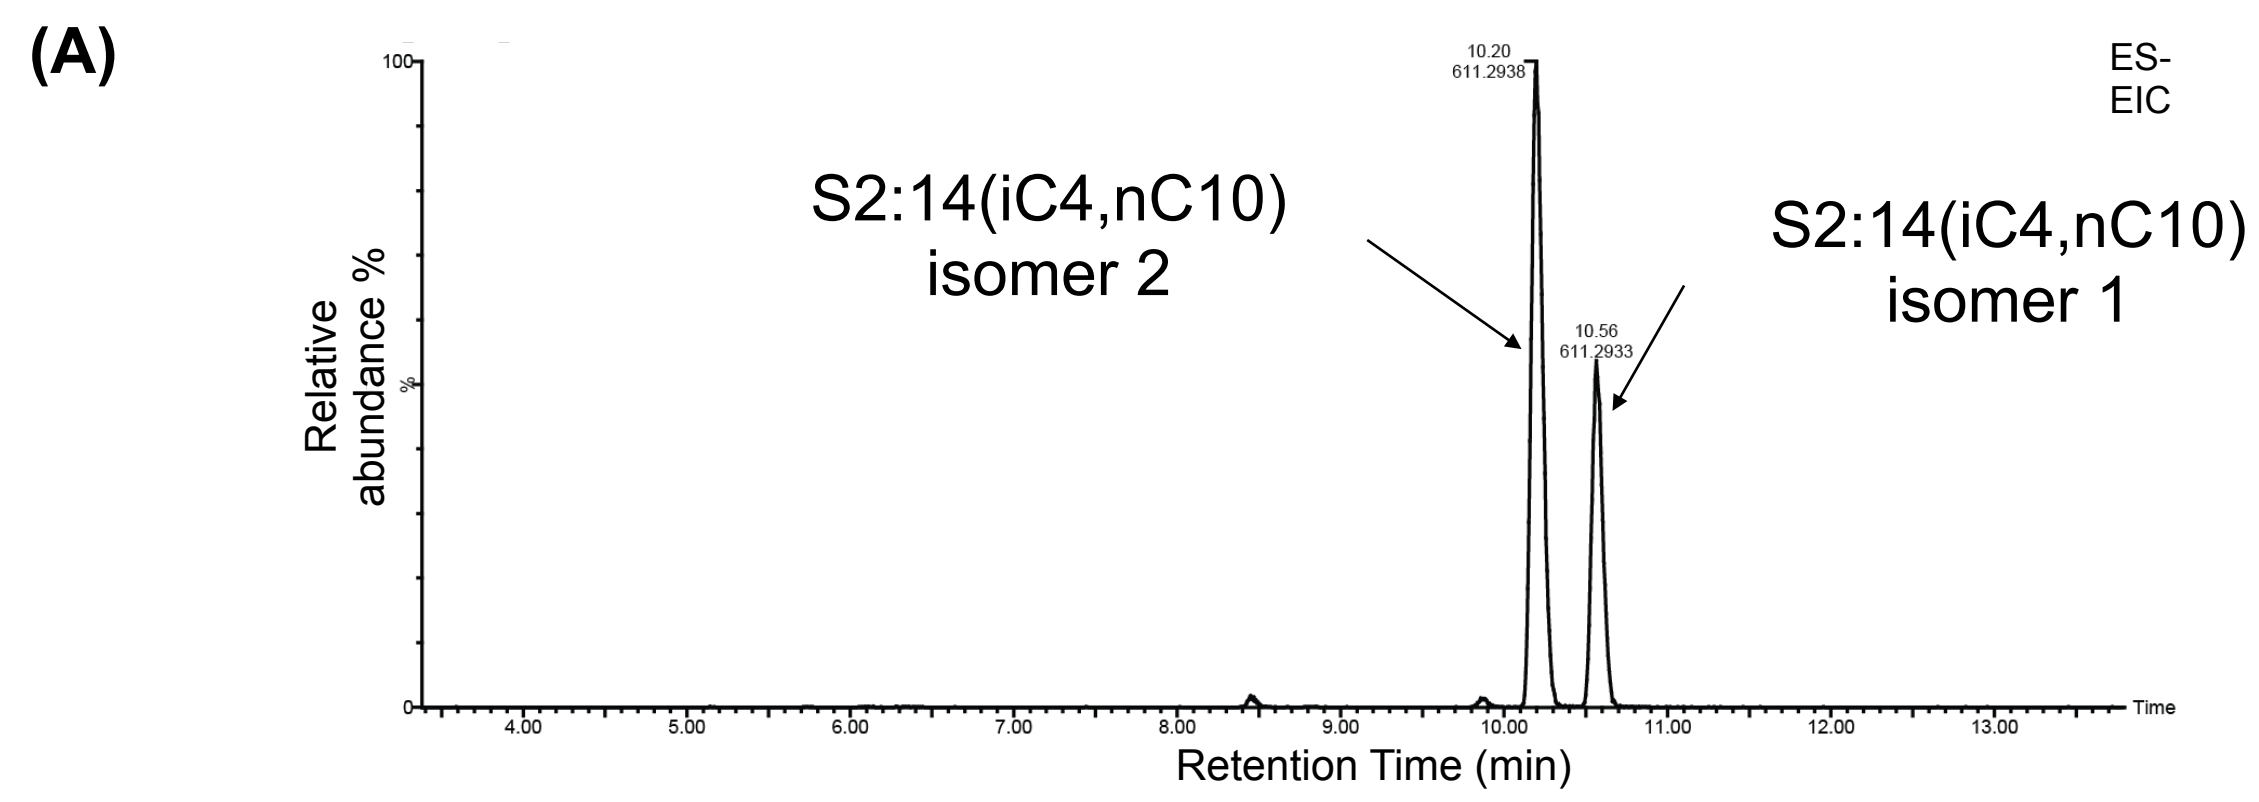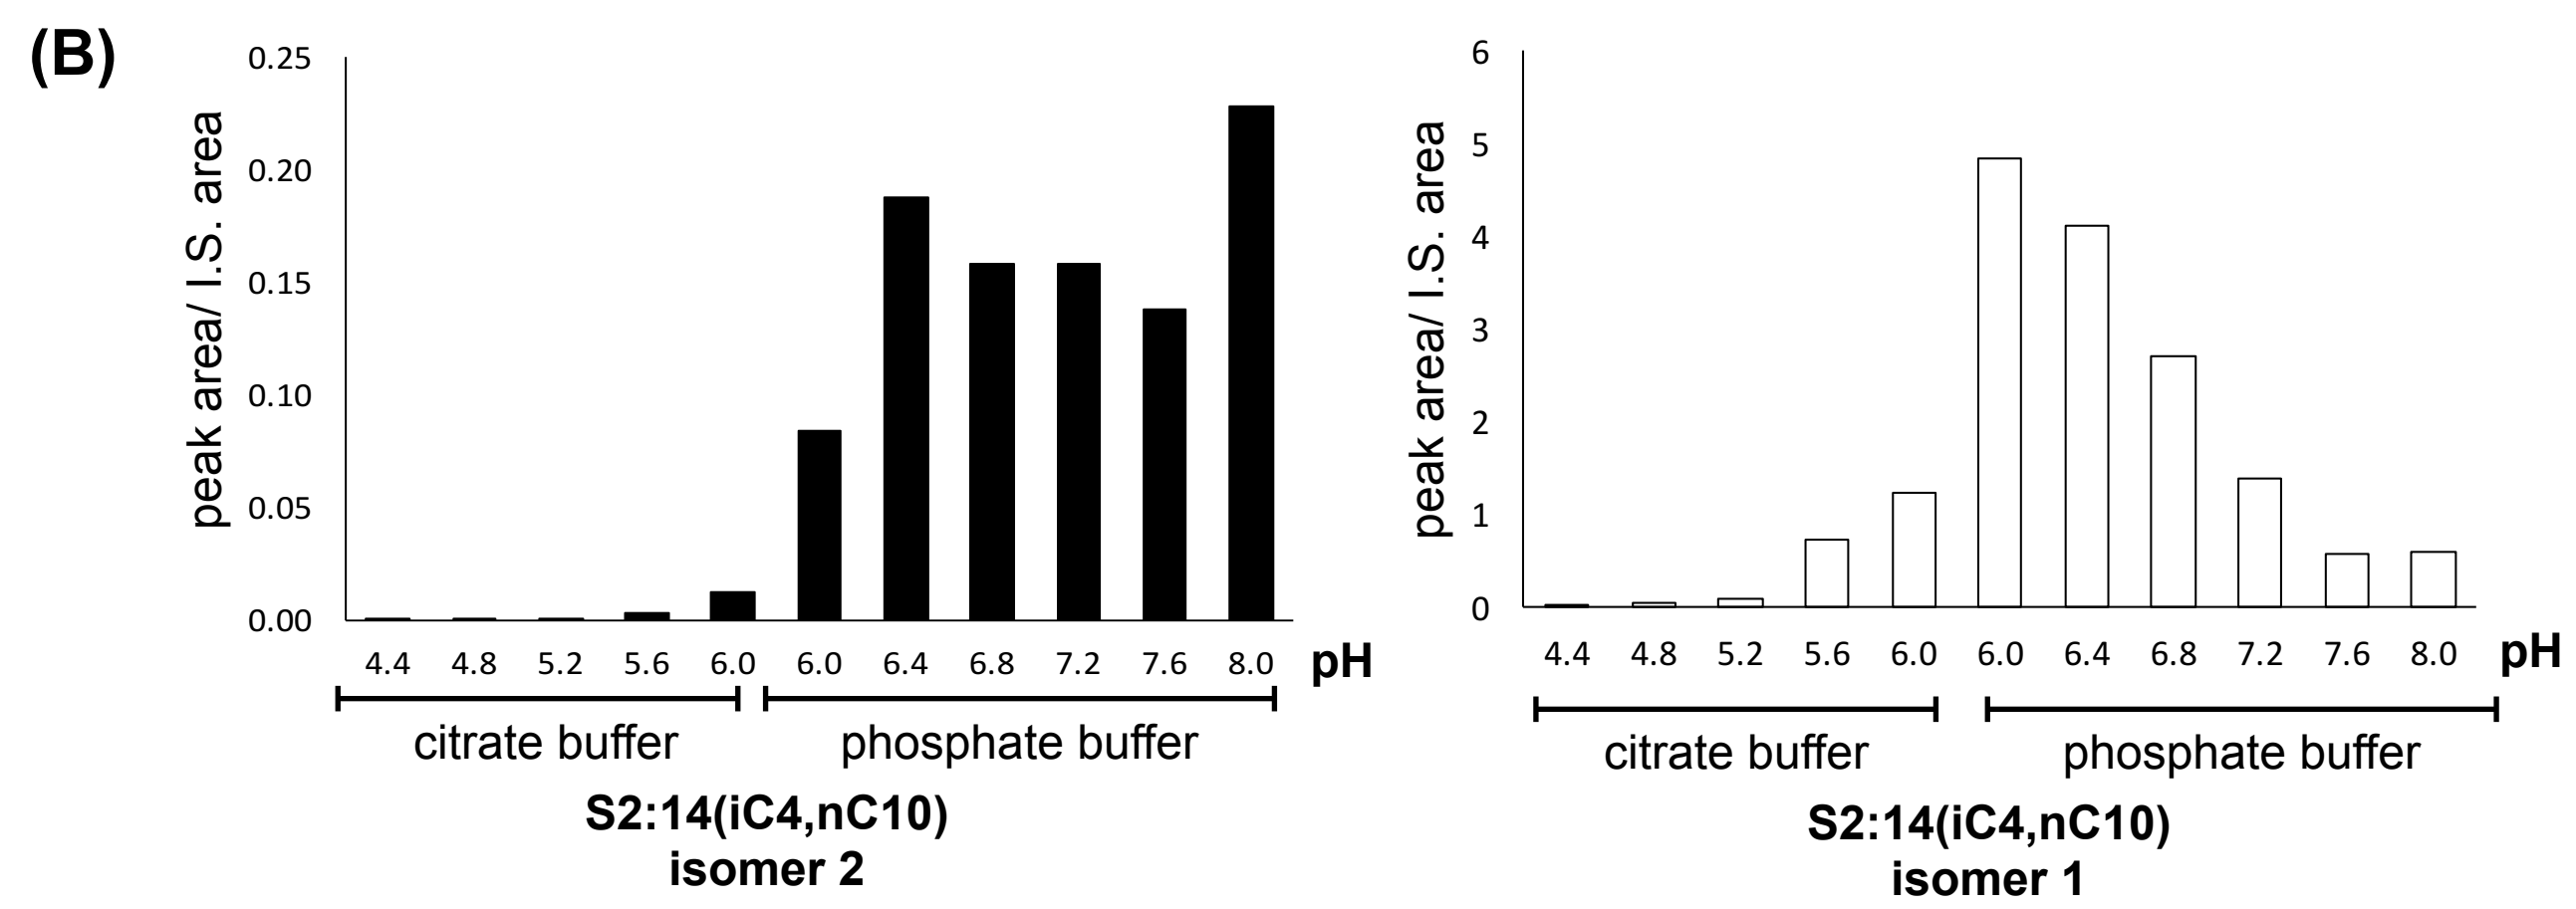

**Fig. S13. A second S2:14 isomer accumulates in SnASAT2 enzyme assays. (A)** LC-MS analysis of SnASAT2 *in vitro* assay products showed a second isomer (isomer 2) accumulating in unbuffered water based solution for 120 min. **(B)** The concentration of the second isomer increases when enzyme assays were carried out in neutral-to-alkaline pH conditions. Acylsugars were analyzed using LC-MS in ESI- mode. Extracted ion chromatogram showing formate adducts of S2:14 (*m/z* 611.29). Peak areas of S2:14 were integrated under negative mode and normalized to the internal standard telmisartan.

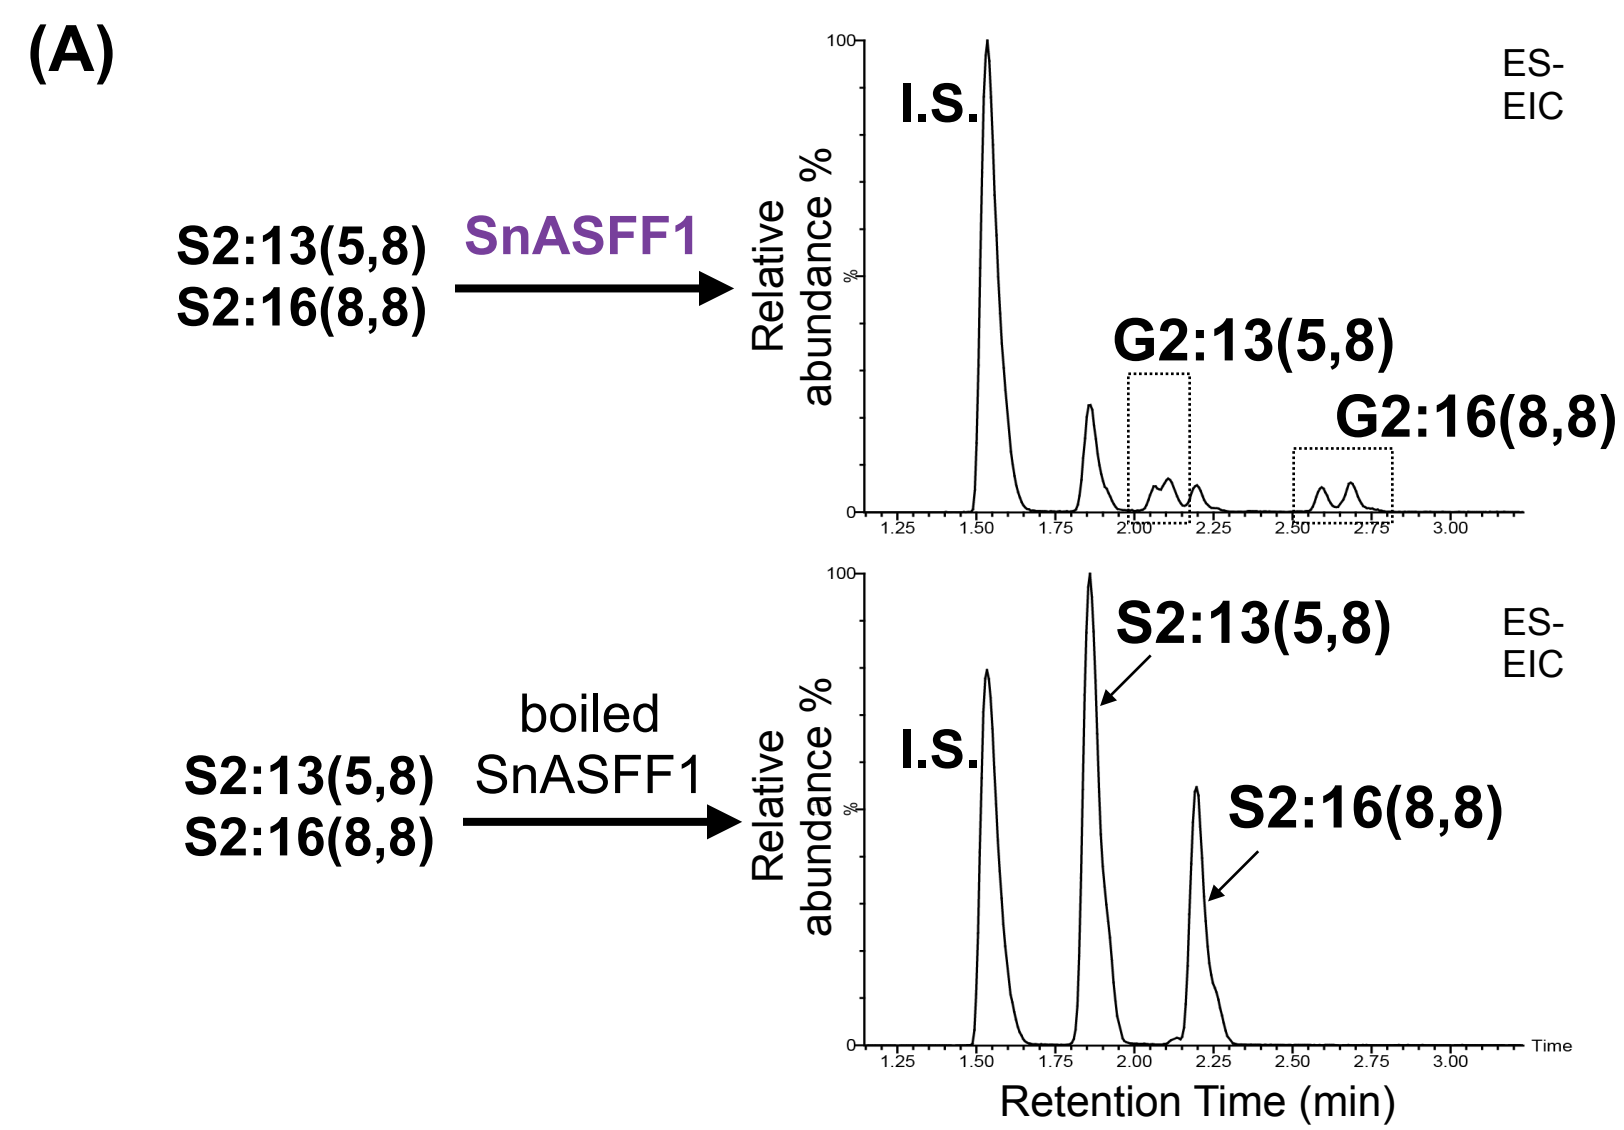

**(B) G2:14(iC4, nC10) ( $m/z$  449.24 in ESI-) from  
SnASAT1+SnASAT2+SnASFF1 *in vitro* assay**

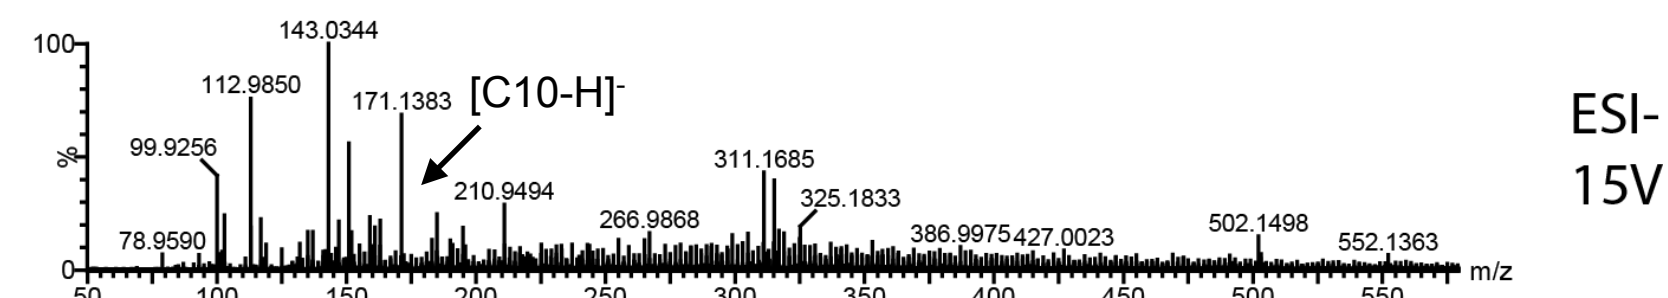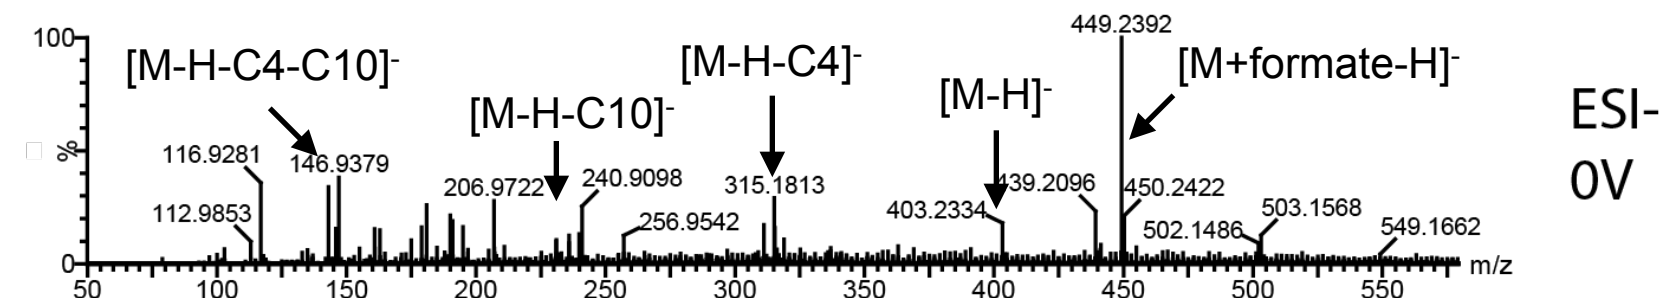

**G2:14(4,10) ( $m/z$  449.24 in ESI-) from  
late-eluting *in vivo* S2:14(4,10)+SnASFF1 *in vitro* assay**

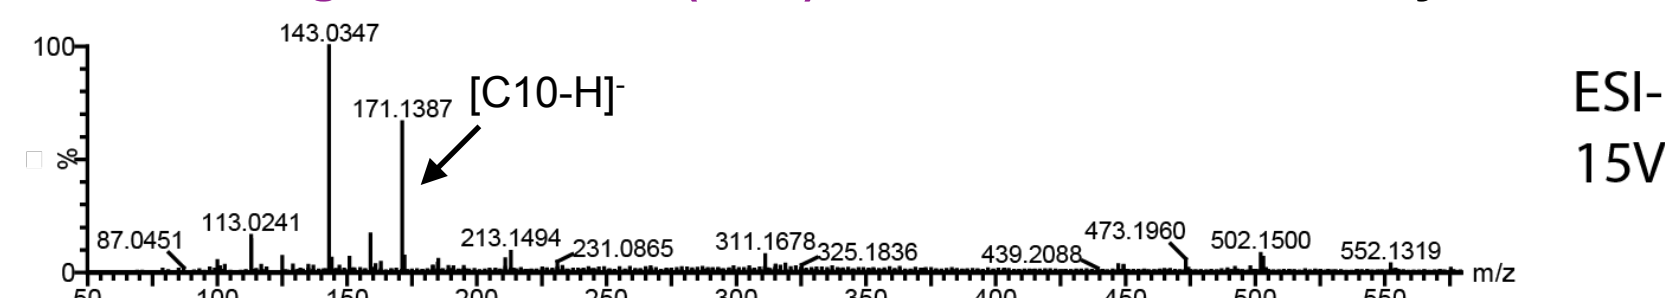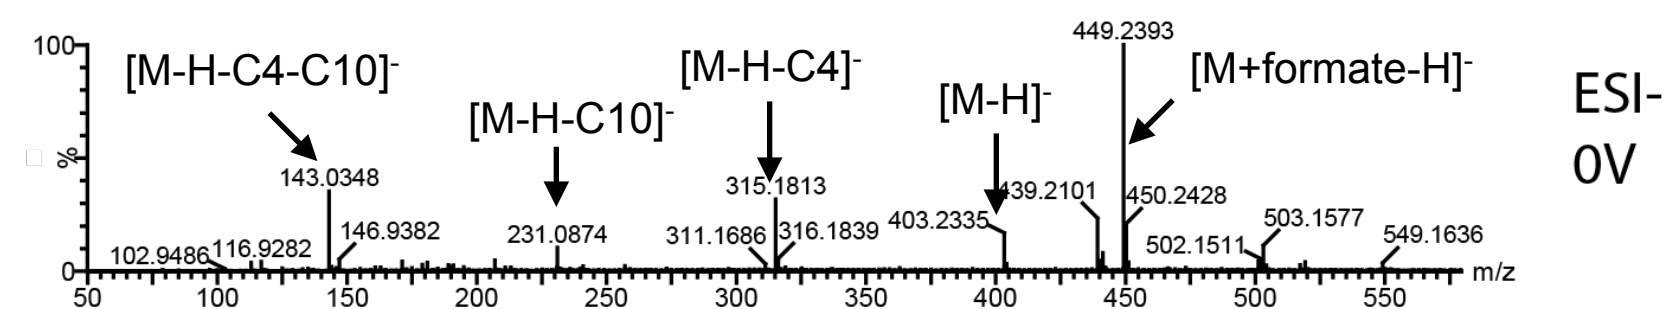

**G2:14(4,10) ( $m/z$  449.24 in ESI-) from  
early-eluting *in vivo* S2:14(4,10)+SnASFF1 *in vitro* assay**

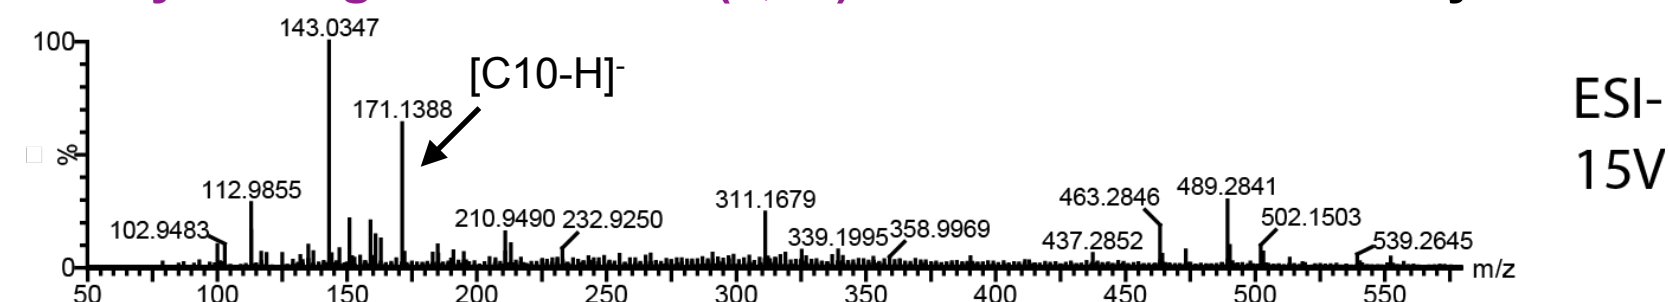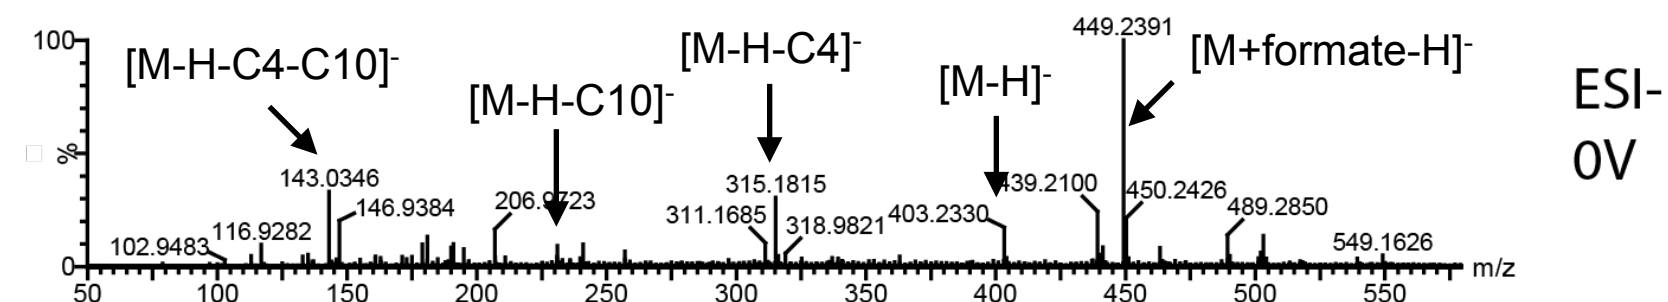

**Fig. S14. *In vitro* validation of involvement of SnASFF1 in *S. nigrum* acylglucose biosynthesis.** (A) ESI- mode LC-MS analysis of *in vitro* enzyme assay products indicates SnASFF1 hydrolyzes S2:13(5,8) and S2:16(8,8) to produce G2:13(5,8) and S2:16(8,8). (B) The G2:14 isomers produced from *in vitro* (top) and *in vivo* (bottom two) S2:14 isomers generate comparable mass spectra that reveals the loss of C4 and C10 ketenes under no collision energy (0V) and the presence of C10 fatty acid anions ( $m/z$  171.14) at elevated collision energy (15V).

**(A)**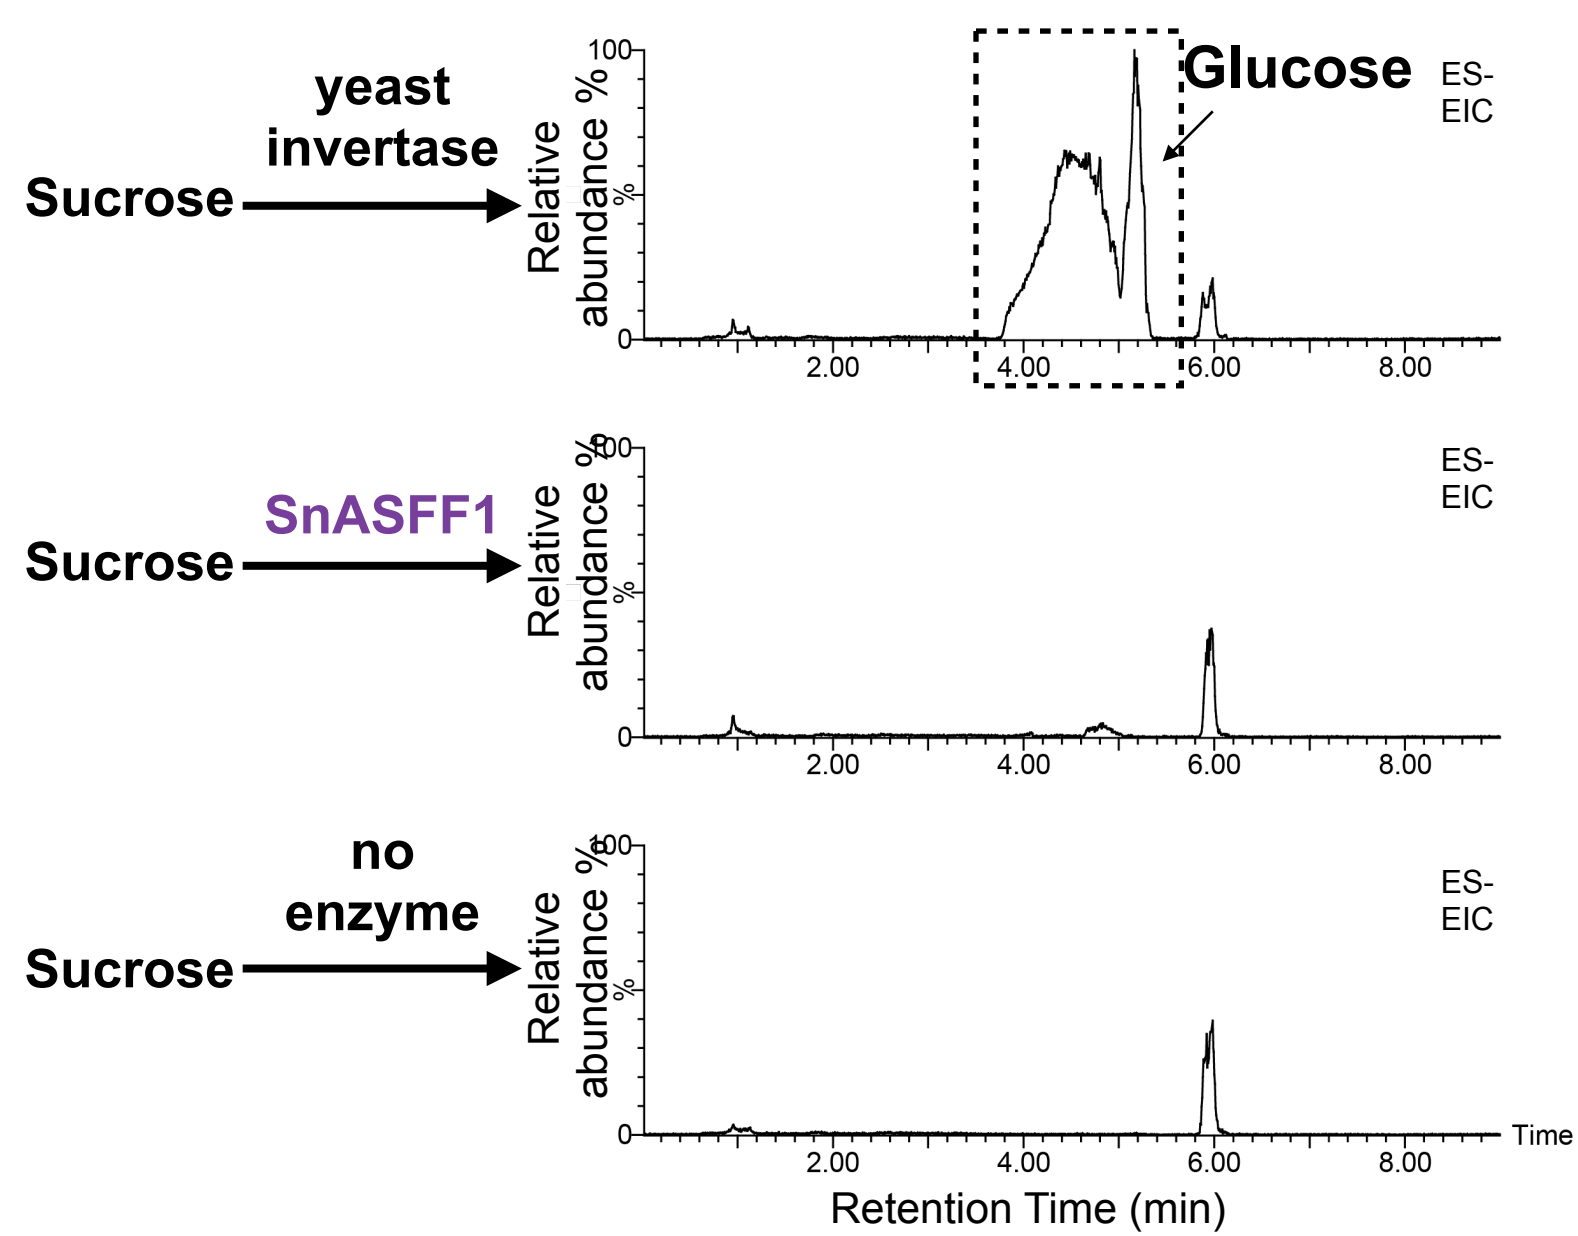**(C)**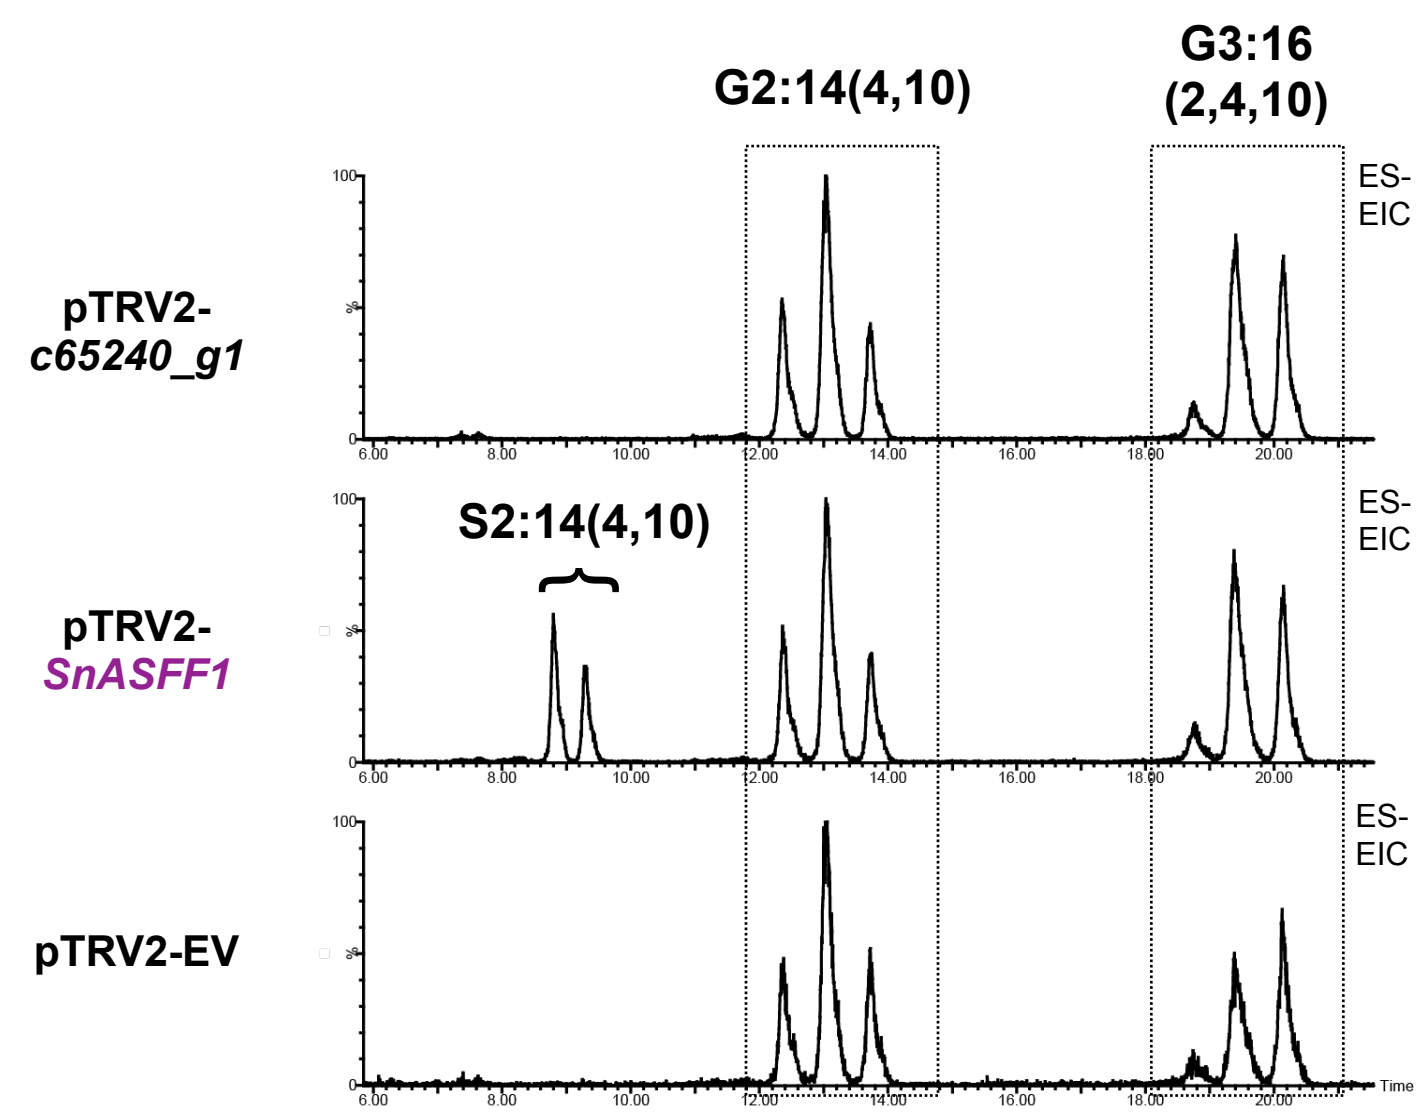**(B)**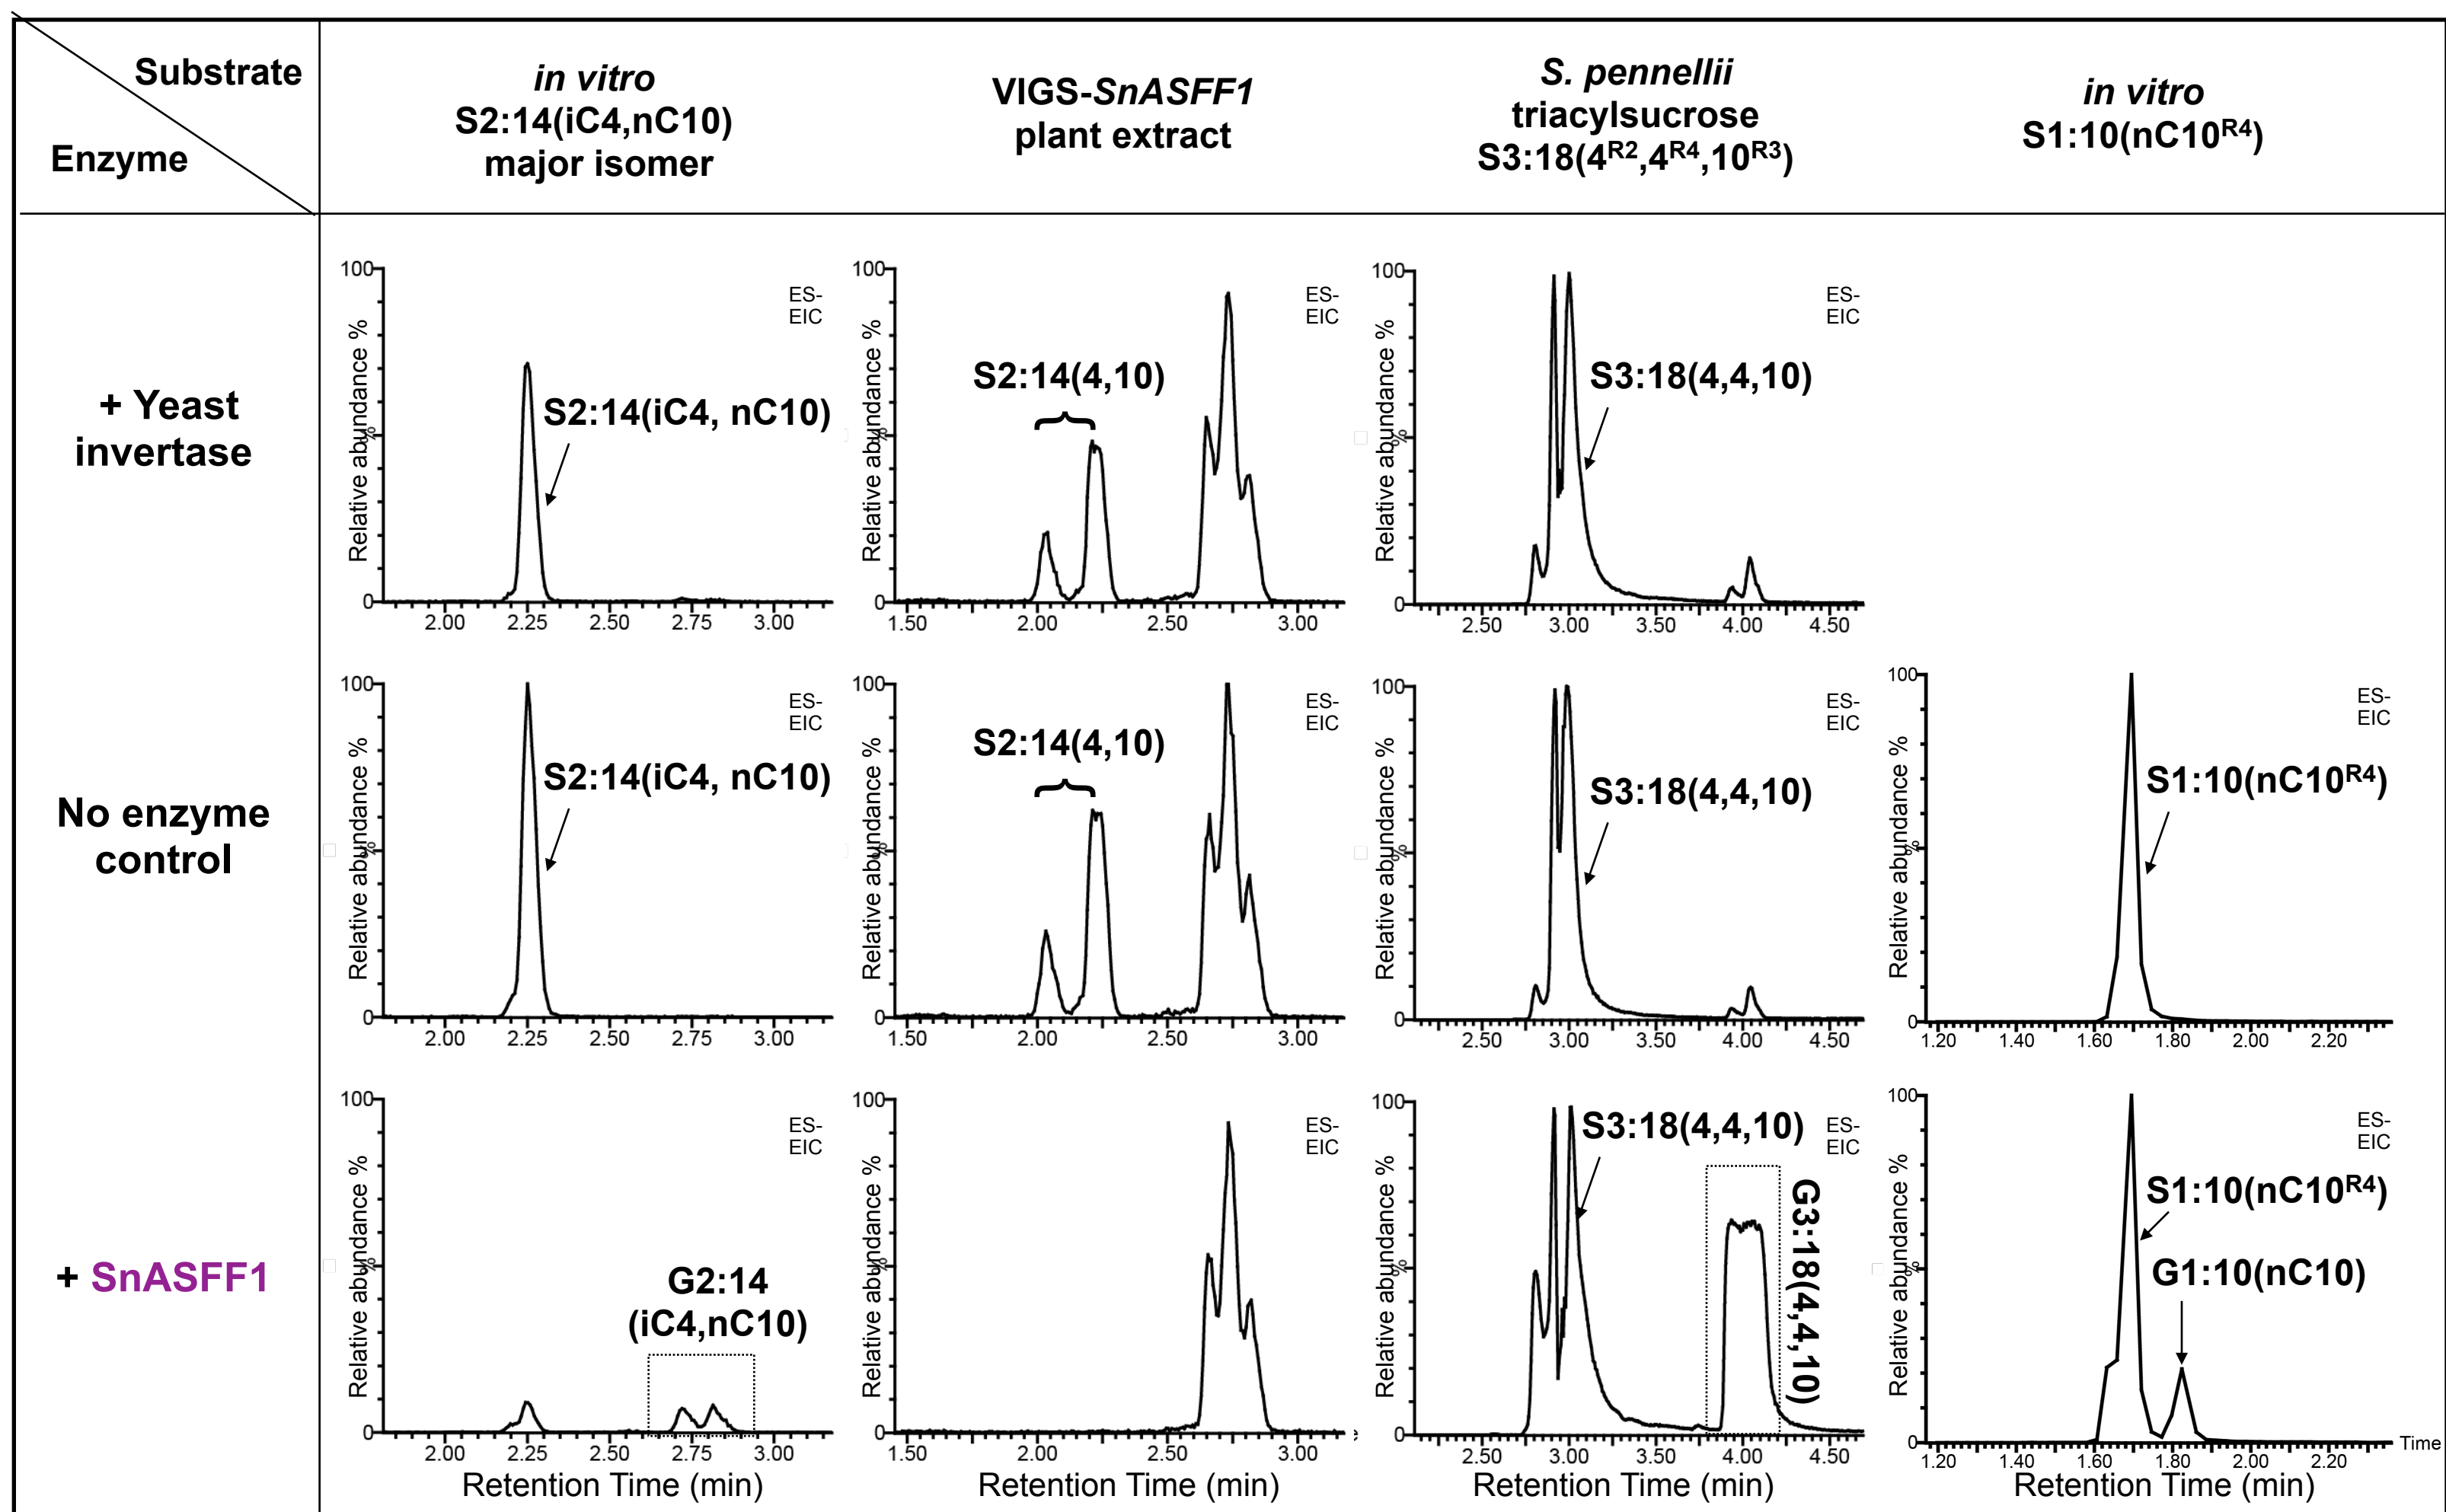



**Fig. S15. SnASFF1 cleaves mono-, di- and triacylated sucroses but not unmodified sucrose while yeast invertase cleaves unmodified sucrose but not acylsucroses.** (A) LC-MS analysis of *in vitro* assays with unacylated sucrose showing abundant glucose accumulating in enzyme assay with yeast invertase (top) but not with SnASFF1 (middle). Extracted ion chromatogram (ESI-) showing glucose products ( $m/z$  179.06). (B) Representative LC-MS of *SnASFF1*-targeted, *c65240\_g1*-targeted and empty vector VIGS plants showing diacylsucrose accumulation in VIGS-*SnASFF1* but not in VIGS-*c65240\_g1* plants. Combined extracted ion chromatogram showing formate adducts of S2:14 ( $m/z$  611.29), G2:14 ( $m/z$  445.26) and G3:16 ( $m/z$  491.25). (B) ESI- mode LC-MS analysis of *in vitro* enzyme assay products indicates that SnASFF1 hydrolyzes *in vitro* and *in vivo* diacylsucrose S2:14(4,10), R<sub>4</sub>-acylated monoacylsucrose S1:10 and R<sub>2</sub>, R<sub>3</sub>, R<sub>4</sub>-acylated triacylsucrose S3:18(4<sup>R2</sup>,4<sup>R4</sup>,10<sup>R3</sup>) purified from *S. pennellii*. Chemical structure of S3:18(4<sup>R2</sup>,4<sup>R4</sup>,10<sup>R3</sup>) was verified by NMR<sup>3</sup>. Combined extracted ion chromatogram showing formate adducts of substrates and products: column 1 and 2, S2:14 ( $m/z$  611.29) and G2:14 ( $m/z$  445.26), column 3, S3:18 ( $m/z$  654.37) and G3:18 ( $m/z$  492.31), column 4, S1:10 ( $m/z$  541.25) and G1:10 ( $m/z$  379.2). Combined extracted ion chromatogram showing formate adducts of S2:14 ( $m/z$  611.29), G2:14 ( $m/z$  445.26) and G3:16 ( $m/z$  491.25).

(A)

G3:16(2,iC4,nC10) ( $m/z$  491.25 in ESI-) from  
SnASAT1+SnASAT2+SnASFF1+SnAGAT1 *in vitro* assay

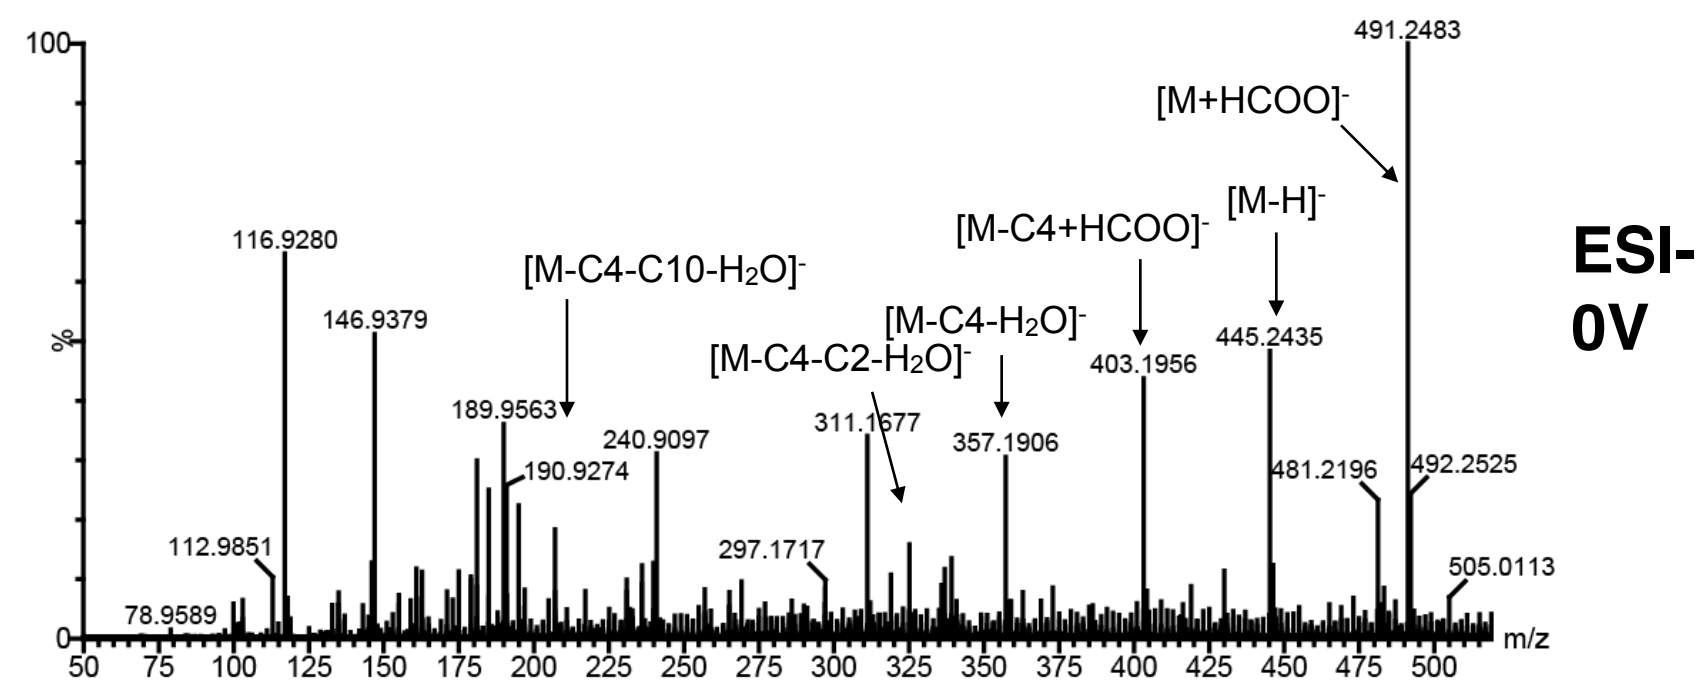

G3:16(2,4,10) ( $m/z$  491.25 in ESI-) from  
late-eluting *in vivo* S2:14(4,10)+SnASFF1+SnAGAT1 *in vitro* assay

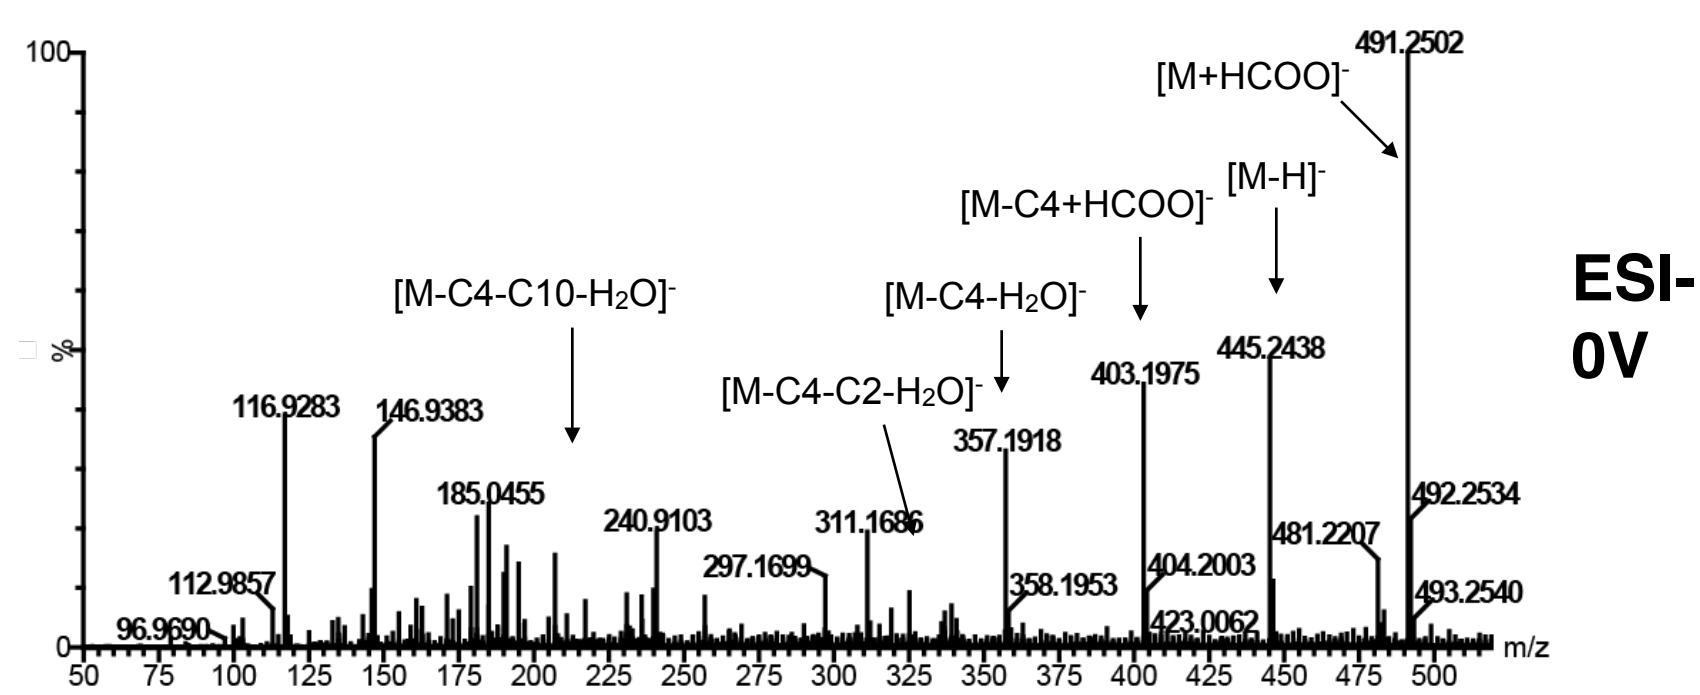

G3:16(2,4,10) ( $m/z$  491.25 in ESI-) from  
early-eluting *in vivo* S2:14(4,10)+SnASFF1+SnAGAT1 *in vitro* assay

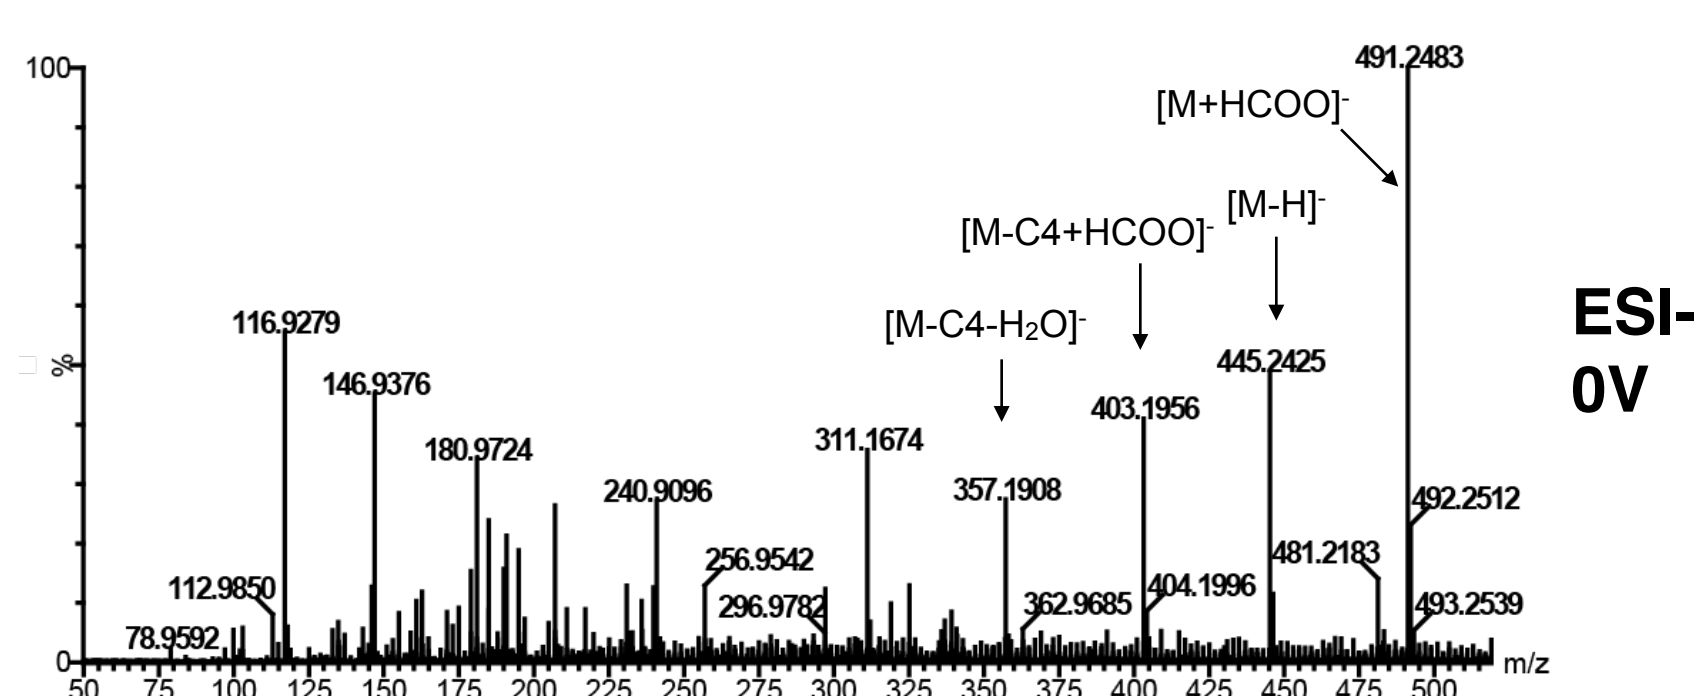

(B)

G2:12(4,8) ( $m/z$  421.21 in ESI-) from  
S. nigrum frac 1 + SnAGAT1 *in vitro* assay

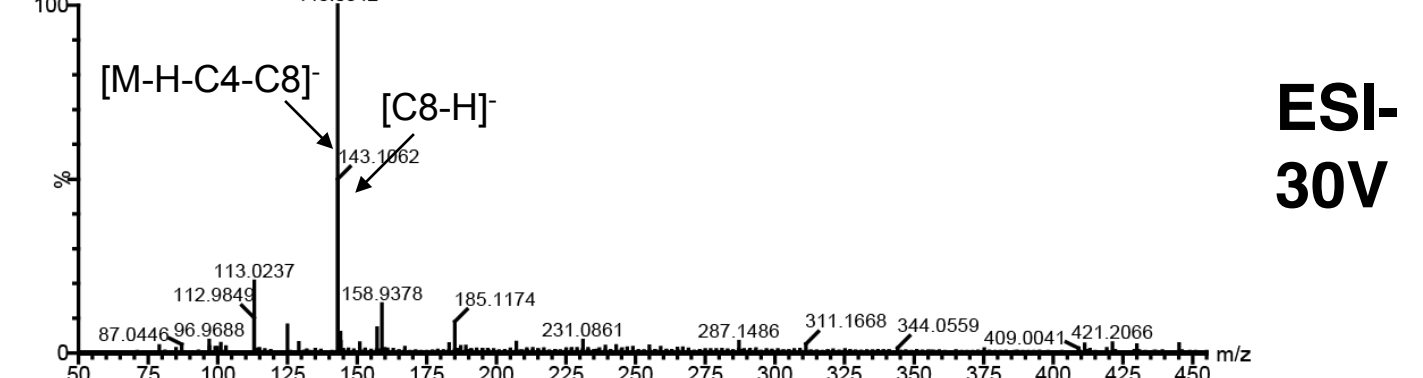

G2:13(4,9) ( $m/z$  435.22 in ESI-) from  
S. nigrum frac 1 + SnAGAT1 *in vitro* assay

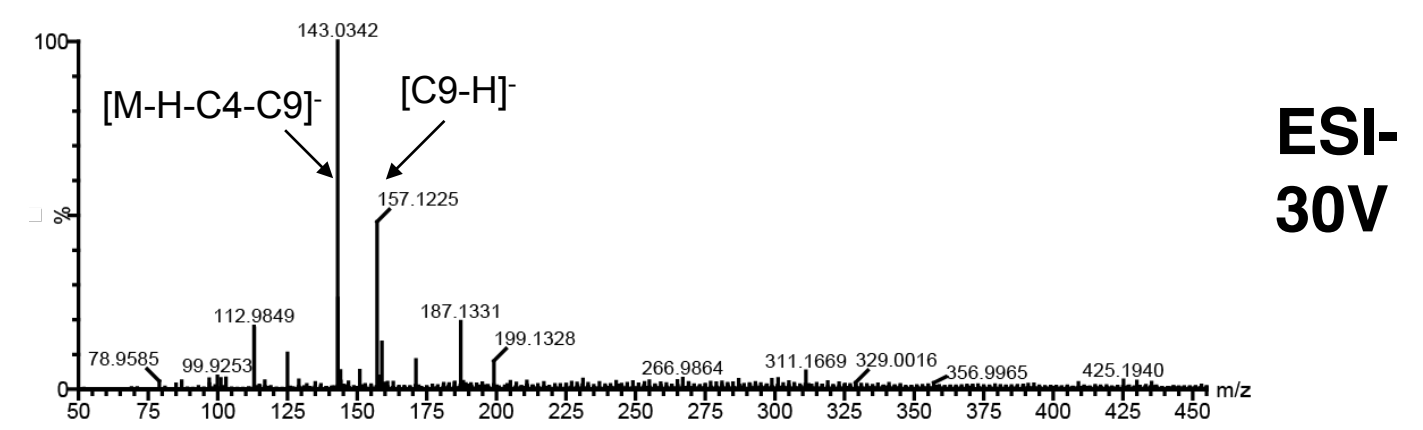

G2:14(4,10) ( $m/z$  449.24 in ESI-) from  
S. nigrum frac 1 + SnAGAT1 *in vitro* assay

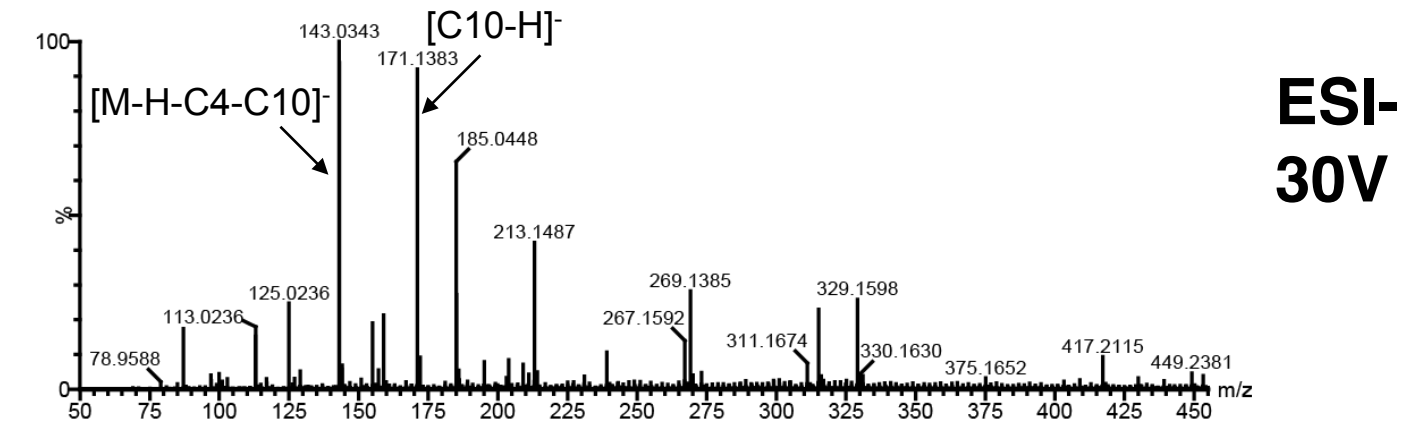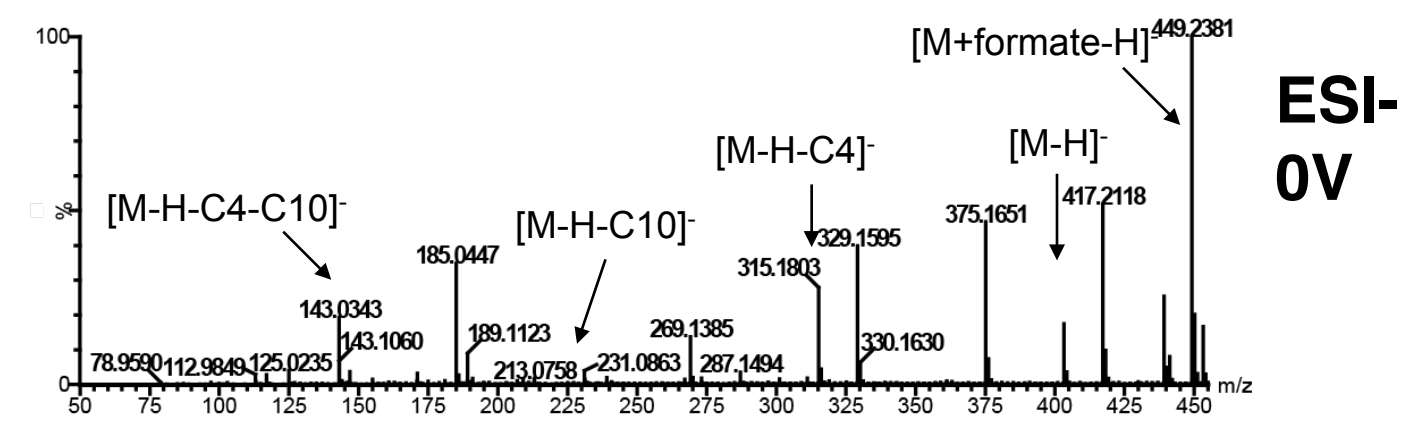

(C)

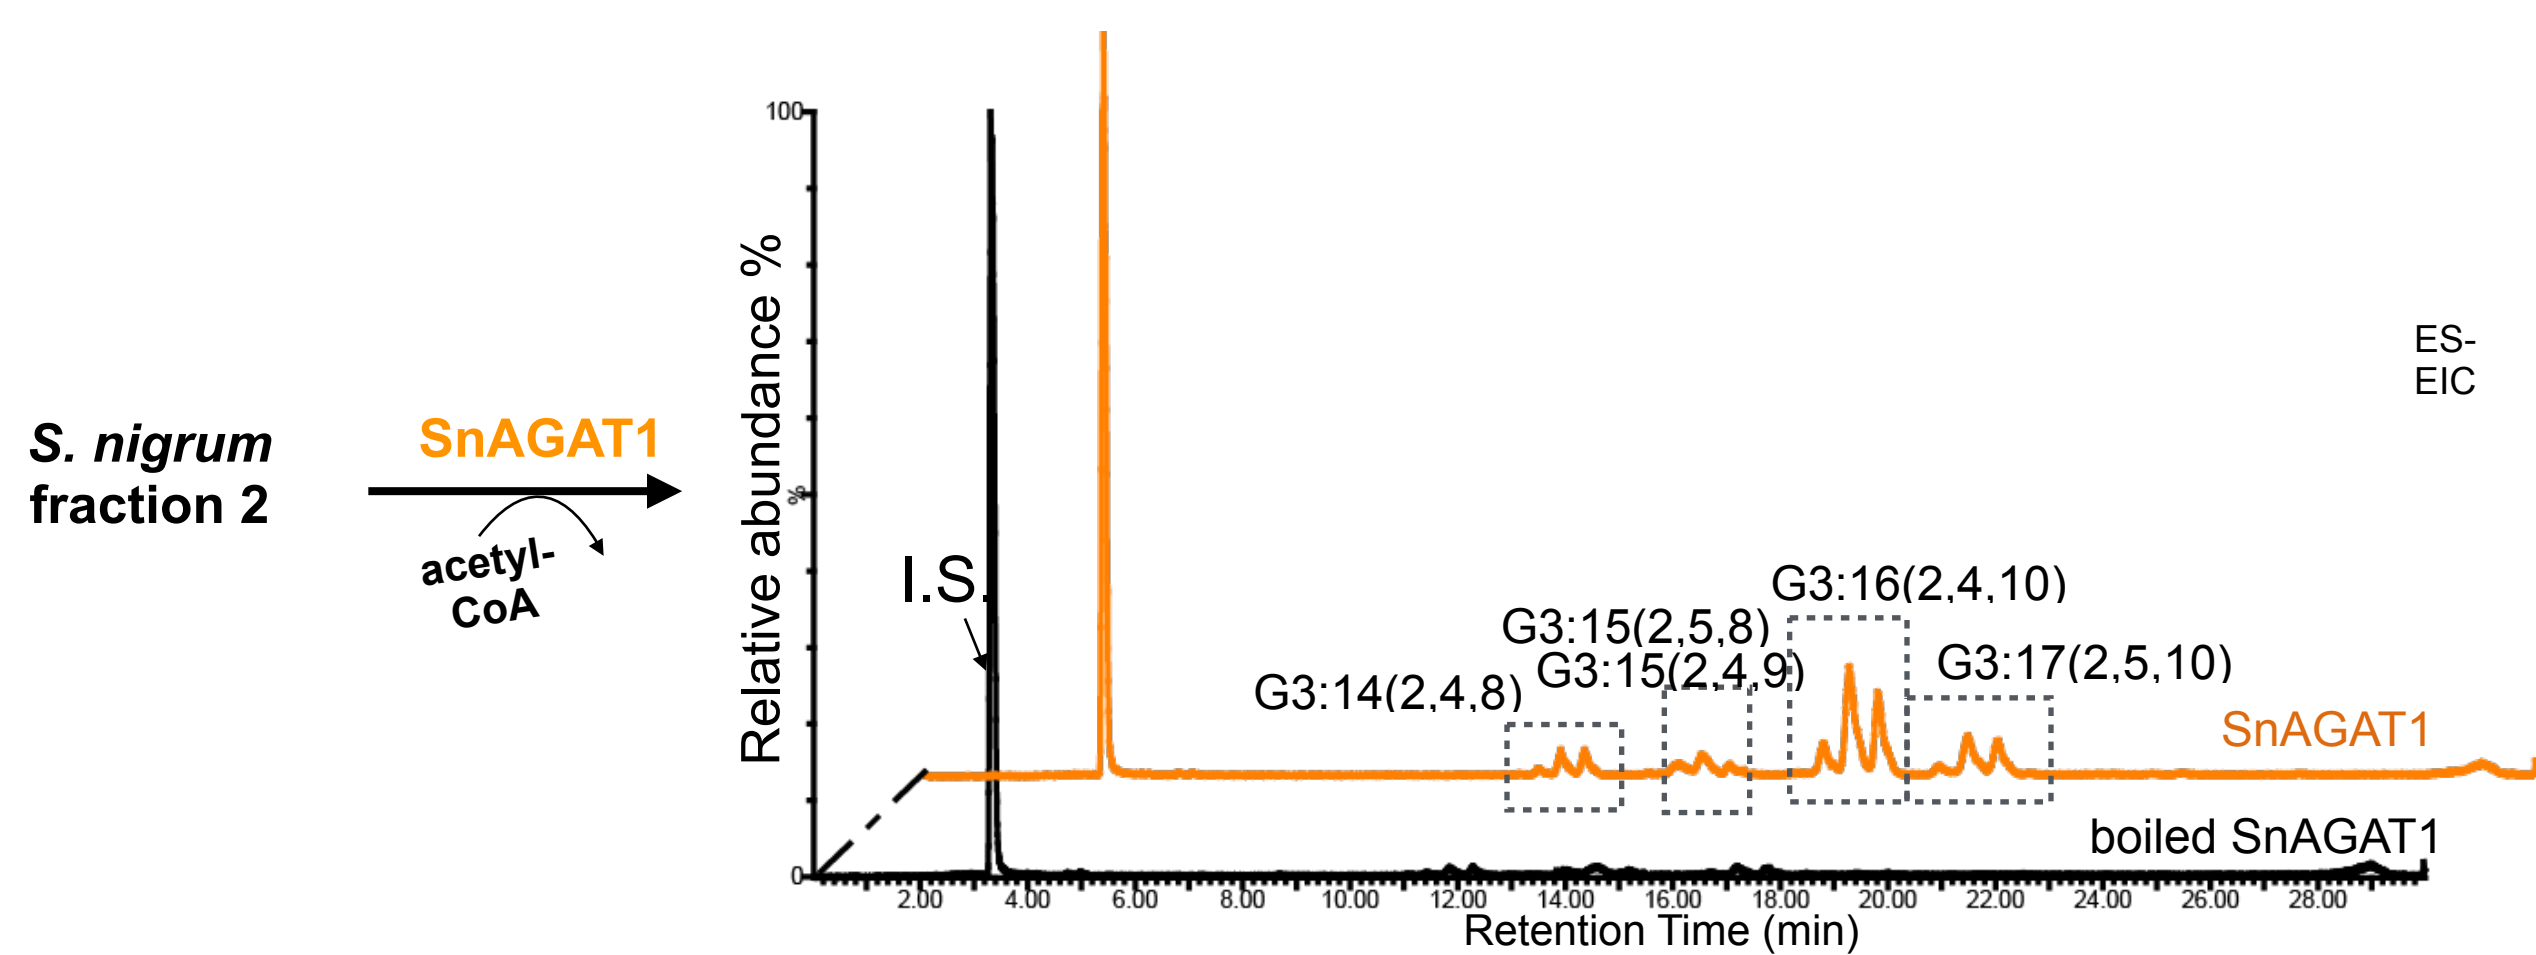

**Fig. S16. SnAGAT1 forward and reverse enzyme assay products agrees with the acetyltransferase converting diacylglucoses to triacylglucoses.** (A) The G3:16 isomers produced from SnASFF1 + SnAGAT1 with *in vitro* (top) and *in vivo* (bottom two) S2:14 isomers all generate mass spectra (0V) that are comparable to *S. nigrum* G3:16 (Fig. S1C). Fragmentation of these G3:16 in 0V ESI- mode are characterized by the loss of C4, C10 and C2 ketenes. (B) Mass spectra of G2:12, G2:13 and G2:14 diacylglucoses produced from SnAGAT1 reverse enzyme assay with *S. nigrum* extract fraction 1 all agrees with losing an acetyl group. (C) LC-MS analysis of enzyme assay products from SnAGAT1 activity (orange trace) shows SnAGAT1 acetylating *S. nigrum* fraction 2 diacylglucoses in the presence of acetyl-CoA. Combined extracted ion chromatogram (EIC) under negative electrospray ionization (ESI-) showing telmisartan as internal standard (I.S.) ( $m/z$  513.23) and formic adducts of G3:14, G3:15, G3:16 and G3:17. The corresponding  $m/z$ 's of these compounds are listed in Table S1 under otherwise specified.

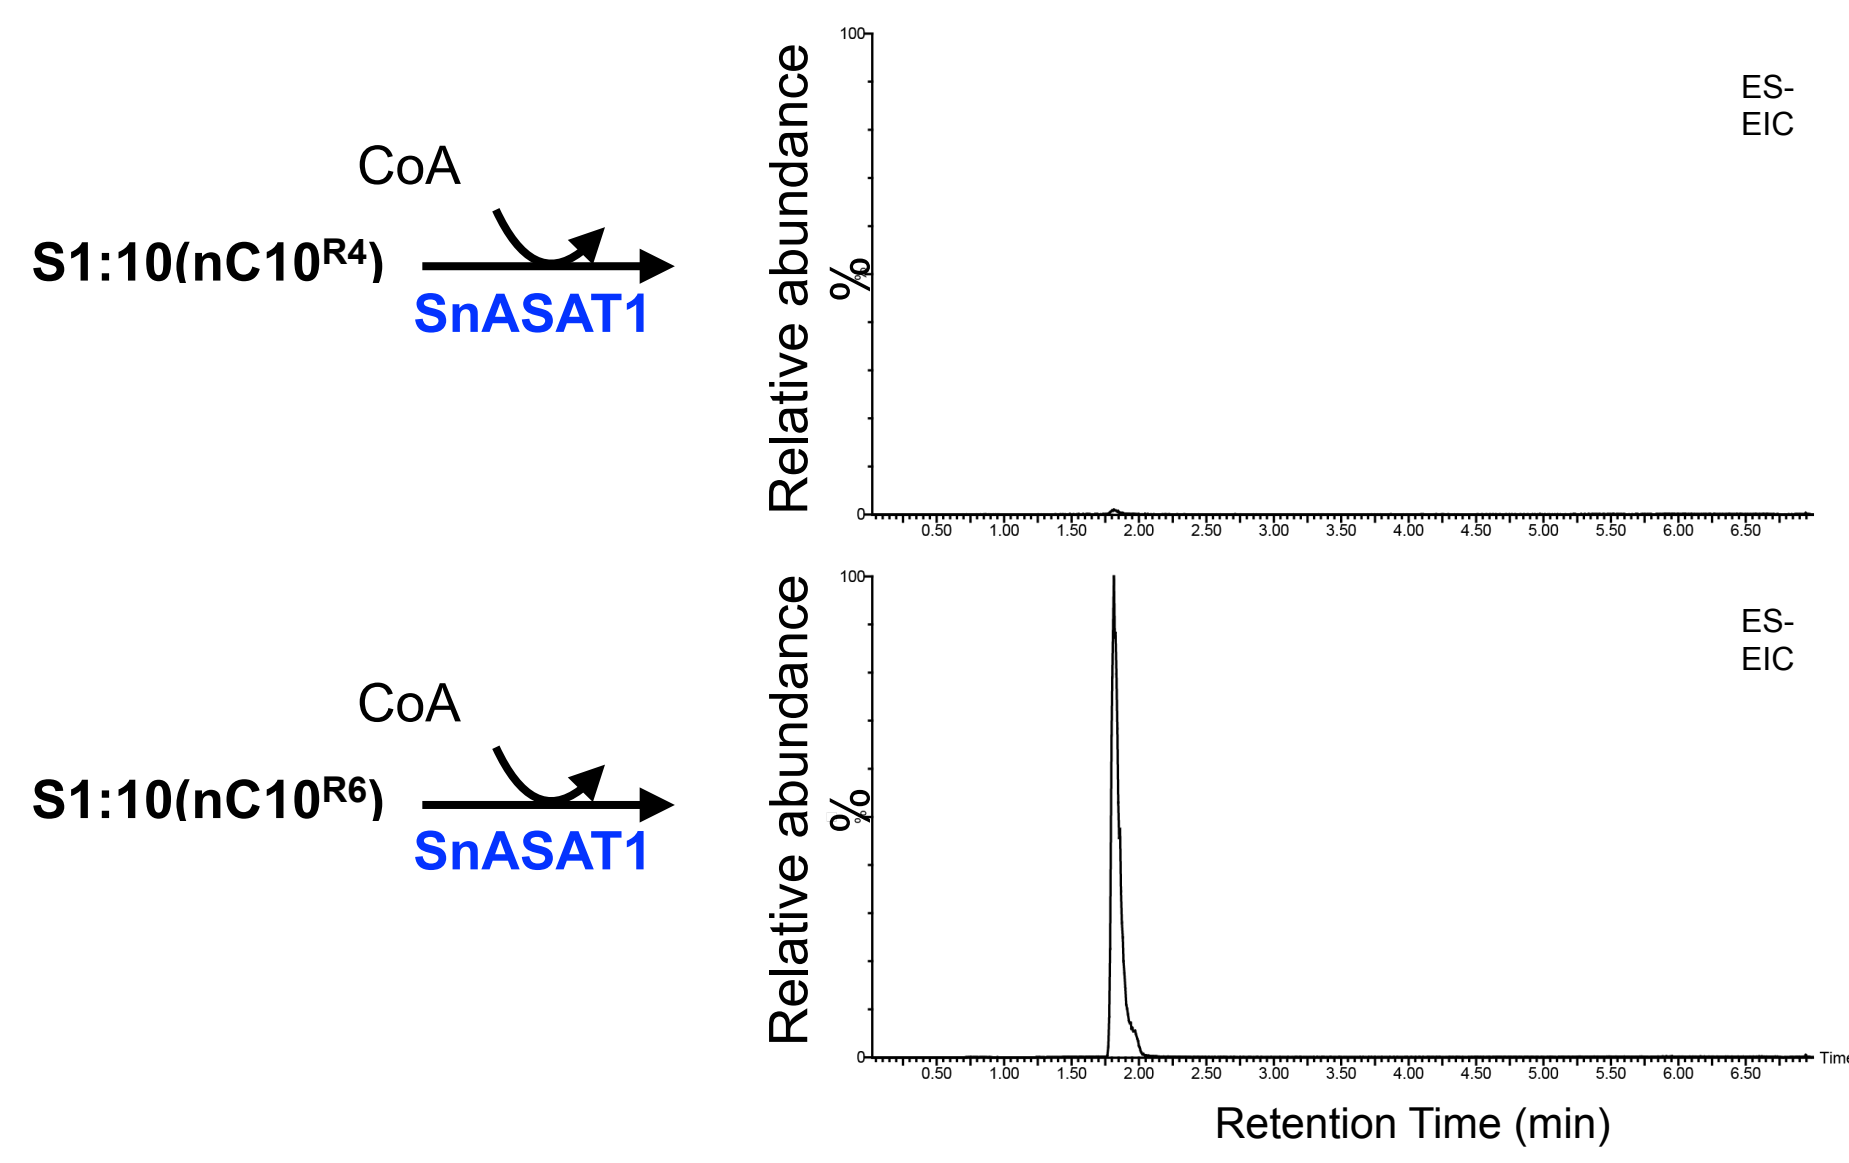

**Fig. S17. SnASAT1 reverse activity deacylates S1:10(10<sup>R4</sup>) but not the rearranged S1:10(10<sup>R6</sup>) isomer.** LC-MS analysis of *in vitro* enzyme assays with purified S1:10(10<sup>R4</sup>) and S1:10(10<sup>R6</sup>) showing SnASAT1 reverse activity diminishes S1:10(10<sup>R4</sup>) accumulation (top) while S1:10(10<sup>R6</sup>) accumulation (bottom) is unaffected. Extracted ion chromatogram showing formate adducts of S1:10 (*m/z* 611.29).



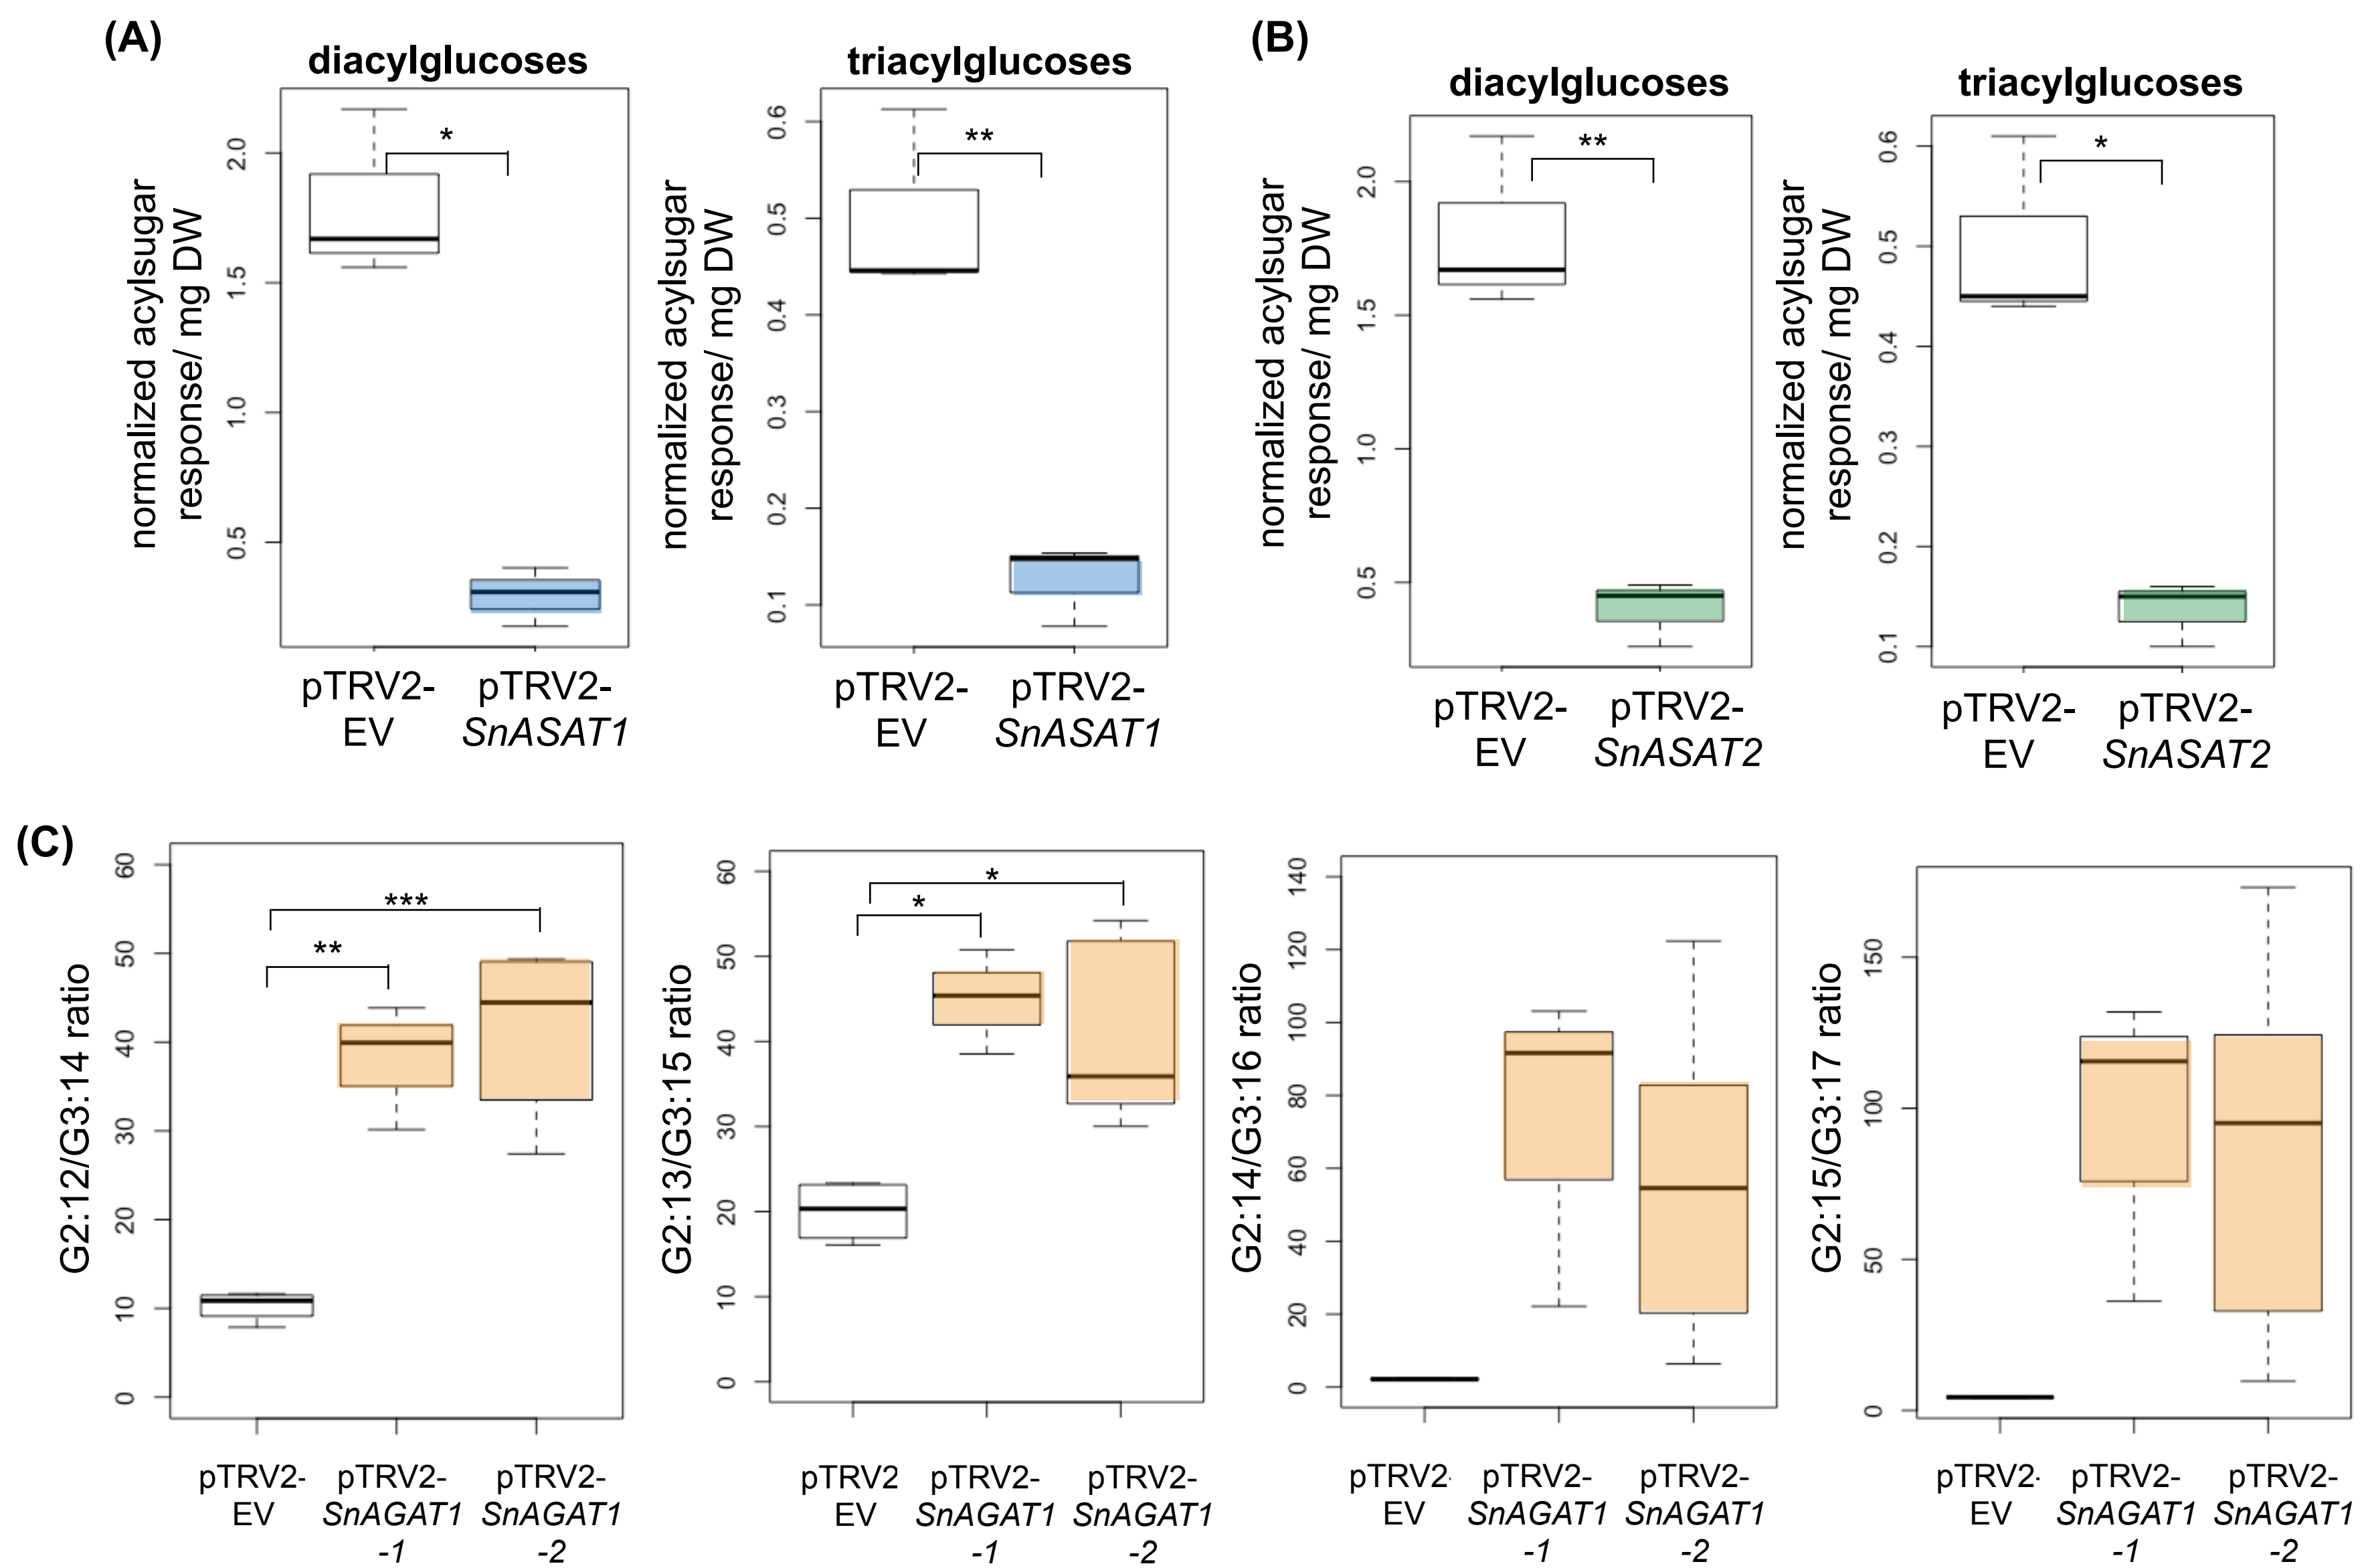

**Fig. S18. Independent VIGS validation of the BAHD enzymes on *S. nigrum* acylglucose biosynthetic pathway.** Comparison of acylglucose accumulation in (A) *SnASAT1*-targeted, (B) *SnASAT2*-targeted and empty vector VIGS plants. Independent experiments using different constructs from data shown in Fig. 8. (C) Comparison of the ratio of G2:12/G3:14, G2:13/G3:15, G2:14/G3:16, and G2:15/G3:17 in *SnAGAT1*-targeted and empty vector VIGS plants. Two constructs targeting different region on *SnAGAT1* were used. Data for pTRV2-*SnAGAT1-1* shown here are biological replicates of data presented in Fig. 8. Acylsugars were analyzed using LC-MS in ESI- mode. Diacylglucose quantities were measured by integrating peak areas of G2:12, G2:13, G2:14 and G2:15, whereas triacylglucose quantities were measured by integrating peak areas of G3:14, G3:15, G3:16 and G3:17. The integrated peak areas were normalized to the internal standard telmisartan (for all) and dry leaf weights (for *SnASAT1*- experiment and *SnASAT2*-silencing experiments). The ratio between tri- and diacylglucoses were independently calculated. The corresponding *m/z* of analyzed acylsugars are listed in Table S1 unless otherwise specified. Significant levels are shown (\*,  $p < 0.05$ ; \*\*,  $p < 0.01$ ; \*\*\*,  $p < 0.001$ ; Welch's two sample t-test).
